# Supplementary material
Source: PubMed Central journal article supplement (PMC3150361)
Supplement: NIHMS312878-supplement-1_si_001.pdf [file NIHMS312878-supplement-1_si_001.pdf]

**Application of a New Chiral Phosphepine to the Catalytic Asymmetric Synthesis  
of Highly Functionalized Cyclopentenes that Bear  
an Array of Heteroatom-Substituted Quaternary Stereocenters**

Yuji Fujiwara and Gregory C. Fu\*

*Department of Chemistry, Massachusetts Institute of Technology,  
Cambridge, Massachusetts 02139*

**SUPPORTING INFORMATION**

**Table of Contents**

|              |                                                                     |              |
|--------------|---------------------------------------------------------------------|--------------|
| <b>I.</b>    | <b>General Information</b>                                          | <b>S-1</b>   |
| <b>II.</b>   | <b>Preparation of Allenes</b>                                       | <b>S-1</b>   |
| <b>III.</b>  | <b>Preparation of Olefins</b>                                       | <b>S-6</b>   |
| <b>IV.</b>   | <b>Catalytic Asymmetric [3+2] Cycloadditions</b>                    | <b>S-7</b>   |
| <b>V.</b>    | <b>Functionalizations of the Cycloaddition Products</b>             | <b>S-22</b>  |
| <b>VI.</b>   | <b>Preparation of Catalyst 1</b>                                    | <b>S-25</b>  |
| <b>VII.</b>  | <b>Determination of the Absolute Configurations of the Products</b> | <b>S-42</b>  |
| <b>VIII.</b> | <b><sup>1</sup>H NMR Spectra</b>                                    | <b>S-148</b> |
| <b>IX.</b>   | <b>HPLC/SFC Traces</b>                                              | <b>S-177</b> |

**I. General Information**

The following solvents were purchased and used as received: *i*-Pr<sub>2</sub>O (anhydrous; Sigma-Aldrich), hexanes (anhydrous; Sigma-Aldrich), and CHCl<sub>3</sub> (anhydrous; Sigma-Aldrich).

HPLC analyses were carried out on an Agilent 1100 Series system, and supercritical fluid chromatography (SFC) analyses were carried out on a Berger SFC MiniGram system. Daicel CHIRALCEL® columns or Daicel CHIRALPAK® columns (internal diameter 4.6 mm, column length 250 mm, particle size 5 μm or 3 μm) were used for both HPLC and SFC analysis (UV detector at a wavelength of 230 nm).

**II. Preparation of Allenes**

**General Procedure.** The alkyl (triphenylphosphoranylidene)acetate (30.0 mmol) and a stir bar were added to a 250-mL flask, which was then evacuated and back-filled with nitrogen (three cycles). CH<sub>2</sub>Cl<sub>2</sub> (91 mL) and NEt<sub>3</sub> (4.05 mL, 29.1 mmol) were added via syringe, and the resulting solution was stirred at r.t. for 1 min. Next, the acid chloride (30.0 mmol) was added dropwise via syringe over 2 min to the stirred

solution. The reaction mixture was stirred at r.t. for 1 h, and then it was concentrated under reduced pressure to one-third of the original volume. Hexane (100 mL) and silica gel (5 g) were added, and the mixture was stirred at r.t. for 1 h. Next, the mixture was passed through a pad of silica gel and washed with hexane/Et<sub>2</sub>O (150 mL). The filtrate was concentrated under reduced pressure, and the residue was purified by column chromatography, which furnished the allenolate as a colorless oil.

The yields have not been optimized. For the cycloadditions, care should be taken that no carboxylic acid (derived from the acid chloride) is present.

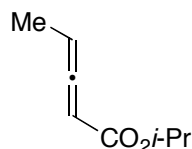

**(±)-Isopropyl penta-2,3-dienoate.** The title compound was prepared from propionyl chloride according to the General Procedure (purification by distillation under reduced pressure; 51% yield).

<sup>1</sup>H NMR (CDCl<sub>3</sub>, 400 MHz) δ 5.50-5.62 (m, 2H), 5.05 (qq, *J* = 6.0, 6.0 Hz, 1H), 1.75-1.81 (m, 3H), 1.26 (d, *J* = 6.0 Hz, 6H);

<sup>13</sup>C NMR (CDCl<sub>3</sub>, 100 MHz) δ 212.7, 165.6, 90.0, 88.0, 67.9, 21.70, 21.68, 12.7;

IR (film) 2982, 2935, 1964, 1713, 1468, 1456, 1411, 1387, 1374, 1335, 1287, 1264, 1171, 1108, 1069, 979, 909, 871, 835, 797, 745, 651, 574 cm<sup>-1</sup>;

LRMS (APCI) calcd for C<sub>8</sub>H<sub>12</sub>O<sub>2</sub> (M<sup>+</sup>) 140.1, found 141.1.

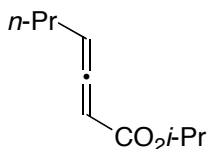

**(±)-Isopropyl hepta-2,3-dienoate.** The title compound was prepared from valeroyl chloride according to the General Procedure (purification by column chromatography: 20:1 hexane/Et<sub>2</sub>O; 56% yield).

<sup>1</sup>H NMR (CDCl<sub>3</sub>, 400 MHz) δ 5.52-5.63 (m, 2H), 5.05 (qq, *J* = 6.2, 6.2 Hz, 1H), 2.08-2.14 (m, 2H), 1.45-1.55 (m, 2H), 1.26 (d, *J* = 6.2 Hz, 3H), 1.25 (d, *J* = 6.2 Hz, 3H), 0.95 (t, *J* = 7.4 Hz, 3H);

<sup>13</sup>C NMR (CDCl<sub>3</sub>, 100 MHz) δ 212.2, 165.8, 95.0, 88.5, 67.9, 29.5, 21.9, 21.77, 21.75, 13.4;

IR (film) 2980, 2936, 2875, 1961, 1713, 1467, 1418, 1386, 1374, 1336, 1324, 1291, 1262, 1170, 1109, 981, 878, 836, 798, 746, 663, 571 cm<sup>-1</sup>;

LRMS (APCI) calcd for C<sub>10</sub>H<sub>17</sub>O<sub>2</sub> (M+H) 169.1, found 169.2.

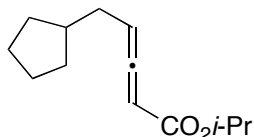

**(±)-Isopropyl 5-cyclopentylpenta-2,3-dienoate.** The title compound was prepared from 3-cyclopentanoyl chloride according to the General Procedure (purification by column chromatography: 25:1 hexane/Et<sub>2</sub>O; 55% yield).

<sup>1</sup>H NMR (CDCl<sub>3</sub>, 400 MHz) δ 5.50-5.61 (m, 2H), 5.05 (qq, *J* = 6.0, 6.0 Hz, 1H), 2.10-2.18 (m, 2H), 1.90-2.02 (m, 1H), 1.75-1.85 (m, 2H), 1.48-1.67 (m, 4H), 1.26 (d, *J* = 6.0 Hz, 3H), 1.25 (d, *J* = 6.0 Hz, 3H), 1.15-1.26 (m, 2H);

<sup>13</sup>C NMR (CDCl<sub>3</sub>, 100 MHz) δ 212.5, 165.8, 94.4, 88.1, 67.9, 39.4, 33.9, 32.18, 32.14, 25.19, 25.15, 21.79, 21.78;

IR (film) 2979, 2950, 2869, 1962, 1713, 1468, 1453, 1418, 1386, 1374, 1261, 1168, 1109, 978, 871, 836, 798, 746, 664 cm<sup>-1</sup>;

LRMS (APCI) calcd for C<sub>13</sub>H<sub>21</sub>O<sub>2</sub> (M+H) 209.2, found 209.2.

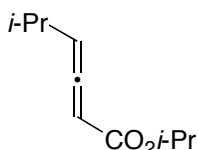

**(±)-Isopropyl 5-methylhexa-2,3-dienoate.** The title compound was prepared from isovaleroyl chloride according to the General Procedure (purification by column chromatography using gradient elution: 10:0 to 10:1 hexane/Et<sub>2</sub>O; 26% yield).

<sup>1</sup>H NMR (CDCl<sub>3</sub>, 400 MHz) δ 5.57-5.64 (m, 2H), 5.04 (qq, *J* = 6.4, 6.4 Hz, 1H), 2.41-2.52 (m, 1H), 1.26 (d, *J* = 6.4 Hz, 3H), 1.25 (d, *J* = 6.4 Hz, 3H), 1.08 (d, *J* = 6.8 Hz, 6H);

<sup>13</sup>C NMR (CDCl<sub>3</sub>, 100 MHz) δ 211.1, 165.7, 102.3, 89.6, 67.8, 27.6, 22.19, 22.12, 21.73, 21.70;

IR (film) 2966, 2874, 1959, 1713, 1468, 1414, 1374, 1318, 1260, 1167, 1110, 980, 873, 838, 807, 748, 668 cm<sup>-1</sup>;

LRMS (APCI) calcd for C<sub>10</sub>H<sub>17</sub>O<sub>2</sub> (M+H) 169.1, found 169.2.

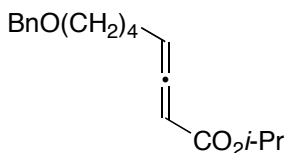

**(±)-Isopropyl 8-(benzyloxy)octa-2,3-dienoate.** The title compound was prepared from 6-(benzyloxy)hexanoyl chloride<sup>1</sup> according to the General Procedure (purification by column chromatography: 5:1 hexane/Et<sub>2</sub>O; 47% yield).

(1) Koch, G.; Loiseleur, O.; Altmann, K.-H. *Synlett* 2004, 693–697.

$^1\text{H}$  NMR ( $\text{CDCl}_3$ , 400 MHz)  $\delta$  7.24-7.36 (m, 5H), 5.52-5.61 (m, 2H), 5.03 (qq,  $J = 6.4, 6.4$  Hz, 1H), 4.48 (s, 2H), 3.47 (t,  $J = 6.4$  Hz, 1H), 2.14 (ddd,  $J = 14.4, 7.2, 3.2$  Hz, 1H), 1.65-1.73 (m, 2H), 1.51-1.60 (m, 2H), 1.24 (d,  $J = 6.4$  Hz, 3H), 1.23 (d,  $J = 6.4$  Hz, 3H);

$^{13}\text{C}$  NMR ( $\text{CDCl}_3$ , 100 MHz)  $\delta$  212.1, 165.6, 138.5, 128.2, 127.44, 127.36, 94.9, 88.6, 72.7, 69.8, 67.9, 28.8, 27.2, 25.3, 21.71, 21.70;

IR (film) 2980, 2938, 2860, 1961, 1710, 1496, 1454, 1418, 1373, 1262, 1169, 1108, 978, 872, 800, 736  $\text{cm}^{-1}$ ;

LRMS (APCI) calcd for  $\text{C}_{18}\text{H}_{25}\text{O}_3$  (M+H) 289.4, found 289.2.

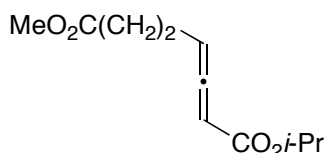

**(±)-1-Isopropyl-7-methyl hepta-2,3-dienedioate.** The title compound was prepared from methyl 5-chloro-5-oxopentanoate according to the General Procedure (purification by column chromatography using gradient elution: 3:1 to 2:1 hexane/ $\text{Et}_2\text{O}$ ; 56% yield).

$^1\text{H}$  NMR ( $\text{CDCl}_3$ , 400 MHz)  $\delta$  5.66-5.72 (m, 1H), 5.58-5.62 (m, 1H), 5.04 (qq,  $J = 6.4, 6.4$  Hz, 1H), 3.69 (s, 3H), 2.40-2.52 (m, 4H), 1.27 (d,  $J = 6.4$  Hz, 3H), 1.25 (d,  $J = 6.4$  Hz, 3H);

$^{13}\text{C}$  NMR ( $\text{CDCl}_3$ , 100 MHz)  $\delta$  211.8, 172.8, 165.3, 94.1, 89.8, 68.2, 51.6, 32.8, 22.5, 21.74, 21.72;

IR (film) 2982, 2953, 1963, 1740, 1712, 1438, 1420, 1374, 1264, 1171, 1108, 1055, 984, 876, 837, 804, 747, 666  $\text{cm}^{-1}$ ;

LRMS (APCI) calcd for  $\text{C}_{11}\text{H}_{16}\text{NaO}_4$  (M+Na) 235.1, found 235.1.

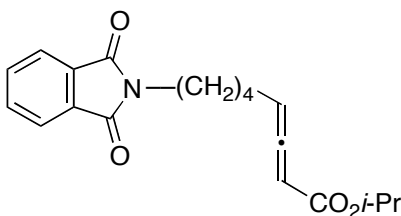

**(±)-Isopropyl 8-(1,3-dioxoisindolin-2-yl)octa-2,3-dienoate.** The title compound was prepared from 6-(1, 3-dioxoisindolin-2-yl)pentanoyl chloride<sup>2</sup> according to the General Procedure (purification by column chromatography using gradient elution: 4:0 to 4:1 hexane/ $\text{EtOAc}$ ; 48% yield).

(2) Guénin, E.; Monteil, M.; Bouchemal, N.; Prangé, T.; Lecouvey, M. *Eur. J. Org. Chem.* **2007**, 3380–3391.

$^1\text{H}$  NMR ( $\text{CDCl}_3$ , 400 MHz)  $\delta$  7.82-7.86 (m, 2H), 7.70-7.75 (m, 2H), 5.54-5.62 (m, 2H), 5.02 (qq,  $J = 6.4, 6.4$  Hz, 1H), 3.70 (t,  $J = 7.2$  Hz, 2H), 2.15-2.24 (m, 2H), 1.72-1.82 (m, 2H), 1.49-1.57 (m, 2H), 1.24 (d,  $J = 6.4$  Hz, 3H), 1.22 (d,  $J = 6.4$  Hz, 3H);

$^{13}\text{C}$  NMR ( $\text{CDCl}_3$ , 100 MHz)  $\delta$  212.1, 168.3, 165.6, 133.8, 132.0, 123.1, 94.6, 88.8, 68.0, 37.5, 27.7, 26.9, 25.8, 21.72, 21.70;

IR (film) 2980, 2939, 2864, 1961, 1773, 1710, 1616, 1467, 1437, 1397, 1373, 1337, 1264, 1172, 1108, 1041, 979, 875, 798, 720, 668  $\text{cm}^{-1}$ ;

LRMS (APCI) calcd for  $\text{C}_{19}\text{H}_{21}\text{NNaO}_4$  ( $\text{M}+\text{Na}$ ) 350.1, found 350.1.

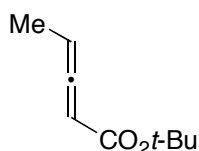

**(±)-tert-Butyl penta-2,3-dienoate.** The title compound was prepared from propionyl chloride according to the General Procedure (purification by distillation under reduced pressure; 23% yield).

$^1\text{H}$  NMR ( $\text{CDCl}_3$ , 400 MHz)  $\delta$  5.43-5.51 (m, 1H), 5.36-5.41 (m, 1H), 1.69 (dd,  $J = 5.2, 3.2$  Hz, 3H), 1.40 (s, 9H);

$^{13}\text{C}$  NMR ( $\text{CDCl}_3$ , 100 MHz)  $\delta$  212.4, 165.4, 89.8, 89.1, 80.5, 27.9, 12.7;

IR (film) 2979, 2932, 1965, 1707, 1480, 1457, 1407, 1368, 1291, 1257, 1147  $\text{cm}^{-1}$ ;

LRMS (EI) calcd for  $\text{C}_9\text{H}_{14}\text{NaO}_2$  ( $\text{M}+\text{Na}$ ) 177.09, found 177.09.

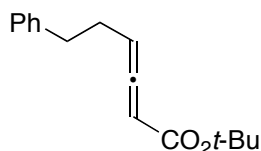

**(±)-tert-Butyl 6-phenylhexa-2,3-dienoate.** The title compound was prepared from 4-phenyl butanoyl chloride according to the General Procedure (purification by column chromatography: 20:1 hexane/ $\text{Et}_2\text{O}$ ; 32% yield).

$^1\text{H}$  NMR ( $\text{CDCl}_3$ , 400 MHz)  $\delta$  7.26-7.31 (m, 2H), 7.17-7.22 (m, 3H), 5.58-5.64 (m, 1H), 5.50-5.54 (m, 1H), 2.71-2.84 (m, 2H), 2.40-2.47 (m, 2H), 1.49 (s, 9H);

$^{13}\text{C}$  NMR ( $\text{CDCl}_3$ , 100 MHz)  $\delta$  211.7, 165.3, 140.9, 128.29, 128.26, 126.0, 94.4, 90.1, 80.6, 35.0, 29.1, 28.0;

IR (film) 3413, 3064, 3028, 2978, 2932, 2860, 1961, 1706, 1604, 1497, 1479, 1455, 1415, 1392, 1368, 1334, 1285, 1256, 1144, 1078, 1031  $\text{cm}^{-1}$ ;

LRMS (EI) calcd for  $\text{C}_{16}\text{H}_{20}\text{NaO}_2$  ( $\text{M}+\text{Na}$ ) 267.14, found 267.14.

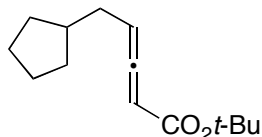

**(±)-*tert*-Butyl 5-cyclopentylpenta-2,3-dienoate.** The title compound was prepared from 3-cyclopentylpropanoyl chloride according to the General Procedure (purification by column chromatography: 30:1 hexane / Et<sub>2</sub>O; 31% yield).

<sup>1</sup>H NMR (CDCl<sub>3</sub>, 400 MHz) δ 5.46-5.51 (m, 1H), 5.38-5.42 (m, 1H), 2.04-2.09 (m, 2H), 1.85-1.96 (m, 1H), 1.69-1.78 (m, 2H), 1.44-1.60 (m, 4H), 1.42 (s, 9H), 1.09-1.18 (m, 2H);

<sup>13</sup>C NMR (CDCl<sub>3</sub>, 100 MHz) δ 212.0, 165.5, 94.2, 89.2, 80.5, 39.4, 33.9, 32.1 (2C), 28.0, 25.2, 25.1;

IR (film) 2951, 2869, 1961, 1706, 1479, 1455, 1416, 1392, 1367, 1281, 1143 cm<sup>-1</sup>;

LRMS (EI) calcd for C<sub>14</sub>H<sub>22</sub>NaO<sub>2</sub> (M+Na) 245.15, found 245.15.

### III. Preparation of Olefins

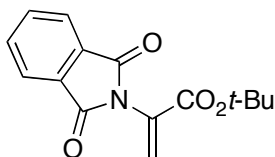

***tert*-Butyl 2-(1,3-dioxoisindolin-2-yl)acrylate.** *tert*-Butyl 2-(1,3-dioxoisindolin-2-yl)-3-hydroxypropanoate<sup>3</sup> (11.7 g, 40.3 mmol) and a stir bar were added to a 500-mL flask, which was then evacuated and back-filled with nitrogen (three cycles). CH<sub>2</sub>Cl<sub>2</sub> (250 mL) and NEt<sub>3</sub> (20.2 mL, 145 mmol) were added via syringe, and the resulting solution was stirred in an ice bath for 15 min. Methanesulfonyl chloride (3.89 mL, 50.3 mmol) was then added dropwise via syringe over 3 min to the stirred solution. Next, the ice bath was removed, and the mixture was stirred at r.t. for 1 h. Water (250 mL) was added, the layers were separated, and the aqueous phase was extracted with CH<sub>2</sub>Cl<sub>2</sub> (125 mL). The combined organic layers were washed with brine, dried over Na<sub>2</sub>SO<sub>4</sub>, and concentrated under reduced pressure. The residue was purified by column chromatography using gradient elution: 4:1 to 1:1 hexane / Et<sub>2</sub>O. The white solid thus obtained was recrystallized from EtOAc (10 mL) and hexane (30 mL) to give the product as a white solid (8.17 g, 74% yield).

Mp 100 °C.

<sup>1</sup>H NMR (CDCl<sub>3</sub>, 400 MHz) δ 7.88-7.94 (m, 2H), 7.76-7.81 (m, 2H), 6.59 (s, 1H), 5.92 (s, 1H), 1.49 (s, 9H);

<sup>13</sup>C NMR (CDCl<sub>3</sub>, 100 MHz) δ 166.5, 161.1, 134.3, 131.8, 130.5, 126.6, 123.7, 82.7, 27.8;

- (3) Synthesized from (±)-*N*-phthaloyl-*O*-benzyl serine by reaction with *tert*-butyl trichloroacetimidate, followed by hydrogenolysis of benzyl group.

IR (KBr) 2999, 2983, 2967, 1791, 1721, 1646, 1468, 1373, 1288, 1258, 1213, 1141, 1103, 971, 935, 885, 846, 796, 763, 717, 678, 668, 650  $\text{cm}^{-1}$ ;

LRMS (APCI) calcd for  $\text{C}_{15}\text{H}_{15}\text{NNaO}_4$  ( $\text{M}+\text{Na}$ ) 296.09, found 296.10.

#### IV. Catalytic Asymmetric [3+2] Cycloadditions

**General Procedure A (Table 2).** In a glovebox, an oven-dried 20-mL vial was charged with catalyst (*S*)-**1** (13.5 mg, 0.025 mmol), the olefin (0.50 mmol), anhydrous *i*-Pr<sub>2</sub>O (4.7 mL), a stir bar, and then the allene (0.75 mmol). The vial was capped and taken out of the glovebox, and the reaction mixture was stirred at r.t. for 24 h. Next, *tert*-butyl hydroperoxide (10  $\mu\text{L}$ ; 5-6 M solution in isooctane) was added, the mixture was stirred for 1 min, and then an aqueous solution of  $\text{Na}_2\text{S}_2\text{O}_3$  (5 mL; 10%) was added. The aqueous layer was extracted with Et<sub>2</sub>O or EtOAc (4 mL x3), and the combined organic layers were washed with brine, dried over  $\text{Na}_2\text{SO}_4$ , and concentrated under reduced pressure. The residue was purified by column chromatography.

When the [3+2] cycloaddition illustrated in entry 3 of Table 2 was conducted *without* the use of a glovebox, a higher catalyst loading (10%) was necessary to obtain a good yield of product (92%).

**General Procedure B (Tables 3–6).** In a glovebox, an oven-dried 20-mL vial was charged with catalyst (*S*)-**1** (27.0 mg, 0.050 mmol), the olefin (0.50 mmol), anhydrous *i*-Pr<sub>2</sub>O (4.7 mL), a stir bar, and then the allene (1.00 mmol). The vial was capped and taken out of the glovebox, and the reaction mixture was stirred at r.t. for 24 h. Next, *tert*-butyl hydroperoxide (10  $\mu\text{L}$ ; 5-6 M solution in isooctane) was added, the mixture was stirred for 1 min, and then an aqueous solution of  $\text{Na}_2\text{S}_2\text{O}_3$  (5 mL; 10%) was added. The aqueous layer was extracted with Et<sub>2</sub>O or EtOAc (4 mL x3), and the combined organic layers were washed with brine, dried over  $\text{Na}_2\text{SO}_4$ , and concentrated under reduced pressure. The residue was purified by column chromatography.

For the oxygen-substituted olefin (Table 5), hexane was employed as the solvent (0.4 M), and the reaction time was 48 h.

For the sulfur-substituted olefin (Table 6), chloroform was used as solvent.

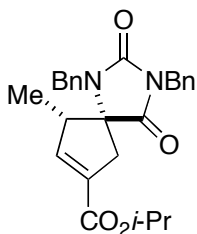

**(5*R*,9*S*)-Isopropyl 1,3-dibenzyl-9-methyl-2,4-dioxo-1,3-diazaspiro[4.4]non-7-ene-7-carboxylate (Table 2, entry 1).** The title compound was prepared according to General

Procedure A from ( $\pm$ )-isopropyl penta-2,3-dienoate (105 mg, 0.75 mmol) and 1,3-dibenzyl-5-methyleneimidazolidine-2,4-dione (146 mg, 0.50 mmol). After purification by column chromatography (4:1  $\rightarrow$  3:1 hexane/EtOAc), the title compound was isolated as a colorless oil (213 mg, 99% yield, rr: 9:1) with 98% ee.

$[\alpha]_D^{24} = +93$  ( $c = 1.0$ ,  $\text{CHCl}_3$ ).

HPLC analysis of the product: Daicel CHIRALPAK IC column; 30% 2-PrOH in hexane; 0.7 mL/min; retention times: 11.0 min (major), 17.5 min (minor).

The second run was performed with (*R*)-1. The ratio of regioisomers was determined to be 8:1 by  $^1\text{H}$  NMR analysis of the unpurified mixture. The product was isolated as a colorless oil (210 mg, 97% yield, rr: 9:1) with 98% ee.

$^1\text{H}$  NMR ( $\text{CDCl}_3$ , 400 MHz)  $\delta$  7.21-7.43 (m, 10H), 6.61-6.65 (m, 1H), 5.04 (d,  $J = 15.4$  Hz, 1H), 4.98 (qq,  $J = 6.4, 6.4$  Hz, 1H), 4.77 (d,  $J = 14.6$  Hz, 1H), 4.72 (d,  $J = 14.6$  Hz, 1H), 3.84 (d,  $J = 15.4$  Hz, 1H), 3.38-3.47 (m, 1H), 3.01 (ddd,  $J = 17.0, 2.8, 2.8$  Hz, 1H), 2.34 (d,  $J = 17.0$  Hz, 1H), 1.23 (d,  $J = 6.4$  Hz, 3H), 1.16 (d,  $J = 6.4$  Hz, 3H), 0.91 (d,  $J = 7.6$  Hz, 3H);

$^{13}\text{C}$  NMR ( $\text{CDCl}_3$ , 100 MHz)  $\delta$  174.2, 163.0, 155.8, 143.6, 137.1, 136.2, 133.0, 128.64, 128.58, 128.2, 128.0, 127.82, 127.76, 74.2, 67.9, 48.6, 45.2, 42.8, 39.9, 21.75, 21.71, 10.9;

IR (film) 3854, 3745, 2979, 1772, 1710, 1653, 1636, 1559, 1540, 1506, 1497, 1442, 1419, 1362, 1242, 1008, 1075  $\text{cm}^{-1}$ ;

LRMS (APCI) calcd for  $\text{C}_{26}\text{H}_{28}\text{N}_2\text{NaO}_4$  ( $\text{M}+\text{Na}$ ) 455.2, found 455.2.

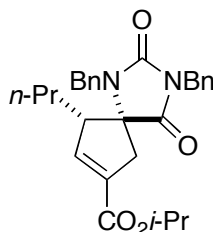

**(5*R*,9*S*)-Isopropyl 1,3-dibenzyl-2,4-dioxo-9-propyl-1,3-diazaspiro[4.4]non-7-ene-7-carboxylate (Table 2, entry 2).** The title compound was prepared according to General Procedure A from ( $\pm$ )-isopropyl hepta-2,3-dienoate (126 mg, 0.75 mmol) and 1,3-dibenzyl-5-methyleneimidazolidine-2,4-dione (146 mg, 0.50 mmol). After purification by column chromatography (5:1  $\rightarrow$  4:1 hexane/EtOAc), the title compound was isolated as a colorless oil (228 mg, 99% yield, rr: 14:1) with 97% ee.

$[\alpha]_D^{24} = +80$  ( $c = 1.0$ ,  $\text{CHCl}_3$ ).

HPLC analysis of the product: Daicel CHIRALPAK AD-H column; 3% 2-PrOH in hexane; 1.0 mL/min; retention times: 20.5 min (minor), 27.5 min (major).

The second run was performed with (*R*)-1. The ratio of regioisomers was determined to be 15:1 by  $^1\text{H}$  NMR analysis of the unpurified mixture. The product was isolated as a colorless oil (216 mg, 94% yield, rr: >20:1) with 96% ee.

$^1\text{H}$  NMR ( $\text{CDCl}_3$ , 400 MHz)  $\delta$  7.17-7.42 (m, 10H), 6.65-6.69 (m, 1H), 4.98 (d,  $J = 15.4$  Hz, 1H), 4.95 (qq,  $J = 6.4, 6.4$  Hz, 1H), 4.74 (d,  $J = 14.2$  Hz, 1H), 4.69 (d,  $J = 14.2$  Hz, 1H), 3.83 (d,  $J = 15.4$  Hz, 1H), 3.22-3.29 (m, 1H), 2.97 (ddd,  $J = 17.2, 3.0, 3.0$  Hz, 1H), 2.30 (d,  $J =$



17.2 Hz, 1H), 1.20 (d,  $J = 6.4$  Hz, 3H), 1.14 (d,  $J = 6.4$  Hz, 3H), 0.98-1.30 (m, 4H), 0.70 (d,  $J = 6.4$  Hz, 3H);

$^{13}\text{C}$  NMR ( $\text{CDCl}_3$ , 100 MHz)  $\delta$  174.4, 163.0, 155.8, 142.4, 137.1, 135.9, 132.8, 128.51 (2C), 128.45, 128.0, 127.8, 127.7, 73.9, 67.8, 53.8, 45.2, 42.8, 40.3, 28.6, 21.70, 21.66, 21.1, 13.8;

IR (film) 3854, 3745, 3629, 1772, 1710, 1653, 1636, 1559, 1540, 1507, 1497, 1442, 1419, 1266, 1109, 754, 700, 668  $\text{cm}^{-1}$ ;

LRMS (APCI) calcd for  $\text{C}_{28}\text{H}_{32}\text{N}_2\text{NaO}_4$  ( $\text{M}+\text{Na}$ ) 483.2, found 483.2.

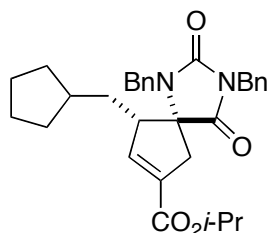

**(5R,9S)-Isopropyl 1,3-dibenzyl-9-(cyclopentylmethyl)-2,4-dioxo-1,3-diazaspiro[4.4]non-7-ene-7-carboxylate (Table 2, entry 3).** The title compound was prepared according to General Procedure A from ( $\pm$ )-isopropyl 5-cyclopentylpenta-2,3-dienoate (156 mg, 0.75 mmol) and 1,3-dibenzyl-5-methyleneimidazolidine-2,4-dione (146 mg, 0.50 mmol). After purification by column chromatography (3:1 hexane/ $\text{Et}_2\text{O}$ ), the title compound was isolated as white semi-solid (235 mg, 94% yield, rr: 14:1) with 92% ee.

$[\alpha]_D^{24} = +74$  ( $c = 1.0$ ,  $\text{CHCl}_3$ ).

SFC analysis of the product: Daicel CHIRALPAK IC-3 column; 20% MeOH in  $\text{CO}_2$ ; 3.0 mL/min; retention times: 4.4 min (major), 6.0 min (minor).

The second run was performed with (*R*)-1. The ratio of regioisomers was determined to be 17:1 by  $^1\text{H}$  NMR analysis of the unpurified mixture. The product was isolated as white semi-solid (248 mg, 99% yield, rr: 14:1) with 92% ee.

$^1\text{H}$  NMR ( $\text{CDCl}_3$ , 400 MHz)  $\delta$  7.20-7.45 (m, 10H), 6.69-6.74 (m, 1H), 4.99 (d,  $J = 14.8$  Hz, 1H), 4.97 (qq,  $J = 6.4, 6.4$  Hz, 1H), 4.75 (d,  $J = 14.4$  Hz, 1H), 4.71 (d,  $J = 14.4$  Hz, 1H), 3.85 (d,  $J = 14.8$  Hz, 1H), 3.26-3.34 (m, 1H), 3.00 (ddd,  $J = 17.2, 2.8, 2.8$  Hz, 1H), 2.33 (d,  $J = 17.2$  Hz, 1H), 1.25-1.64 (m, 8H), 1.23 (d,  $J = 6.4$  Hz, 3H), 1.16 (d,  $J = 6.4$  Hz, 3H), 0.73-1.06 (m, 3H);

$^{13}\text{C}$  NMR ( $\text{CDCl}_3$ , 100 MHz)  $\delta$  174.2, 163.0, 155.8, 142.6, 137.1, 136.0, 132.8, 128.53, 128.50, 128.47, 128.0, 127.8, 127.7, 74.1, 67.8, 53.1, 45.3, 42.7, 40.1, 38.0, 32.7, 32.6, 32.3, 24.9, 24.8, 21.71, 21.68;

IR (film) 2945, 1768, 1711, 1496, 1442, 1418, 1360, 1265, 1136, 1108, 751, 700, 624  $\text{cm}^{-1}$ ;

LRMS (APCI) calcd for  $\text{C}_{31}\text{H}_{36}\text{N}_2\text{NaO}_4$  ( $\text{M}+\text{Na}$ ) 523.3, found 523.3.

This compound was recrystallized from hexane to give a single crystal, which was submitted to the X-ray structure analysis (mp 115  $^\circ\text{C}$ ).

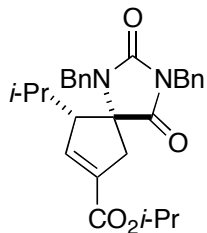

**(5R,9S)-Isopropyl 1,3-dibenzyl-9-isopropyl-2,4-dioxo-1,3-diazaspiro[4.4]non-7-ene-7-carboxylate (Table 2, entry 4).** The title compound was prepared according to General Procedure A with 10% catalyst from ( $\pm$ )-isopropyl 5-methylhexa-2,3-dienoate (126 mg, 0.75 mmol) and 1,3-dibenzyl-5-methyleneimidazolidine-2,4-dione (146 mg, 0.50 mmol). After purification by column chromatography ( $\text{CH}_2\text{Cl}_2$ , then 4:1 hexane/EtOAc), the title compound was isolated as a colorless oil (206 mg, 89% yield, rr: >20:1) with 75% ee.

$[\alpha]_D^{24} = +51$  ( $c = 1.0$ ,  $\text{CHCl}_3$ ).

HPLC analysis of the product: Daicel CHIRALPAK AD-H column; 3% 2-PrOH in hexane; 1.0 mL/min; retention times: 25.5 min (minor), 29.2 min (major).

The second run was performed with (*R*)-**1**. The ratio of regioisomers was determined to be 50:1 by  $^1\text{H}$  NMR analysis of the unpurified mixture. The product was isolated as a colorless oil (218 mg, 95% yield, rr: >20:1) with 79% ee.

$^1\text{H}$  NMR ( $\text{CDCl}_3$ , 400 MHz)  $\delta$  7.18-7.46 (m, 10H), 6.76-6.80 (m, 1H), 4.96 (d,  $J = 15.6$  Hz, 1H), 4.88-4.97 (m, 1H), 4.72 (d,  $J = 14.4$  Hz, 1H), 4.68 (d,  $J = 14.4$  Hz, 1H), 3.88 (d,  $J = 15.6$  Hz, 1H), 2.98 (d,  $J = 14.4$  Hz, 1H), 2.93 (ddd,  $J = 16.6, 3.0, 3.0$  Hz, 1H), 2.28 (d,  $J = 16.6$  Hz, 1H), 1.52 (dq,  $J = 14.4, 6.4, 6.4$  Hz, 1H), 1.19 (d,  $J = 6.4$  Hz, 3H), 1.12 (d,  $J = 6.4$  Hz, 3H), 0.97 (d,  $J = 6.4$  Hz, 3H), 0.39 (d,  $J = 6.4$  Hz, 3H);

$^{13}\text{C}$  NMR ( $\text{CDCl}_3$ , 100 MHz)  $\delta$  174.5, 163.0, 155.9, 141.7, 137.1, 135.3, 132.6, 129.0, 128.5, 128.4, 128.1, 127.9, 127.7, 73.5, 67.9, 60.4, 45.4, 42.9, 42.2, 26.4, 22.4, 21.71, 21.67, 20.6;

IR (film) 3854, 2978, 1768, 1709, 1653, 1636, 1559, 1540, 1497, 1441, 1418, 1370, 1267, 1237, 1173, 1136, 1110, 1090, 755, 700, 668  $\text{cm}^{-1}$ ;

LRMS (APCI) calcd for  $\text{C}_{28}\text{H}_{32}\text{N}_2\text{O}_4\text{Na}$  ( $\text{M}+\text{Na}$ ) 483.2, found 483.2.

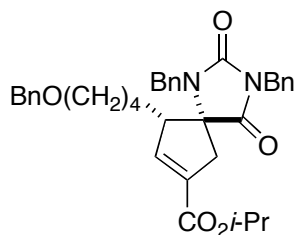

**(5R,9S)-Isopropyl 1,3-dibenzyl-9-(4-(benzyloxy)butyl)-2,4-dioxo-1,3-diazaspiro[4.4]non-7-ene-7-carboxylate (Table 2, entry 5).** The title compound was prepared according to General Procedure A from ( $\pm$ )-isopropyl 8-(benzyloxy)octa-2,3-dienoate (216 mg, 0.75 mmol) and 1,3-dibenzyl-5-methyleneimidazolidine-2,4-dione (146 mg, 0.50 mmol). After purification by column chromatography (2:1  $\rightarrow$  3:2

hexane/Et<sub>2</sub>O), the title compound was isolated as a colorless oil (262 mg, 90% yield, rr: >20:1) with 96% ee.

$[\alpha]_D^{24} = +63$  (c = 1.0, CHCl<sub>3</sub>).

SFC analysis of the product: Daicel CHIRALPAK IC-3 column; 20% 2-PrOH in CO<sub>2</sub>; 3.0 mL/min; retention times: 7.3 min (major), 9.0 min (minor).

The second run was performed with (*R*)-**1**. The ratio of regioisomers was determined to be 11:1 by <sup>1</sup>H NMR analysis of the unpurified mixture. The product was isolated as a colorless oil (271 mg, 94% yield, rr: >20:1) with 96% ee.

<sup>1</sup>H NMR (CDCl<sub>3</sub>, 400 MHz) δ 7.18-7.43 (m, 15H), 6.68-6.72 (m, 1H), 4.92-5.03 (m, 2H), 4.74 (d, *J* = 14.4 Hz, 1H), 4.72 (d, *J* = 14.4 Hz, 1H), 4.46 (d, *J* = 12.4 Hz, 1H), 4.43 (d, *J* = 12.4 Hz, 1H), 3.85 (d, *J* = 15.6 Hz, 1H), 3.28 (t, *J* = 6.0 Hz, 2H), 3.23-3.30 (br s, 1H), 3.00 (ddd, *J* = 17.0, 3.0, 3.0 Hz, 1H), 2.32 (d, *J* = 17.0 Hz, 1H), 1.25-1.50 (m, 4H), 1.23 (d, *J* = 6.0 Hz, 3H), 1.17 (d, *J* = 6.0 Hz, 3H), 1.02-1.15 (m, 2H);

<sup>13</sup>C NMR (CDCl<sub>3</sub>, 100 MHz) δ 174.4, 163.0, 155.9, 142.2, 138.4, 137.1, 136.0, 133.0, 128.62, 128.58, 128.5, 128.3, 128.1, 127.9, 127.8, 127.6, 127.5, 73.9, 72.8, 69.6, 68.0, 54.1, 45.3, 42.8, 40.4, 29.5, 26.4, 24.8, 21.8, 21.7;

IR (film) 2937, 2859, 1768, 1710, 1496, 1442, 1418, 1362, 1266, 1107, 738, 700 cm<sup>-1</sup>;

LRMS (APCI) calcd for C<sub>36</sub>H<sub>40</sub>N<sub>2</sub>NaO<sub>5</sub> (M+Na) 603.3, found 603.3.

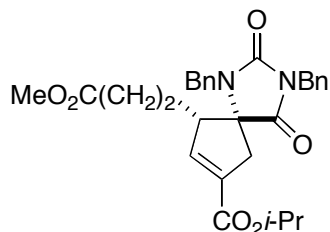

**(5*R*,9*S*)-Isopropyl 1,3-dibenzyl-9-(3-methoxy-3-oxopropyl)-2,4-dioxo-1,3-diazaspiro[4.4]non-7-ene-7-carboxylate (Table 2, entry 6).** The title compound was prepared according to General Procedure A from (±)-1-isopropyl-7-methyl hepta-2,3-dienedioate (159 mg, 0.75 mmol) and 1,3-dibenzyl-5-methyleneimidazolidine-2,4-dione (146 mg, 0.50 mmol). After purification by column chromatography (5:4 → 1:1 hexane/Et<sub>2</sub>O), the title compound was isolated as a colorless oil (223 mg, 88% yield, rr: >20:1) with 94% ee.

$[\alpha]_D^{24} = +74$  (c = 1.0, CHCl<sub>3</sub>).

HPLC analysis of the product: Daicel CHIRALPAK AD-H column; 10% 2-PrOH in hexane; 1.0 mL/min; retention times: 14.9 min (minor), 16.7 min (major).

The second run was performed with (*R*)-**1**. The ratio of regioisomers was determined to be 13:1 by <sup>1</sup>H NMR analysis of the unpurified mixture. The product was isolated as a colorless oil (220 mg, 87% yield, rr: >20:1) with 95% ee.

<sup>1</sup>H NMR (CDCl<sub>3</sub>, 400 MHz) δ 7.18-7.45 (m, 10H), 6.66-6.70 (m, 1H), 5.01 (d, *J* = 15.2 Hz, 1H), 4.97 (qq, *J* = 6.2, 6.2 Hz, 1H), 4.78 (d, *J* = 14.6 Hz, 1H), 4.73 (d, *J* = 14.6 Hz, 1H), 3.87 (d, *J* = 15.2 Hz, 1H), 3.62 (s, 3H), 3.25-3.30 (m, 1H), 2.99 (ddd, *J* = 16.8, 2.8, 2.8 Hz,

1H), 2.33 (d,  $J = 16.8$  Hz, 1H), 2.08-2.28 (m, 2H), 1.60-1.70 (m, 1H), 1.42-1.52 (m, 1H), 1.23 (d,  $J = 6.2$  Hz, 3H), 1.16 (d,  $J = 6.2$  Hz, 3H);

$^{13}\text{C}$  NMR ( $\text{CDCl}_3$ , 100 MHz)  $\delta$  174.0, 172.4, 162.8, 155.8, 141.1, 136.9, 135.8, 133.5, 128.7, 128.6, 128.4, 128.0, 127.9, 127.8, 73.8, 68.0, 53.1, 51.6, 45.3, 42.9, 40.5, 32.2, 21.73 (2C), 21.69;

IR (film) 2981, 1769, 1737, 1710, 1632, 1496, 1442, 1418, 1372, 1267, 1172, 1136, 1107, 1074, 1029, 923, 877, 831, 752, 701, 623  $\text{cm}^{-1}$ ;

LRMS (APCI) calcd for  $\text{C}_{29}\text{H}_{32}\text{N}_2\text{NaO}_6$  ( $\text{M}+\text{Na}$ ) 527.2, found 527.2.

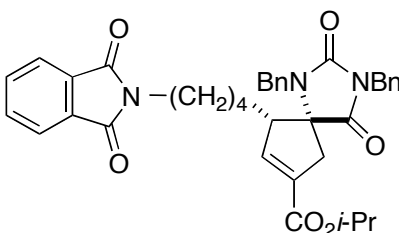

**(5R,9S)-Isopropyl 1,3-dibenzyl-9-(4-(1,3-dioxoisindolin-2-yl)butyl)-2,4-dioxo-1,3-diazaspiro[4.4]non-7-ene-7-carboxylate (Table 2, entry 7).** The title compound was prepared according to General Procedure A from ( $\pm$ )-isopropyl 8-(1,3-dioxoisindolin-2-yl)octa-2,3-dienoate (264 mg, 0.75 mmol) and 1,3-dibenzyl-5-methyleneimidazolidine-2,4-dione (146 mg, 0.50 mmol). After purification by column chromatography (5:2  $\rightarrow$  2:1 hexane/EtOAc), the title compound was isolated as a colorless oil (251 mg, 81% yield, rr: >20:1) with 97% ee.

$[\alpha]_{\text{D}}^{24} = +69$  ( $c = 1.0$ ,  $\text{CHCl}_3$ ).

HPLC analysis of the product: Daicel CHIRALPAK AD-H column; 25% 2-PrOH in hexane; 0.7 mL/min; retention times: 24.2 min (minor), 32.5 min (major).

The second run was performed with (*R*)-**1**. The ratio of regioisomers was determined to be 9:1 by  $^1\text{H}$  NMR analysis of the unpurified mixture. The product was isolated as white semi-solid (262 mg, 85% yield, rr: >20:1) with 98% ee.

$^1\text{H}$  NMR ( $\text{CDCl}_3$ , 400 MHz)  $\delta$  7.85-7.89 (m, 2H), 7.70-7.76 (m, 2H), 7.18-7.43 (m, 10H), 6.66-6.70 (m, 1H), 4.97 (d,  $J = 15.4$  Hz, 1H), 4.95-5.02 (m, 1H), 4.75 (d,  $J = 14.6$  Hz, 1H), 4.71 (d,  $J = 14.6$  Hz, 1H), 3.90 (d,  $J = 15.4$  Hz, 1H), 3.52 (t,  $J = 7.0$  Hz, 2H), 3.21-3.29 (m, 1H), 2.99 (ddd,  $J = 17.2, 3.0, 3.0$  Hz, 1H), 2.33 (d,  $J = 17.2$  Hz, 1H), 1.44-1.55 (m, 2H), 1.26-1.39 (m, 2H), 1.24 (d,  $J = 6.0$  Hz, 3H), 1.17 (d,  $J = 5.6$  Hz, 3H), 1.01-1.15 (m, 2H);

$^{13}\text{C}$  NMR ( $\text{CDCl}_3$ , 100 MHz)  $\delta$  174.3, 168.2, 163.0, 155.8, 142.0, 137.1, 135.9, 133.9, 133.0, 132.0, 128.64, 128.58, 128.50, 128.06, 127.96, 127.8, 123.2, 73.9, 68.0, 54.0, 45.3, 42.9, 40.4, 37.2, 28.3, 26.0, 25.1, 21.8, 21.7;

IR (film) 2980, 2939, 1771, 1709, 1653, 1635, 1559, 1540, 1496, 1442, 1419, 1397, 1373, 1269, 1139, 1107, 1075, 924, 754, 721, 701, 668, 624  $\text{cm}^{-1}$ ;

LRMS (APCI) calcd for  $\text{C}_{37}\text{H}_{37}\text{N}_3\text{NaO}_6$  ( $\text{M}+\text{Na}$ ) 642.3, found 642.3.

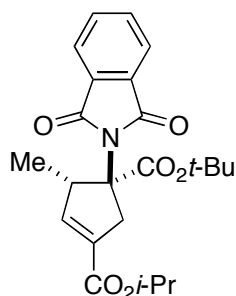

**(1S,5S)-1-tert-Butyl 3-isopropyl 1-(1,3-dioxoisindolin-2-yl)-5-methylcyclopent-3-ene-1,3-dicarboxylate (Table 3, entry 1).** The title compound was prepared according to General Procedure B from ( $\pm$ )-isopropyl penta-2,3-dienoate (140 mg, 1.00 mmol) and *tert*-butyl 2-(1,3-dioxoisindolin-2-yl)acrylate (137 mg, 0.50 mmol). After purification by column chromatography (3:1 hexane/ $\text{Et}_2\text{O}$ ), the title compound was isolated as a colorless oil (175 mg, 85% yield) with 98% ee.

$[\alpha]_D^{24} = +241$  ( $c = 1.0$ ,  $\text{CHCl}_3$ ).

HPLC analysis of the product: Daicel CHIRALPAK IC column; 30% 2-PrOH in hexane; 0.8 mL/min; retention times: 15.2 min (major), 24.1 min (minor).

The second run was performed with (*R*)-1. The ratio of diastereomers was determined to be >20:1 by  $^1\text{H}$  NMR analysis of the unpurified mixture. The product was isolated as a colorless oil (163 mg, 79% yield) with 98% ee.

$^1\text{H}$  NMR ( $\text{CDCl}_3$ , 400 MHz)  $\delta$  7.80-7.87(m, 2H), 7.71-7.77 (m, 2H), 6.60-6.64 (m, 1H), 5.06 (qq,  $J = 6.4, 6.4$  Hz, 1H), 4.62-4.71 (m, 1H), 3.92 (ddd,  $J = 17.2, 1.6, 0.8$  Hz, 1H), 2.89 (ddd,  $J = 17.2, 2.0, 2.0$  Hz, 1H), 1.41(s, 9H), 1.30 (d,  $J = 7.2$  Hz, 3H), 1.27 (d,  $J = 6.4$  Hz, 3H), 1.26 (d,  $J = 6.4$  Hz, 3H);

$^{13}\text{C}$  NMR ( $\text{CDCl}_3$ , 100 MHz)  $\delta$  168.8, 168.7, 163.9, 144.2, 134.0, 132.9, 131.7, 123.0, 82.6, 72.9, 67.6, 44.3, 43.1, 27.7, 21.77, 21.76, 15.3;

IR (film) 2979, 1779, 1717, 1685, 1653, 1636, 1617, 1576, 1559, 1540, 1521, 1507, 1457, 1437, 1419, 1371, 1266, 1154, 1105, 871, 846, 752, 720, 668  $\text{cm}^{-1}$ ;

LRMS (APCI) calcd for  $\text{C}_{23}\text{H}_{27}\text{NNaO}_6$  ( $\text{M}+\text{Na}$ ) 436.2, found 436.2.

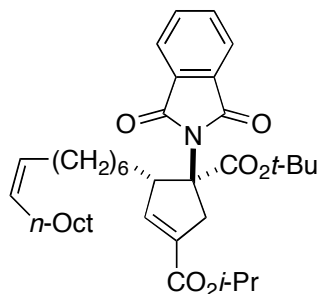

**(1S,5S)-(Z)-1-tert-Butyl 3-isopropyl 1-(1,3-dioxoisindolin-2-yl)-5-(hexadec-7-en-1-yl)cyclopent-3-ene-1,3-dicarboxylate (Table 3, entry 2).** The title compound was prepared according to General Procedure B from ( $\pm$ )-(*Z*)-isopropyl icoso-2,3,11-trienoate (349 mg, 1.00 mmol) and *tert*-butyl 2-(1,3-dioxoisindolin-2-yl)acrylate (137

mg, 0.50 mmol). After purification by column chromatography (5:4 → 1:1 hexane/EtOAc), the ee of the mixture was determined to be 98%. In order to obtain pure product, the mixture was further purified by semi-preparative HPLC (Daicel CHIRALPAK IA column, 20 mm x 250 mm (5.0 μm); 1% 2-PrOH in hexane; 20.0 mL/min; retention times: 9-12 min (major), 14-15 min (minor)). The title compound was isolated as a colorless oil (236 mg, 76% yield) with 98% ee.

$[\alpha]_D^{24} = +168$  (c = 1.0, CHCl<sub>3</sub>).

HPLC analysis of the product: Daicel CHIRALPAK IA column; 2% 2-PrOH in hexane; 1.0 mL/min; retention times: 13.0 min (major), 17.1 min (minor).

The second run was performed with (*R*)-**1**. The ratio of diastereomers was determined to be >20:1 by <sup>1</sup>H NMR analysis of the unpurified mixture. The ee of the unpurified mixture was 98%. The product was isolated as a colorless oil (212 mg, 68% yield) with >99% ee.

<sup>1</sup>H NMR (CDCl<sub>3</sub>, 400 MHz) δ 7.80-7.86 (m, 2H), 7.70-7.76 (m, 2H), 6.75-6.80 (m, 1H), 5.30-5.42 (m, 2H), 5.07 (qq, *J* = 6.2, 6.2 Hz, 1H), 4.44 (d, *J* = 11.2 Hz, 1H), 3.93 (d, *J* = 17.0 Hz, 1H), 2.87 (ddd, *J* = 17.0, 2.0, 2.0 Hz, 1H), 2.00-2.08 (m, 4H), 1.80-1.90 (m, 1H), 1.50-1.68 (m, 2H), 1.40 (s, 9H), 1.28 (d, *J* = 6.2 Hz, 3H), 1.27 (d, *J* = 6.2 Hz, 3H), 1.22-1.46 (m, 19H), 0.88 (t, *J* = 6.8 Hz, 3H);

<sup>13</sup>C NMR (CDCl<sub>3</sub>, 100 MHz) δ 169.0, 168.7, 164.0, 142.2, 134.0, 133.6, 131.7, 129.9, 129.7, 123.1, 82.5, 72.8, 67.6, 49.8, 43.3, 31.8, 30.4, 29.69, 29.65, 29.63, 29.4, 29.24 (2C), 29.18, 28.3, 27.7, 27.14, 27.13, 22.6, 21.82, 21.80, 14.0;

IR (film) 2978, 2926, 2855, 1778, 1719, 1653, 1616, 1559, 1540, 1507, 1467, 1371, 1324, 1263, 1154, 1106, 1037, 925, 871, 848, 792, 720, 666 cm<sup>-1</sup>;

LRMS (APCI) calcd for C<sub>38</sub>H<sub>55</sub>NNaO<sub>6</sub> (M+Na) 644.4, found 644.3.

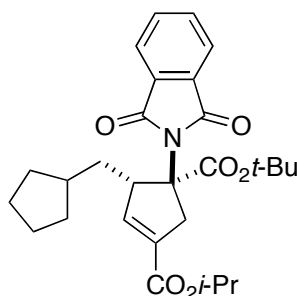

**(1*S*,5*S*)-1-*tert*-Butyl 3-isopropyl 5-(cyclopentylmethyl)-1-(1,3-dioxoisindolin-2-yl)cyclopent-3-ene-1,3-dicarboxylate (Table 3, entry 3).** The title compound was prepared according to General Procedure B from (±)-isopropyl 5-cyclopentylpenta-2,3-dienoate (208 mg, 1.00 mmol) and *tert*-butyl 2-(1,3-dioxoisindolin-2-yl)acrylate (137 mg, 0.50 mmol). After purification by column chromatography (3:1 → 2:1 hexane/Et<sub>2</sub>O), the ee of the mixture was determined to be 98%. In order to obtain pure product, the mixture was further purified by semi-preparative HPLC (Daicel CHIRALPAK IC column, 20 mm x 250 mm (5.0 μm); 20% 2-PrOH in hexane; 20.0 mL/min; retention

times: 10-15 min (major), 22-23 min (minor)). The title compound was isolated as a colorless oil (209 mg, 87% yield) with 98% ee.

$[\alpha]_D^{24} = +238$  ( $c = 1.0$ ,  $\text{CHCl}_3$ ).

HPLC analysis of the product: Daicel CHIRALPAK IC column; 30% 2-PrOH in hexane; 1.0 mL/min; retention times: 12.8 min (major), 18.5 min (minor).

The second run was performed with (R)-1. The ee of the unpurified mixture was 98%. The ratio of diastereomers was determined to be >20:1 by  $^1\text{H}$  NMR analysis of the unpurified mixture. The product was isolated as a colorless oil (204 mg, 85% yield) with 98% ee.

$^1\text{H}$  NMR ( $\text{CDCl}_3$ , 400 MHz)  $\delta$  7.80-7.86 (m, 2H), 7.71-7.76 (m, 2H), 6.81-6.86 (m, 1H), 5.07 (qq,  $J = 6.0$  Hz, 1H), 4.59 (d,  $J = 11.2$  Hz, 1H), 3.93 (d,  $J = 17.0$  Hz, 1H), 2.86 (d,  $J = 17.0$  Hz, 1H), 1.12-2.05 (m, 11H), 1.40 (s, 9H), 1.28 (d,  $J = 6.0$  Hz, 3H), 1.27 (d,  $J = 6.0$  Hz, 3H);

$^{13}\text{C}$  NMR ( $\text{CDCl}_3$ , 100 MHz)  $\delta$  169.0, 168.7, 164.0, 142.5, 134.0, 133.4, 131.7, 123.0, 82.5, 73.1, 67.6, 48.6, 43.1, 38.7, 36.0, 33.7, 31.3, 27.7, 25.0, 24.9, 21.80, 21.78;

IR (film) 2978, 2946, 2869, 1778, 1717, 1653, 1616, 1469, 1456, 1371, 1326, 1267, 1155, 1104, 1041, 926, 871, 847, 793, 754, 720, 667  $\text{cm}^{-1}$ ;

LRMS (APCI) calcd for  $\text{C}_{28}\text{H}_{35}\text{NNaO}_6$  ( $\text{M}+\text{Na}$ ) 504.2, found 504.2.

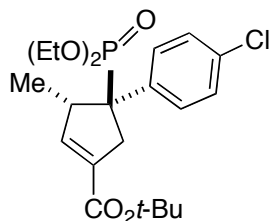

**(3S,4S)-tert-Butyl 4-(4-chlorophenyl)-4-(diethoxyphosphoryl)-3-methylcyclopent-1-enecarboxylate (Table 4, entry 1).** The title compound was prepared according to General Procedure B from ( $\pm$ )-tert-butyl penta-2,3-dienoate (154 mg, 1.00 mmol) and diethyl (1-(4-chlorophenyl)vinyl)phosphonate (137 mg, 0.50 mmol). After purification by column chromatography (3:2  $\rightarrow$  1:1 toluene/EtOAc), the title compound was isolated as a colorless oil (173 mg, 81% yield) with 99% ee.

$[\alpha]_D^{24} = +115$  ( $c = 1.0$ ,  $\text{CHCl}_3$ ).

HPLC analysis of the product: Daicel CHIRALPAK AD-H column; 10% 2-PrOH in hexane; 1.0 mL/min; retention times: 8.9 min (minor), 24.1 min (major).

The second run was performed with (R)-1. The product was isolated as a colorless oil (177 mg, 83% yield) with 99% ee.

$^1\text{H}$  NMR ( $\text{CDCl}_3$ , 400 MHz)  $\delta$  7.40 (dd,  $J = 8.8, 2.6$  Hz, 2H), 7.30 (d,  $J = 8.8$  Hz, 2H), 6.60-6.65 (m, 1H), 3.95-4.10 (m, 2H), 3.78-3.90 (m, 1H), 3.60-3.73 (m, 1H), 3.51-3.61 (m, 1H), 3.31 (dd,  $J = 17.0, 17.0$  Hz, 1H), 3.13 (dddd,  $J = 24.0, 17.0, 2.0, 2.0$  Hz, 1H), 1.52 (s, 9H), 1.24 (t,  $J = 7.2$  Hz, 3H), 1.06 (t,  $J = 7.2$  Hz, 3H), 0.76 (d,  $J = 7.2$  Hz, 3H);

$^{13}\text{C}$  NMR ( $\text{CDCl}_3$ , 100 MHz)  $\delta$  164.0, 145.3 (d,  $J = 3$  Hz), 136.0 (d,  $J = 5$  Hz), 134.7 (d,  $J = 2$  Hz), 132.7 (d,  $J = 3$  Hz), 131.0 (d,  $J = 7$  Hz), 127.8 (d,  $J = 2$  Hz), 80.4, 62.7 (d,  $J = 8$  Hz), 62.2 (d,  $J = 7$  Hz), 53.9 (d,  $J = 135$  Hz), 44.5 (d,  $J = 2$  Hz), 36.7 (d,  $J = 4$  Hz), 28.0, 16.14 (d,  $J = 3$  Hz), 16.08 (d,  $J = 3$  Hz), 15.8 (d,  $J = 10$  Hz);

$^{31}\text{P}$  NMR ( $\text{CDCl}_3$ , 162 MHz)  $\delta$  30.8;

IR (film) 2980, 2931, 1708, 1637, 1559, 1540, 1494, 1457, 1392, 1368, 1355, 1278, 1243, 1169, 1123, 1095, 1054, 1026, 965, 847, 793, 749, 668, 581  $\text{cm}^{-1}$ ;

LRMS (APCI) calcd for  $\text{C}_{21}\text{H}_{30}\text{ClNaO}_5\text{P}$  ( $\text{M}+\text{Na}$ ) 451.1, found 451.1.

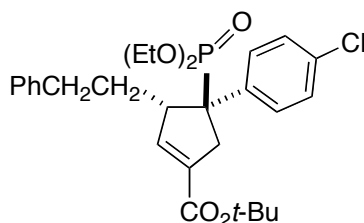

**(3*S*,4*S*)-*tert*-Butyl 4-(4-chlorophenyl)-4-(diethoxyphosphoryl)-3-phenethylcyclopent-1-enecarboxylate (Table 4, entry 2).** The title compound was prepared according to General Procedure B from ( $\pm$ )-*tert*-butyl 6-phenylhexa-2,3-dienoate (244 mg, 1.00 mmol) and diethyl (1-(4-chlorophenyl)vinyl)phosphonate (137 mg, 0.50 mmol). After purification by column chromatography (1:5  $\rightarrow$  1:6 hexane/ $\text{Et}_2\text{O}$ ), the title compound was isolated as a colorless oil (212 mg, 82% yield) with 96% ee.

$[\alpha]_D^{23} = +93$  ( $c = 1.0$ ,  $\text{CHCl}_3$ ).

HPLC analysis of the product: Daicel CHIRALPAK AD-H column; 10% 2-PrOH in hexane; 1.0 mL/min; retention times: 8.5 min (minor), 22.2 min (major).

The second run was performed with (*R*)-1. The product was isolated as a colorless oil (198 mg, 76% yield) with 97% ee.

$^1\text{H}$  NMR ( $\text{CDCl}_3$ , 400 MHz)  $\delta$  7.42 (dd,  $J = 8.8, 2.0$  Hz, 2H), 7.28 (d,  $J = 8.8$  Hz, 2H), 7.23 (dd,  $J = 7.6, 7.2$  Hz, 2H), 7.12 (t,  $J = 7.2$  Hz, 1H), 6.99 (d,  $J = 7.6$  Hz, 2H), 6.76-6.82 (m, 1H), 3.92-4.05 (m, 2H), 3.77-3.88 (m, 1H), 3.50-3.65 (m, 2H), 3.33 (dd,  $J = 17.2, 17.2$  Hz, 1H), 3.15 (dd,  $J = 22.4, 16.8$  Hz, 1H), 2.46-2.55 (m, 2H), 1.70-1.80 (m, 1H), 1.54 (s, 9H), 1.21 (t,  $J = 7.0$  Hz, 3H), 1.10-1.20 (m, 1H), 1.04 (t,  $J = 7.0$  Hz, 3H);

$^{13}\text{C}$  NMR ( $\text{CDCl}_3$ , 100 MHz)  $\delta$  163.8, 143.1 (d,  $J = 3$  Hz), 141.3, 136.1 (d,  $J = 3$  Hz), 135.9 (d,  $J = 4$  Hz), 132.7 (d,  $J = 4$  Hz), 130.8 (d,  $J = 7$  Hz), 128.2, 128.1, 127.8 (d,  $J = 3$  Hz), 125.8, 80.6, 62.7 (d,  $J = 7$  Hz), 62.2 (d,  $J = 7$  Hz), 53.9 (d,  $J = 135$  Hz), 49.2 (d,  $J = 2$  Hz), 37.8 (d,  $J = 4$  Hz), 33.1, 32.6 (d,  $J = 8$  Hz), 28.0, 16.1 (d,  $J = 3$  Hz), 16.0 (d,  $J = 2$  Hz);

$^{31}\text{P}$  NMR ( $\text{CDCl}_3$ , 162 MHz)  $\delta$  30.6;

IR (film) 2979, 1772, 1734, 1706, 1685, 1653, 1636, 1617, 1576, 1559, 1540, 1521, 1507, 1495, 1457, 1393, 1368, 1243, 1168, 1096, 1052, 1026, 963, 848, 750, 700, 668, 578  $\text{cm}^{-1}$ ;

LRMS (APCI) calcd for  $\text{C}_{28}\text{H}_{36}\text{ClNaO}_5\text{P}$  ( $\text{M}+\text{Na}$ ) 541.2, found 541.2.



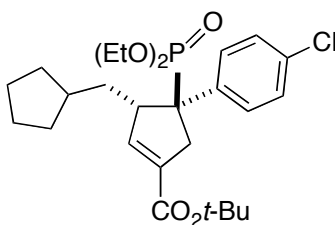

**(3*S*,4*S*)-tert-Butyl 4-(4-chlorophenyl)-3-(cyclopentylmethyl)-4-(diethoxyphosphoryl)cyclopent-1-enecarboxylate (Table 4, entry 3).** The title compound was prepared according to General Procedure B from ( $\pm$ )-tert-butyl 5-cyclopentylpenta-2,3-dienoate (222 mg, 1.00 mmol) and diethyl (1-(4-chlorophenyl)vinyl)phosphonate (137 mg, 0.50 mmol). After purification by column chromatography (1:4 hexane/Et<sub>2</sub>O), the title compound was isolated as a colorless oil (215 mg, 86% yield) with 96% ee.

$[\alpha]_D^{23} = +118$  ( $c = 1.0$ , CHCl<sub>3</sub>).

HPLC analysis of the product: Daicel CHIRALPAK AD-H column; 10% 2-PrOH in hexane; 1.0 mL/min; retention times: 6.7 min (minor), 12.1 min (major).

The second run was performed with (*R*)-**1**. The product was isolated as a colorless oil (216 mg, 87% yield) with 97% ee.

<sup>1</sup>H NMR (CDCl<sub>3</sub>, 400 MHz)  $\delta$  7.40 (dd,  $J = 8.8, 2.4$  Hz, 2H), 7.29 (d,  $J = 8.8$  Hz, 2H), 6.76-6.82 (m, 1H), 3.95-4.10 (m, 2H), 3.80-3.90 (m, 1H), 3.52-3.64 (m, 2H), 3.30 (dd,  $J = 17.0, 17.0$  Hz, 1H), 3.11 (dd,  $J = 22.8, 16.4$  Hz, 1H), 1.43-1.90 (m, 8H), 1.53 (s, 9H), 1.25 (t,  $J = 7.0$  Hz, 3H), 1.05-1.15 (m, 1H), 1.07 (t,  $J = 7.0$  Hz, 3H), 0.80-0.95 (m, 2H);

<sup>13</sup>C NMR (CDCl<sub>3</sub>, 100 MHz)  $\delta$  164.0, 144.2 (d,  $J = 3$  Hz), 136.1 (d,  $J = 4$  Hz), 135.5 (d,  $J = 3$  Hz), 132.6 (d,  $J = 3$  Hz), 131.0 (d,  $J = 6$  Hz), 127.8 (d,  $J = 2$  Hz), 80.5, 62.6 (d,  $J = 7$  Hz), 62.2 (d,  $J = 7$  Hz), 54.3 (d,  $J = 135$  Hz), 48.8 (d,  $J = 1$  Hz), 37.9, 37.4 (d,  $J = 4$  Hz), 37.1 (d,  $J = 8$  Hz), 33.7, 31.7, 28.1, 25.0, 24.9, 16.2 (d,  $J = 5$  Hz), 16.1 (d,  $J = 4$  Hz);

<sup>31</sup>P NMR (CDCl<sub>3</sub>, 162 MHz)  $\delta$  30.9;

IR (film) 2979, 2950, 2868, 1708, 1637, 1493, 1456, 1392, 1368, 1281, 1244, 1169, 1118, 1095, 1057, 1027, 963, 847, 791, 751, 668, 583 cm<sup>-1</sup>;

LRMS (APCI) calcd for C<sub>26</sub>H<sub>38</sub>ClNaO<sub>5</sub>P (M+Na) 519.2, found 519.2.

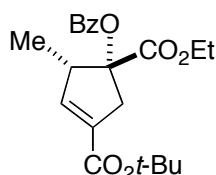

**(1*R*,5*S*)-3-tert-butyl 1-ethyl 1-(benzoyloxy)-5-methylcyclopent-3-ene-1,3-dicarboxylate (Table 5, entry 1).** The title compound was prepared according to General Procedure B from ( $\pm$ )-tert-butyl penta-2,3-dienoate (154 mg, 1.00 mmol) and 3-ethoxy-3-oxoprop-1-en-2-yl benzoate (110 mg, 0.50 mmol). After purification by

column chromatography (6:1 hexane/Et<sub>2</sub>O), the title compound was isolated as a colorless oil (145 mg, 78% yield, dr: 13:1) with 95% ee.

$[\alpha]_D^{23} = -23$  (c = 1.0, CHCl<sub>3</sub>).

HPLC analysis of the product: Daicel CHIRALPAK AD-H column; 1% 2-PrOH in hexane; 1.0 mL/min; retention times: 19.1 min (minor), 20.8 min (major).

The second run was performed with (R)-1. The ratio of diastereomers was determined to be 10:1 by <sup>1</sup>H NMR analysis of the unpurified mixture. The product was isolated as a colorless oil (151 mg, 80% yield, dr: 11:1) with 96% ee.

<sup>1</sup>H NMR (CDCl<sub>3</sub>, 400 MHz) δ 8.04 (d, J = 7.2 Hz, 2H), 7.59 (t, J = 7.6 Hz, 1H), 7.45 (dd, J = 7.6, 7.2 Hz, 2H), 6.49-6.54 (m, 1H), 4.23 (q, J = 7.0 Hz, 2H), 3.65 (ddd, J = 18.4, 2.0, 2.0 Hz, 1H), 3.33-3.43 (m, 1H), 3.06 (ddd, J = 18.4, 1.0, 1.0 Hz, 1H), 1.48 (s, 9H), 1.34 (d, J = 7.6 Hz, 3H), 1.23 (t, J = 7.0 Hz, 3H);

<sup>13</sup>C NMR (CDCl<sub>3</sub>, 100 MHz) δ 171.0, 165.5, 163.6, 142.6, 134.0, 133.3, 129.72, 129.67, 128.4, 86.4, 80.7, 61.5, 48.5, 41.6, 28.0, 14.0, 13.0;

IR (film) 2979, 2937, 1745, 1720, 1637, 1602, 1452, 1393, 1368, 1316, 1284, 1175, 1138, 1113, 1037, 849, 746, 713 cm<sup>-1</sup>;

LRMS (APCI) calcd for C<sub>21</sub>H<sub>26</sub>NaO<sub>6</sub> (M+Na) 397.2, found 397.1.

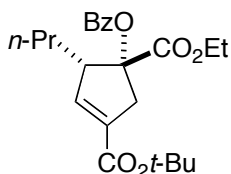

**(1R,5S)-3-tert-Butyl 1-ethyl 1-(benzyloxy)-5-propylcyclopent-3-ene-1,3-dicarboxylate (Table 5, entry 2).** The title compound was prepared according to General Procedure B from (±)-tert-butyl hepta-2,3-dienoate (182 mg, 1.00 mmol) and 3-ethoxy-3-oxoprop-1-en-2-yl benzoate (110 mg, 0.50 mmol). After purification by column chromatography (7:1 hexane/Et<sub>2</sub>O), the title compound was isolated as a colorless oil (160 mg, 80% yield, dr: 14:1) with 90% ee.

$[\alpha]_D^{23} = -35$  (c = 1.0, CHCl<sub>3</sub>).

HPLC analysis of the product after deprotection of the tert-Bu ester with trifluoroacetic acid: Daicel CHIRALPAK IC column; 10% 2-PrOH in hexane; 1.0 mL/min; retention times: 21.6 min (minor), 39.1 min (major).

The second run was performed with (R)-1. The ratio of diastereomers was determined to be 11:1 by <sup>1</sup>H NMR analysis of the unpurified mixture. The product was isolated as a colorless oil (180 mg, 90% yield, dr: 14:1) with 88% ee.

<sup>1</sup>H NMR (CDCl<sub>3</sub>, 400 MHz) δ 8.02 (d, J = 8.0 Hz, 2H), 7.59 (t, J = 7.6 Hz, 1H), 7.46 (dd, J = 8.0, 7.6 Hz, 2H), 6.60-6.65 (m, 1H), 4.24 (q, J = 7.0 Hz, 2H), 3.70 (ddd, J = 18.0, 2.0, 2.0 Hz, 1H), 3.16-3.22 (m, 1H), 3.04 (ddd, J = 18.0, 1.5, 1.5 Hz, 1H), 1.81-1.91 (m, 1H), 1.65-1.75 (m, 1H), 1.53-1.64 (m, 1H), 1.41-1.52 (m, 1H), 1.48 (s, 9H), 1.23 (t, J = 7.0 Hz, 3H), 0.99 (t, J = 7.0 Hz, 3H);

$^{13}\text{C}$  NMR ( $\text{CDCl}_3$ , 100 MHz)  $\delta$  171.2, 165.4, 163.7, 140.8, 134.6, 133.3, 129.8, 129.7, 128.4, 86.6, 80.7, 61.6, 53.9, 41.9, 30.2, 28.0, 21.0, 14.1, 14.0;

IR (film) 2977, 2935, 2873, 1744, 1722, 1641, 1602, 1585, 1452, 1393, 1368, 1316, 1285, 1175, 1138, 1112, 1097, 1069, 1048, 1026, 902, 849, 798, 740, 712, 687  $\text{cm}^{-1}$ ;

LRMS (APCI) calcd for  $\text{C}_{23}\text{H}_{30}\text{NaO}_6$  ( $\text{M}+\text{Na}$ ) 425.2, found 425.2.

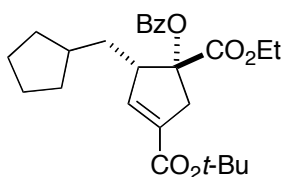

**(1R,5S)-3-tert-Butyl 1-ethyl 1-(benzyloxy)-5-(cyclopentylmethyl)cyclopent-3-ene-1,3-dicarboxylate (Table 5, entry 3).** The title compound was prepared according to General Procedure B from ( $\pm$ )-tert-butyl 5-cyclopentylpenta-2,3-dienoate (222 mg, 1.00 mmol) and 3-ethoxy-3-oxoprop-1-en-2-yl benzoate (110 mg, 0.50 mmol). After purification by column chromatography (7:1 hexane/ $\text{Et}_2\text{O}$ ), the title compound was isolated as a colorless oil (182 mg, 82% yield, dr: 17:1) with 85% ee.

$[\alpha]_D^{24} = -43$  ( $c = 1.0$ ,  $\text{CHCl}_3$ ).

HPLC analysis of the product: Daicel CHIRALPAK IA column; 1% 2-PrOH in hexane; 1.0 mL/min; retention times: 9.1 min (major), 12.8 min (minor).

The second run was performed with (*R*)-1. The ratio of diastereomers was determined to be 12:1 by  $^1\text{H}$  NMR analysis of the unpurified mixture. The product was isolated as a colorless oil (186 mg, 84% yield, dr: 17:1) with 87% ee.

$^1\text{H}$  NMR ( $\text{CDCl}_3$ , 400 MHz)  $\delta$  8.02 (d,  $J = 7.4$  Hz, 2H), 7.58 (t,  $J = 7.4$  Hz, 1H), 7.46 (dd,  $J = 7.4, 7.4$  Hz, 2H), 6.62-6.67 (m, 1H), 4.18-4.32 (m, 2H), 3.71 (d,  $J = 18.0$  Hz, 1H), 3.17-3.25 (m, 1H), 3.05 (d,  $J = 18.0$  Hz, 1H), 1.50-2.05 (m, 9H), 1.48 (s, 9H), 1.24 (t,  $J = 7.0$  Hz, 3H), 1.05-1.20 (m, 2H);

$^{13}\text{C}$  NMR ( $\text{CDCl}_3$ , 100 MHz)  $\delta$  171.0, 165.3, 163.6, 141.0, 134.5, 133.2, 129.8, 129.6, 128.3, 86.8, 80.6, 61.5, 53.4, 41.8, 38.1, 34.2, 33.4, 32.2, 28.0, 25.1, 25.0, 14.0;

IR (film) 2946, 2868, 1744, 1723, 1638, 1602, 1452, 1392, 1368, 1316, 1285, 1175, 1116, 1069, 1027, 850, 736, 712  $\text{cm}^{-1}$ ;

LRMS (APCI) calcd for  $\text{C}_{26}\text{H}_{34}\text{NaO}_6$  ( $\text{M}+\text{Na}$ ) 465.2, found 465.2.

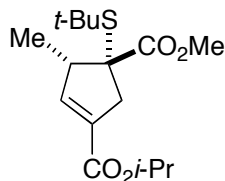

**(1R,5S)-3-Isopropyl 1-methyl 1-(tert-butylthio)-5-methylcyclopent-3-ene-1,3-dicarboxylate (Table 6, entry 1).** The title compound was prepared according to

General Procedure B from ( $\pm$ )-isopropyl penta-2,3-dienoate (140 mg, 1.00 mmol) and methyl 2-(*tert*-butylthio)acrylate (87 mg, 0.50 mmol). After purification by column chromatography (6:1 hexane/ $\text{Et}_2\text{O}$ ), the title compound was isolated as a colorless oil (102 mg, 65% yield, dr: 8:1) with 98% ee.

$[\alpha]_{\text{D}}^{25} = +182$  ( $c = 1.0$ ,  $\text{CHCl}_3$ ).

HPLC analysis of the product: Daicel CHIRALPAK IA column; 1% 2-PrOH in hexane; 1.0 mL/min; retention times: 7.1 min (major), 8.4 min (minor).

The second run was performed with (*R*)-1. The ratio of diastereomers was determined to be 7:1 by  $^1\text{H}$  NMR analysis of the unpurified mixture. The product was isolated as a colorless oil (112 mg, 71% yield, dr: 9:1) with 98% ee.

$^1\text{H}$  NMR ( $\text{CDCl}_3$ , 400 MHz)  $\delta$  6.57-6.62 (m, 1H), 5.07 (qq,  $J = 6.4, 6.4$  Hz, 1H), 3.78 (s, 3H), 3.57 (ddd,  $J = 17.3, 2.0, 2.0$  Hz, 1H), 3.12 (d,  $J = 17.3$  Hz, 1H), 2.88-2.97 (m, 1H), 1.36 (s, 9H), 1.28 (d,  $J = 6.4$  Hz, 3H), 1.27 (d,  $J = 6.4$  Hz, 3H), 1.00 (d,  $J = 7.2$  Hz, 3H);

$^{13}\text{C}$  NMR ( $\text{CDCl}_3$ , 100 MHz)  $\delta$  173.4, 164.1, 144.0, 133.1, 67.6, 61.5, 52.0, 51.4, 46.6, 40.1, 31.9, 21.78, 21.76, 14.6;

IR (film) 2980, 1717, 1685, 1653, 1636, 1559, 1540, 1521, 1507, 1457, 1365, 1261, 1159, 1097, 936, 744, 668  $\text{cm}^{-1}$ ;

LRMS (APCI) calcd for  $\text{C}_{16}\text{H}_{26}\text{O}_4\text{SNa}$  ( $\text{M}+\text{Na}$ ) 337.2, found 337.2.

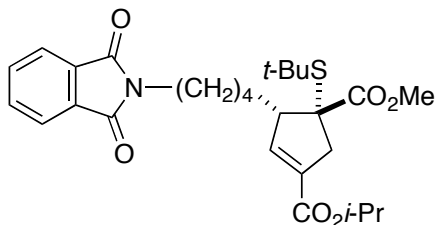

**(1*R*,5*S*)-3-Isopropyl 1-methyl 1-(*tert*-butylthio)-5-(4-(1,3-dioxoisindolin-2-yl)butyl)cyclopent-3-ene-1,3-dicarboxylate (Table 6, entry 2).** The title compound was prepared according to General Procedure B from ( $\pm$ )-isopropyl 8-(1,3-dioxoisindolin-2-yl)octa-2,3-dienoate (327 mg, 1.00 mmol) and methyl 2-(*tert*-butylthio)acrylate (87 mg, 0.50 mmol). After purification by column chromatography (5:2 hexane/ $\text{Et}_2\text{O}$ ), the title compound was isolated as a colorless oil (187 mg, 75% yield, dr: 14:1) with 96% ee.

$[\alpha]_{\text{D}}^{24} = +113$  ( $c = 1.0$ ,  $\text{CHCl}_3$ ).

HPLC analysis of the product: Daicel CHIRALPAK IA column; 4% 2-PrOH in hexane; 1.0 mL/min; retention times: 17.8 min (major), 23.7 min (minor).

The second run was performed with (*R*)-1. The ratio of diastereomers was determined to be 6:1 by  $^1\text{H}$  NMR analysis of the unpurified mixture. The product was isolated as a colorless oil (203 mg, 81% yield, dr: 14:1) with 97% ee.

$^1\text{H}$  NMR ( $\text{CDCl}_3$ , 400 MHz)  $\delta$  7.81-7.86 (m, 2H), 7.70-7.75 (m, 2H), 6.70 (s, 1H), 5.07 (qq,  $J = 6.0, 6.0$  Hz, 1H), 3.76 (s, 3H), 3.66 (t,  $J = 7.2$  Hz, 2H), 3.52 (d,  $J = 17.2$  Hz, 1H), 3.09

(d,  $J = 17.2$  Hz, 1H), 2.76-2.85 (m, 1H), 1.58-1.73 (m, 3H), 1.34 (s, 9H), 1.28 (d,  $J = 6.0$  Hz, 3H), 1.27 (d,  $J = 6.0$  Hz, 3H), 1.18-1.41 (m, 3H);

$^{13}\text{C}$  NMR ( $\text{CDCl}_3$ , 100 MHz)  $\delta$  173.3, 168.2, 164.0, 142.3, 134.5, 133.8, 132.0, 123.1, 67.7, 61.8, 56.3, 52.1, 46.7, 40.7, 37.6, 31.9, 29.4, 28.5, 24.7, 21.79, 21.78;

IR (film) 2947, 1773, 1713, 1636, 1559, 1466, 1437, 1397, 1373, 1261, 1161, 1104, 753, 721, 668  $\text{cm}^{-1}$ ;

LRMS (APCI) calcd for  $\text{C}_{27}\text{H}_{35}\text{NNaO}_6\text{S}$  ( $\text{M}+\text{Na}$ ) 524.2, found 524.2.

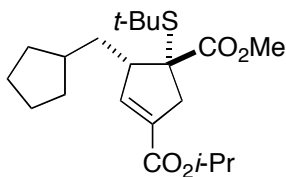

**(1R,5S)-3-Isopropyl 1-methyl 1-(tert-butylthio)-5-(cyclopentylmethyl)cyclopent-3-ene-1,3-dicarboxylate (Table 6, entry 3).** The title compound was prepared according to General Procedure B from ( $\pm$ )-isopropyl 5-cyclopentylpenta-2,3-dienoate (208 mg, 1.00 mmol) and methyl 2-(tert-butylthio)acrylate (87 mg, 0.50 mmol). After purification by column chromatography (7:1 hexane/ $\text{Et}_2\text{O}$ ), the title compound was isolated as a colorless oil (170 mg, 89% yield, dr: 8:1) with 97% ee.

$[\alpha]_{\text{D}}^{24} = +187$  ( $c = 1.0$ ,  $\text{CHCl}_3$ ).

HPLC analysis of the product: Daicel CHIRALPAK AD-H column; 1% 2-PrOH in hexane; 1.0 mL/min; retention times: 6.2 min (major), 7.4 min (minor).

The second run was performed with (*R*)-1. The ratio of diastereomers was determined to be 7:1 by  $^1\text{H}$  NMR analysis of the unpurified mixture. The product was isolated as a colorless oil (174 mg, 91% yield, dr: 8:1) with 97% ee.

$^1\text{H}$  NMR ( $\text{CDCl}_3$ , 400 MHz)  $\delta$  6.76 (s, 1H), 5.07 (qq,  $J = 6.0, 6.0$  Hz, 1H), 3.76 (s, 3H), 3.53 (ddd,  $J = 16.8, 2.0, 2.0$  Hz, 1H), 3.10 (d,  $J = 16.8$  Hz, 1H), 2.79-2.88 (m, 1H), 1.38-1.85 (m, 8H), 1.35 (s, 9H), 1.28 (d,  $J = 6.0$  Hz, 3H), 1.27 (d,  $J = 6.0$  Hz, 3H), 1.08-1.33 (m, 3H);

$^{13}\text{C}$  NMR ( $\text{CDCl}_3$ , 100 MHz)  $\delta$  173.4, 164.1, 143.0, 134.1, 67.7, 62.2, 55.6, 52.0, 46.6, 40.4, 37.9, 35.8, 33.7, 32.0, 31.5, 25.0, 24.9, 21.82, 21.80;

IR (film) 2949, 2868, 1726, 1712, 1640, 1461, 1452, 1366, 1260, 1231, 1160, 1107, 938, 739  $\text{cm}^{-1}$ ;

LRMS (APCI) calcd for  $\text{C}_{21}\text{H}_{34}\text{NaO}_4\text{S}$  ( $\text{M}+\text{Na}$ ) 405.2, found 405.2.

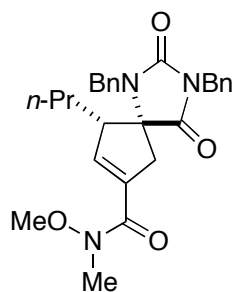

**(5*R*,9*S*)-1,3-dibenzyl-*N*-methoxy-*N*-methyl-2,4-dioxo-9-propyl-1,3-diazaspiro[4.4]non-7-ene-7-carboxamide (eq 3).** The title compound was prepared according to General Procedure B from ( $\pm$ )-*N*-methoxy-*N*-methylhepta-2,3-dienamide (169 mg, 1.00 mmol) and 1,3-dibenzyl-5-methyleneimidazolidine-2,4-dione (146 mg, 0.50 mmol). After purification by reverse-phase column chromatography using gradient elution (10% to 90% MeCN/water), the title compound was isolated as a colorless oil (195 mg, 84% yield, rr: >20:1, dr: >20:1) with 94% ee.

$[\alpha]_D^{24} = +45$  (c = 1.0, CHCl<sub>3</sub>).

HPLC analysis of the product: Daicel CHIRALPAK IB-3 column; 15% 2-PrOH in hexane; 0.9 mL/min; retention times: 10.9 min (major), 18.2 min (minor).

The second run was performed with (*R*)-1. The ratios of regioisomers and diastereomers were both 17:1, according to <sup>1</sup>H NMR analysis of the unpurified mixture. The product was isolated as a colorless oil (200 mg, 86% yield, rr: >20:1, dr: >20:1) with 94% ee.

<sup>1</sup>H NMR (CDCl<sub>3</sub>, 400 MHz)  $\delta$  7.21-7.45 (m, 10H), 6.62-6.67 (m, 1H), 4.93 (d, *J* = 15.2 Hz, 1H), 4.77 (d, *J* = 14.4 Hz, 1H), 4.72 (d, *J* = 14.4 Hz, 1H), 3.98 (d, *J* = 15.2 Hz, 1H), 3.39 (s, 3H), 3.15-3.28 (m, 2H), 3.16 (s, 3H), 2.42 (d, *J* = 16.8 Hz, 1H), 0.98-1.30 (m, 4H), 0.71 (t, *J* = 6.8 Hz, 3H);

<sup>13</sup>C NMR (CDCl<sub>3</sub>, 100 MHz)  $\delta$  174.6, 164.8, 155.9, 142.0, 137.4, 135.9, 133.5, 128.6 (2C), 128.4, 128.3, 127.9, 127.6, 74.3, 61.2, 53.1, 45.2, 42.8, 42.1, 32.7, 28.8, 21.1, 13.8;

IR (film) 2959, 2933, 2872, 1766, 1709, 1637, 1607, 1496, 1443, 1418, 1381, 1359, 1205, 1136, 1075, 977, 752, 701, 624, 565 cm<sup>-1</sup>;

LRMS (APCI) calcd for C<sub>27</sub>H<sub>31</sub>N<sub>3</sub>NaO<sub>4</sub> (M) 484.2, found 484.2.

## V. Functionalizations of the Cycloaddition Products

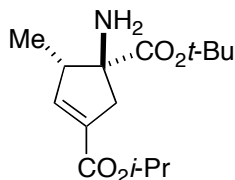

**(1*S*,5*S*)-1-*tert*-Butyl 3-isopropyl 1-amino-5-methylcyclopent-3-ene-1,3-dicarboxylate (eq 4).** An aqueous solution of methylamine (3.6 mL, 42 mmol; 40%)

was added to a solution of (1*S*,5*S*)-1-*tert*-butyl 3-isopropyl 1-(1,3-dioxoisindolin-2-yl)-5-methylcyclopent-3-ene-1,3-dicarboxylate (300 mg, 0.726 mmol; 99% ee) in THF (30 mL), and the resulting mixture was stirred at r.t. for 24 h. Then, the volatiles were removed under reduced pressure, the residue was added to 2-propanol (20 mL), and the volatiles were evaporated under reduced pressure (to remove the residual methylamine). The resulting residue was dissolved in 2-propanol (10 mL), trifluoromethanesulfonimide (1.02 g, 3.63 mmol) was added, and the resulting solution was allowed to stand at r.t. for 2 days. Then, the reaction was quenched by the addition of an aqueous solution of Na<sub>2</sub>CO<sub>3</sub> (4 mL; 10%). The 2-propanol was removed under reduced pressure, the resulting aqueous phase was extracted with EtOAc (4 mL x3), and the combined organic extracts were washed with brine (4 mL). The solvent was removed under reduced pressure, and then toluene (10 mL) was added to the residue. The toluene solution was washed successively with aqueous sodium hydroxide (1%), water, and brine, and then it was dried over Na<sub>2</sub>SO<sub>4</sub> and concentrated under reduced pressure. The residue was purified by column chromatography (100:100:1 CH<sub>2</sub>Cl<sub>2</sub>/EtOAc/NEt<sub>3</sub>), which furnished the title compound as a colorless oil (156 mg, 76% yield) with 98% ee.

$[\alpha]_D^{24} = +137$  (c = 1.0, CHCl<sub>3</sub>).

HPLC analysis of the product: Daicel CHIRALPAK IC column; 65% 2-PrOH in hexane; 0.5 mL/min; retention times for major isomers: 16.3 min (major), 26.6 min (minor).

<sup>1</sup>H NMR (CDCl<sub>3</sub>, 400 MHz) δ 6.55-6.59 (m, 1H), 5.06 (qq, *J* = 6.4, 6.4 Hz, 1H), 3.34 (ddd, *J* = 16.8, 2.2, 2.2 Hz, 1H), 2.68-2.76 (m, 1H), 2.44 (d, *J* = 16.8 Hz, 1H), 1.77 (s, 2H), 1.49 (s, 9H), 1.27 (d, *J* = 6.4 Hz, 3H), 1.26 (d, *J* = 6.4 Hz, 3H), 1.03 (d, *J* = 7.2 Hz, 3H);

<sup>13</sup>C NMR (CDCl<sub>3</sub>, 100 MHz) δ 173.8, 164.4, 144.1, 133.7, 81.4, 67.6, 67.5, 53.6, 41.7, 27.9, 21.8 (2C), 15.2;

IR (film) 3397, 2979, 2935, 1710, 1636, 1457, 1369, 1238, 1161, 1103, 1032, 847, 744 cm<sup>-1</sup>;

LRMS (APCI) calcd for C<sub>15</sub>H<sub>26</sub>NO<sub>4</sub> (M+H) 284.2, found 284.2.

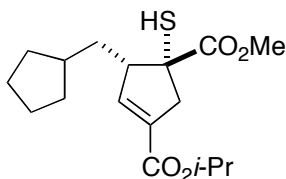

**(1*R*,5*S*)-3-Isopropyl 1-methyl 5-(cyclopentylmethyl)-1-mercaptopropent-3-ene-1,3-dicarboxylate (eq 5).** Hg(TFA)<sub>2</sub> (280 mg, 0.656 mmol) and water (0.8 mL) were added to a solution of (1*R*,5*S*)-3-isopropyl 1-methyl 1-(*tert*-butylthio)-5-(cyclopentylmethyl)cyclopent-3-ene-1,3-dicarboxylate (147 mg, 0.384 mmol; 97% ee, dr: 8:1) in acetic acid (3.4 mL). The reaction mixture was stirred at r.t. for 1 h, and then 2-mercaptoethanol (123 μL, 1.76 mmol) was added. The resulting mixture was stirred for an additional 3 h, and then it was filtered through a plug of silica gel (10 g) and

washed with Et<sub>2</sub>O (100 mL). The filtrate was concentrated under reduced pressure, and the residue was suspended in water (10 mL). The mixture was extracted with Et<sub>2</sub>O (10 mL x4), and the combined organic layers were dried over Na<sub>2</sub>SO<sub>4</sub> and concentrated under reduced pressure. The residue was purified by column chromatography (6:1 hexane/Et<sub>2</sub>O), which furnished the title compound as a colorless oil (88 mg, 70% yield; 98% ee, dr: 8:1).

$[\alpha]_D^{24} = +151$  (c = 1.0, CHCl<sub>3</sub>).

SFC analysis of the product: Daicel CHIRALPAK IC-3 column; 5% MeOH in CO<sub>2</sub>; 3.0 mL/min; retention times: 3.8 min (major), 7.2 min (minor).

<sup>1</sup>H NMR (CDCl<sub>3</sub>, 400 MHz) δ 6.76-6.81 (m, 1H), 5.07 (qq, J = 6.2, 6.2 Hz, 1H), 3.78 (s, 3H), 3.49 (d, J = 17.8 Hz, 1H), 2.98-3.05 (m, 1H), 2.66 (d, J = 17.8 Hz, 1H), 2.63 (s, 1H), 1.29 (d, J = 6.2 Hz, 3H), 1.28 (d, J = 6.2 Hz, 3H), 0.87-1.93 (m, 11H);

<sup>13</sup>C NMR (CDCl<sub>3</sub>, 100 MHz) δ 172.6, 164.0, 143.2, 134.0, 67.9, 58.7, 57.4, 52.6, 41.9, 37.9, 36.8, 33.7, 31.7, 25.1, 24.9, 21.84, 21.82;

IR (film) 3421, 2950, 2868, 1734, 1715, 1653, 1636, 1559, 1540, 1507, 1457, 1437, 1374, 1263, 1233, 1180, 1108, 740 cm<sup>-1</sup>;

LRMS (ESI) calcd for C<sub>17</sub>H<sub>26</sub>NaO<sub>4</sub>S (M+Na) 349.2, found 349.1.

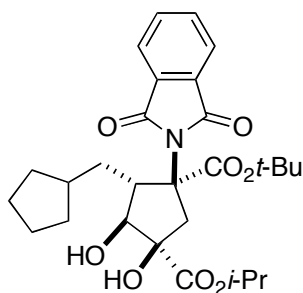

**(1S,3R,4S,5R)-1-tert-Butyl 3-isopropyl 5-(cyclopentylmethyl)-1-(1,3-dioxisoindolin-2-yl)-3,4-dihydroxycyclopentane-1,3-dicarboxylate (eq 6).** A solution of *N*-methylmorpholine *N*-oxide (155 μL, 0.748 mmol; 50%), potassium osmate dihydrate (13.7 mg, 0.0373 mmol), and acetic acid (1 drop) in water (6 mL) was added to a solution of (1*S*,5*S*)-1-*tert*-butyl 3-isopropyl 5-(cyclopentylmethyl)-1-(1,3-dioxisoindolin-2-yl)cyclopent-3-ene-1,3-dicarboxylate (180 mg, 0.374 mmol; 98% ee) in acetonitrile (12 mL), and the resulting mixture was stirred at r.t. for 4 h. Next, aqueous solutions of Na<sub>2</sub>S<sub>2</sub>O<sub>3</sub> (5 mL; 10%) and NaHCO<sub>3</sub> (5 mL; saturated) were added, followed by EtOAc (10 mL). The organic phase was separated, and the aqueous phase was extracted with EtOAc (10 mL x3). The combined organic layers were washed with brine, dried over Na<sub>2</sub>SO<sub>4</sub>, and concentrated under reduced pressure. The ratio of diastereomers of this unpurified mixture was determined by <sup>1</sup>H NMR spectroscopy to be 16:1. The residue was purified by column chromatography (3:1 → 2:1 hexane/EtOAc), which furnished the title compound as a colorless oil (182 mg, 94% yield; dr: 20:1, 99% ee).

$[\alpha]_D^{24} = +162$  (c = 1.0, CHCl<sub>3</sub>).



HPLC analysis of the product: Daicel CHIRALPAK IB-3 column; 10% 2-PrOH in hexane; 0.9 mL/min; retention times for major isomers: 7.8 min (minor), 8.3 min (major).

$^1\text{H}$  NMR ( $\text{CDCl}_3$ , 400 MHz)  $\delta$  7.79-7.85 (m, 2H), 7.68-7.76 (m, 2H), 5.12 (qq,  $J = 6.0, 6.0$  Hz, 1H), 4.28 (dd,  $J = 11.0, 10.0$  Hz, 1H), 3.96 (ddd,  $J = 10.6, 10.6, 3.6$  Hz, 1H), 3.82 (s, 1H), 3.43 (d,  $J = 15.6$  Hz, 1H), 2.78 (d,  $J = 11.0$  Hz, 1H), 2.37 (d,  $J = 15.6$  Hz, 1H), 2.25-2.38 (br s, 1H), 1.10-1.95 (m, 10H), 1.44 (s, 9H), 1.32 (d,  $J = 6.0$  Hz, 3H), 1.31 (d,  $J = 6.0$  Hz, 3H);

$^{13}\text{C}$  NMR ( $\text{CDCl}_3$ , 100 MHz)  $\delta$  173.8, 169.6, 168.8, 134.0, 131.7, 123.0, 83.0, 81.1, 79.8, 70.4, 70.2, 45.5, 44.9, 37.1, 36.7, 34.2, 31.3, 27.8, 25.2, 24.9, 21.7, 21.6;

IR (film) 3448, 2979, 2945, 2868, 1779, 1716, 1653, 1468, 1456, 1371, 1320, 1259, 1154, 1134, 1107, 1042, 1007, 878, 846, 755, 722  $\text{cm}^{-1}$ ;

LRMS (APCI) calcd for  $\text{C}_{28}\text{H}_{37}\text{NNaO}_8$  (M) 538.2, found 538.2.

This compound was recrystallized from hexane to give a single crystal (mp 130–131  $^\circ\text{C}$ ), which was analyzed by X-ray crystallography.

## VI. Preparation of Catalyst 1

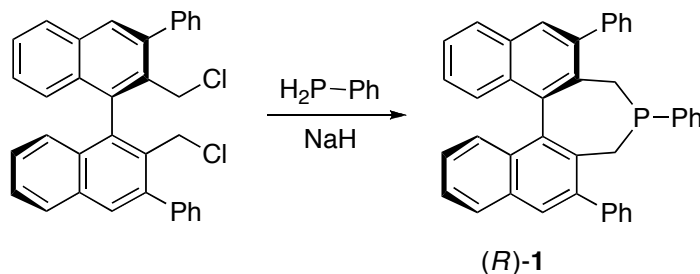

**Phosphepine (R)-1.** (*R*)-2,2'-Bis(chloromethyl)-3,3'-diphenyl-1,1'-binaphthalene<sup>4,5</sup> (1.20 g, 2.38 mmol) and a stir bar were added to an oven-dried 300-mL flask, which was then evacuated and back-filled with nitrogen three times. THF (96 mL; degassed, anhydrous) was added via syringe, and the flask was moved into a glovebox. Phenylphosphine (275  $\mu\text{L}$ , 2.50 mmol) and sodium hydride (72 mg, 2.9 mmol) were added in turn, and the resulting mixture was stirred vigorously at r.t. for 2 days. Additional sodium hydride (108 mg, 4.28 mmol) was then added, and the reaction mixture was stirred for an additional 3 days (the disappearance of starting material was monitored by TLC). Next, the flask was removed from the glovebox, and the reaction mixture was worked up and outside of the glovebox with degassed solvents. First, the THF was removed under reduced pressure, and then the flask was backfilled with nitrogen. Toluene (15 mL) was added, and then water (15 mL) was cautiously added. The phases were separated, and the aqueous phase was extracted with toluene (10 mL).

(4) Ooi, T.; Kameda, M.; Maruoka, K. *J. Am. Chem. Soc.* **2003**, *125*, 5139–5151.

(5) Zhou, Y.-G.; Zhang, X. *Chem. Commun.* **2002**, 1124–1125.

The combined organic phases were washed with water (10 mL), dried (Na<sub>2</sub>SO<sub>4</sub>), filtered through a pad of celite, and concentrated under reduced pressure. The flask was back-filled with nitrogen, and then toluene (3 mL) and 2-propanol (4 mL) were added to the residue under nitrogen. The mixture was heated at 50 °C until all of the solids had dissolved. Next, the stirred solution was cooled to r.t. over 1 h (during which time seed crystals were added). After a significant amount of solid had precipitated, additional 2-propanol (20 mL) was added dropwise, and stirring was continued for another 2 h. The solid was then isolated by filtration, washed with 2-propanol (twice), and dried under reduced pressure to provide phosphepine (*R*)-1 (1.11 g) as a white powder, contaminated with a small amount of 2-propanol (according to <sup>1</sup>H NMR spectroscopy).

In order to remove the 2-propanol, this white solid was dissolved in toluene (12 mL), and then the toluene was removed under reduced pressure. The flask was back-filled with nitrogen, toluene (1.25 mL) was added, and the resulting mixture was heated with stirring at 50 °C. After all of the solid had dissolved, hexane (2.5 mL) was added, and the mixture was allowed to cool to r.t., resulting in the precipitation of a significant quantity of a white solid. Additional hexane (5.5 mL) was added dropwise over 5 min. After 3 h of stirring, the white solid was collected by filtration, washed with pentane (1.5 mL), and dried under reduced pressure to afford phosphepine (*R*)-1 (0.81 g, 63%) as a white powder.

Mp 219–220 °C (decomp.);

$[\alpha]_D^{24} = +148$  ( $c = 1.0$ , CHCl<sub>3</sub>);

<sup>1</sup>H NMR (CDCl<sub>3</sub>, 400 MHz)  $\delta$  7.93 (d,  $J = 8.0$  Hz, 1H), 7.90 (s, 1H), 7.85 (d,  $J = 8.0$  Hz, 1H), 7.70 (d,  $J = 7.2$  Hz, 2H), 7.64 (s, 1H), 7.33–7.48 (m, 5H), 7.03–7.28 (m, 11H), 6.80–6.86 (m, 2H), 6.50–6.90 (br s, 1H), 3.21 (dd,  $J = 14.4, 4.4$  Hz, 1H), 2.96 (dd,  $J = 14.8, 11.6$  Hz, 1H), 2.80 (dd,  $J = 11.6, 2.4$  Hz, 1H), 2.76 (dd,  $J = 14.4, 11.6$  Hz, 1H);

<sup>13</sup>C NMR (CDCl<sub>3</sub>, 100 MHz)  $\delta$  141.3 ( $J = 33$  Hz), 140.14 ( $J = 5$  Hz), 140.12 ( $J = 8$  Hz), 136.1 ( $J = 23$  Hz), 134.7 ( $J = 5$  Hz), 134.0 ( $J = 1$  Hz), 132.2, 132.1 ( $J = 2$  Hz), 131.66 ( $J = 1$  Hz), 131.64 (2C), 131.62, 131.56, 131.4, 131.2, 129.8 ( $J = 5$  Hz), 129.5, 129.2 ( $J = 2$  Hz), 128.7, 128.23, 128.18, 128.14, 128.12, 128.10, 127.2, 126.63, 126.60, 126.2, 125.9, 125.8, 125.5 ( $J = 1$  Hz), 125.2, 28.0 ( $J = 25$  Hz), 25.6 ( $J = 16$  Hz);

<sup>31</sup>P NMR (CDCl<sub>3</sub>, 162 MHz)  $\delta$  5.2;

IR (film) 3054, 1587, 1494, 1433, 1328, 1214, 1072, 1026, 1001 cm<sup>-1</sup>;

LRMS (ESI) calcd for C<sub>40</sub>H<sub>30</sub>P (M+H) 541.21, found 541.21.

The enantiomeric excess of the phosphepine was determined after oxidation to the phosphine oxide. *tert*-Butyl hydroperoxide (3.7  $\mu$ L, 11.1 mmol; 3.0 M solution in isooctane) was added to a solution of phosphepine (*R*)-1 (3.0 mg, 5.5  $\mu$ mol) in CH<sub>2</sub>Cl<sub>2</sub> (1.0 mL). After 5 min of stirring at r.t., an aqueous solution of Na<sub>2</sub>S<sub>2</sub>O<sub>3</sub> (1 mL; 20%) was added, and the resulting mixture was stirred at r.t. for 5 min. The organic phase was separated and then concentrated under reduced pressure. The enantiomeric excess of the phosphine oxide was determined by HPLC analysis [Daicel CHIRALCEL OD-H column; 30% 2-propanol/hexane; 0.8 mL/min; retention times: 6.27 min (*R*), 8.10 min (*S*)].

Mp 281–282 °C;

$[\alpha]_D^{24} = -64$  ( $c = 1.0$ ,  $\text{CHCl}_3$ );

$^1\text{H NMR}$  ( $\text{CDCl}_3$ , 400 MHz)  $\delta$  8.01 (s, 1H), 7.96 (d,  $J = 8.0$  Hz, 1H), 7.92 (d,  $J = 8.0$  Hz, 1H), 7.77 (s, 1H), 7.60–8.10 (br s, 1H), 7.43–7.52 (m, 5H), 7.34–7.38 (m, 1H), 7.05–7.31 (m, 12H), 6.77 (br s, 2H), 3.62 (t,  $J = 14.2$  Hz, 1H), 3.50 (dd,  $J = 14.6$  Hz, 1H), 3.35 (dd,  $J = 22.4$ , 14.2 Hz, 1H), 3.27 (dd,  $J = 14.6$ , 9.2 Hz, 1H);

$^{13}\text{C NMR}$  ( $\text{CDCl}_3$ , 100 MHz)  $\delta$  140.9 ( $J = 4$  Hz), 140.6, 140.4 ( $J = 5$  Hz), 140.0, 135.2 ( $J = 5$  Hz), 134.9 ( $J = 4$  Hz), 132.3 ( $J = 2$  Hz), 132.2 ( $J = 2$  Hz), 132.1, 131.7 ( $J = 3$  Hz), 131.64 ( $J = 2$  Hz), 131.62, 131.2, 130.7 ( $J = 8$  Hz), 130.0 ( $J = 2$  Hz), 129.32, 129.31 ( $J = 3$  Hz), 128.3 ( $J = 11$  Hz), 128.23 ( $J = 1$  Hz), 128.22 (2C), 128.03 ( $J = 7$  Hz), 127.98, 127.94 ( $J = 1$  Hz), 127.2, 126.9, 126.65 ( $J = 1$  Hz), 126.56 ( $J = 1$  Hz), 126.4 ( $J = 1$  Hz), 126.3 ( $J = 1$  Hz), 126.2 ( $J = 1$  Hz), 126.0 ( $J = 1$  Hz), 33.1 ( $J = 65$  Hz), 29.9 ( $J = 64$  Hz);

$^{31}\text{P NMR}$  ( $\text{CDCl}_3$ , 162 MHz)  $\delta$  53.9;

IR (film) 3054, 1957, 1589, 1493, 1449, 1435, 1418, 1402, 1357, 1331, 1275, 1246, 1230, 1211, 1190, 1161, 1151, 1103, 1078, 1024  $\text{cm}^{-1}$ ;

LRMS (APCI) calcd for  $\text{C}_{40}\text{H}_{29}\text{OP}$  (M) 556.63, found 556.70.

X-ray crystal structure of phosphepine (*R*)-1 (for the sake of simplicity, a solvent molecule ( $\text{CH}_2\text{Cl}_2$ ) has been omitted).

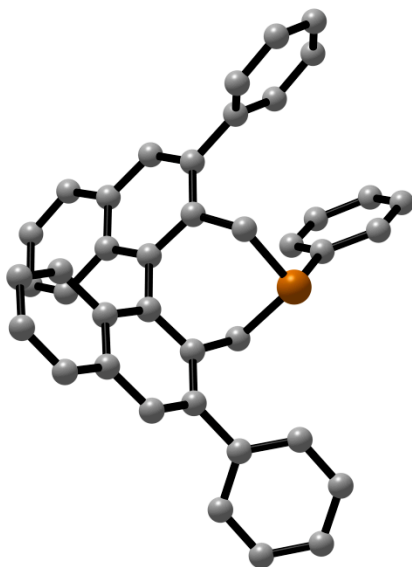

Table 1. Crystal data and structure refinement for d10050.

|                                   |                                                   |                  |
|-----------------------------------|---------------------------------------------------|------------------|
| Identification code               | d10050                                            |                  |
| Empirical formula                 | C <sub>41</sub> H <sub>31</sub> Cl <sub>2</sub> P |                  |
| Formula weight                    | 625.53                                            |                  |
| Temperature                       | 100(2) K                                          |                  |
| Wavelength                        | 1.54178 Å                                         |                  |
| Crystal system                    | Monoclinic                                        |                  |
| Space group                       | P2(1)                                             |                  |
| Unit cell dimensions              | a = 9.2234(2) Å                                   | α = 90°.         |
|                                   | b = 17.7084(5) Å                                  | β = 100.953(2)°. |
|                                   | c = 9.9464(3) Å                                   | γ = 90°.         |
| Volume                            | 1594.97(7) Å <sup>3</sup>                         |                  |
| Z                                 | 2                                                 |                  |
| Density (calculated)              | 1.302 Mg/m <sup>3</sup>                           |                  |
| Absorption coefficient            | 2.516 mm <sup>-1</sup>                            |                  |
| F(000)                            | 652                                               |                  |
| Crystal size                      | 0.45 x 0.20 x 0.15 mm <sup>3</sup>                |                  |
| Theta range for data collection   | 4.53 to 68.25°.                                   |                  |
| Index ranges                      | -11 ≤ h ≤ 11, -17 ≤ k ≤ 21, -11 ≤ l ≤ 11          |                  |
| Reflections collected             | 30883                                             |                  |
| Independent reflections           | 5255 [R(int) = 0.0302]                            |                  |
| Completeness to theta = 68.25°    | 99.9 %                                            |                  |
| Absorption correction             | Semi-empirical from equivalents                   |                  |
| Max. and min. transmission        | 0.7040 and 0.3972                                 |                  |
| Refinement method                 | Full-matrix least-squares on F <sup>2</sup>       |                  |
| Data / restraints / parameters    | 5255 / 1 / 397                                    |                  |
| Goodness-of-fit on F <sup>2</sup> | 1.039                                             |                  |
| Final R indices [I > 2σ(I)]       | R1 = 0.0320, wR2 = 0.0836                         |                  |
| R indices (all data)              | R1 = 0.0330, wR2 = 0.0844                         |                  |
| Absolute structure parameter      | 0.035(12)                                         |                  |
| Largest diff. peak and hole       | 0.222 and -0.381 e.Å <sup>-3</sup>                |                  |

Table 2. Atomic coordinates ( $\times 10^4$ ) and equivalent isotropic displacement parameters ( $\text{\AA}^2 \times 10^3$ ) for d10050.  $U(\text{eq})$  is defined as one-third of the trace of the orthogonalized  $U^{ij}$  tensor.

|       | x        | y        | z        | $U(\text{eq})$ |
|-------|----------|----------|----------|----------------|
| P(1)  | 4560(1)  | 365(1)   | 6162(1)  | 18(1)          |
| C(1)  | 4705(2)  | 1404(1)  | 6247(2)  | 20(1)          |
| C(2)  | 4827(2)  | 1831(1)  | 7444(2)  | 25(1)          |
| C(3)  | 4931(3)  | 2609(1)  | 7401(2)  | 30(1)          |
| C(4)  | 4934(3)  | 2979(1)  | 6177(2)  | 30(1)          |
| C(5)  | 4807(3)  | 2561(2)  | 4978(2)  | 32(1)          |
| C(6)  | 4677(2)  | 1780(1)  | 5014(2)  | 28(1)          |
| C(11) | 6512(2)  | 45(1)    | 6803(2)  | 18(1)          |
| C(12) | 7109(2)  | 251(1)   | 8268(2)  | 18(1)          |
| C(13) | 8129(2)  | 858(1)   | 8608(2)  | 18(1)          |
| C(14) | 8478(2)  | 1105(1)  | 9939(2)  | 20(1)          |
| C(15) | 7844(2)  | 778(1)   | 10993(2) | 20(1)          |
| C(16) | 8136(2)  | 1060(1)  | 12352(2) | 22(1)          |
| C(17) | 7437(2)  | 764(1)   | 13333(2) | 25(1)          |
| C(18) | 6443(2)  | 161(1)   | 13002(2) | 24(1)          |
| C(19) | 6184(2)  | -149(1)  | 11718(2) | 22(1)          |
| C(20) | 6870(2)  | 156(1)   | 10670(2) | 19(1)          |
| C(21) | 6547(2)  | -118(1)  | 9291(2)  | 19(1)          |
| C(22) | 8865(2)  | 1212(1)  | 7547(2)  | 21(1)          |
| C(23) | 8625(2)  | 1966(1)  | 7183(2)  | 27(1)          |
| C(24) | 9352(3)  | 2296(2)  | 6234(3)  | 33(1)          |
| C(25) | 10327(2) | 1877(1)  | 5625(2)  | 30(1)          |
| C(26) | 10549(2) | 1126(1)  | 5957(2)  | 26(1)          |
| C(27) | 9816(2)  | 794(1)   | 6907(2)  | 22(1)          |
| C(31) | 3740(2)  | 118(1)   | 7691(2)  | 19(1)          |
| C(32) | 4172(2)  | -680(1)  | 8125(2)  | 19(1)          |
| C(33) | 3230(2)  | -1314(1) | 7726(2)  | 21(1)          |
| C(34) | 3737(2)  | -2027(1) | 8096(2)  | 23(1)          |
| C(35) | 5183(2)  | -2161(1) | 8841(2)  | 22(1)          |
| C(36) | 5741(2)  | -2903(1) | 9131(2)  | 26(1)          |
| C(37) | 7144(3)  | -3016(1) | 9841(2)  | 30(1)          |

|        |          |          |          |       |
|--------|----------|----------|----------|-------|
| C(38)  | 8055(2)  | -2390(1) | 10308(2) | 29(1) |
| C(39)  | 7562(2)  | -1669(1) | 10029(2) | 24(1) |
| C(40)  | 6114(2)  | -1528(1) | 9281(2)  | 20(1) |
| C(41)  | 5566(2)  | -788(1)  | 8913(2)  | 18(1) |
| C(42)  | 1692(2)  | -1230(1) | 6913(2)  | 23(1) |
| C(43)  | 1406(2)  | -883(1)  | 5637(2)  | 25(1) |
| C(44)  | -25(3)   | -850(1)  | 4875(2)  | 27(1) |
| C(45)  | -1183(2) | -1175(1) | 5382(2)  | 31(1) |
| C(46)  | -914(3)  | -1522(1) | 6651(3)  | 31(1) |
| C(47)  | 513(2)   | -1551(1) | 7419(2)  | 28(1) |
| C(1S)  | 1578(4)  | 9774(2)  | 868(3)   | 55(1) |
| CI(2S) | 2076(1)  | 10346(1) | 2336(1)  | 58(1) |
| CI(1S) | 1754(1)  | 8815(1)  | 1272(1)  | 65(1) |

---

Table 3. Bond lengths [Å] and angles [°] for d10050.

---

|              |            |
|--------------|------------|
| P(1)-C(1)    | 1.845(2)   |
| P(1)-C(31)   | 1.874(2)   |
| P(1)-C(11)   | 1.8802(19) |
| C(1)-C(6)    | 1.391(3)   |
| C(1)-C(2)    | 1.397(3)   |
| C(2)-C(3)    | 1.382(3)   |
| C(2)-H(2)    | 0.9500     |
| C(3)-C(4)    | 1.383(3)   |
| C(3)-H(3)    | 0.9500     |
| C(4)-C(5)    | 1.389(4)   |
| C(4)-H(4)    | 0.9500     |
| C(5)-C(6)    | 1.390(4)   |
| C(5)-H(5)    | 0.9500     |
| C(6)-H(6)    | 0.9500     |
| C(11)-C(12)  | 1.501(2)   |
| C(11)-H(11A) | 0.9900     |
| C(11)-H(11B) | 0.9900     |
| C(12)-C(21)  | 1.390(3)   |
| C(12)-C(13)  | 1.425(3)   |
| C(13)-C(14)  | 1.374(3)   |
| C(13)-C(22)  | 1.496(3)   |
| C(14)-C(15)  | 1.417(3)   |
| C(14)-H(14)  | 0.9500     |
| C(15)-C(16)  | 1.418(3)   |
| C(15)-C(20)  | 1.420(3)   |
| C(16)-C(17)  | 1.372(3)   |
| C(16)-H(16)  | 0.9500     |
| C(17)-C(18)  | 1.405(3)   |
| C(17)-H(17)  | 0.9500     |
| C(18)-C(19)  | 1.369(3)   |
| C(18)-H(18)  | 0.9500     |
| C(19)-C(20)  | 1.424(3)   |
| C(19)-H(19)  | 0.9500     |
| C(20)-C(21)  | 1.433(3)   |

|              |          |
|--------------|----------|
| C(21)-C(41)  | 1.496(3) |
| C(22)-C(23)  | 1.390(3) |
| C(22)-C(27)  | 1.392(3) |
| C(23)-C(24)  | 1.387(3) |
| C(23)-H(23)  | 0.9500   |
| C(24)-C(25)  | 1.389(4) |
| C(24)-H(24)  | 0.9500   |
| C(25)-C(26)  | 1.376(3) |
| C(25)-H(25)  | 0.9500   |
| C(26)-C(27)  | 1.392(3) |
| C(26)-H(26)  | 0.9500   |
| C(27)-H(27)  | 0.9500   |
| C(31)-C(32)  | 1.508(3) |
| C(31)-H(31A) | 0.9900   |
| C(31)-H(31B) | 0.9900   |
| C(32)-C(41)  | 1.386(3) |
| C(32)-C(33)  | 1.429(3) |
| C(33)-C(34)  | 1.373(3) |
| C(33)-C(42)  | 1.500(3) |
| C(34)-C(35)  | 1.418(3) |
| C(34)-H(34)  | 0.9500   |
| C(35)-C(36)  | 1.421(3) |
| C(35)-C(40)  | 1.429(3) |
| C(36)-C(37)  | 1.365(3) |
| C(36)-H(36)  | 0.9500   |
| C(37)-C(38)  | 1.414(3) |
| C(37)-H(37)  | 0.9500   |
| C(38)-C(39)  | 1.366(3) |
| C(38)-H(38)  | 0.9500   |
| C(39)-C(40)  | 1.422(3) |
| C(39)-H(39)  | 0.9500   |
| C(40)-C(41)  | 1.427(3) |
| C(42)-C(43)  | 1.390(3) |
| C(42)-C(47)  | 1.403(3) |
| C(43)-C(44)  | 1.393(3) |
| C(43)-H(43)  | 0.9500   |



|              |          |
|--------------|----------|
| C(44)-C(45)  | 1.390(4) |
| C(44)-H(44)  | 0.9500   |
| C(45)-C(46)  | 1.383(4) |
| C(45)-H(45)  | 0.9500   |
| C(46)-C(47)  | 1.391(3) |
| C(46)-H(46)  | 0.9500   |
| C(47)-H(47)  | 0.9500   |
| C(1S)-Cl(1S) | 1.747(3) |
| C(1S)-Cl(2S) | 1.765(3) |
| C(1S)-H(1S1) | 0.9900   |
| C(1S)-H(1S2) | 0.9900   |

|                    |            |
|--------------------|------------|
| C(1)-P(1)-C(31)    | 103.50(9)  |
| C(1)-P(1)-C(11)    | 103.20(9)  |
| C(31)-P(1)-C(11)   | 99.36(9)   |
| C(6)-C(1)-C(2)     | 118.5(2)   |
| C(6)-C(1)-P(1)     | 116.59(16) |
| C(2)-C(1)-P(1)     | 124.87(16) |
| C(3)-C(2)-C(1)     | 120.5(2)   |
| C(3)-C(2)-H(2)     | 119.7      |
| C(1)-C(2)-H(2)     | 119.7      |
| C(2)-C(3)-C(4)     | 120.7(2)   |
| C(2)-C(3)-H(3)     | 119.6      |
| C(4)-C(3)-H(3)     | 119.6      |
| C(3)-C(4)-C(5)     | 119.3(2)   |
| C(3)-C(4)-H(4)     | 120.3      |
| C(5)-C(4)-H(4)     | 120.3      |
| C(4)-C(5)-C(6)     | 120.1(2)   |
| C(4)-C(5)-H(5)     | 120.0      |
| C(6)-C(5)-H(5)     | 120.0      |
| C(5)-C(6)-C(1)     | 120.8(2)   |
| C(5)-C(6)-H(6)     | 119.6      |
| C(1)-C(6)-H(6)     | 119.6      |
| C(12)-C(11)-P(1)   | 114.00(13) |
| C(12)-C(11)-H(11A) | 108.8      |
| P(1)-C(11)-H(11A)  | 108.8      |

|                     |            |
|---------------------|------------|
| C(12)-C(11)-H(11B)  | 108.8      |
| P(1)-C(11)-H(11B)   | 108.8      |
| H(11A)-C(11)-H(11B) | 107.6      |
| C(21)-C(12)-C(13)   | 120.17(17) |
| C(21)-C(12)-C(11)   | 118.46(17) |
| C(13)-C(12)-C(11)   | 121.13(17) |
| C(14)-C(13)-C(12)   | 119.45(18) |
| C(14)-C(13)-C(22)   | 119.43(19) |
| C(12)-C(13)-C(22)   | 121.09(17) |
| C(13)-C(14)-C(15)   | 121.93(19) |
| C(13)-C(14)-H(14)   | 119.0      |
| C(15)-C(14)-H(14)   | 119.0      |
| C(14)-C(15)-C(16)   | 122.08(19) |
| C(14)-C(15)-C(20)   | 118.84(18) |
| C(16)-C(15)-C(20)   | 119.07(18) |
| C(17)-C(16)-C(15)   | 120.9(2)   |
| C(17)-C(16)-H(16)   | 119.5      |
| C(15)-C(16)-H(16)   | 119.5      |
| C(16)-C(17)-C(18)   | 119.86(19) |
| C(16)-C(17)-H(17)   | 120.1      |
| C(18)-C(17)-H(17)   | 120.1      |
| C(19)-C(18)-C(17)   | 120.93(19) |
| C(19)-C(18)-H(18)   | 119.5      |
| C(17)-C(18)-H(18)   | 119.5      |
| C(18)-C(19)-C(20)   | 120.5(2)   |
| C(18)-C(19)-H(19)   | 119.7      |
| C(20)-C(19)-H(19)   | 119.7      |
| C(15)-C(20)-C(19)   | 118.63(18) |
| C(15)-C(20)-C(21)   | 119.13(18) |
| C(19)-C(20)-C(21)   | 122.15(19) |
| C(12)-C(21)-C(20)   | 120.19(18) |
| C(12)-C(21)-C(41)   | 118.78(17) |
| C(20)-C(21)-C(41)   | 121.00(17) |
| C(23)-C(22)-C(27)   | 118.37(19) |
| C(23)-C(22)-C(13)   | 121.04(19) |
| C(27)-C(22)-C(13)   | 120.59(19) |

|                     |            |
|---------------------|------------|
| C(24)-C(23)-C(22)   | 120.5(2)   |
| C(24)-C(23)-H(23)   | 119.7      |
| C(22)-C(23)-H(23)   | 119.7      |
| C(23)-C(24)-C(25)   | 120.6(2)   |
| C(23)-C(24)-H(24)   | 119.7      |
| C(25)-C(24)-H(24)   | 119.7      |
| C(26)-C(25)-C(24)   | 119.3(2)   |
| C(26)-C(25)-H(25)   | 120.3      |
| C(24)-C(25)-H(25)   | 120.3      |
| C(25)-C(26)-C(27)   | 120.2(2)   |
| C(25)-C(26)-H(26)   | 119.9      |
| C(27)-C(26)-H(26)   | 119.9      |
| C(22)-C(27)-C(26)   | 121.0(2)   |
| C(22)-C(27)-H(27)   | 119.5      |
| C(26)-C(27)-H(27)   | 119.5      |
| C(32)-C(31)-P(1)    | 109.03(13) |
| C(32)-C(31)-H(31A)  | 109.9      |
| P(1)-C(31)-H(31A)   | 109.9      |
| C(32)-C(31)-H(31B)  | 109.9      |
| P(1)-C(31)-H(31B)   | 109.9      |
| H(31A)-C(31)-H(31B) | 108.3      |
| C(41)-C(32)-C(33)   | 119.87(19) |
| C(41)-C(32)-C(31)   | 117.27(18) |
| C(33)-C(32)-C(31)   | 122.83(18) |
| C(34)-C(33)-C(32)   | 119.33(19) |
| C(34)-C(33)-C(42)   | 118.29(19) |
| C(32)-C(33)-C(42)   | 122.39(19) |
| C(33)-C(34)-C(35)   | 122.20(19) |
| C(33)-C(34)-H(34)   | 118.9      |
| C(35)-C(34)-H(34)   | 118.9      |
| C(34)-C(35)-C(36)   | 122.0(2)   |
| C(34)-C(35)-C(40)   | 118.68(19) |
| C(36)-C(35)-C(40)   | 119.34(19) |
| C(37)-C(36)-C(35)   | 120.7(2)   |
| C(37)-C(36)-H(36)   | 119.6      |
| C(35)-C(36)-H(36)   | 119.6      |

|                     |            |
|---------------------|------------|
| C(36)-C(37)-C(38)   | 120.1(2)   |
| C(36)-C(37)-H(37)   | 120.0      |
| C(38)-C(37)-H(37)   | 120.0      |
| C(39)-C(38)-C(37)   | 120.8(2)   |
| C(39)-C(38)-H(38)   | 119.6      |
| C(37)-C(38)-H(38)   | 119.6      |
| C(38)-C(39)-C(40)   | 120.9(2)   |
| C(38)-C(39)-H(39)   | 119.6      |
| C(40)-C(39)-H(39)   | 119.6      |
| C(39)-C(40)-C(41)   | 123.14(19) |
| C(39)-C(40)-C(35)   | 118.21(19) |
| C(41)-C(40)-C(35)   | 118.62(18) |
| C(32)-C(41)-C(40)   | 121.18(19) |
| C(32)-C(41)-C(21)   | 118.91(18) |
| C(40)-C(41)-C(21)   | 119.76(17) |
| C(43)-C(42)-C(47)   | 118.8(2)   |
| C(43)-C(42)-C(33)   | 122.12(19) |
| C(47)-C(42)-C(33)   | 119.0(2)   |
| C(42)-C(43)-C(44)   | 120.7(2)   |
| C(42)-C(43)-H(43)   | 119.6      |
| C(44)-C(43)-H(43)   | 119.6      |
| C(45)-C(44)-C(43)   | 120.0(2)   |
| C(45)-C(44)-H(44)   | 120.0      |
| C(43)-C(44)-H(44)   | 120.0      |
| C(46)-C(45)-C(44)   | 119.8(2)   |
| C(46)-C(45)-H(45)   | 120.1      |
| C(44)-C(45)-H(45)   | 120.1      |
| C(45)-C(46)-C(47)   | 120.3(2)   |
| C(45)-C(46)-H(46)   | 119.8      |
| C(47)-C(46)-H(46)   | 119.8      |
| C(46)-C(47)-C(42)   | 120.3(2)   |
| C(46)-C(47)-H(47)   | 119.8      |
| C(42)-C(47)-H(47)   | 119.8      |
| Cl(1S)-C(1S)-Cl(2S) | 111.67(17) |
| Cl(1S)-C(1S)-H(1S1) | 109.3      |
| Cl(2S)-C(1S)-H(1S1) | 109.3      |

|                     |       |
|---------------------|-------|
| Cl(1S)-C(1S)-H(1S2) | 109.3 |
| Cl(2S)-C(1S)-H(1S2) | 109.3 |
| H(1S1)-C(1S)-H(1S2) | 107.9 |

---

Symmetry transformations used to generate equivalent atoms:

Table 4. Anisotropic displacement parameters ( $\text{\AA}^2 \times 10^3$ ) for d10050. The anisotropic displacement factor exponent takes the form:  $-2\pi^2 [h^2 a^{*2} U^{11} + \dots + 2 h k a^* b^* U^{12}]$ .

|       | U <sup>11</sup> | U <sup>22</sup> | U <sup>33</sup> | U <sup>23</sup> | U <sup>13</sup> | U <sup>12</sup> |
|-------|-----------------|-----------------|-----------------|-----------------|-----------------|-----------------|
| P(1)  | 18(1)           | 20(1)           | 16(1)           | -2(1)           | 2(1)            | -1(1)           |
| C(1)  | 16(1)           | 19(1)           | 23(1)           | 1(1)            | 2(1)            | 2(1)            |
| C(2)  | 32(1)           | 23(1)           | 21(1)           | 0(1)            | 6(1)            | 0(1)            |
| C(3)  | 36(1)           | 26(1)           | 30(1)           | -4(1)           | 10(1)           | 1(1)            |
| C(4)  | 31(1)           | 19(1)           | 41(1)           | 7(1)            | 11(1)           | 5(1)            |
| C(5)  | 36(1)           | 31(1)           | 28(1)           | 10(1)           | 8(1)            | 4(1)            |
| C(6)  | 29(1)           | 31(1)           | 23(1)           | 2(1)            | 6(1)            | 4(1)            |
| C(11) | 17(1)           | 18(1)           | 19(1)           | 0(1)            | 3(1)            | 0(1)            |
| C(12) | 16(1)           | 19(1)           | 18(1)           | 0(1)            | 2(1)            | 4(1)            |
| C(13) | 18(1)           | 16(1)           | 20(1)           | 2(1)            | 2(1)            | 4(1)            |
| C(14) | 18(1)           | 17(1)           | 24(1)           | -1(1)           | 1(1)            | 0(1)            |
| C(15) | 18(1)           | 20(1)           | 21(1)           | 1(1)            | 0(1)            | 5(1)            |
| C(16) | 21(1)           | 21(1)           | 22(1)           | -3(1)           | 0(1)            | 2(1)            |
| C(17) | 28(1)           | 28(1)           | 17(1)           | -3(1)           | -1(1)           | 6(1)            |
| C(18) | 28(1)           | 27(1)           | 17(1)           | 2(1)            | 4(1)            | 3(1)            |
| C(19) | 22(1)           | 22(1)           | 21(1)           | 1(1)            | 1(1)            | 0(1)            |
| C(20) | 18(1)           | 19(1)           | 20(1)           | 2(1)            | 1(1)            | 4(1)            |
| C(21) | 18(1)           | 17(1)           | 21(1)           | 0(1)            | 2(1)            | 2(1)            |
| C(22) | 19(1)           | 21(1)           | 20(1)           | -1(1)           | -2(1)           | -4(1)           |
| C(23) | 28(1)           | 20(1)           | 31(1)           | 1(1)            | 4(1)            | -1(1)           |
| C(24) | 38(1)           | 21(1)           | 40(1)           | 10(1)           | 4(1)            | -4(1)           |
| C(25) | 28(1)           | 35(1)           | 25(1)           | 9(1)            | 3(1)            | -10(1)          |
| C(26) | 21(1)           | 35(1)           | 23(1)           | 2(1)            | 3(1)            | -2(1)           |
| C(27) | 20(1)           | 22(1)           | 25(1)           | 5(1)            | 1(1)            | -1(1)           |
| C(31) | 19(1)           | 20(1)           | 20(1)           | -2(1)           | 4(1)            | -2(1)           |
| C(32) | 21(1)           | 19(1)           | 18(1)           | -4(1)           | 7(1)            | -1(1)           |
| C(33) | 19(1)           | 23(1)           | 22(1)           | -4(1)           | 6(1)            | -3(1)           |
| C(34) | 25(1)           | 19(1)           | 26(1)           | -3(1)           | 7(1)            | -6(1)           |
| C(35) | 28(1)           | 20(1)           | 20(1)           | 0(1)            | 8(1)            | -1(1)           |
| C(36) | 33(1)           | 20(1)           | 27(1)           | 0(1)            | 6(1)            | -3(1)           |
| C(37) | 38(1)           | 21(1)           | 33(1)           | 4(1)            | 8(1)            | 6(1)            |

|        |       |       |       |        |       |        |
|--------|-------|-------|-------|--------|-------|--------|
| C(38)  | 27(1) | 30(1) | 28(1) | 4(1)   | 3(1)  | 4(1)   |
| C(39)  | 25(1) | 24(1) | 23(1) | 0(1)   | 4(1)  | -2(1)  |
| C(40)  | 23(1) | 22(1) | 17(1) | 0(1)   | 8(1)  | -1(1)  |
| C(41)  | 21(1) | 20(1) | 15(1) | -1(1)  | 6(1)  | -2(1)  |
| C(42)  | 20(1) | 17(1) | 30(1) | -9(1)  | 4(1)  | -3(1)  |
| C(43)  | 23(1) | 21(1) | 31(1) | -10(1) | 4(1)  | -1(1)  |
| C(44)  | 27(1) | 20(1) | 33(1) | -11(1) | -1(1) | 3(1)   |
| C(45)  | 21(1) | 26(1) | 43(1) | -15(1) | -2(1) | 4(1)   |
| C(46)  | 22(1) | 27(1) | 46(1) | -11(1) | 9(1)  | -3(1)  |
| C(47)  | 26(1) | 24(1) | 33(1) | -6(1)  | 6(1)  | -2(1)  |
| C(1S)  | 70(2) | 47(2) | 44(2) | 7(1)   | 2(1)  | 14(2)  |
| Cl(2S) | 60(1) | 53(1) | 60(1) | -3(1)  | 11(1) | -12(1) |
| Cl(1S) | 85(1) | 42(1) | 59(1) | 5(1)   | -7(1) | 10(1)  |

---

Table 5. Hydrogen coordinates ( $\times 10^4$ ) and isotropic displacement parameters ( $\text{\AA}^2 \times 10^{-3}$ ) for d10050.

|        | x     | y     | z     | U(eq) |
|--------|-------|-------|-------|-------|
| H(2)   | 4839  | 1585  | 8295  | 30    |
| H(3)   | 5000  | 2893  | 8222  | 36    |
| H(4)   | 5023  | 3513  | 6156  | 36    |
| H(5)   | 4809  | 2810  | 4132  | 38    |
| H(6)   | 4568  | 1499  | 4187  | 33    |
| H(11A) | 6557  | -510  | 6706  | 21    |
| H(11B) | 7155  | 271   | 6219  | 21    |
| H(14)  | 9164  | 1507  | 10160 | 24    |
| H(16)  | 8824  | 1460  | 12587 | 26    |
| H(17)  | 7625  | 965   | 14235 | 30    |
| H(18)  | 5944  | -34   | 13679 | 29    |
| H(19)  | 5542  | -571  | 11524 | 27    |
| H(23)  | 7957  | 2258  | 7588  | 32    |
| H(24)  | 9183  | 2812  | 5997  | 40    |
| H(25)  | 10835 | 2107  | 4986  | 36    |
| H(26)  | 11204 | 834   | 5538  | 32    |
| H(27)  | 9968  | 274   | 7121  | 27    |
| H(31A) | 4106  | 471   | 8451  | 23    |
| H(31B) | 2651  | 161   | 7458  | 23    |
| H(34)  | 3097  | -2445 | 7844  | 28    |
| H(36)  | 5132  | -3326 | 8827  | 32    |
| H(37)  | 7508  | -3514 | 10022 | 36    |
| H(38)  | 9021  | -2473 | 10821 | 35    |
| H(39)  | 8196  | -1256 | 10338 | 29    |
| H(43)  | 2196  | -665  | 5280  | 30    |
| H(44)  | -210  | -606  | 4009  | 33    |
| H(45)  | -2158 | -1159 | 4859  | 37    |
| H(46)  | -1706 | -1742 | 7000  | 38    |
| H(47)  | 689   | -1789 | 8291  | 33    |
| H(1S1) | 542   | 9883  | 430   | 66    |



H(1S2)

2215

9899

202

66

---

## VII. Determination of the Absolute Configurations of the Products

Absolute configuration of the products from cycloaddition of 5-methylenehydantoin:  
Product of Table 2, entry 3, derived from catalyst (S)-1.

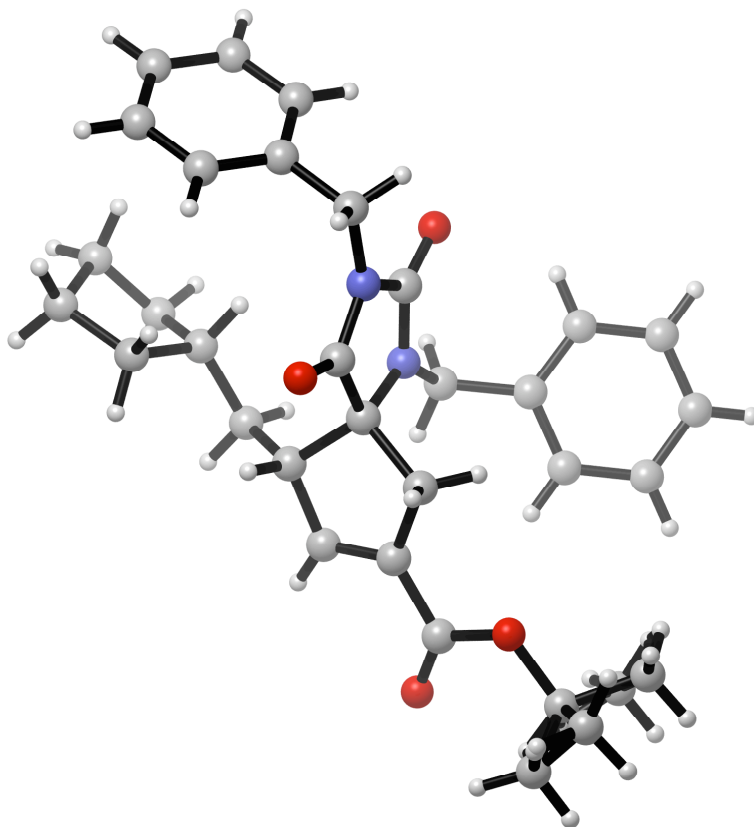

Table 1. Crystal data and structure refinement for x11029.

|                      |                                                               |          |
|----------------------|---------------------------------------------------------------|----------|
| Identification code  | x11029                                                        |          |
| Empirical formula    | C <sub>31</sub> H <sub>36</sub> N <sub>2</sub> O <sub>4</sub> |          |
| Formula weight       | 500.62                                                        |          |
| Temperature          | 100(2) K                                                      |          |
| Wavelength           | 1.54178 Å                                                     |          |
| Crystal system       | Orthorhombic                                                  |          |
| Space group          | P2(1)2(1)2(1)                                                 |          |
| Unit cell dimensions | a = 8.3572(3) Å                                               | a = 90°. |
|                      | b = 12.4724(4) Å                                              | b = 90°. |
|                      | c = 26.0754(8) Å                                              | g = 90°. |
| Volume               | 2717.95(16) Å <sup>3</sup>                                    |          |
| Z                    | 4                                                             |          |

|                                   |                                             |
|-----------------------------------|---------------------------------------------|
| Density (calculated)              | 1.223 Mg/m <sup>3</sup>                     |
| Absorption coefficient            | 0.643 mm <sup>-1</sup>                      |
| F(000)                            | 1072                                        |
| Crystal size                      | 0.25 x 0.20 x 0.15 mm <sup>3</sup>          |
| Theta range for data collection   | 3.39 to 67.73°.                             |
| Index ranges                      | -9<=h<=10, -14<=k<=14, -30<=l<=31           |
| Reflections collected             | 29588                                       |
| Independent reflections           | 4852 [R(int) = 0.0298]                      |
| Completeness to theta = 67.73°    | 99.7 %                                      |
| Absorption correction             | Semi-empirical from equivalents             |
| Max. and min. transmission        | 0.9096 and 0.8557                           |
| Refinement method                 | Full-matrix least-squares on F <sup>2</sup> |
| Data / restraints / parameters    | 4852 / 31 / 355                             |
| Goodness-of-fit on F <sup>2</sup> | 1.037                                       |
| Final R indices [I>2sigma(I)]     | R1 = 0.0254, wR2 = 0.0653                   |
| R indices (all data)              | R1 = 0.0256, wR2 = 0.0657                   |
| Absolute structure parameter      | -0.02(12)                                   |
| Largest diff. peak and hole       | 0.188 and -0.131 e.Å <sup>-3</sup>          |

Table 2. Atomic coordinates ( $\times 10^4$ ) and equivalent isotropic displacement parameters ( $\text{\AA}^2 \times 10^3$ ) for x11029.  $U(\text{eq})$  is defined as one-third of the trace of the orthogonalized  $U^{ij}$  tensor.

|        | x         | y        | z        | $U(\text{eq})$ |
|--------|-----------|----------|----------|----------------|
| O(1)   | 11748(1)  | -1619(1) | 369(1)   | 21(1)          |
| O(2)   | 9906(1)   | 1077(1)  | 1392(1)  | 26(1)          |
| O(4)   | 6882(1)   | -16(1)   | -1362(1) | 27(1)          |
| N(1)   | 11117(1)  | -343(1)  | 973(1)   | 16(1)          |
| N(2)   | 8980(1)   | 417(1)   | 621(1)   | 16(1)          |
| C(1)   | 9458(1)   | -414(1)  | 257(1)   | 15(1)          |
| C(2)   | 8148(1)   | -1287(1) | 151(1)   | 17(1)          |
| C(3)   | 7481(1)   | -943(1)  | -358(1)  | 19(1)          |
| C(4)   | 8404(1)   | -231(1)  | -595(1)  | 18(1)          |
| C(5)   | 9873(1)   | 37(1)    | -284(1)  | 17(1)          |
| C(6)   | 10918(1)  | -891(1)  | 526(1)   | 16(1)          |
| C(7)   | 9956(1)   | 466(1)   | 1032(1)  | 18(1)          |
| C(8)   | 6898(1)   | -1487(1) | 568(1)   | 19(1)          |
| C(9)   | 7520(1)   | -1986(1) | 1064(1)  | 19(1)          |
| C(10)  | 6166(2)   | -2197(1) | 1449(1)  | 27(1)          |
| C(11)  | 6867(2)   | -3021(1) | 1812(1)  | 30(1)          |
| C(12)  | 7736(2)   | -3792(1) | 1452(1)  | 30(1)          |
| C(13)  | 8311(2)   | -3102(1) | 999(1)   | 21(1)          |
| C(14)  | 8050(1)   | 209(1)   | -1111(1) | 20(1)          |
| O(3)   | 9186(1)   | 906(1)   | -1259(1) | 25(1)          |
| C(15)  | 8961(2)   | 1434(1)  | -1755(1) | 28(1)          |
| C(16)  | 9504(3)   | 718(2)   | -2176(1) | 40(1)          |
| C(17)  | 9935(2)   | 2474(1)  | -1719(1) | 39(1)          |
| C(16A) | 10536(15) | 1320(14) | -2025(5) | 58(5)          |
| C(17A) | 8264(19)  | 2430(9)  | -1658(4) | 53(4)          |
| C(18)  | 12371(1)  | -543(1)  | 1353(1)  | 20(1)          |
| C(19)  | 11779(1)  | -1180(1) | 1807(1)  | 19(1)          |
| C(20)  | 11146(2)  | -664(1)  | 2235(1)  | 25(1)          |
| C(21)  | 10578(2)  | -1249(1) | 2648(1)  | 32(1)          |
| C(22)  | 10651(2)  | -2362(1) | 2638(1)  | 32(1)          |
| C(23)  | 11283(2)  | -2879(1) | 2216(1)  | 29(1)          |

|       |          |          |         |       |
|-------|----------|----------|---------|-------|
| C(24) | 11840(2) | -2296(1) | 1801(1) | 23(1) |
| C(25) | 7629(1)  | 1161(1)  | 565(1)  | 19(1) |
| C(26) | 8071(1)  | 2271(1)  | 378(1)  | 19(1) |
| C(27) | 8659(1)  | 3045(1)  | 713(1)  | 22(1) |
| C(28) | 9037(2)  | 4064(1)  | 538(1)  | 27(1) |
| C(29) | 8837(2)  | 4318(1)  | 25(1)   | 29(1) |
| C(30) | 8252(2)  | 3556(1)  | -311(1) | 29(1) |
| C(31) | 7866(2)  | 2536(1)  | -136(1) | 24(1) |

---

Table 3. Bond lengths [ $\text{\AA}$ ] and angles [ $^\circ$ ] for x11029.

---

|              |            |
|--------------|------------|
| O(1)-C(6)    | 1.2134(14) |
| O(2)-C(7)    | 1.2114(14) |
| O(4)-C(14)   | 1.2090(15) |
| N(1)-C(6)    | 1.3614(14) |
| N(1)-C(7)    | 1.4081(15) |
| N(1)-C(18)   | 1.4638(14) |
| N(2)-C(7)    | 1.3487(15) |
| N(2)-C(1)    | 1.4605(14) |
| N(2)-C(25)   | 1.4689(14) |
| C(1)-C(6)    | 1.5276(15) |
| C(1)-C(5)    | 1.5576(15) |
| C(1)-C(2)    | 1.5681(15) |
| C(2)-C(3)    | 1.5022(15) |
| C(2)-C(8)    | 1.5296(16) |
| C(2)-H(2)    | 1.0000     |
| C(3)-C(4)    | 1.3288(17) |
| C(3)-H(3)    | 0.9500     |
| C(4)-C(14)   | 1.4823(16) |
| C(4)-C(5)    | 1.5084(15) |
| C(5)-H(5A)   | 0.9900     |
| C(5)-H(5B)   | 0.9900     |
| C(8)-C(9)    | 1.5255(16) |
| C(8)-H(8A)   | 0.9900     |
| C(8)-H(8B)   | 0.9900     |
| C(9)-C(10)   | 1.5349(16) |
| C(9)-C(13)   | 1.5492(16) |
| C(9)-H(9)    | 1.0000     |
| C(10)-C(11)  | 1.5159(18) |
| C(10)-H(10A) | 0.9900     |
| C(10)-H(10B) | 0.9900     |
| C(11)-C(12)  | 1.5284(19) |
| C(11)-H(11A) | 0.9900     |
| C(11)-H(11B) | 0.9900     |
| C(12)-C(13)  | 1.5382(16) |

|               |            |
|---------------|------------|
| C(12)-H(12A)  | 0.9900     |
| C(12)-H(12B)  | 0.9900     |
| C(13)-H(13A)  | 0.9900     |
| C(13)-H(13B)  | 0.9900     |
| C(14)-O(3)    | 1.3439(15) |
| O(3)-C(15)    | 1.4644(14) |
| C(15)-C(17A)  | 1.395(10)  |
| C(15)-C(16)   | 1.485(2)   |
| C(15)-C(16A)  | 1.499(10)  |
| C(15)-C(17)   | 1.534(2)   |
| C(15)-H(15A)  | 1.0000     |
| C(15)-H(15B)  | 1.0000     |
| C(16)-H(16A)  | 0.9800     |
| C(16)-H(16B)  | 0.9800     |
| C(16)-H(16C)  | 0.9800     |
| C(17)-H(17A)  | 0.9800     |
| C(17)-H(17B)  | 0.9800     |
| C(17)-H(17C)  | 0.9800     |
| C(16A)-H(16D) | 0.9800     |
| C(16A)-H(16E) | 0.9800     |
| C(16A)-H(16F) | 0.9800     |
| C(17A)-H(17D) | 0.9800     |
| C(17A)-H(17E) | 0.9800     |
| C(17A)-H(17F) | 0.9800     |
| C(18)-C(19)   | 1.5094(16) |
| C(18)-H(18A)  | 0.9900     |
| C(18)-H(18B)  | 0.9900     |
| C(19)-C(20)   | 1.3919(17) |
| C(19)-C(24)   | 1.3931(18) |
| C(20)-C(21)   | 1.3844(18) |
| C(20)-H(20)   | 0.9500     |
| C(21)-C(22)   | 1.390(2)   |
| C(21)-H(21)   | 0.9500     |
| C(22)-C(23)   | 1.381(2)   |
| C(22)-H(22)   | 0.9500     |
| C(23)-C(24)   | 1.3841(18) |

|              |            |
|--------------|------------|
| C(23)-H(23)  | 0.9500     |
| C(24)-H(24)  | 0.9500     |
| C(25)-C(26)  | 1.5133(16) |
| C(25)-H(25A) | 0.9900     |
| C(25)-H(25B) | 0.9900     |
| C(26)-C(31)  | 1.3909(17) |
| C(26)-C(27)  | 1.3932(17) |
| C(27)-C(28)  | 1.3875(18) |
| C(27)-H(27)  | 0.9500     |
| C(28)-C(29)  | 1.383(2)   |
| C(28)-H(28)  | 0.9500     |
| C(29)-C(30)  | 1.382(2)   |
| C(29)-H(29)  | 0.9500     |
| C(30)-C(31)  | 1.3900(18) |
| C(30)-H(30)  | 0.9500     |
| C(31)-H(31)  | 0.9500     |

|                 |            |
|-----------------|------------|
| C(6)-N(1)-C(7)  | 111.61(9)  |
| C(6)-N(1)-C(18) | 125.58(9)  |
| C(7)-N(1)-C(18) | 122.80(9)  |
| C(7)-N(2)-C(1)  | 112.50(9)  |
| C(7)-N(2)-C(25) | 121.01(9)  |
| C(1)-N(2)-C(25) | 126.47(9)  |
| N(2)-C(1)-C(6)  | 101.34(9)  |
| N(2)-C(1)-C(5)  | 113.07(9)  |
| C(6)-C(1)-C(5)  | 112.23(9)  |
| N(2)-C(1)-C(2)  | 114.63(9)  |
| C(6)-C(1)-C(2)  | 111.64(9)  |
| C(5)-C(1)-C(2)  | 104.23(8)  |
| C(3)-C(2)-C(8)  | 114.98(10) |
| C(3)-C(2)-C(1)  | 102.57(9)  |
| C(8)-C(2)-C(1)  | 117.62(9)  |
| C(3)-C(2)-H(2)  | 107.0      |
| C(8)-C(2)-H(2)  | 107.0      |
| C(1)-C(2)-H(2)  | 107.0      |
| C(4)-C(3)-C(2)  | 112.65(10) |



|                     |            |
|---------------------|------------|
| C(4)-C(3)-H(3)      | 123.7      |
| C(2)-C(3)-H(3)      | 123.7      |
| C(3)-C(4)-C(14)     | 123.53(11) |
| C(3)-C(4)-C(5)      | 111.78(10) |
| C(14)-C(4)-C(5)     | 124.65(10) |
| C(4)-C(5)-C(1)      | 103.05(9)  |
| C(4)-C(5)-H(5A)     | 111.2      |
| C(1)-C(5)-H(5A)     | 111.2      |
| C(4)-C(5)-H(5B)     | 111.2      |
| C(1)-C(5)-H(5B)     | 111.2      |
| H(5A)-C(5)-H(5B)    | 109.1      |
| O(1)-C(6)-N(1)      | 126.41(11) |
| O(1)-C(6)-C(1)      | 126.39(10) |
| N(1)-C(6)-C(1)      | 107.20(9)  |
| O(2)-C(7)-N(2)      | 128.67(11) |
| O(2)-C(7)-N(1)      | 124.00(10) |
| N(2)-C(7)-N(1)      | 107.33(9)  |
| C(9)-C(8)-C(2)      | 115.93(10) |
| C(9)-C(8)-H(8A)     | 108.3      |
| C(2)-C(8)-H(8A)     | 108.3      |
| C(9)-C(8)-H(8B)     | 108.3      |
| C(2)-C(8)-H(8B)     | 108.3      |
| H(8A)-C(8)-H(8B)    | 107.4      |
| C(8)-C(9)-C(10)     | 111.87(10) |
| C(8)-C(9)-C(13)     | 114.78(9)  |
| C(10)-C(9)-C(13)    | 103.44(9)  |
| C(8)-C(9)-H(9)      | 108.8      |
| C(10)-C(9)-H(9)     | 108.8      |
| C(13)-C(9)-H(9)     | 108.8      |
| C(11)-C(10)-C(9)    | 103.88(10) |
| C(11)-C(10)-H(10A)  | 111.0      |
| C(9)-C(10)-H(10A)   | 111.0      |
| C(11)-C(10)-H(10B)  | 111.0      |
| C(9)-C(10)-H(10B)   | 111.0      |
| H(10A)-C(10)-H(10B) | 109.0      |
| C(10)-C(11)-C(12)   | 103.03(10) |

|                     |            |
|---------------------|------------|
| C(10)-C(11)-H(11A)  | 111.2      |
| C(12)-C(11)-H(11A)  | 111.2      |
| C(10)-C(11)-H(11B)  | 111.2      |
| C(12)-C(11)-H(11B)  | 111.2      |
| H(11A)-C(11)-H(11B) | 109.1      |
| C(11)-C(12)-C(13)   | 105.57(10) |
| C(11)-C(12)-H(12A)  | 110.6      |
| C(13)-C(12)-H(12A)  | 110.6      |
| C(11)-C(12)-H(12B)  | 110.6      |
| C(13)-C(12)-H(12B)  | 110.6      |
| H(12A)-C(12)-H(12B) | 108.8      |
| C(12)-C(13)-C(9)    | 106.57(10) |
| C(12)-C(13)-H(13A)  | 110.4      |
| C(9)-C(13)-H(13A)   | 110.4      |
| C(12)-C(13)-H(13B)  | 110.4      |
| C(9)-C(13)-H(13B)   | 110.4      |
| H(13A)-C(13)-H(13B) | 108.6      |
| O(4)-C(14)-O(3)     | 124.35(10) |
| O(4)-C(14)-C(4)     | 124.59(11) |
| O(3)-C(14)-C(4)     | 111.05(10) |
| C(14)-O(3)-C(15)    | 117.04(9)  |
| C(17A)-C(15)-O(3)   | 107.1(5)   |
| C(17A)-C(15)-C(16)  | 142.9(5)   |
| O(3)-C(15)-C(16)    | 110.01(11) |
| C(17A)-C(15)-C(16A) | 122.5(9)   |
| O(3)-C(15)-C(16A)   | 105.0(4)   |
| C(16)-C(15)-C(16A)  | 47.8(7)    |
| C(17A)-C(15)-C(17)  | 57.2(7)    |
| O(3)-C(15)-C(17)    | 104.94(11) |
| C(16)-C(15)-C(17)   | 113.10(14) |
| C(16A)-C(15)-C(17)  | 69.1(7)    |
| C(17A)-C(15)-H(15A) | 54.8       |
| O(3)-C(15)-H(15A)   | 109.6      |
| C(16)-C(15)-H(15A)  | 109.6      |
| C(16A)-C(15)-H(15A) | 144.2      |
| C(17)-C(15)-H(15A)  | 109.6      |

|                      |            |
|----------------------|------------|
| C(17A)-C(15)-H(15B)  | 107.2      |
| O(3)-C(15)-H(15B)    | 107.2      |
| C(16)-C(15)-H(15B)   | 60.1       |
| C(16A)-C(15)-H(15B)  | 107.2      |
| C(17)-C(15)-H(15B)   | 147.4      |
| H(15A)-C(15)-H(15B)  | 53.7       |
| C(15)-C(16)-H(16A)   | 109.5      |
| C(15)-C(16)-H(16B)   | 109.5      |
| C(15)-C(16)-H(16C)   | 109.5      |
| C(15)-C(17)-H(17A)   | 109.5      |
| C(15)-C(17)-H(17B)   | 109.5      |
| C(15)-C(17)-H(17C)   | 109.5      |
| C(15)-C(16A)-H(16D)  | 109.5      |
| C(15)-C(16A)-H(16E)  | 109.5      |
| H(16D)-C(16A)-H(16E) | 109.5      |
| C(15)-C(16A)-H(16F)  | 109.5      |
| H(16D)-C(16A)-H(16F) | 109.5      |
| H(16E)-C(16A)-H(16F) | 109.5      |
| C(15)-C(17A)-H(17D)  | 109.5      |
| C(15)-C(17A)-H(17E)  | 109.5      |
| H(17D)-C(17A)-H(17E) | 109.5      |
| C(15)-C(17A)-H(17F)  | 109.5      |
| H(17D)-C(17A)-H(17F) | 109.5      |
| H(17E)-C(17A)-H(17F) | 109.5      |
| N(1)-C(18)-C(19)     | 112.73(10) |
| N(1)-C(18)-H(18A)    | 109.0      |
| C(19)-C(18)-H(18A)   | 109.0      |
| N(1)-C(18)-H(18B)    | 109.0      |
| C(19)-C(18)-H(18B)   | 109.0      |
| H(18A)-C(18)-H(18B)  | 107.8      |
| C(20)-C(19)-C(24)    | 119.01(11) |
| C(20)-C(19)-C(18)    | 120.65(11) |
| C(24)-C(19)-C(18)    | 120.34(11) |
| C(21)-C(20)-C(19)    | 120.65(12) |
| C(21)-C(20)-H(20)    | 119.7      |
| C(19)-C(20)-H(20)    | 119.7      |

|                     |            |
|---------------------|------------|
| C(20)-C(21)-C(22)   | 119.83(13) |
| C(20)-C(21)-H(21)   | 120.1      |
| C(22)-C(21)-H(21)   | 120.1      |
| C(23)-C(22)-C(21)   | 119.84(12) |
| C(23)-C(22)-H(22)   | 120.1      |
| C(21)-C(22)-H(22)   | 120.1      |
| C(22)-C(23)-C(24)   | 120.40(12) |
| C(22)-C(23)-H(23)   | 119.8      |
| C(24)-C(23)-H(23)   | 119.8      |
| C(23)-C(24)-C(19)   | 120.26(12) |
| C(23)-C(24)-H(24)   | 119.9      |
| C(19)-C(24)-H(24)   | 119.9      |
| N(2)-C(25)-C(26)    | 114.96(9)  |
| N(2)-C(25)-H(25A)   | 108.5      |
| C(26)-C(25)-H(25A)  | 108.5      |
| N(2)-C(25)-H(25B)   | 108.5      |
| C(26)-C(25)-H(25B)  | 108.5      |
| H(25A)-C(25)-H(25B) | 107.5      |
| C(31)-C(26)-C(27)   | 118.94(11) |
| C(31)-C(26)-C(25)   | 119.88(11) |
| C(27)-C(26)-C(25)   | 121.17(11) |
| C(28)-C(27)-C(26)   | 120.53(12) |
| C(28)-C(27)-H(27)   | 119.7      |
| C(26)-C(27)-H(27)   | 119.7      |
| C(29)-C(28)-C(27)   | 120.04(12) |
| C(29)-C(28)-H(28)   | 120.0      |
| C(27)-C(28)-H(28)   | 120.0      |
| C(30)-C(29)-C(28)   | 119.96(12) |
| C(30)-C(29)-H(29)   | 120.0      |
| C(28)-C(29)-H(29)   | 120.0      |
| C(29)-C(30)-C(31)   | 120.16(12) |
| C(29)-C(30)-H(30)   | 119.9      |
| C(31)-C(30)-H(30)   | 119.9      |
| C(30)-C(31)-C(26)   | 120.37(12) |
| C(30)-C(31)-H(31)   | 119.8      |
| C(26)-C(31)-H(31)   | 119.8      |

---

Symmetry transformations used to generate equivalent atoms:

Table 4. Anisotropic displacement parameters ( $\text{\AA}^2 \times 10^3$ ) for x11029. The anisotropic displacement factor exponent takes the form:  $-2p^2[ h^2 a^{*2}U^{11} + \dots + 2 h k a^* b^* U^{12} ]$

|        | U <sup>11</sup> | U <sup>22</sup> | U <sup>33</sup> | U <sup>23</sup> | U <sup>13</sup> | U <sup>12</sup> |
|--------|-----------------|-----------------|-----------------|-----------------|-----------------|-----------------|
| O(1)   | 22(1)           | 18(1)           | 21(1)           | 0(1)            | 1(1)            | 5(1)            |
| O(2)   | 38(1)           | 21(1)           | 18(1)           | -6(1)           | -4(1)           | 5(1)            |
| O(4)   | 29(1)           | 33(1)           | 20(1)           | 3(1)            | -8(1)           | -4(1)           |
| N(1)   | 19(1)           | 16(1)           | 15(1)           | 2(1)            | -1(1)           | 2(1)            |
| N(2)   | 19(1)           | 13(1)           | 17(1)           | -1(1)           | -1(1)           | 2(1)            |
| C(1)   | 18(1)           | 13(1)           | 15(1)           | -1(1)           | 1(1)            | 0(1)            |
| C(2)   | 20(1)           | 13(1)           | 18(1)           | -1(1)           | -1(1)           | -1(1)           |
| C(3)   | 20(1)           | 17(1)           | 19(1)           | -4(1)           | -3(1)           | 0(1)            |
| C(4)   | 20(1)           | 16(1)           | 17(1)           | -2(1)           | 0(1)            | 1(1)            |
| C(5)   | 19(1)           | 16(1)           | 16(1)           | 1(1)            | -1(1)           | 0(1)            |
| C(6)   | 19(1)           | 13(1)           | 15(1)           | 3(1)            | 2(1)            | -2(1)           |
| C(7)   | 22(1)           | 15(1)           | 15(1)           | 2(1)            | 1(1)            | -1(1)           |
| C(8)   | 18(1)           | 17(1)           | 22(1)           | 0(1)            | 1(1)            | -2(1)           |
| C(9)   | 21(1)           | 17(1)           | 19(1)           | 0(1)            | 3(1)            | -1(1)           |
| C(10)  | 27(1)           | 30(1)           | 24(1)           | 4(1)            | 7(1)            | 5(1)            |
| C(11)  | 33(1)           | 34(1)           | 23(1)           | 6(1)            | 6(1)            | -1(1)           |
| C(12)  | 40(1)           | 23(1)           | 26(1)           | 6(1)            | 3(1)            | 2(1)            |
| C(13)  | 23(1)           | 19(1)           | 21(1)           | 0(1)            | 2(1)            | 3(1)            |
| C(14)  | 21(1)           | 20(1)           | 17(1)           | -2(1)           | -1(1)           | 2(1)            |
| O(3)   | 24(1)           | 32(1)           | 18(1)           | 8(1)            | -2(1)           | -2(1)           |
| C(15)  | 30(1)           | 36(1)           | 20(1)           | 11(1)           | -2(1)           | 0(1)            |
| C(16)  | 55(1)           | 46(1)           | 21(1)           | 8(1)            | 4(1)            | 4(1)            |
| C(17)  | 47(1)           | 38(1)           | 31(1)           | 14(1)           | -2(1)           | -8(1)           |
| C(16A) | 53(8)           | 84(11)          | 38(7)           | 38(7)           | 9(6)            | 25(8)           |
| C(17A) | 75(9)           | 51(7)           | 34(6)           | 19(5)           | 8(6)            | 27(7)           |
| C(18)  | 19(1)           | 22(1)           | 18(1)           | 3(1)            | -4(1)           | -1(1)           |
| C(19)  | 18(1)           | 22(1)           | 17(1)           | 3(1)            | -5(1)           | -2(1)           |
| C(20)  | 32(1)           | 23(1)           | 21(1)           | 1(1)            | -1(1)           | 0(1)            |
| C(21)  | 38(1)           | 39(1)           | 18(1)           | 0(1)            | 3(1)            | -2(1)           |
| C(22)  | 36(1)           | 38(1)           | 23(1)           | 13(1)           | -2(1)           | -8(1)           |
| C(23)  | 32(1)           | 24(1)           | 32(1)           | 10(1)           | -4(1)           | -2(1)           |

|       |       |       |       |       |       |       |
|-------|-------|-------|-------|-------|-------|-------|
| C(24) | 22(1) | 24(1) | 22(1) | 1(1)  | -3(1) | 2(1)  |
| C(25) | 17(1) | 17(1) | 22(1) | -1(1) | 0(1)  | 2(1)  |
| C(26) | 16(1) | 16(1) | 25(1) | 0(1)  | 2(1)  | 5(1)  |
| C(27) | 20(1) | 20(1) | 27(1) | 0(1)  | -2(1) | 3(1)  |
| C(28) | 19(1) | 18(1) | 44(1) | -3(1) | -1(1) | 2(1)  |
| C(29) | 20(1) | 18(1) | 49(1) | 10(1) | 10(1) | 6(1)  |
| C(30) | 29(1) | 28(1) | 28(1) | 10(1) | 7(1)  | 12(1) |
| C(31) | 26(1) | 21(1) | 25(1) | 0(1)  | 0(1)  | 8(1)  |

---

Table 5. Hydrogen coordinates ( $\times 10^4$ ) and isotropic displacement parameters ( $\text{\AA}^2 \times 10^{-3}$ ) for x11029.

|        | x     | y     | z     | U(eq) |
|--------|-------|-------|-------|-------|
| H(2)   | 8721  | -1980 | 93    | 20    |
| H(3)   | 6504  | -1207 | -496  | 23    |
| H(5A)  | 10054 | 821   | -271  | 20    |
| H(5B)  | 10836 | -316  | -427  | 20    |
| H(8A)  | 6384  | -795  | 654   | 23    |
| H(8B)  | 6060  | -1962 | 426   | 23    |
| H(9)   | 8312  | -1486 | 1223  | 23    |
| H(10A) | 5873  | -1533 | 1634  | 32    |
| H(10B) | 5205  | -2483 | 1274  | 32    |
| H(11A) | 6016  | -3394 | 2006  | 36    |
| H(11B) | 7621  | -2684 | 2057  | 36    |
| H(12A) | 7002  | -4362 | 1331  | 36    |
| H(12B) | 8656  | -4131 | 1627  | 36    |
| H(13A) | 7985  | -3430 | 669   | 25    |
| H(13B) | 9492  | -3035 | 1003  | 25    |
| H(15A) | 7804  | 1611  | -1804 | 34    |
| H(15B) | 8162  | 1001  | -1951 | 34    |
| H(16A) | 10635 | 538   | -2125 | 61    |
| H(16B) | 9371  | 1083  | -2506 | 61    |
| H(16C) | 8865  | 59    | -2173 | 61    |
| H(17A) | 9572  | 2891  | -1422 | 58    |
| H(17B) | 9783  | 2896  | -2032 | 58    |
| H(17C) | 11072 | 2300  | -1679 | 58    |
| H(16D) | 10720 | 563   | -2108 | 87    |
| H(16E) | 11396 | 1578  | -1801 | 87    |
| H(16F) | 10521 | 1743  | -2342 | 87    |
| H(17D) | 7223  | 2326  | -1492 | 80    |
| H(17E) | 8118  | 2816  | -1982 | 80    |
| H(17F) | 8962  | 2846  | -1431 | 80    |
| H(18A) | 12797 | 152   | 1475  | 24    |



|        |       |       |      |    |
|--------|-------|-------|------|----|
| H(18B) | 13259 | -938  | 1188 | 24 |
| H(20)  | 11104 | 97    | 2244 | 30 |
| H(21)  | 10139 | -890  | 2937 | 38 |
| H(22)  | 10267 | -2766 | 2922 | 39 |
| H(23)  | 11335 | -3640 | 2210 | 35 |
| H(24)  | 12266 | -2659 | 1511 | 27 |
| H(25A) | 7088  | 1230  | 901  | 23 |
| H(25B) | 6850  | 846   | 322  | 23 |
| H(27)  | 8801  | 2875  | 1065 | 27 |
| H(28)  | 9435  | 4588  | 769  | 32 |
| H(29)  | 9101  | 5014  | -95  | 35 |
| H(30)  | 8113  | 3731  | -663 | 34 |
| H(31)  | 7459  | 2017  | -369 | 28 |

---

Absolute configuration of the products from cycloaddition of the phthalimide-substituted olefin: Product of eq 6, derived from catalyst (S)-1.

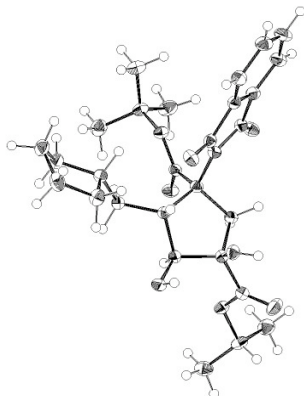

Table 1. Crystal data and structure refinement for D11023.

|                                 |                                                        |                   |
|---------------------------------|--------------------------------------------------------|-------------------|
| Identification code             | d11023                                                 |                   |
| Empirical formula               | C <sub>28</sub> H <sub>37.25</sub> N O <sub>8.12</sub> |                   |
| Formula weight                  | 517.84                                                 |                   |
| Temperature                     | 100(2) K                                               |                   |
| Wavelength                      | 1.54178 Å                                              |                   |
| Crystal system                  | Triclinic                                              |                   |
| Space group                     | P1                                                     |                   |
| Unit cell dimensions            | a = 12.00440(10) Å                                     | α = 65.2090(10)°. |
|                                 | b = 15.5921(2) Å                                       | β = 76.5250(10)°. |
|                                 | c = 16.7986(2) Å                                       | γ = 89.3110(10)°. |
| Volume                          | 2762.81(5) Å <sup>3</sup>                              |                   |
| Z                               | 4                                                      |                   |
| Density (calculated)            | 1.245 Mg/m <sup>3</sup>                                |                   |
| Absorption coefficient          | 0.751 mm <sup>-1</sup>                                 |                   |
| F(000)                          | 1109                                                   |                   |
| Crystal size                    | 0.35 x 0.30 x 0.25 mm <sup>3</sup>                     |                   |
| Theta range for data collection | 2.99 to 69.31°.                                        |                   |
| Index ranges                    | -14 ≤ h ≤ 14, -15 ≤ k ≤ 18, -20 ≤ l ≤ 20               |                   |
| Reflections collected           | 65881                                                  |                   |
| Independent reflections         | 17035 [R(int) = 0.0221]                                |                   |
| Completeness to theta = 69.31°  | 97.3 %                                                 |                   |
| Absorption correction           | Semi-empirical from equivalents                        |                   |
| Max. and min. transmission      | 0.8345 and 0.7791                                      |                   |

|                                      |                                       |
|--------------------------------------|---------------------------------------|
| Refinement method                    | Full-matrix least-squares on $F^2$    |
| Data / restraints / parameters       | 17035 / 660 / 1523                    |
| Goodness-of-fit on $F^2$             | 1.039                                 |
| Final R indices [ $I > 2\sigma(I)$ ] | R1 = 0.0304, wR2 = 0.0807             |
| R indices (all data)                 | R1 = 0.0307, wR2 = 0.0810             |
| Absolute structure parameter         | 0.06(6)                               |
| Largest diff. peak and hole          | 0.372 and -0.286 e. $\text{\AA}^{-3}$ |

Table 2. Atomic coordinates ( $\times 10^4$ ) and equivalent isotropic displacement parameters ( $\text{\AA}^2 \times 10^3$ ) for D11023.  $U(\text{eq})$  is defined as one-third of the trace of the orthogonalized  $U^{ij}$  tensor.

|       | x        | y        | z       | $U(\text{eq})$ |
|-------|----------|----------|---------|----------------|
| C(1)  | 2785(1)  | 8360(1)  | 4187(1) | 18(1)          |
| C(6)  | 3794(1)  | 9015(1)  | 3415(1) | 19(1)          |
| O(1)  | 4416(1)  | 8752(1)  | 2908(1) | 24(1)          |
| O(2)  | 3800(1)  | 9894(1)  | 3358(1) | 20(1)          |
| C(7)  | 4710(1)  | 10648(1) | 2688(1) | 23(1)          |
| C(8)  | 4464(2)  | 11440(1) | 2982(1) | 33(1)          |
| C(9)  | 4558(2)  | 10936(1) | 1742(1) | 31(1)          |
| C(10) | 5893(1)  | 10319(1) | 2775(1) | 32(1)          |
| N(1)  | 2520(1)  | 8691(1)  | 4909(1) | 19(1)          |
| C(11) | 3419(1)  | 8812(1)  | 5272(1) | 20(1)          |
| O(3)  | 4394(1)  | 8637(1)  | 5046(1) | 25(1)          |
| C(12) | 2922(1)  | 9177(1)  | 5950(1) | 22(1)          |
| C(13) | 3433(2)  | 9423(1)  | 6497(1) | 26(1)          |
| C(14) | 2725(2)  | 9756(1)  | 7071(1) | 30(1)          |
| C(15) | 1564(2)  | 9832(1)  | 7094(1) | 29(1)          |
| C(16) | 1054(1)  | 9567(1)  | 6552(1) | 25(1)          |
| C(17) | 1766(1)  | 9242(1)  | 5984(1) | 22(1)          |
| C(18) | 1476(1)  | 8909(1)  | 5337(1) | 20(1)          |
| O(4)  | 535(1)   | 8843(1)  | 5215(1) | 25(1)          |
| C(2)  | 1758(1)  | 8332(1)  | 3756(1) | 18(1)          |
| C(19) | 1682(1)  | 9184(1)  | 2874(1) | 20(1)          |
| C(20) | 872(1)   | 9892(1)  | 3027(1) | 22(1)          |
| C(21) | 913(2)   | 10806(1) | 2170(1) | 26(1)          |
| C(22) | -205(2)  | 11211(1) | 2425(1) | 31(1)          |
| C(23) | -1092(2) | 10337(1) | 2902(1) | 31(1)          |
| C(24) | -411(1)  | 9497(1)  | 3358(1) | 28(1)          |
| C(3)  | 1828(1)  | 7399(1)  | 3661(1) | 19(1)          |
| O(5)  | 765(1)   | 7087(1)  | 3586(1) | 24(1)          |
| C(4)  | 2142(1)  | 6718(1)  | 4530(1) | 19(1)          |
| O(6)  | 1141(1)  | 6574(1)  | 5224(1) | 23(1)          |
| C(25) | 2520(1)  | 5776(1)  | 4560(1) | 22(1)          |

|        |           |          |           |       |
|--------|-----------|----------|-----------|-------|
| O(7)   | 2303(1)   | 5046(1)  | 5247(1)   | 39(1) |
| O(8)   | 3146(1)   | 5858(1)  | 3761(1)   | 22(1) |
| C(26)  | 3588(1)   | 4988(1)  | 3714(1)   | 24(1) |
| C(27)  | 3567(2)   | 5066(1)  | 2792(1)   | 29(1) |
| C(28)  | 4779(2)   | 4927(1)  | 3884(1)   | 30(1) |
| C(5)   | 3114(1)   | 7316(1)  | 4574(1)   | 20(1) |
| C(101) | 2049(1)   | 3578(1)  | 7845(1)   | 19(1) |
| C(106) | 2779(1)   | 2967(1)  | 8485(1)   | 21(1) |
| O(101) | 3226(1)   | 3259(1)  | 8909(1)   | 26(1) |
| O(102) | 2771(1)   | 2089(1)  | 8542(1)   | 21(1) |
| C(107) | 3465(1)   | 1387(1)  | 9074(1)   | 23(1) |
| C(108) | 3364(2)   | 596(1)   | 8784(1)   | 29(1) |
| C(109) | 2895(2)   | 1059(1)  | 10077(1)  | 32(1) |
| C(110) | 4711(1)   | 1790(1)  | 8812(1)   | 29(1) |
| N(101) | 2086(1)   | 3235(1)  | 7145(1)   | 18(1) |
| C(111) | 3172(1)   | 3167(1)  | 6649(1)   | 20(1) |
| O(103) | 4079(1)   | 3387(1)  | 6752(1)   | 23(1) |
| C(112) | 2974(1)   | 2804(1)  | 6006(1)   | 20(1) |
| C(113) | 3752(1)   | 2582(1)  | 5388(1)   | 23(1) |
| C(114) | 3301(1)   | 2282(1)  | 4844(1)   | 26(1) |
| C(115) | 2125(2)   | 2212(1)  | 4920(1)   | 27(1) |
| C(116) | 1345(1)   | 2441(1)  | 5544(1)   | 25(1) |
| C(117) | 1803(1)   | 2727(1)  | 6091(1)   | 20(1) |
| C(118) | 1204(1)   | 3020(1)  | 6812(1)   | 20(1) |
| O(104) | 187(1)    | 3047(1)  | 7062(1)   | 27(1) |
| C(102) | 813(1)    | 3553(1)  | 8443(1)   | 20(1) |
| C(119) | 364(1)    | 2680(1)  | 9354(1)   | 22(1) |
| C(120) | -281(2)   | 1870(1)  | 9313(1)   | 27(1) |
| C(121) | -632(7)   | 998(6)   | 10244(6)  | 37(2) |
| C(122) | -1569(8)  | 437(5)   | 10135(7)  | 44(2) |
| C(123) | -2267(4)  | 1180(4)  | 9603(4)   | 42(1) |
| C(124) | -1502(5)  | 2128(6)  | 9154(6)   | 30(1) |
| C(21B) | -459(14)  | 934(10)  | 10179(11) | 28(2) |
| C(22B) | -1656(13) | 480(10)  | 10304(13) | 36(3) |
| C(23B) | -2301(7)  | 1339(7)  | 9911(9)   | 44(2) |
| C(24B) | -1426(10) | 2042(13) | 9066(12)  | 35(3) |

|        |          |          |          |       |
|--------|----------|----------|----------|-------|
| C(103) | 887(1)   | 4472(1)  | 8560(1)  | 21(1) |
| O(105) | -242(1)  | 4693(1)  | 8832(1)  | 24(1) |
| C(104) | 1562(1)  | 5189(1)  | 7612(1)  | 20(1) |
| O(106) | 895(1)   | 5357(1)  | 6982(1)  | 22(1) |
| O(107) | 1798(1)  | 6902(1)  | 7062(1)  | 32(1) |
| C(125) | 1986(1)  | 6128(1)  | 7576(1)  | 22(1) |
| O(108) | 2592(1)  | 5982(1)  | 8186(1)  | 29(1) |
| C(126) | 3114(13) | 6837(8)  | 8180(8)  | 32(2) |
| C(127) | 4284(15) | 7095(17) | 7523(13) | 38(2) |
| C(128) | 3170(20) | 6577(12) | 9146(9)  | 55(3) |
| C(26B) | 3260(30) | 6789(17) | 8146(15) | 32(3) |
| C(27B) | 4350(30) | 7040(30) | 7410(20) | 36(4) |
| C(28B) | 3450(20) | 6450(20) | 9087(14) | 45(4) |
| C(105) | 2553(1)  | 4640(1)  | 7392(1)  | 21(1) |
| C(201) | 7247(1)  | 8072(1)  | 8568(1)  | 20(1) |
| C(206) | 6276(1)  | 7697(1)  | 9453(1)  | 20(1) |
| O(201) | 5862(1)  | 6884(1)  | 9823(1)  | 27(1) |
| O(202) | 6044(1)  | 8358(1)  | 9755(1)  | 22(1) |
| C(207) | 5248(1)  | 8126(1)  | 10659(1) | 25(1) |
| C(208) | 5256(2)  | 9075(1)  | 10706(1) | 36(1) |
| C(209) | 5739(2)  | 7402(1)  | 11403(1) | 31(1) |
| C(210) | 4057(2)  | 7789(2)  | 10675(1) | 36(1) |
| N(201) | 7250(1)  | 9109(1)  | 8061(1)  | 20(1) |
| C(211) | 6293(1)  | 9480(1)  | 7724(1)  | 20(1) |
| O(203) | 5440(1)  | 9004(1)  | 7820(1)  | 24(1) |
| C(212) | 6548(1)  | 10530(1) | 7274(1)  | 20(1) |
| C(213) | 5926(1)  | 11236(1) | 6804(1)  | 22(1) |
| C(214) | 6382(1)  | 12173(1) | 6484(1)  | 25(1) |
| C(215) | 7429(2)  | 12389(1) | 6616(1)  | 27(1) |
| C(216) | 8055(1)  | 11671(1) | 7081(1)  | 24(1) |
| C(217) | 7586(1)  | 10746(1) | 7407(1)  | 21(1) |
| C(218) | 8038(1)  | 9842(1)  | 7940(1)  | 20(1) |
| O(204) | 8895(1)  | 9767(1)  | 8213(1)  | 26(1) |
| C(202) | 8415(1)  | 7762(1)  | 8827(1)  | 20(1) |
| C(219) | 8445(1)  | 7655(1)  | 9775(1)  | 23(1) |
| C(220) | 9578(1)  | 7416(1)  | 10043(1) | 27(1) |

|        |           |          |           |       |
|--------|-----------|----------|-----------|-------|
| C(221) | 9482(2)   | 7299(2)  | 11010(1)  | 36(1) |
| C(222) | 10689(5)  | 7467(6)  | 11053(4)  | 49(1) |
| C(223) | 11161(8)  | 8318(6)  | 10153(4)  | 67(2) |
| C(22C) | 11390(10) | 8050(12) | 10059(8)  | 49(1) |
| C(23C) | 10746(13) | 7360(20) | 11013(13) | 67(2) |
| C(224) | 10587(2)  | 8191(2)  | 9469(1)   | 42(1) |
| C(203) | 8568(1)   | 6854(1)  | 8688(1)   | 22(1) |
| O(205) | 9714(1)   | 6593(1)  | 8606(1)   | 26(1) |
| C(204) | 8164(1)   | 7079(1)  | 7822(1)   | 23(1) |
| O(206) | 9025(1)   | 7736(1)  | 7086(1)   | 31(1) |
| C(225) | 8065(6)   | 6232(5)  | 7641(5)   | 23(1) |
| O(207) | 8771(4)   | 6112(5)  | 7062(4)   | 31(1) |
| O(208) | 7162(6)   | 5627(4)  | 8208(5)   | 28(1) |
| C(226) | 7057(7)   | 4699(3)  | 8174(5)   | 36(1) |
| C(227) | 6211(8)   | 4077(3)  | 9059(5)   | 51(2) |
| C(228) | 6637(7)   | 4809(6)  | 7354(5)   | 51(2) |
| C(25C) | 7878(17)  | 6041(14) | 7815(15)  | 21(2) |
| O(07C) | 8556(10)  | 5785(10) | 7341(10)  | 28(2) |
| O(08C) | 6894(17)  | 5582(12) | 8362(15)  | 31(2) |
| C(26C) | 6641(15)  | 4607(8)  | 8450(9)   | 32(2) |
| C(27C) | 5709(16)  | 4136(9)  | 9313(9)   | 51(3) |
| C(28C) | 6290(20)  | 4704(16) | 7615(11)  | 56(4) |
| C(205) | 7073(1)   | 7556(1)  | 7976(1)   | 22(1) |
| C(301) | 8365(1)   | 3891(1)  | 3516(1)   | 18(1) |
| C(306) | 7838(1)   | 4274(1)  | 2690(1)   | 18(1) |
| O(301) | 7511(1)   | 5053(1)  | 2414(1)   | 23(1) |
| O(302) | 7875(1)   | 3670(1)  | 2313(1)   | 19(1) |
| C(307) | 7346(1)   | 3880(1)  | 1546(1)   | 21(1) |
| C(308) | 7515(2)   | 2992(1)  | 1390(1)   | 27(1) |
| C(309) | 7994(2)   | 4749(1)  | 720(1)    | 27(1) |
| C(310) | 6080(1)   | 4008(1)  | 1823(1)   | 26(1) |
| N(301) | 8177(1)   | 2838(1)  | 3962(1)   | 18(1) |
| C(311) | 7059(1)   | 2399(1)  | 4196(1)   | 19(1) |
| O(303) | 6224(1)   | 2827(1)  | 4047(1)   | 22(1) |
| C(312) | 7122(1)   | 1359(1)  | 4648(1)   | 19(1) |
| C(313) | 6295(1)   | 601(1)   | 4970(1)   | 22(1) |

|        |           |          |          |       |
|--------|-----------|----------|----------|-------|
| C(314) | 6632(1)   | -308(1)  | 5366(1)  | 24(1) |
| C(315) | 7762(1)   | -448(1)  | 5446(1)  | 25(1) |
| C(316) | 8588(1)   | 321(1)   | 5122(1)  | 23(1) |
| C(317) | 8244(1)   | 1216(1)  | 4719(1)  | 19(1) |
| C(318) | 8940(1)   | 2157(1)  | 4282(1)  | 20(1) |
| O(304) | 9951(1)   | 2288(1)  | 4217(1)  | 25(1) |
| C(302) | 9661(1)   | 4305(1)  | 3185(1)  | 19(1) |
| C(319) | 10295(1)  | 4552(1)  | 2196(1)  | 21(1) |
| C(320) | 10699(1)  | 3715(1)  | 1994(1)  | 22(1) |
| C(321) | 11095(1)  | 4016(1)  | 953(1)   | 28(1) |
| C(322) | 12283(2)  | 3666(1)  | 774(1)   | 33(1) |
| C(323) | 12789(1)  | 3720(1)  | 1511(1)  | 32(1) |
| C(324) | 11770(1)  | 3325(1)  | 2350(1)  | 25(1) |
| C(303) | 9632(1)   | 5170(1)  | 3391(1)  | 19(1) |
| O(305) | 10746(1)  | 5408(1)  | 3423(1)  | 24(1) |
| C(304) | 8734(1)   | 4835(1)  | 4319(1)  | 20(1) |
| O(306) | 9187(1)   | 4175(1)  | 5019(1)  | 23(1) |
| O(307) | 8734(1)   | 5861(1)  | 5054(1)  | 31(1) |
| C(325) | 8382(1)   | 5675(1)  | 4524(1)  | 21(1) |
| O(308) | 7718(1)   | 6201(1)  | 4013(1)  | 31(1) |
| C(326) | 7397(6)   | 7079(3)  | 4093(3)  | 38(1) |
| C(327) | 7226(11)  | 7745(4)  | 3191(4)  | 75(2) |
| C(328) | 6336(5)   | 6839(7)  | 4867(4)  | 62(1) |
| C(26D) | 7110(60)  | 6970(40) | 4180(30) | 38(1) |
| C(27D) | 6750(110) | 7550(60) | 3320(50) | 75(2) |
| C(28D) | 6130(50)  | 6510(80) | 5010(40) | 62(1) |
| C(305) | 7779(1)   | 4304(1)  | 4190(1)  | 20(1) |
| O(1W)  | 8833(4)   | 7435(3)  | 5561(3)  | 72(1) |

---



Table 3. Bond lengths [ $\text{\AA}$ ] and angles [ $^\circ$ ] for D11023.

---

|              |            |
|--------------|------------|
| C(1)-N(1)    | 1.477(2)   |
| C(1)-C(6)    | 1.5423(19) |
| C(1)-C(5)    | 1.564(2)   |
| C(1)-C(2)    | 1.5780(19) |
| C(6)-O(1)    | 1.200(2)   |
| C(6)-O(2)    | 1.3335(19) |
| O(2)-C(7)    | 1.4796(18) |
| C(7)-C(8)    | 1.514(3)   |
| C(7)-C(9)    | 1.515(2)   |
| C(7)-C(10)   | 1.523(2)   |
| C(8)-H(8A)   | 0.9800     |
| C(8)-H(8B)   | 0.9800     |
| C(8)-H(8C)   | 0.9800     |
| C(9)-H(9A)   | 0.9800     |
| C(9)-H(9B)   | 0.9800     |
| C(9)-H(9C)   | 0.9800     |
| C(10)-H(10A) | 0.9800     |
| C(10)-H(10B) | 0.9800     |
| C(10)-H(10C) | 0.9800     |
| N(1)-C(18)   | 1.407(2)   |
| N(1)-C(11)   | 1.4073(19) |
| C(11)-O(3)   | 1.209(2)   |
| C(11)-C(12)  | 1.482(2)   |
| C(12)-C(17)  | 1.380(2)   |
| C(12)-C(13)  | 1.390(2)   |
| C(13)-C(14)  | 1.396(3)   |
| C(13)-H(13)  | 0.9500     |
| C(14)-C(15)  | 1.390(3)   |
| C(14)-H(14)  | 0.9500     |
| C(15)-C(16)  | 1.399(2)   |
| C(15)-H(15)  | 0.9500     |
| C(16)-C(17)  | 1.383(2)   |
| C(16)-H(16)  | 0.9500     |
| C(17)-C(18)  | 1.492(2)   |

|              |            |
|--------------|------------|
| C(18)-O(4)   | 1.2080(19) |
| C(2)-C(3)    | 1.528(2)   |
| C(2)-C(19)   | 1.542(2)   |
| C(2)-H(2)    | 1.0000     |
| C(19)-C(20)  | 1.525(2)   |
| C(19)-H(19A) | 0.9900     |
| C(19)-H(19B) | 0.9900     |
| C(20)-C(21)  | 1.535(2)   |
| C(20)-C(24)  | 1.549(2)   |
| C(20)-H(20)  | 1.0000     |
| C(21)-C(22)  | 1.524(2)   |
| C(21)-H(21A) | 0.9900     |
| C(21)-H(21B) | 0.9900     |
| C(22)-C(23)  | 1.535(3)   |
| C(22)-H(22A) | 0.9900     |
| C(22)-H(22B) | 0.9900     |
| C(23)-C(24)  | 1.547(2)   |
| C(23)-H(23A) | 0.9900     |
| C(23)-H(23B) | 0.9900     |
| C(24)-H(24A) | 0.9900     |
| C(24)-H(24B) | 0.9900     |
| C(3)-O(5)    | 1.4217(17) |
| C(3)-C(4)    | 1.5322(19) |
| C(3)-H(3)    | 1.0000     |
| O(5)-H(5)    | 0.845(16)  |
| C(4)-O(6)    | 1.4090(18) |
| C(4)-C(25)   | 1.518(2)   |
| C(4)-C(5)    | 1.535(2)   |
| O(6)-H(6)    | 0.824(16)  |
| C(25)-O(7)   | 1.208(2)   |
| C(25)-O(8)   | 1.331(2)   |
| O(8)-C(26)   | 1.476(2)   |
| C(26)-C(27)  | 1.508(2)   |
| C(26)-C(28)  | 1.516(2)   |
| C(26)-H(26)  | 1.0000     |
| C(27)-H(27A) | 0.9800     |

|               |            |
|---------------|------------|
| C(27)-H(27B)  | 0.9800     |
| C(27)-H(27C)  | 0.9800     |
| C(28)-H(28A)  | 0.9800     |
| C(28)-H(28B)  | 0.9800     |
| C(28)-H(28C)  | 0.9800     |
| C(5)-H(5A)    | 0.9900     |
| C(5)-H(5B)    | 0.9900     |
| C(101)-N(101) | 1.472(2)   |
| C(101)-C(106) | 1.547(2)   |
| C(101)-C(105) | 1.562(2)   |
| C(101)-C(102) | 1.577(2)   |
| C(106)-O(101) | 1.207(2)   |
| C(106)-O(102) | 1.332(2)   |
| O(102)-C(107) | 1.4821(18) |
| C(107)-C(108) | 1.519(2)   |
| C(107)-C(110) | 1.519(2)   |
| C(107)-C(109) | 1.522(2)   |
| C(108)-H(10D) | 0.9800     |
| C(108)-H(10E) | 0.9800     |
| C(108)-H(10F) | 0.9800     |
| C(109)-H(10G) | 0.9800     |
| C(109)-H(10H) | 0.9800     |
| C(109)-H(10I) | 0.9800     |
| C(110)-H(11A) | 0.9800     |
| C(110)-H(11B) | 0.9800     |
| C(110)-H(11C) | 0.9800     |
| N(101)-C(111) | 1.4028(19) |
| N(101)-C(118) | 1.4109(19) |
| C(111)-O(103) | 1.2163(19) |
| C(111)-C(112) | 1.476(2)   |
| C(112)-C(117) | 1.380(2)   |
| C(112)-C(113) | 1.382(2)   |
| C(113)-C(114) | 1.395(2)   |
| C(113)-H(113) | 0.9500     |
| C(114)-C(115) | 1.389(2)   |
| C(114)-H(114) | 0.9500     |

|               |            |
|---------------|------------|
| C(115)-C(116) | 1.397(2)   |
| C(115)-H(115) | 0.9500     |
| C(116)-C(117) | 1.390(2)   |
| C(116)-H(116) | 0.9500     |
| C(117)-C(118) | 1.498(2)   |
| C(118)-O(104) | 1.2014(19) |
| C(102)-C(103) | 1.532(2)   |
| C(102)-C(119) | 1.539(2)   |
| C(102)-H(102) | 1.0000     |
| C(119)-C(120) | 1.523(2)   |
| C(119)-H(11D) | 0.9900     |
| C(119)-H(11E) | 0.9900     |
| C(120)-C(24B) | 1.515(12)  |
| C(120)-C(21B) | 1.542(11)  |
| C(120)-C(121) | 1.548(7)   |
| C(120)-C(124) | 1.568(6)   |
| C(120)-H(20A) | 1.0000     |
| C(120)-H(20B) | 1.0000     |
| C(121)-C(122) | 1.523(9)   |
| C(121)-H(12A) | 0.9900     |
| C(121)-H(12B) | 0.9900     |
| C(122)-C(123) | 1.517(8)   |
| C(122)-H(12C) | 0.9900     |
| C(122)-H(12D) | 0.9900     |
| C(123)-C(124) | 1.540(8)   |
| C(123)-H(12E) | 0.9900     |
| C(123)-H(12F) | 0.9900     |
| C(124)-H(12G) | 0.9900     |
| C(124)-H(12H) | 0.9900     |
| C(21B)-C(22B) | 1.539(12)  |
| C(21B)-H(21C) | 0.9900     |
| C(21B)-H(21D) | 0.9900     |
| C(22B)-C(23B) | 1.517(13)  |
| C(22B)-H(22C) | 0.9900     |
| C(22B)-H(22D) | 0.9900     |
| C(23B)-C(24B) | 1.532(12)  |

|               |            |
|---------------|------------|
| C(23B)-H(23C) | 0.9900     |
| C(23B)-H(23D) | 0.9900     |
| C(24B)-H(24C) | 0.9900     |
| C(24B)-H(24D) | 0.9900     |
| C(103)-O(105) | 1.4127(19) |
| C(103)-C(104) | 1.539(2)   |
| C(103)-H(103) | 1.0000     |
| O(105)-H(105) | 0.817(17)  |
| C(104)-O(106) | 1.4102(17) |
| C(104)-C(105) | 1.525(2)   |
| C(104)-C(125) | 1.529(2)   |
| O(106)-H(106) | 0.834(16)  |
| O(107)-C(125) | 1.210(2)   |
| C(125)-O(108) | 1.332(2)   |
| O(108)-C(26B) | 1.467(13)  |
| O(108)-C(126) | 1.476(7)   |
| C(126)-C(127) | 1.508(8)   |
| C(126)-C(128) | 1.515(7)   |
| C(126)-H(126) | 1.0000     |
| C(127)-H(12I) | 0.9800     |
| C(127)-H(12J) | 0.9800     |
| C(127)-H(12K) | 0.9800     |
| C(128)-H(12L) | 0.9800     |
| C(128)-H(12M) | 0.9800     |
| C(128)-H(12N) | 0.9800     |
| C(26B)-C(27B) | 1.499(13)  |
| C(26B)-C(28B) | 1.516(13)  |
| C(26B)-H(26B) | 1.0000     |
| C(27B)-H(27D) | 0.9800     |
| C(27B)-H(27E) | 0.9800     |
| C(27B)-H(27F) | 0.9800     |
| C(28B)-H(28D) | 0.9800     |
| C(28B)-H(28E) | 0.9800     |
| C(28B)-H(28F) | 0.9800     |
| C(105)-H(10J) | 0.9900     |
| C(105)-H(10K) | 0.9900     |

|               |            |
|---------------|------------|
| C(201)-N(201) | 1.477(2)   |
| C(201)-C(206) | 1.547(2)   |
| C(201)-C(205) | 1.565(2)   |
| C(201)-C(202) | 1.575(2)   |
| C(206)-O(201) | 1.2043(19) |
| C(206)-O(202) | 1.329(2)   |
| O(202)-C(207) | 1.4903(18) |
| C(207)-C(208) | 1.515(3)   |
| C(207)-C(210) | 1.520(2)   |
| C(207)-C(209) | 1.525(2)   |
| C(208)-H(20C) | 0.9800     |
| C(208)-H(20D) | 0.9800     |
| C(208)-H(20E) | 0.9800     |
| C(209)-H(20F) | 0.9800     |
| C(209)-H(20G) | 0.9800     |
| C(209)-H(20H) | 0.9800     |
| C(210)-H(21E) | 0.9800     |
| C(210)-H(21F) | 0.9800     |
| C(210)-H(21G) | 0.9800     |
| N(201)-C(218) | 1.409(2)   |
| N(201)-C(211) | 1.410(2)   |
| C(211)-O(203) | 1.2109(19) |
| C(211)-C(212) | 1.488(2)   |
| C(212)-C(213) | 1.385(2)   |
| C(212)-C(217) | 1.386(2)   |
| C(213)-C(214) | 1.396(2)   |
| C(213)-H(213) | 0.9500     |
| C(214)-C(215) | 1.395(2)   |
| C(214)-H(214) | 0.9500     |
| C(215)-C(216) | 1.395(2)   |
| C(215)-H(215) | 0.9500     |
| C(216)-C(217) | 1.382(2)   |
| C(216)-H(216) | 0.9500     |
| C(217)-C(218) | 1.495(2)   |
| C(218)-O(204) | 1.2052(19) |
| C(202)-C(203) | 1.530(2)   |

|               |            |
|---------------|------------|
| C(202)-C(219) | 1.539(2)   |
| C(202)-H(202) | 1.0000     |
| C(219)-C(220) | 1.524(2)   |
| C(219)-H(21H) | 0.9900     |
| C(219)-H(21I) | 0.9900     |
| C(220)-C(221) | 1.535(2)   |
| C(220)-C(224) | 1.541(2)   |
| C(220)-H(220) | 1.0000     |
| C(221)-C(222) | 1.500(5)   |
| C(221)-C(23C) | 1.523(14)  |
| C(221)-H(21J) | 0.9900     |
| C(221)-H(21K) | 0.9900     |
| C(221)-H(21L) | 0.9900     |
| C(221)-H(21M) | 0.9900     |
| C(222)-C(223) | 1.518(6)   |
| C(222)-H(22E) | 0.9900     |
| C(222)-H(22F) | 0.9900     |
| C(223)-C(224) | 1.548(6)   |
| C(223)-H(22G) | 0.9900     |
| C(223)-H(22H) | 0.9900     |
| C(22C)-C(224) | 1.489(9)   |
| C(22C)-C(23C) | 1.522(14)  |
| C(22C)-H(22I) | 0.9900     |
| C(22C)-H(22J) | 0.9900     |
| C(23C)-H(23E) | 0.9900     |
| C(23C)-H(23F) | 0.9900     |
| C(224)-H(24I) | 0.9900     |
| C(224)-H(24J) | 0.9900     |
| C(224)-H(24K) | 0.9900     |
| C(224)-H(24L) | 0.9900     |
| C(203)-O(205) | 1.4227(19) |
| C(203)-C(204) | 1.540(2)   |
| C(203)-H(203) | 1.0000     |
| O(205)-H(205) | 0.829(16)  |
| C(204)-O(206) | 1.4196(19) |
| C(204)-C(225) | 1.486(7)   |

|               |            |
|---------------|------------|
| C(204)-C(205) | 1.521(2)   |
| C(204)-C(25C) | 1.663(17)  |
| O(206)-H(206) | 0.831(17)  |
| C(225)-O(207) | 1.210(5)   |
| C(225)-O(208) | 1.327(4)   |
| O(208)-C(226) | 1.479(5)   |
| C(226)-C(227) | 1.514(5)   |
| C(226)-C(228) | 1.519(5)   |
| C(226)-H(226) | 1.0000     |
| C(227)-H(22K) | 0.9800     |
| C(227)-H(22L) | 0.9800     |
| C(227)-H(22M) | 0.9800     |
| C(228)-H(22N) | 0.9800     |
| C(228)-H(22O) | 0.9800     |
| C(228)-H(22P) | 0.9800     |
| C(25C)-O(07C) | 1.189(13)  |
| C(25C)-O(08C) | 1.310(12)  |
| O(08C)-C(26C) | 1.491(13)  |
| C(26C)-C(28C) | 1.502(12)  |
| C(26C)-C(27C) | 1.505(10)  |
| C(26C)-H(26C) | 1.0000     |
| C(27C)-H(27G) | 0.9800     |
| C(27C)-H(27H) | 0.9800     |
| C(27C)-H(27I) | 0.9800     |
| C(28C)-H(28G) | 0.9800     |
| C(28C)-H(28H) | 0.9800     |
| C(28C)-H(28I) | 0.9800     |
| C(205)-H(20I) | 0.9900     |
| C(205)-H(20J) | 0.9900     |
| C(301)-N(301) | 1.4860(19) |
| C(301)-C(306) | 1.5454(19) |
| C(301)-C(305) | 1.556(2)   |
| C(301)-C(302) | 1.5708(19) |
| C(306)-O(301) | 1.2014(19) |
| C(306)-O(302) | 1.331(2)   |
| O(302)-C(307) | 1.4815(17) |



|               |            |
|---------------|------------|
| C(307)-C(308) | 1.516(2)   |
| C(307)-C(310) | 1.520(2)   |
| C(307)-C(309) | 1.521(2)   |
| C(308)-H(30A) | 0.9800     |
| C(308)-H(30B) | 0.9800     |
| C(308)-H(30C) | 0.9800     |
| C(309)-H(30D) | 0.9800     |
| C(309)-H(30E) | 0.9800     |
| C(309)-H(30F) | 0.9800     |
| C(310)-H(31A) | 0.9800     |
| C(310)-H(31B) | 0.9800     |
| C(310)-H(31C) | 0.9800     |
| N(301)-C(311) | 1.4053(18) |
| N(301)-C(318) | 1.409(2)   |
| C(311)-O(303) | 1.2133(19) |
| C(311)-C(312) | 1.484(2)   |
| C(312)-C(313) | 1.385(2)   |
| C(312)-C(317) | 1.386(2)   |
| C(313)-C(314) | 1.392(2)   |
| C(313)-H(313) | 0.9500     |
| C(314)-C(315) | 1.399(2)   |
| C(314)-H(314) | 0.9500     |
| C(315)-C(316) | 1.396(2)   |
| C(315)-H(315) | 0.9500     |
| C(316)-C(317) | 1.379(2)   |
| C(316)-H(316) | 0.9500     |
| C(317)-C(318) | 1.493(2)   |
| C(318)-O(304) | 1.2053(19) |
| C(302)-C(303) | 1.525(2)   |
| C(302)-C(319) | 1.539(2)   |
| C(302)-H(302) | 1.0000     |
| C(319)-C(320) | 1.528(2)   |
| C(319)-H(31D) | 0.9900     |
| C(319)-H(31E) | 0.9900     |
| C(320)-C(324) | 1.554(2)   |
| C(320)-C(321) | 1.559(2)   |

|               |            |
|---------------|------------|
| C(320)-H(320) | 1.0000     |
| C(321)-C(322) | 1.530(2)   |
| C(321)-H(32A) | 0.9900     |
| C(321)-H(32B) | 0.9900     |
| C(322)-C(323) | 1.532(3)   |
| C(322)-H(32C) | 0.9900     |
| C(322)-H(32D) | 0.9900     |
| C(323)-C(324) | 1.533(2)   |
| C(323)-H(32E) | 0.9900     |
| C(323)-H(32F) | 0.9900     |
| C(324)-H(32G) | 0.9900     |
| C(324)-H(32H) | 0.9900     |
| C(303)-O(305) | 1.4110(17) |
| C(303)-C(304) | 1.553(2)   |
| C(303)-H(303) | 1.0000     |
| O(305)-H(305) | 0.821(16)  |
| C(304)-O(306) | 1.4159(18) |
| C(304)-C(325) | 1.520(2)   |
| C(304)-C(305) | 1.528(2)   |
| O(306)-H(306) | 0.781(16)  |
| O(307)-C(325) | 1.205(2)   |
| C(325)-O(308) | 1.326(2)   |
| O(308)-C(326) | 1.468(3)   |
| O(308)-C(26D) | 1.478(19)  |
| C(326)-C(327) | 1.496(3)   |
| C(326)-C(328) | 1.512(4)   |
| C(326)-H(326) | 1.0000     |
| C(327)-H(32I) | 0.9800     |
| C(327)-H(32J) | 0.9800     |
| C(327)-H(32K) | 0.9800     |
| C(328)-H(32L) | 0.9800     |
| C(328)-H(32M) | 0.9800     |
| C(328)-H(32N) | 0.9800     |
| C(26D)-C(28D) | 1.508(17)  |
| C(26D)-C(27D) | 1.510(17)  |
| C(26D)-H(26D) | 1.0000     |

|               |         |
|---------------|---------|
| C(27D)-H(27J) | 0.9800  |
| C(27D)-H(27K) | 0.9800  |
| C(27D)-H(27L) | 0.9800  |
| C(28D)-H(28J) | 0.9800  |
| C(28D)-H(28K) | 0.9800  |
| C(28D)-H(28L) | 0.9800  |
| C(305)-H(30G) | 0.9900  |
| C(305)-H(30H) | 0.9900  |
| O(1W)-H(1W)   | 0.90(2) |
| O(1W)-H(2W)   | 0.89(2) |

|                  |            |
|------------------|------------|
| N(1)-C(1)-C(6)   | 109.26(12) |
| N(1)-C(1)-C(5)   | 110.10(11) |
| C(6)-C(1)-C(5)   | 109.86(12) |
| N(1)-C(1)-C(2)   | 115.09(12) |
| C(6)-C(1)-C(2)   | 107.53(11) |
| C(5)-C(1)-C(2)   | 104.85(12) |
| O(1)-C(6)-O(2)   | 126.65(13) |
| O(1)-C(6)-C(1)   | 122.13(14) |
| O(2)-C(6)-C(1)   | 110.99(12) |
| C(6)-O(2)-C(7)   | 121.27(12) |
| O(2)-C(7)-C(8)   | 101.57(13) |
| O(2)-C(7)-C(9)   | 110.07(12) |
| C(8)-C(7)-C(9)   | 111.04(15) |
| O(2)-C(7)-C(10)  | 110.14(13) |
| C(8)-C(7)-C(10)  | 111.17(14) |
| C(9)-C(7)-C(10)  | 112.34(15) |
| C(7)-C(8)-H(8A)  | 109.5      |
| C(7)-C(8)-H(8B)  | 109.5      |
| H(8A)-C(8)-H(8B) | 109.5      |
| C(7)-C(8)-H(8C)  | 109.5      |
| H(8A)-C(8)-H(8C) | 109.5      |
| H(8B)-C(8)-H(8C) | 109.5      |
| C(7)-C(9)-H(9A)  | 109.5      |
| C(7)-C(9)-H(9B)  | 109.5      |
| H(9A)-C(9)-H(9B) | 109.5      |

|                     |            |
|---------------------|------------|
| C(7)-C(9)-H(9C)     | 109.5      |
| H(9A)-C(9)-H(9C)    | 109.5      |
| H(9B)-C(9)-H(9C)    | 109.5      |
| C(7)-C(10)-H(10A)   | 109.5      |
| C(7)-C(10)-H(10B)   | 109.5      |
| H(10A)-C(10)-H(10B) | 109.5      |
| C(7)-C(10)-H(10C)   | 109.5      |
| H(10A)-C(10)-H(10C) | 109.5      |
| H(10B)-C(10)-H(10C) | 109.5      |
| C(18)-N(1)-C(11)    | 110.72(12) |
| C(18)-N(1)-C(1)     | 130.91(12) |
| C(11)-N(1)-C(1)     | 118.37(12) |
| O(3)-C(11)-N(1)     | 124.01(15) |
| O(3)-C(11)-C(12)    | 129.19(14) |
| N(1)-C(11)-C(12)    | 106.80(13) |
| C(17)-C(12)-C(13)   | 121.65(16) |
| C(17)-C(12)-C(11)   | 107.82(14) |
| C(13)-C(12)-C(11)   | 130.52(15) |
| C(12)-C(13)-C(14)   | 116.77(16) |
| C(12)-C(13)-H(13)   | 121.6      |
| C(14)-C(13)-H(13)   | 121.6      |
| C(15)-C(14)-C(13)   | 121.37(16) |
| C(15)-C(14)-H(14)   | 119.3      |
| C(13)-C(14)-H(14)   | 119.3      |
| C(14)-C(15)-C(16)   | 121.38(16) |
| C(14)-C(15)-H(15)   | 119.3      |
| C(16)-C(15)-H(15)   | 119.3      |
| C(17)-C(16)-C(15)   | 116.69(15) |
| C(17)-C(16)-H(16)   | 121.7      |
| C(15)-C(16)-H(16)   | 121.7      |
| C(12)-C(17)-C(16)   | 122.13(15) |
| C(12)-C(17)-C(18)   | 108.83(14) |
| C(16)-C(17)-C(18)   | 129.04(15) |
| O(4)-C(18)-N(1)     | 127.70(14) |
| O(4)-C(18)-C(17)    | 126.57(14) |
| N(1)-C(18)-C(17)    | 105.73(12) |

|                     |            |
|---------------------|------------|
| C(3)-C(2)-C(19)     | 112.74(12) |
| C(3)-C(2)-C(1)      | 103.73(11) |
| C(19)-C(2)-C(1)     | 118.81(12) |
| C(3)-C(2)-H(2)      | 107.0      |
| C(19)-C(2)-H(2)     | 107.0      |
| C(1)-C(2)-H(2)      | 107.0      |
| C(20)-C(19)-C(2)    | 113.66(13) |
| C(20)-C(19)-H(19A)  | 108.8      |
| C(2)-C(19)-H(19A)   | 108.8      |
| C(20)-C(19)-H(19B)  | 108.8      |
| C(2)-C(19)-H(19B)   | 108.8      |
| H(19A)-C(19)-H(19B) | 107.7      |
| C(19)-C(20)-C(21)   | 114.10(13) |
| C(19)-C(20)-C(24)   | 112.95(13) |
| C(21)-C(20)-C(24)   | 103.49(12) |
| C(19)-C(20)-H(20)   | 108.7      |
| C(21)-C(20)-H(20)   | 108.7      |
| C(24)-C(20)-H(20)   | 108.7      |
| C(22)-C(21)-C(20)   | 102.97(13) |
| C(22)-C(21)-H(21A)  | 111.2      |
| C(20)-C(21)-H(21A)  | 111.2      |
| C(22)-C(21)-H(21B)  | 111.2      |
| C(20)-C(21)-H(21B)  | 111.2      |
| H(21A)-C(21)-H(21B) | 109.1      |
| C(21)-C(22)-C(23)   | 103.27(14) |
| C(21)-C(22)-H(22A)  | 111.1      |
| C(23)-C(22)-H(22A)  | 111.1      |
| C(21)-C(22)-H(22B)  | 111.1      |
| C(23)-C(22)-H(22B)  | 111.1      |
| H(22A)-C(22)-H(22B) | 109.1      |
| C(22)-C(23)-C(24)   | 105.09(13) |
| C(22)-C(23)-H(23A)  | 110.7      |
| C(24)-C(23)-H(23A)  | 110.7      |
| C(22)-C(23)-H(23B)  | 110.7      |
| C(24)-C(23)-H(23B)  | 110.7      |
| H(23A)-C(23)-H(23B) | 108.8      |

|                     |            |
|---------------------|------------|
| C(23)-C(24)-C(20)   | 106.49(13) |
| C(23)-C(24)-H(24A)  | 110.4      |
| C(20)-C(24)-H(24A)  | 110.4      |
| C(23)-C(24)-H(24B)  | 110.4      |
| C(20)-C(24)-H(24B)  | 110.4      |
| H(24A)-C(24)-H(24B) | 108.6      |
| O(5)-C(3)-C(2)      | 111.49(12) |
| O(5)-C(3)-C(4)      | 112.14(12) |
| C(2)-C(3)-C(4)      | 103.07(12) |
| O(5)-C(3)-H(3)      | 110.0      |
| C(2)-C(3)-H(3)      | 110.0      |
| C(4)-C(3)-H(3)      | 110.0      |
| C(3)-O(5)-H(5)      | 105.3(16)  |
| O(6)-C(4)-C(25)     | 110.54(12) |
| O(6)-C(4)-C(3)      | 104.46(12) |
| C(25)-C(4)-C(3)     | 116.21(13) |
| O(6)-C(4)-C(5)      | 111.68(13) |
| C(25)-C(4)-C(5)     | 111.56(12) |
| C(3)-C(4)-C(5)      | 101.97(11) |
| C(4)-O(6)-H(6)      | 108.0(16)  |
| O(7)-C(25)-O(8)     | 124.72(16) |
| O(7)-C(25)-C(4)     | 122.80(15) |
| O(8)-C(25)-C(4)     | 112.43(13) |
| C(25)-O(8)-C(26)    | 117.21(12) |
| O(8)-C(26)-C(27)    | 106.41(13) |
| O(8)-C(26)-C(28)    | 108.06(13) |
| C(27)-C(26)-C(28)   | 113.97(14) |
| O(8)-C(26)-H(26)    | 109.4      |
| C(27)-C(26)-H(26)   | 109.4      |
| C(28)-C(26)-H(26)   | 109.4      |
| C(26)-C(27)-H(27A)  | 109.5      |
| C(26)-C(27)-H(27B)  | 109.5      |
| H(27A)-C(27)-H(27B) | 109.5      |
| C(26)-C(27)-H(27C)  | 109.5      |
| H(27A)-C(27)-H(27C) | 109.5      |
| H(27B)-C(27)-H(27C) | 109.5      |

|                      |            |
|----------------------|------------|
| C(26)-C(28)-H(28A)   | 109.5      |
| C(26)-C(28)-H(28B)   | 109.5      |
| H(28A)-C(28)-H(28B)  | 109.5      |
| C(26)-C(28)-H(28C)   | 109.5      |
| H(28A)-C(28)-H(28C)  | 109.5      |
| H(28B)-C(28)-H(28C)  | 109.5      |
| C(4)-C(5)-C(1)       | 105.47(12) |
| C(4)-C(5)-H(5A)      | 110.6      |
| C(1)-C(5)-H(5A)      | 110.6      |
| C(4)-C(5)-H(5B)      | 110.6      |
| C(1)-C(5)-H(5B)      | 110.6      |
| H(5A)-C(5)-H(5B)     | 108.8      |
| N(101)-C(101)-C(106) | 108.51(12) |
| N(101)-C(101)-C(105) | 109.95(11) |
| C(106)-C(101)-C(105) | 109.51(12) |
| N(101)-C(101)-C(102) | 115.69(12) |
| C(106)-C(101)-C(102) | 107.92(11) |
| C(105)-C(101)-C(102) | 105.11(12) |
| O(101)-C(106)-O(102) | 126.16(14) |
| O(101)-C(106)-C(101) | 122.48(15) |
| O(102)-C(106)-C(101) | 111.21(12) |
| C(106)-O(102)-C(107) | 121.18(12) |
| O(102)-C(107)-C(108) | 101.35(12) |
| O(102)-C(107)-C(110) | 111.18(13) |
| C(108)-C(107)-C(110) | 110.92(14) |
| O(102)-C(107)-C(109) | 108.62(13) |
| C(108)-C(107)-C(109) | 111.12(15) |
| C(110)-C(107)-C(109) | 113.04(14) |
| C(107)-C(108)-H(10D) | 109.5      |
| C(107)-C(108)-H(10E) | 109.5      |
| H(10D)-C(108)-H(10E) | 109.5      |
| C(107)-C(108)-H(10F) | 109.5      |
| H(10D)-C(108)-H(10F) | 109.5      |
| H(10E)-C(108)-H(10F) | 109.5      |
| C(107)-C(109)-H(10G) | 109.5      |
| C(107)-C(109)-H(10H) | 109.5      |

|                      |            |
|----------------------|------------|
| H(10G)-C(109)-H(10H) | 109.5      |
| C(107)-C(109)-H(10I) | 109.5      |
| H(10G)-C(109)-H(10I) | 109.5      |
| H(10H)-C(109)-H(10I) | 109.5      |
| C(107)-C(110)-H(11A) | 109.5      |
| C(107)-C(110)-H(11B) | 109.5      |
| H(11A)-C(110)-H(11B) | 109.5      |
| C(107)-C(110)-H(11C) | 109.5      |
| H(11A)-C(110)-H(11C) | 109.5      |
| H(11B)-C(110)-H(11C) | 109.5      |
| C(111)-N(101)-C(118) | 110.84(12) |
| C(111)-N(101)-C(101) | 117.68(12) |
| C(118)-N(101)-C(101) | 131.28(12) |
| O(103)-C(111)-N(101) | 124.07(14) |
| O(103)-C(111)-C(112) | 128.88(14) |
| N(101)-C(111)-C(112) | 107.04(12) |
| C(117)-C(112)-C(113) | 122.02(14) |
| C(117)-C(112)-C(111) | 107.83(13) |
| C(113)-C(112)-C(111) | 130.13(14) |
| C(112)-C(113)-C(114) | 116.86(14) |
| C(112)-C(113)-H(113) | 121.6      |
| C(114)-C(113)-H(113) | 121.6      |
| C(115)-C(114)-C(113) | 121.38(15) |
| C(115)-C(114)-H(114) | 119.3      |
| C(113)-C(114)-H(114) | 119.3      |
| C(114)-C(115)-C(116) | 121.40(15) |
| C(114)-C(115)-H(115) | 119.3      |
| C(116)-C(115)-H(115) | 119.3      |
| C(117)-C(116)-C(115) | 116.66(15) |
| C(117)-C(116)-H(116) | 121.7      |
| C(115)-C(116)-H(116) | 121.7      |
| C(112)-C(117)-C(116) | 121.66(15) |
| C(112)-C(117)-C(118) | 108.85(13) |
| C(116)-C(117)-C(118) | 129.47(14) |
| O(104)-C(118)-N(101) | 127.70(15) |
| O(104)-C(118)-C(117) | 127.07(14) |



|                      |            |
|----------------------|------------|
| N(101)-C(118)-C(117) | 105.21(12) |
| C(103)-C(102)-C(119) | 112.30(12) |
| C(103)-C(102)-C(101) | 102.85(12) |
| C(119)-C(102)-C(101) | 118.59(13) |
| C(103)-C(102)-H(102) | 107.5      |
| C(119)-C(102)-H(102) | 107.5      |
| C(101)-C(102)-H(102) | 107.5      |
| C(120)-C(119)-C(102) | 115.58(13) |
| C(120)-C(119)-H(11D) | 108.4      |
| C(102)-C(119)-H(11D) | 108.4      |
| C(120)-C(119)-H(11E) | 108.4      |
| C(102)-C(119)-H(11E) | 108.4      |
| H(11D)-C(119)-H(11E) | 107.4      |
| C(24B)-C(120)-C(119) | 117.9(8)   |
| C(24B)-C(120)-C(21B) | 107.6(7)   |
| C(119)-C(120)-C(21B) | 113.5(6)   |
| C(24B)-C(120)-C(121) | 101.3(6)   |
| C(119)-C(120)-C(121) | 112.2(4)   |
| C(119)-C(120)-C(124) | 111.2(4)   |
| C(21B)-C(120)-C(124) | 107.1(6)   |
| C(121)-C(120)-C(124) | 99.9(4)    |
| C(24B)-C(120)-H(20A) | 105.6      |
| C(119)-C(120)-H(20A) | 105.6      |
| C(21B)-C(120)-H(20A) | 105.6      |
| C(121)-C(120)-H(20A) | 114.4      |
| C(124)-C(120)-H(20A) | 113.8      |
| C(24B)-C(120)-H(20B) | 102.6      |
| C(119)-C(120)-H(20B) | 111.0      |
| C(21B)-C(120)-H(20B) | 102.5      |
| C(121)-C(120)-H(20B) | 111.0      |
| C(124)-C(120)-H(20B) | 111.0      |
| C(122)-C(121)-C(120) | 103.2(6)   |
| C(122)-C(121)-H(12A) | 111.1      |
| C(120)-C(121)-H(12A) | 111.1      |
| C(122)-C(121)-H(12B) | 111.1      |
| C(120)-C(121)-H(12B) | 111.1      |

|                      |           |
|----------------------|-----------|
| H(12A)-C(121)-H(12B) | 109.1     |
| C(123)-C(122)-C(121) | 104.9(5)  |
| C(123)-C(122)-H(12C) | 110.8     |
| C(121)-C(122)-H(12C) | 110.8     |
| C(123)-C(122)-H(12D) | 110.8     |
| C(121)-C(122)-H(12D) | 110.8     |
| H(12C)-C(122)-H(12D) | 108.8     |
| C(122)-C(123)-C(124) | 106.2(4)  |
| C(122)-C(123)-H(12E) | 110.5     |
| C(124)-C(123)-H(12E) | 110.5     |
| C(122)-C(123)-H(12F) | 110.5     |
| C(124)-C(123)-H(12F) | 110.5     |
| H(12E)-C(123)-H(12F) | 108.7     |
| C(123)-C(124)-C(120) | 105.9(5)  |
| C(123)-C(124)-H(12G) | 110.5     |
| C(120)-C(124)-H(12G) | 110.5     |
| C(123)-C(124)-H(12H) | 110.5     |
| C(120)-C(124)-H(12H) | 110.5     |
| H(12G)-C(124)-H(12H) | 108.7     |
| C(22B)-C(21B)-C(120) | 105.0(8)  |
| C(22B)-C(21B)-H(21C) | 110.7     |
| C(120)-C(21B)-H(21C) | 110.7     |
| C(22B)-C(21B)-H(21D) | 110.7     |
| C(120)-C(21B)-H(21D) | 110.7     |
| H(21C)-C(21B)-H(21D) | 108.8     |
| C(23B)-C(22B)-C(21B) | 102.6(10) |
| C(23B)-C(22B)-H(22C) | 111.3     |
| C(21B)-C(22B)-H(22C) | 111.3     |
| C(23B)-C(22B)-H(22D) | 111.3     |
| C(21B)-C(22B)-H(22D) | 111.3     |
| H(22C)-C(22B)-H(22D) | 109.2     |
| C(22B)-C(23B)-C(24B) | 104.8(9)  |
| C(22B)-C(23B)-H(23C) | 110.8     |
| C(24B)-C(23B)-H(23C) | 110.8     |
| C(22B)-C(23B)-H(23D) | 110.8     |
| C(24B)-C(23B)-H(23D) | 110.8     |

|                      |            |
|----------------------|------------|
| H(23C)-C(23B)-H(23D) | 108.9      |
| C(120)-C(24B)-C(23B) | 104.3(8)   |
| C(120)-C(24B)-H(24C) | 110.9      |
| C(23B)-C(24B)-H(24C) | 110.9      |
| C(120)-C(24B)-H(24D) | 110.9      |
| C(23B)-C(24B)-H(24D) | 110.9      |
| H(24C)-C(24B)-H(24D) | 108.9      |
| O(105)-C(103)-C(102) | 108.63(12) |
| O(105)-C(103)-C(104) | 113.93(12) |
| C(102)-C(103)-C(104) | 102.70(12) |
| O(105)-C(103)-H(103) | 110.4      |
| C(102)-C(103)-H(103) | 110.4      |
| C(104)-C(103)-H(103) | 110.4      |
| C(103)-O(105)-H(105) | 110.3(17)  |
| O(106)-C(104)-C(105) | 107.83(12) |
| O(106)-C(104)-C(125) | 110.21(12) |
| C(105)-C(104)-C(125) | 112.08(12) |
| O(106)-C(104)-C(103) | 110.16(12) |
| C(105)-C(104)-C(103) | 102.04(12) |
| C(125)-C(104)-C(103) | 114.12(13) |
| C(104)-O(106)-H(106) | 108.3(15)  |
| O(107)-C(125)-O(108) | 124.48(16) |
| O(107)-C(125)-C(104) | 124.46(15) |
| O(108)-C(125)-C(104) | 111.05(13) |
| C(125)-O(108)-C(26B) | 119.3(10)  |
| C(125)-O(108)-C(126) | 116.4(5)   |
| O(108)-C(126)-C(127) | 107.5(9)   |
| O(108)-C(126)-C(128) | 106.3(8)   |
| C(127)-C(126)-C(128) | 113.1(8)   |
| O(108)-C(126)-H(126) | 109.9      |
| C(127)-C(126)-H(126) | 109.9      |
| C(128)-C(126)-H(126) | 109.9      |
| C(126)-C(127)-H(12I) | 109.5      |
| C(126)-C(127)-H(12J) | 109.5      |
| H(12I)-C(127)-H(12J) | 109.5      |
| C(126)-C(127)-H(12K) | 109.5      |

|                      |            |
|----------------------|------------|
| H(12I)-C(127)-H(12K) | 109.5      |
| H(12J)-C(127)-H(12K) | 109.5      |
| C(126)-C(128)-H(12L) | 109.5      |
| C(126)-C(128)-H(12M) | 109.5      |
| H(12L)-C(128)-H(12M) | 109.5      |
| C(126)-C(128)-H(12N) | 109.5      |
| H(12L)-C(128)-H(12N) | 109.5      |
| H(12M)-C(128)-H(12N) | 109.5      |
| O(108)-C(26B)-C(27B) | 109.7(17)  |
| O(108)-C(26B)-C(28B) | 104.4(15)  |
| C(27B)-C(26B)-C(28B) | 113.5(16)  |
| O(108)-C(26B)-H(26B) | 109.7      |
| C(27B)-C(26B)-H(26B) | 109.7      |
| C(28B)-C(26B)-H(26B) | 109.7      |
| C(26B)-C(27B)-H(27D) | 109.5      |
| C(26B)-C(27B)-H(27E) | 109.5      |
| H(27D)-C(27B)-H(27E) | 109.5      |
| C(26B)-C(27B)-H(27F) | 109.5      |
| H(27D)-C(27B)-H(27F) | 109.5      |
| H(27E)-C(27B)-H(27F) | 109.5      |
| C(26B)-C(28B)-H(28D) | 109.5      |
| C(26B)-C(28B)-H(28E) | 109.5      |
| H(28D)-C(28B)-H(28E) | 109.5      |
| C(26B)-C(28B)-H(28F) | 109.5      |
| H(28D)-C(28B)-H(28F) | 109.5      |
| H(28E)-C(28B)-H(28F) | 109.5      |
| C(104)-C(105)-C(101) | 105.75(12) |
| C(104)-C(105)-H(10J) | 110.6      |
| C(101)-C(105)-H(10J) | 110.6      |
| C(104)-C(105)-H(10K) | 110.6      |
| C(101)-C(105)-H(10K) | 110.6      |
| H(10J)-C(105)-H(10K) | 108.7      |
| N(201)-C(201)-C(206) | 110.23(13) |
| N(201)-C(201)-C(205) | 110.37(12) |
| C(206)-C(201)-C(205) | 109.55(12) |
| N(201)-C(201)-C(202) | 113.57(12) |

|                      |            |
|----------------------|------------|
| C(206)-C(201)-C(202) | 107.91(12) |
| C(205)-C(201)-C(202) | 105.04(13) |
| O(201)-C(206)-O(202) | 126.67(14) |
| O(201)-C(206)-C(201) | 121.86(15) |
| O(202)-C(206)-C(201) | 111.32(12) |
| C(206)-O(202)-C(207) | 121.00(12) |
| O(202)-C(207)-C(208) | 102.07(13) |
| O(202)-C(207)-C(210) | 109.57(13) |
| C(208)-C(207)-C(210) | 111.45(16) |
| O(202)-C(207)-C(209) | 109.96(13) |
| C(208)-C(207)-C(209) | 110.34(15) |
| C(210)-C(207)-C(209) | 112.92(15) |
| C(207)-C(208)-H(20C) | 109.5      |
| C(207)-C(208)-H(20D) | 109.5      |
| H(20C)-C(208)-H(20D) | 109.5      |
| C(207)-C(208)-H(20E) | 109.5      |
| H(20C)-C(208)-H(20E) | 109.5      |
| H(20D)-C(208)-H(20E) | 109.5      |
| C(207)-C(209)-H(20F) | 109.5      |
| C(207)-C(209)-H(20G) | 109.5      |
| H(20F)-C(209)-H(20G) | 109.5      |
| C(207)-C(209)-H(20H) | 109.5      |
| H(20F)-C(209)-H(20H) | 109.5      |
| H(20G)-C(209)-H(20H) | 109.5      |
| C(207)-C(210)-H(21E) | 109.5      |
| C(207)-C(210)-H(21F) | 109.5      |
| H(21E)-C(210)-H(21F) | 109.5      |
| C(207)-C(210)-H(21G) | 109.5      |
| H(21E)-C(210)-H(21G) | 109.5      |
| H(21F)-C(210)-H(21G) | 109.5      |
| C(218)-N(201)-C(211) | 110.96(13) |
| C(218)-N(201)-C(201) | 128.99(13) |
| C(211)-N(201)-C(201) | 119.56(12) |
| O(203)-C(211)-N(201) | 124.51(15) |
| O(203)-C(211)-C(212) | 129.04(15) |
| N(201)-C(211)-C(212) | 106.43(12) |

|                      |            |
|----------------------|------------|
| C(213)-C(212)-C(217) | 121.38(15) |
| C(213)-C(212)-C(211) | 130.70(14) |
| C(217)-C(212)-C(211) | 107.91(13) |
| C(212)-C(213)-C(214) | 116.99(14) |
| C(212)-C(213)-H(213) | 121.5      |
| C(214)-C(213)-H(213) | 121.5      |
| C(215)-C(214)-C(213) | 121.53(15) |
| C(215)-C(214)-H(214) | 119.2      |
| C(213)-C(214)-H(214) | 119.2      |
| C(214)-C(215)-C(216) | 120.92(16) |
| C(214)-C(215)-H(215) | 119.5      |
| C(216)-C(215)-H(215) | 119.5      |
| C(217)-C(216)-C(215) | 117.07(15) |
| C(217)-C(216)-H(216) | 121.5      |
| C(215)-C(216)-H(216) | 121.5      |
| C(216)-C(217)-C(212) | 122.10(15) |
| C(216)-C(217)-C(218) | 129.19(14) |
| C(212)-C(217)-C(218) | 108.71(13) |
| O(204)-C(218)-N(201) | 127.81(15) |
| O(204)-C(218)-C(217) | 126.52(14) |
| N(201)-C(218)-C(217) | 105.66(13) |
| C(203)-C(202)-C(219) | 114.96(13) |
| C(203)-C(202)-C(201) | 103.11(12) |
| C(219)-C(202)-C(201) | 114.13(13) |
| C(203)-C(202)-H(202) | 108.1      |
| C(219)-C(202)-H(202) | 108.1      |
| C(201)-C(202)-H(202) | 108.1      |
| C(220)-C(219)-C(202) | 116.65(14) |
| C(220)-C(219)-H(21H) | 108.1      |
| C(202)-C(219)-H(21H) | 108.1      |
| C(220)-C(219)-H(21I) | 108.1      |
| C(202)-C(219)-H(21I) | 108.1      |
| H(21H)-C(219)-H(21I) | 107.3      |
| C(219)-C(220)-C(221) | 111.43(15) |
| C(219)-C(220)-C(224) | 114.58(14) |
| C(221)-C(220)-C(224) | 103.41(15) |

|                      |          |
|----------------------|----------|
| C(219)-C(220)-H(220) | 109.1    |
| C(221)-C(220)-H(220) | 109.1    |
| C(224)-C(220)-H(220) | 109.1    |
| C(222)-C(221)-C(220) | 105.6(3) |
| C(23C)-C(221)-C(220) | 101.1(9) |
| C(222)-C(221)-H(21J) | 110.6    |
| C(23C)-C(221)-H(21J) | 118.4    |
| C(220)-C(221)-H(21J) | 110.6    |
| C(222)-C(221)-H(21K) | 110.6    |
| C(23C)-C(221)-H(21K) | 107.0    |
| C(220)-C(221)-H(21K) | 110.6    |
| H(21J)-C(221)-H(21K) | 108.8    |
| C(222)-C(221)-H(21L) | 103.8    |
| C(23C)-C(221)-H(21L) | 111.5    |
| C(220)-C(221)-H(21L) | 111.5    |
| H(21K)-C(221)-H(21L) | 114.1    |
| C(222)-C(221)-H(21M) | 114.7    |
| C(23C)-C(221)-H(21M) | 111.5    |
| C(220)-C(221)-H(21M) | 111.5    |
| H(21J)-C(221)-H(21M) | 103.8    |
| H(21L)-C(221)-H(21M) | 109.4    |
| C(221)-C(222)-C(223) | 101.6(4) |
| C(221)-C(222)-H(22E) | 111.5    |
| C(223)-C(222)-H(22E) | 111.5    |
| C(221)-C(222)-H(22F) | 111.5    |
| C(223)-C(222)-H(22F) | 111.5    |
| H(22E)-C(222)-H(22F) | 109.3    |
| C(222)-C(223)-C(224) | 106.1(3) |
| C(222)-C(223)-H(22G) | 110.5    |
| C(224)-C(223)-H(22G) | 110.5    |
| C(222)-C(223)-H(22H) | 110.5    |
| C(224)-C(223)-H(22H) | 110.5    |
| H(22G)-C(223)-H(22H) | 108.7    |
| C(224)-C(22C)-C(23C) | 106.8(9) |
| C(224)-C(22C)-H(22I) | 110.4    |
| C(23C)-C(22C)-H(22I) | 110.4    |

|                      |            |
|----------------------|------------|
| C(224)-C(22C)-H(22J) | 110.4      |
| C(23C)-C(22C)-H(22J) | 110.4      |
| H(22I)-C(22C)-H(22J) | 108.6      |
| C(22C)-C(23C)-C(221) | 106.7(10)  |
| C(22C)-C(23C)-H(23E) | 110.4      |
| C(221)-C(23C)-H(23E) | 110.4      |
| C(22C)-C(23C)-H(23F) | 110.4      |
| C(221)-C(23C)-H(23F) | 110.4      |
| H(23E)-C(23C)-H(23F) | 108.6      |
| C(22C)-C(224)-C(220) | 105.5(5)   |
| C(220)-C(224)-C(223) | 105.9(2)   |
| C(22C)-C(224)-H(24I) | 127.7      |
| C(220)-C(224)-H(24I) | 110.6      |
| C(223)-C(224)-H(24I) | 110.6      |
| C(22C)-C(224)-H(24J) | 91.9       |
| C(220)-C(224)-H(24J) | 110.6      |
| C(223)-C(224)-H(24J) | 110.6      |
| H(24I)-C(224)-H(24J) | 108.7      |
| C(22C)-C(224)-H(24K) | 110.6      |
| C(220)-C(224)-H(24K) | 110.6      |
| C(223)-C(224)-H(24K) | 127.4      |
| H(24I)-C(224)-H(24K) | 90.6       |
| C(22C)-C(224)-H(24L) | 110.6      |
| C(220)-C(224)-H(24L) | 110.6      |
| C(223)-C(224)-H(24L) | 91.7       |
| H(24J)-C(224)-H(24L) | 124.7      |
| H(24K)-C(224)-H(24L) | 108.8      |
| O(205)-C(203)-C(202) | 113.77(13) |
| O(205)-C(203)-C(204) | 112.09(13) |
| C(202)-C(203)-C(204) | 103.69(12) |
| O(205)-C(203)-H(203) | 109.0      |
| C(202)-C(203)-H(203) | 109.0      |
| C(204)-C(203)-H(203) | 109.0      |
| C(203)-O(205)-H(205) | 109.9(17)  |
| O(206)-C(204)-C(225) | 106.6(3)   |
| O(206)-C(204)-C(205) | 110.41(13) |



|                      |            |
|----------------------|------------|
| C(225)-C(204)-C(205) | 117.4(3)   |
| O(206)-C(204)-C(203) | 106.96(12) |
| C(225)-C(204)-C(203) | 112.6(4)   |
| C(205)-C(204)-C(203) | 102.52(13) |
| O(206)-C(204)-C(25C) | 117.5(6)   |
| C(205)-C(204)-C(25C) | 111.6(7)   |
| C(203)-C(204)-C(25C) | 106.5(9)   |
| C(204)-O(206)-H(206) | 109.5(19)  |
| O(207)-C(225)-O(208) | 125.5(5)   |
| O(207)-C(225)-C(204) | 122.2(4)   |
| O(208)-C(225)-C(204) | 112.2(4)   |
| C(225)-O(208)-C(226) | 117.2(4)   |
| O(208)-C(226)-C(227) | 104.4(3)   |
| O(208)-C(226)-C(228) | 110.4(5)   |
| C(227)-C(226)-C(228) | 112.5(3)   |
| O(208)-C(226)-H(226) | 109.8      |
| C(227)-C(226)-H(226) | 109.8      |
| C(228)-C(226)-H(226) | 109.8      |
| C(226)-C(227)-H(22K) | 109.5      |
| C(226)-C(227)-H(22L) | 109.5      |
| H(22K)-C(227)-H(22L) | 109.5      |
| C(226)-C(227)-H(22M) | 109.5      |
| H(22K)-C(227)-H(22M) | 109.5      |
| H(22L)-C(227)-H(22M) | 109.5      |
| C(226)-C(228)-H(22N) | 109.5      |
| C(226)-C(228)-H(22O) | 109.5      |
| H(22N)-C(228)-H(22O) | 109.5      |
| C(226)-C(228)-H(22P) | 109.5      |
| H(22N)-C(228)-H(22P) | 109.5      |
| H(22O)-C(228)-H(22P) | 109.5      |
| O(07C)-C(25C)-O(08C) | 126.6(13)  |
| O(07C)-C(25C)-C(204) | 119.3(12)  |
| O(08C)-C(25C)-C(204) | 114.1(11)  |
| C(25C)-O(08C)-C(26C) | 116.5(11)  |
| O(08C)-C(26C)-C(28C) | 107.8(12)  |
| O(08C)-C(26C)-C(27C) | 105.1(9)   |

|                      |            |
|----------------------|------------|
| C(28C)-C(26C)-C(27C) | 114.2(10)  |
| O(08C)-C(26C)-H(26C) | 109.9      |
| C(28C)-C(26C)-H(26C) | 109.9      |
| C(27C)-C(26C)-H(26C) | 109.9      |
| C(26C)-C(27C)-H(27G) | 109.5      |
| C(26C)-C(27C)-H(27H) | 109.5      |
| H(27G)-C(27C)-H(27H) | 109.5      |
| C(26C)-C(27C)-H(27I) | 109.5      |
| H(27G)-C(27C)-H(27I) | 109.5      |
| H(27H)-C(27C)-H(27I) | 109.5      |
| C(26C)-C(28C)-H(28G) | 109.5      |
| C(26C)-C(28C)-H(28H) | 109.5      |
| H(28G)-C(28C)-H(28H) | 109.5      |
| C(26C)-C(28C)-H(28I) | 109.5      |
| H(28G)-C(28C)-H(28I) | 109.5      |
| H(28H)-C(28C)-H(28I) | 109.5      |
| C(204)-C(205)-C(201) | 106.54(12) |
| C(204)-C(205)-H(20I) | 110.4      |
| C(201)-C(205)-H(20I) | 110.4      |
| C(204)-C(205)-H(20J) | 110.4      |
| C(201)-C(205)-H(20J) | 110.4      |
| H(20I)-C(205)-H(20J) | 108.6      |
| N(301)-C(301)-C(306) | 109.32(12) |
| N(301)-C(301)-C(305) | 110.16(11) |
| C(306)-C(301)-C(305) | 109.03(12) |
| N(301)-C(301)-C(302) | 114.67(12) |
| C(306)-C(301)-C(302) | 108.22(11) |
| C(305)-C(301)-C(302) | 105.26(12) |
| O(301)-C(306)-O(302) | 126.41(14) |
| O(301)-C(306)-C(301) | 121.67(14) |
| O(302)-C(306)-C(301) | 111.76(12) |
| C(306)-O(302)-C(307) | 120.06(12) |
| O(302)-C(307)-C(308) | 101.74(12) |
| O(302)-C(307)-C(310) | 109.88(12) |
| C(308)-C(307)-C(310) | 111.87(13) |
| O(302)-C(307)-C(309) | 110.28(12) |

|                      |            |
|----------------------|------------|
| C(308)-C(307)-C(309) | 110.87(14) |
| C(310)-C(307)-C(309) | 111.76(14) |
| C(307)-C(308)-H(30A) | 109.5      |
| C(307)-C(308)-H(30B) | 109.5      |
| H(30A)-C(308)-H(30B) | 109.5      |
| C(307)-C(308)-H(30C) | 109.5      |
| H(30A)-C(308)-H(30C) | 109.5      |
| H(30B)-C(308)-H(30C) | 109.5      |
| C(307)-C(309)-H(30D) | 109.5      |
| C(307)-C(309)-H(30E) | 109.5      |
| H(30D)-C(309)-H(30E) | 109.5      |
| C(307)-C(309)-H(30F) | 109.5      |
| H(30D)-C(309)-H(30F) | 109.5      |
| H(30E)-C(309)-H(30F) | 109.5      |
| C(307)-C(310)-H(31A) | 109.5      |
| C(307)-C(310)-H(31B) | 109.5      |
| H(31A)-C(310)-H(31B) | 109.5      |
| C(307)-C(310)-H(31C) | 109.5      |
| H(31A)-C(310)-H(31C) | 109.5      |
| H(31B)-C(310)-H(31C) | 109.5      |
| C(311)-N(301)-C(318) | 110.54(12) |
| C(311)-N(301)-C(301) | 118.94(12) |
| C(318)-N(301)-C(301) | 130.26(12) |
| O(303)-C(311)-N(301) | 124.04(14) |
| O(303)-C(311)-C(312) | 128.77(14) |
| N(301)-C(311)-C(312) | 107.19(12) |
| C(313)-C(312)-C(317) | 121.17(15) |
| C(313)-C(312)-C(311) | 131.39(14) |
| C(317)-C(312)-C(311) | 107.44(13) |
| C(312)-C(313)-C(314) | 117.53(14) |
| C(312)-C(313)-H(313) | 121.2      |
| C(314)-C(313)-H(313) | 121.2      |
| C(313)-C(314)-C(315) | 121.04(14) |
| C(313)-C(314)-H(314) | 119.5      |
| C(315)-C(314)-H(314) | 119.5      |
| C(316)-C(315)-C(314) | 120.97(15) |

|                      |            |
|----------------------|------------|
| C(316)-C(315)-H(315) | 119.5      |
| C(314)-C(315)-H(315) | 119.5      |
| C(317)-C(316)-C(315) | 117.18(14) |
| C(317)-C(316)-H(316) | 121.4      |
| C(315)-C(316)-H(316) | 121.4      |
| C(316)-C(317)-C(312) | 122.09(14) |
| C(316)-C(317)-C(318) | 129.06(14) |
| C(312)-C(317)-C(318) | 108.82(13) |
| O(304)-C(318)-N(301) | 128.01(14) |
| O(304)-C(318)-C(317) | 126.11(14) |
| N(301)-C(318)-C(317) | 105.87(12) |
| C(303)-C(302)-C(319) | 112.03(12) |
| C(303)-C(302)-C(301) | 103.46(12) |
| C(319)-C(302)-C(301) | 117.80(12) |
| C(303)-C(302)-H(302) | 107.7      |
| C(319)-C(302)-H(302) | 107.7      |
| C(301)-C(302)-H(302) | 107.7      |
| C(320)-C(319)-C(302) | 115.93(13) |
| C(320)-C(319)-H(31D) | 108.3      |
| C(302)-C(319)-H(31D) | 108.3      |
| C(320)-C(319)-H(31E) | 108.3      |
| C(302)-C(319)-H(31E) | 108.3      |
| H(31D)-C(319)-H(31E) | 107.4      |
| C(319)-C(320)-C(324) | 112.65(13) |
| C(319)-C(320)-C(321) | 111.17(13) |
| C(324)-C(320)-C(321) | 104.59(13) |
| C(319)-C(320)-H(320) | 109.4      |
| C(324)-C(320)-H(320) | 109.4      |
| C(321)-C(320)-H(320) | 109.4      |
| C(322)-C(321)-C(320) | 106.53(14) |
| C(322)-C(321)-H(32A) | 110.4      |
| C(320)-C(321)-H(32A) | 110.4      |
| C(322)-C(321)-H(32B) | 110.4      |
| C(320)-C(321)-H(32B) | 110.4      |
| H(32A)-C(321)-H(32B) | 108.6      |
| C(321)-C(322)-C(323) | 102.86(14) |

|                      |            |
|----------------------|------------|
| C(321)-C(322)-H(32C) | 111.2      |
| C(323)-C(322)-H(32C) | 111.2      |
| C(321)-C(322)-H(32D) | 111.2      |
| C(323)-C(322)-H(32D) | 111.2      |
| H(32C)-C(322)-H(32D) | 109.1      |
| C(322)-C(323)-C(324) | 102.78(13) |
| C(322)-C(323)-H(32E) | 111.2      |
| C(324)-C(323)-H(32E) | 111.2      |
| C(322)-C(323)-H(32F) | 111.2      |
| C(324)-C(323)-H(32F) | 111.2      |
| H(32E)-C(323)-H(32F) | 109.1      |
| C(323)-C(324)-C(320) | 105.08(13) |
| C(323)-C(324)-H(32G) | 110.7      |
| C(320)-C(324)-H(32G) | 110.7      |
| C(323)-C(324)-H(32H) | 110.7      |
| C(320)-C(324)-H(32H) | 110.7      |
| H(32G)-C(324)-H(32H) | 108.8      |
| O(305)-C(303)-C(302) | 108.55(12) |
| O(305)-C(303)-C(304) | 113.16(12) |
| C(302)-C(303)-C(304) | 103.72(12) |
| O(305)-C(303)-H(303) | 110.4      |
| C(302)-C(303)-H(303) | 110.4      |
| C(304)-C(303)-H(303) | 110.4      |
| C(303)-O(305)-H(305) | 108.3(16)  |
| O(306)-C(304)-C(325) | 109.96(12) |
| O(306)-C(304)-C(305) | 108.11(12) |
| C(325)-C(304)-C(305) | 115.43(12) |
| O(306)-C(304)-C(303) | 110.38(12) |
| C(325)-C(304)-C(303) | 110.68(12) |
| C(305)-C(304)-C(303) | 101.99(12) |
| C(304)-O(306)-H(306) | 110.2(16)  |
| O(307)-C(325)-O(308) | 124.71(16) |
| O(307)-C(325)-C(304) | 122.77(14) |
| O(308)-C(325)-C(304) | 112.37(13) |
| C(325)-O(308)-C(326) | 117.7(2)   |
| C(325)-O(308)-C(26D) | 122.8(18)  |

|                      |          |
|----------------------|----------|
| O(308)-C(326)-C(327) | 106.1(2) |
| O(308)-C(326)-C(328) | 108.4(2) |
| C(327)-C(326)-C(328) | 114.0(3) |
| O(308)-C(326)-H(326) | 109.4    |
| C(327)-C(326)-H(326) | 109.4    |
| C(328)-C(326)-H(326) | 109.4    |
| C(326)-C(327)-H(32I) | 109.5    |
| C(326)-C(327)-H(32J) | 109.5    |
| H(32I)-C(327)-H(32J) | 109.5    |
| C(326)-C(327)-H(32K) | 109.5    |
| H(32I)-C(327)-H(32K) | 109.5    |
| H(32J)-C(327)-H(32K) | 109.5    |
| C(326)-C(328)-H(32L) | 109.5    |
| C(326)-C(328)-H(32M) | 109.5    |
| H(32L)-C(328)-H(32M) | 109.5    |
| C(326)-C(328)-H(32N) | 109.5    |
| H(32L)-C(328)-H(32N) | 109.5    |
| H(32M)-C(328)-H(32N) | 109.5    |
| O(308)-C(26D)-C(28D) | 108(2)   |
| O(308)-C(26D)-C(27D) | 105(2)   |
| C(28D)-C(26D)-C(27D) | 114(3)   |
| O(308)-C(26D)-H(26D) | 109.8    |
| C(28D)-C(26D)-H(26D) | 109.8    |
| C(27D)-C(26D)-H(26D) | 109.8    |
| C(26D)-C(27D)-H(27J) | 109.5    |
| C(26D)-C(27D)-H(27K) | 109.5    |
| H(27J)-C(27D)-H(27K) | 109.5    |
| C(26D)-C(27D)-H(27L) | 109.5    |
| H(27J)-C(27D)-H(27L) | 109.5    |
| H(27K)-C(27D)-H(27L) | 109.5    |
| C(26D)-C(28D)-H(28J) | 109.5    |
| C(26D)-C(28D)-H(28K) | 109.5    |
| H(28J)-C(28D)-H(28K) | 109.5    |
| C(26D)-C(28D)-H(28L) | 109.5    |
| H(28J)-C(28D)-H(28L) | 109.5    |
| H(28K)-C(28D)-H(28L) | 109.5    |

|                      |            |
|----------------------|------------|
| C(304)-C(305)-C(301) | 106.93(12) |
| C(304)-C(305)-H(30G) | 110.3      |
| C(301)-C(305)-H(30G) | 110.3      |
| C(304)-C(305)-H(30H) | 110.3      |
| C(301)-C(305)-H(30H) | 110.3      |
| H(30G)-C(305)-H(30H) | 108.6      |
| H(1W)-O(1W)-H(2W)    | 103(4)     |

---

Symmetry transformations used to generate equivalent atoms:

Table 4. Anisotropic displacement parameters ( $\text{\AA}^2 \times 10^3$ ) for D11023. The anisotropic displacement factor exponent takes the form:  $-2\pi^2 [ h^2 a^{*2} U^{11} + \dots + 2 h k a^* b^* U^{12} ]$

|       | U <sup>11</sup> | U <sup>22</sup> | U <sup>33</sup> | U <sup>23</sup> | U <sup>13</sup> | U <sup>12</sup> |
|-------|-----------------|-----------------|-----------------|-----------------|-----------------|-----------------|
| C(1)  | 19(1)           | 19(1)           | 20(1)           | -10(1)          | -5(1)           | 3(1)            |
| C(6)  | 18(1)           | 20(1)           | 21(1)           | -10(1)          | -8(1)           | 3(1)            |
| O(1)  | 23(1)           | 25(1)           | 24(1)           | -15(1)          | -1(1)           | 1(1)            |
| O(2)  | 20(1)           | 19(1)           | 23(1)           | -11(1)          | -2(1)           | 1(1)            |
| C(7)  | 22(1)           | 18(1)           | 27(1)           | -9(1)           | -3(1)           | -3(1)           |
| C(8)  | 35(1)           | 23(1)           | 41(1)           | -16(1)          | -7(1)           | -2(1)           |
| C(9)  | 34(1)           | 27(1)           | 26(1)           | -8(1)           | -4(1)           | -1(1)           |
| C(10) | 23(1)           | 26(1)           | 47(1)           | -14(1)          | -8(1)           | -2(1)           |
| N(1)  | 18(1)           | 19(1)           | 20(1)           | -10(1)          | -5(1)           | 2(1)            |
| C(11) | 22(1)           | 19(1)           | 19(1)           | -8(1)           | -5(1)           | 0(1)            |
| O(3)  | 20(1)           | 32(1)           | 30(1)           | -18(1)          | -7(1)           | 3(1)            |
| C(12) | 25(1)           | 20(1)           | 20(1)           | -9(1)           | -3(1)           | -1(1)           |
| C(13) | 28(1)           | 28(1)           | 25(1)           | -14(1)          | -4(1)           | -4(1)           |
| C(14) | 35(1)           | 32(1)           | 25(1)           | -18(1)          | -3(1)           | -7(1)           |
| C(15) | 35(1)           | 28(1)           | 24(1)           | -16(1)          | 0(1)            | -1(1)           |
| C(16) | 27(1)           | 27(1)           | 22(1)           | -12(1)          | -4(1)           | 4(1)            |
| C(17) | 26(1)           | 18(1)           | 18(1)           | -7(1)           | -4(1)           | 0(1)            |
| C(18) | 22(1)           | 18(1)           | 16(1)           | -6(1)           | -3(1)           | 3(1)            |
| O(4)  | 20(1)           | 35(1)           | 24(1)           | -16(1)          | -6(1)           | 6(1)            |
| C(2)  | 18(1)           | 18(1)           | 20(1)           | -9(1)           | -5(1)           | 2(1)            |
| C(19) | 22(1)           | 19(1)           | 21(1)           | -9(1)           | -7(1)           | 3(1)            |
| C(20) | 25(1)           | 21(1)           | 21(1)           | -10(1)          | -6(1)           | 3(1)            |
| C(21) | 31(1)           | 22(1)           | 24(1)           | -9(1)           | -9(1)           | 6(1)            |
| C(22) | 40(1)           | 26(1)           | 30(1)           | -12(1)          | -14(1)          | 14(1)           |
| C(23) | 26(1)           | 41(1)           | 30(1)           | -17(1)          | -12(1)          | 14(1)           |
| C(24) | 24(1)           | 28(1)           | 30(1)           | -10(1)          | -6(1)           | 4(1)            |
| C(3)  | 20(1)           | 20(1)           | 20(1)           | -9(1)           | -6(1)           | 3(1)            |
| O(5)  | 25(1)           | 23(1)           | 27(1)           | -12(1)          | -10(1)          | 0(1)            |
| C(4)  | 21(1)           | 19(1)           | 19(1)           | -7(1)           | -6(1)           | 1(1)            |
| O(6)  | 24(1)           | 22(1)           | 19(1)           | -7(1)           | -4(1)           | 3(1)            |
| C(25) | 26(1)           | 21(1)           | 22(1)           | -10(1)          | -8(1)           | 3(1)            |



|        |       |       |       |        |        |        |
|--------|-------|-------|-------|--------|--------|--------|
| O(7)   | 68(1) | 20(1) | 21(1) | -7(1)  | -4(1)  | 9(1)   |
| O(8)   | 24(1) | 18(1) | 25(1) | -10(1) | -4(1)  | 4(1)   |
| C(26)  | 24(1) | 18(1) | 32(1) | -13(1) | -4(1)  | 4(1)   |
| C(27)  | 26(1) | 32(1) | 36(1) | -22(1) | -5(1)  | 4(1)   |
| C(28)  | 28(1) | 28(1) | 38(1) | -16(1) | -11(1) | 7(1)   |
| C(5)   | 22(1) | 19(1) | 22(1) | -10(1) | -8(1)  | 3(1)   |
| C(101) | 20(1) | 20(1) | 20(1) | -11(1) | -6(1)  | 2(1)   |
| C(106) | 20(1) | 26(1) | 19(1) | -12(1) | -4(1)  | 3(1)   |
| O(101) | 31(1) | 31(1) | 28(1) | -20(1) | -14(1) | 8(1)   |
| O(102) | 24(1) | 21(1) | 21(1) | -11(1) | -9(1)  | 5(1)   |
| C(107) | 27(1) | 23(1) | 21(1) | -10(1) | -10(1) | 8(1)   |
| C(108) | 34(1) | 24(1) | 30(1) | -12(1) | -10(1) | 5(1)   |
| C(109) | 37(1) | 37(1) | 22(1) | -11(1) | -10(1) | 12(1)  |
| C(110) | 28(1) | 31(1) | 34(1) | -17(1) | -14(1) | 9(1)   |
| N(101) | 18(1) | 21(1) | 18(1) | -10(1) | -5(1)  | 3(1)   |
| C(111) | 21(1) | 18(1) | 19(1) | -8(1)  | -6(1)  | 4(1)   |
| O(103) | 18(1) | 30(1) | 26(1) | -14(1) | -8(1)  | 4(1)   |
| C(112) | 23(1) | 18(1) | 17(1) | -6(1)  | -6(1)  | 4(1)   |
| C(113) | 21(1) | 26(1) | 22(1) | -11(1) | -6(1)  | 6(1)   |
| C(114) | 29(1) | 30(1) | 24(1) | -18(1) | -7(1)  | 10(1)  |
| C(115) | 31(1) | 34(1) | 28(1) | -21(1) | -12(1) | 6(1)   |
| C(116) | 23(1) | 32(1) | 24(1) | -16(1) | -9(1)  | 4(1)   |
| C(117) | 22(1) | 19(1) | 19(1) | -9(1)  | -5(1)  | 2(1)   |
| C(118) | 20(1) | 22(1) | 18(1) | -9(1)  | -6(1)  | 2(1)   |
| O(104) | 18(1) | 42(1) | 28(1) | -22(1) | -4(1)  | 2(1)   |
| C(102) | 20(1) | 23(1) | 20(1) | -11(1) | -5(1)  | 3(1)   |
| C(119) | 24(1) | 24(1) | 19(1) | -10(1) | -4(1)  | 3(1)   |
| C(120) | 31(1) | 26(1) | 22(1) | -8(1)  | -7(1)  | -3(1)  |
| C(121) | 38(3) | 36(3) | 29(2) | -4(2)  | -12(2) | -2(2)  |
| C(122) | 53(3) | 34(2) | 38(4) | -8(2)  | -13(2) | -15(2) |
| C(123) | 38(2) | 48(2) | 36(2) | -14(2) | -7(2)  | -11(1) |
| C(124) | 28(2) | 33(2) | 29(3) | -12(2) | -9(2)  | 1(2)   |
| C(21B) | 36(4) | 17(3) | 28(4) | -10(2) | -5(3)  | -13(3) |
| C(22B) | 35(4) | 38(4) | 26(5) | -7(3)  | -2(3)  | -12(3) |
| C(23B) | 29(3) | 47(4) | 42(5) | -11(3) | 3(3)   | -8(2)  |
| C(24B) | 36(4) | 43(5) | 19(4) | -6(4)  | -7(3)  | -12(4) |

|        |       |        |       |        |        |        |
|--------|-------|--------|-------|--------|--------|--------|
| C(103) | 22(1) | 23(1)  | 20(1) | -11(1) | -6(1)  | 4(1)   |
| O(105) | 25(1) | 23(1)  | 26(1) | -14(1) | -1(1)  | 4(1)   |
| C(104) | 21(1) | 23(1)  | 18(1) | -10(1) | -6(1)  | 3(1)   |
| O(106) | 20(1) | 26(1)  | 20(1) | -10(1) | -5(1)  | 2(1)   |
| O(107) | 39(1) | 22(1)  | 36(1) | -11(1) | -15(1) | 4(1)   |
| C(125) | 22(1) | 24(1)  | 22(1) | -12(1) | -3(1)  | 3(1)   |
| O(108) | 38(1) | 23(1)  | 31(1) | -13(1) | -15(1) | 0(1)   |
| C(126) | 38(3) | 24(3)  | 41(3) | -18(2) | -17(2) | 1(2)   |
| C(127) | 33(3) | 31(3)  | 60(5) | -25(4) | -21(3) | 4(2)   |
| C(128) | 89(7) | 46(3)  | 50(3) | -29(3) | -36(4) | 5(5)   |
| C(26B) | 38(5) | 29(5)  | 45(4) | -27(4) | -18(4) | 8(4)   |
| C(27B) | 31(5) | 37(10) | 43(5) | -19(5) | -10(4) | -2(5)  |
| C(28B) | 52(8) | 51(9)  | 41(4) | -29(5) | -10(5) | -12(6) |
| C(105) | 21(1) | 20(1)  | 22(1) | -10(1) | -4(1)  | 1(1)   |
| C(201) | 22(1) | 18(1)  | 20(1) | -9(1)  | -5(1)  | 2(1)   |
| C(206) | 21(1) | 20(1)  | 21(1) | -10(1) | -7(1)  | 2(1)   |
| O(201) | 29(1) | 22(1)  | 26(1) | -10(1) | -2(1)  | -3(1)  |
| O(202) | 24(1) | 22(1)  | 19(1) | -10(1) | -3(1)  | 1(1)   |
| C(207) | 25(1) | 30(1)  | 19(1) | -11(1) | -2(1)  | 2(1)   |
| C(208) | 47(1) | 35(1)  | 26(1) | -18(1) | -2(1)  | 8(1)   |
| C(209) | 34(1) | 34(1)  | 20(1) | -8(1)  | -4(1)  | 2(1)   |
| C(210) | 24(1) | 50(1)  | 30(1) | -17(1) | -1(1)  | 1(1)   |
| N(201) | 19(1) | 19(1)  | 20(1) | -8(1)  | -4(1)  | 2(1)   |
| C(211) | 22(1) | 22(1)  | 18(1) | -10(1) | -4(1)  | 3(1)   |
| O(203) | 21(1) | 24(1)  | 29(1) | -11(1) | -8(1)  | 1(1)   |
| C(212) | 21(1) | 23(1)  | 16(1) | -9(1)  | -2(1)  | 2(1)   |
| C(213) | 21(1) | 24(1)  | 19(1) | -9(1)  | -4(1)  | 4(1)   |
| C(214) | 27(1) | 24(1)  | 20(1) | -6(1)  | -4(1)  | 6(1)   |
| C(215) | 30(1) | 22(1)  | 22(1) | -7(1)  | -2(1)  | -1(1)  |
| C(216) | 24(1) | 23(1)  | 24(1) | -10(1) | -3(1)  | -1(1)  |
| C(217) | 22(1) | 23(1)  | 18(1) | -9(1)  | -2(1)  | 1(1)   |
| C(218) | 21(1) | 22(1)  | 19(1) | -11(1) | -3(1)  | 2(1)   |
| O(204) | 24(1) | 23(1)  | 34(1) | -11(1) | -12(1) | 2(1)   |
| C(202) | 20(1) | 20(1)  | 20(1) | -7(1)  | -5(1)  | 1(1)   |
| C(219) | 26(1) | 22(1)  | 22(1) | -9(1)  | -8(1)  | 2(1)   |
| C(220) | 29(1) | 26(1)  | 26(1) | -8(1)  | -11(1) | 1(1)   |

|        |        |       |       |        |        |        |
|--------|--------|-------|-------|--------|--------|--------|
| C(221) | 45(1)  | 36(1) | 30(1) | -10(1) | -20(1) | -1(1)  |
| C(222) | 55(2)  | 43(3) | 54(2) | -13(1) | -37(1) | 4(1)   |
| C(223) | 66(3)  | 50(3) | 71(2) | 0(2)   | -41(2) | -21(2) |
| C(22C) | 55(2)  | 43(3) | 54(2) | -13(1) | -37(1) | 4(1)   |
| C(23C) | 66(3)  | 50(3) | 71(2) | 0(2)   | -41(2) | -21(2) |
| C(224) | 30(1)  | 41(1) | 41(1) | -1(1)  | -13(1) | -5(1)  |
| C(203) | 24(1)  | 20(1) | 21(1) | -8(1)  | -6(1)  | 3(1)   |
| O(205) | 26(1)  | 26(1) | 30(1) | -14(1) | -10(1) | 8(1)   |
| C(204) | 25(1)  | 26(1) | 20(1) | -11(1) | -6(1)  | 3(1)   |
| O(206) | 26(1)  | 42(1) | 21(1) | -12(1) | -2(1)  | 2(1)   |
| C(225) | 23(2)  | 24(2) | 21(2) | -8(2)  | -9(1)  | 7(2)   |
| O(207) | 31(2)  | 43(2) | 34(2) | -28(2) | -12(1) | 13(2)  |
| O(208) | 38(3)  | 22(1) | 30(2) | -15(2) | -9(2)  | 1(2)   |
| C(226) | 49(3)  | 23(2) | 47(3) | -20(2) | -23(2) | 2(2)   |
| C(227) | 76(4)  | 29(2) | 49(3) | -12(2) | -27(3) | -13(2) |
| C(228) | 70(4)  | 54(3) | 55(3) | -39(3) | -34(3) | 8(3)   |
| C(25C) | 26(6)  | 22(6) | 24(7) | -16(5) | -8(4)  | 4(3)   |
| O(07C) | 28(4)  | 28(5) | 33(5) | -17(4) | -6(3)  | 7(3)   |
| O(08C) | 33(5)  | 24(3) | 32(5) | -13(3) | -3(3)  | -2(3)  |
| C(26C) | 38(6)  | 20(3) | 35(5) | -11(4) | -3(4)  | 0(4)   |
| C(27C) | 58(7)  | 42(5) | 44(5) | -21(4) | 10(5)  | -16(5) |
| C(28C) | 85(11) | 43(6) | 46(5) | -24(6) | -18(6) | -8(7)  |
| C(205) | 24(1)  | 21(1) | 22(1) | -11(1) | -7(1)  | 2(1)   |
| C(301) | 18(1)  | 17(1) | 20(1) | -8(1)  | -3(1)  | 1(1)   |
| C(306) | 15(1)  | 18(1) | 20(1) | -8(1)  | -1(1)  | 0(1)   |
| O(301) | 27(1)  | 18(1) | 25(1) | -9(1)  | -9(1)  | 4(1)   |
| O(302) | 20(1)  | 18(1) | 18(1) | -8(1)  | -5(1)  | 1(1)   |
| C(307) | 24(1)  | 20(1) | 21(1) | -9(1)  | -9(1)  | 1(1)   |
| C(308) | 33(1)  | 26(1) | 27(1) | -14(1) | -11(1) | 2(1)   |
| C(309) | 33(1)  | 25(1) | 19(1) | -5(1)  | -7(1)  | -1(1)  |
| C(310) | 23(1)  | 29(1) | 32(1) | -15(1) | -11(1) | 3(1)   |
| N(301) | 17(1)  | 18(1) | 18(1) | -8(1)  | -3(1)  | 2(1)   |
| C(311) | 18(1)  | 23(1) | 15(1) | -10(1) | -2(1)  | 0(1)   |
| O(303) | 18(1)  | 21(1) | 23(1) | -7(1)  | -4(1)  | 3(1)   |
| C(312) | 21(1)  | 21(1) | 16(1) | -10(1) | -4(1)  | 2(1)   |
| C(313) | 22(1)  | 23(1) | 20(1) | -9(1)  | -4(1)  | 0(1)   |

|        |        |       |       |        |        |        |
|--------|--------|-------|-------|--------|--------|--------|
| C(314) | 27(1)  | 20(1) | 24(1) | -9(1)  | -2(1)  | -2(1)  |
| C(315) | 31(1)  | 20(1) | 22(1) | -7(1)  | -4(1)  | 4(1)   |
| C(316) | 22(1)  | 24(1) | 22(1) | -8(1)  | -6(1)  | 6(1)   |
| C(317) | 22(1)  | 20(1) | 17(1) | -9(1)  | -4(1)  | 2(1)   |
| C(318) | 21(1)  | 20(1) | 18(1) | -9(1)  | -4(1)  | 2(1)   |
| O(304) | 19(1)  | 24(1) | 32(1) | -10(1) | -10(1) | 2(1)   |
| C(302) | 17(1)  | 18(1) | 22(1) | -9(1)  | -4(1)  | 1(1)   |
| C(319) | 20(1)  | 22(1) | 22(1) | -10(1) | -3(1)  | -2(1)  |
| C(320) | 21(1)  | 25(1) | 22(1) | -12(1) | -3(1)  | -1(1)  |
| C(321) | 27(1)  | 36(1) | 24(1) | -18(1) | -4(1)  | 2(1)   |
| C(322) | 30(1)  | 39(1) | 30(1) | -19(1) | -1(1)  | 5(1)   |
| C(323) | 21(1)  | 42(1) | 32(1) | -18(1) | -4(1)  | 4(1)   |
| C(324) | 22(1)  | 28(1) | 27(1) | -14(1) | -6(1)  | 4(1)   |
| C(303) | 18(1)  | 20(1) | 20(1) | -10(1) | -5(1)  | 1(1)   |
| O(305) | 19(1)  | 23(1) | 34(1) | -17(1) | -6(1)  | -1(1)  |
| C(304) | 20(1)  | 20(1) | 20(1) | -9(1)  | -7(1)  | 3(1)   |
| O(306) | 23(1)  | 24(1) | 21(1) | -8(1)  | -7(1)  | 2(1)   |
| O(307) | 34(1)  | 35(1) | 35(1) | -24(1) | -14(1) | 7(1)   |
| C(325) | 18(1)  | 24(1) | 21(1) | -10(1) | -2(1)  | 0(1)   |
| O(308) | 40(1)  | 29(1) | 38(1) | -22(1) | -21(1) | 15(1)  |
| C(326) | 46(2)  | 32(1) | 53(1) | -29(1) | -26(1) | 18(1)  |
| C(327) | 134(5) | 47(2) | 73(2) | -34(2) | -64(2) | 51(3)  |
| C(328) | 56(2)  | 59(3) | 85(2) | -45(2) | -14(2) | 29(2)  |
| C(26D) | 46(2)  | 32(1) | 53(1) | -29(1) | -26(1) | 18(1)  |
| C(27D) | 134(5) | 47(2) | 73(2) | -34(2) | -64(2) | 51(3)  |
| C(28D) | 56(2)  | 59(3) | 85(2) | -45(2) | -14(2) | 29(2)  |
| C(305) | 18(1)  | 21(1) | 23(1) | -13(1) | -4(1)  | 3(1)   |
| O(1W)  | 85(3)  | 66(3) | 59(2) | -23(2) | -16(2) | -16(2) |

---

Table 5. Hydrogen coordinates ( $\times 10^4$ ) and isotropic displacement parameters ( $\text{\AA}^2 \times 10^{-3}$ ) for D11023.

|        | x        | y        | z        | U(eq) |
|--------|----------|----------|----------|-------|
| H(8A)  | 3669     | 11589    | 2984     | 49    |
| H(8B)  | 4992     | 12005    | 2560     | 49    |
| H(8C)  | 4574     | 11238    | 3593     | 49    |
| H(9A)  | 4685     | 10402    | 1578     | 47    |
| H(9B)  | 5115     | 11478    | 1311     | 47    |
| H(9C)  | 3775     | 11115    | 1725     | 47    |
| H(10A) | 5918     | 10064    | 3412     | 49    |
| H(10B) | 6482     | 10857    | 2411     | 49    |
| H(10C) | 6041     | 9824     | 2560     | 49    |
| H(13)  | 4226     | 9367     | 6481     | 32    |
| H(14)  | 3044     | 9935     | 7453     | 36    |
| H(15)  | 1108     | 10069    | 7487     | 35    |
| H(16)  | 258      | 9608     | 6574     | 30    |
| H(2)   | 1030     | 8262     | 4222     | 22    |
| H(19A) | 2462     | 9518     | 2547     | 24    |
| H(19B) | 1418     | 8945     | 2482     | 24    |
| H(20)  | 1072     | 10063    | 3491     | 26    |
| H(21A) | 1590     | 11250    | 2028     | 31    |
| H(21B) | 938      | 10667    | 1643     | 31    |
| H(22A) | -405     | 11691    | 1879     | 37    |
| H(22B) | -149     | 11504    | 2837     | 37    |
| H(23A) | -1428    | 10236    | 2460     | 38    |
| H(23B) | -1720    | 10413    | 3361     | 38    |
| H(24A) | -525     | 8980     | 3180     | 34    |
| H(24B) | -673     | 9243     | 4025     | 34    |
| H(3)   | 2456     | 7475     | 3120     | 23    |
| H(5)   | 327(18)  | 6874(16) | 4115(12) | 35    |
| H(6)   | 1231(19) | 6145(14) | 5695(12) | 34    |
| H(26)  | 3068     | 4422     | 4193     | 29    |
| H(27A) | 2789     | 5171     | 2706     | 44    |

|        |       |      |       |    |
|--------|-------|------|-------|----|
| H(27B) | 3790  | 4478 | 2748  | 44 |
| H(27C) | 4108  | 5601 | 2324  | 44 |
| H(28A) | 5277  | 5500 | 3437  | 46 |
| H(28B) | 5104  | 4368 | 3831  | 46 |
| H(28C) | 4726  | 4873 | 4494  | 46 |
| H(5A)  | 3861  | 7263 | 4203  | 24 |
| H(5B)  | 3169  | 7103 | 5206  | 24 |
| H(10D) | 2552  | 365  | 8937  | 43 |
| H(10E) | 3790  | 73   | 9100  | 43 |
| H(10F) | 3685  | 838  | 8129  | 43 |
| H(10G) | 2932  | 1591 | 10238 | 48 |
| H(10H) | 3298  | 545  | 10436 | 48 |
| H(10I) | 2089  | 829  | 10202 | 48 |
| H(11A) | 4980  | 2116 | 8151  | 43 |
| H(11B) | 5188  | 1273 | 9046  | 43 |
| H(11C) | 4768  | 2242 | 9070  | 43 |
| H(113) | 4556  | 2632 | 5337  | 27 |
| H(114) | 3809  | 2122 | 4412  | 31 |
| H(115) | 1845  | 2003 | 4540  | 33 |
| H(116) | 541   | 2404 | 5591  | 30 |
| H(102) | 252   | 3618 | 8070  | 24 |
| H(11D) | 1026  | 2433 | 9610  | 26 |
| H(11E) | -154  | 2888 | 9777  | 26 |
| H(20A) | 232   | 1740 | 8822  | 32 |
| H(20B) | 176   | 1689 | 8837  | 32 |
| H(12A) | 28    | 622  | 10373 | 45 |
| H(12B) | -932  | 1194 | 10737 | 45 |
| H(12C) | -1229 | 64   | 9801  | 53 |
| H(12D) | -2057 | -2   | 10734 | 53 |
| H(12E) | -2989 | 1218 | 10011 | 51 |
| H(12F) | -2464 | 1021 | 9137  | 51 |
| H(12G) | -1814 | 2555 | 9435  | 36 |
| H(12H) | -1461 | 2449 | 8498  | 36 |
| H(21C) | 143   | 513  | 10106 | 33 |
| H(21D) | -433  | 1058 | 10706 | 33 |
| H(22C) | -1609 | 84   | 9967  | 43 |

|        |          |          |          |    |
|--------|----------|----------|----------|----|
| H(22D) | -2026    | 86       | 10952    | 43 |
| H(23C) | -2564    | 1613     | 10350    | 53 |
| H(23D) | -2978    | 1165     | 9748     | 53 |
| H(24C) | -1423    | 1917     | 8535     | 42 |
| H(24D) | -1602    | 2704     | 8929     | 42 |
| H(103) | 1325     | 4397     | 9020     | 25 |
| H(105) | -220(20) | 5204(13) | 8857(16) | 37 |
| H(106) | 237(15)  | 5456(16) | 7205(14) | 33 |
| H(126) | 2622     | 7371     | 7982     | 38 |
| H(12I) | 4197     | 7246     | 6914     | 57 |
| H(12J) | 4750     | 6559     | 7707     | 57 |
| H(12K) | 4666     | 7649     | 7520     | 57 |
| H(12L) | 2385     | 6417     | 9541     | 83 |
| H(12M) | 3538     | 7117     | 9174     | 83 |
| H(12N) | 3613     | 6030     | 9348     | 83 |
| H(26B) | 2791     | 7346     | 8018     | 38 |
| H(27D) | 4176     | 7111     | 6850     | 54 |
| H(27E) | 4862     | 6538     | 7593     | 54 |
| H(27F) | 4730     | 7641     | 7322     | 54 |
| H(28D) | 2703     | 6239     | 9537     | 67 |
| H(28E) | 3829     | 6974     | 9133     | 67 |
| H(28F) | 3929     | 5923     | 9200     | 67 |
| H(10J) | 3196     | 4720     | 7640     | 25 |
| H(10K) | 2841     | 4865     | 6728     | 25 |
| H(20C) | 6047     | 9300     | 10639    | 54 |
| H(20D) | 4774     | 9003     | 11292    | 54 |
| H(20E) | 4954     | 9536     | 10217    | 54 |
| H(20F) | 5772     | 6804     | 11342    | 46 |
| H(20G) | 5246     | 7294     | 11997    | 46 |
| H(20H) | 6517     | 7645     | 11347    | 46 |
| H(21E) | 3828     | 8237     | 10138    | 54 |
| H(21F) | 3503     | 7753     | 11222    | 54 |
| H(21G) | 4070     | 7160     | 10676    | 54 |
| H(213) | 5220     | 11088    | 6704     | 26 |
| H(214) | 5971     | 12675    | 6168     | 30 |
| H(215) | 7720     | 13034    | 6387     | 32 |

|        |           |          |          |    |
|--------|-----------|----------|----------|----|
| H(216) | 8771      | 11812    | 7170     | 29 |
| H(202) | 9046      | 8254     | 8372     | 25 |
| H(21H) | 8244      | 8257     | 9814     | 28 |
| H(21I) | 7837      | 7153     | 10227    | 28 |
| H(220) | 9794      | 6810     | 10004    | 33 |
| H(21J) | 8995      | 7766     | 11138    | 44 |
| H(21K) | 9141      | 6652     | 11458    | 44 |
| H(21L) | 9085      | 7814     | 11121    | 44 |
| H(21M) | 9074      | 6677     | 11467    | 44 |
| H(22E) | 11126     | 6912     | 11100    | 59 |
| H(22F) | 10701     | 7615     | 11569    | 59 |
| H(22G) | 12008     | 8337     | 9956     | 81 |
| H(22H) | 10968     | 8915     | 10204    | 81 |
| H(22I) | 11624     | 8663     | 10048    | 59 |
| H(22J) | 12090     | 7785     | 9846     | 59 |
| H(23E) | 10846     | 7598     | 11457    | 81 |
| H(23F) | 11038     | 6730     | 11175    | 81 |
| H(24I) | 10304     | 8793     | 9103     | 50 |
| H(24J) | 11143     | 7994     | 9056     | 50 |
| H(24K) | 10973     | 8122     | 8913     | 50 |
| H(24L) | 10312     | 8831     | 9293     | 50 |
| H(203) | 8041      | 6321     | 9208     | 26 |
| H(205) | 10116(19) | 6928(16) | 8090(12) | 39 |
| H(206) | 9250(20)  | 7521(18) | 6706(15) | 46 |
| H(226) | 7819      | 4432     | 8146     | 43 |
| H(22K) | 6524      | 4021     | 9566     | 76 |
| H(22L) | 6081      | 3446     | 9085     | 76 |
| H(22M) | 5480      | 4363     | 9099     | 76 |
| H(22N) | 7214      | 5211     | 6800     | 76 |
| H(22O) | 5911      | 5103     | 7367     | 76 |
| H(22P) | 6515      | 4183     | 7365     | 76 |
| H(26C) | 7343      | 4257     | 8502     | 39 |
| H(27G) | 5999      | 4098     | 9825     | 77 |
| H(27H) | 5477      | 3495     | 9402     | 77 |
| H(27I) | 5044      | 4509     | 9274     | 77 |
| H(28G) | 6939      | 5018     | 7083     | 84 |



|        |           |          |          |     |
|--------|-----------|----------|----------|-----|
| H(28H) | 5636      | 5085     | 7546     | 84  |
| H(28I) | 6075      | 4073     | 7673     | 84  |
| H(20I) | 6396      | 7078     | 8295     | 26  |
| H(20J) | 6950      | 8019     | 7391     | 26  |
| H(30A) | 8340      | 2932     | 1216     | 41  |
| H(30B) | 7163      | 3035     | 906      | 41  |
| H(30C) | 7151      | 2435     | 1949     | 41  |
| H(30D) | 7877      | 5313     | 836      | 40  |
| H(30E) | 7706      | 4829     | 195      | 40  |
| H(30F) | 8817      | 4666     | 595      | 40  |
| H(31A) | 5728      | 3505     | 2425     | 40  |
| H(31B) | 5690      | 3976     | 1384     | 40  |
| H(31C) | 6005      | 4628     | 1840     | 40  |
| H(313) | 5526      | 698      | 4923     | 26  |
| H(314) | 6086      | -843     | 5586     | 29  |
| H(315) | 7969      | -1075    | 5724     | 30  |
| H(316) | 9356      | 232      | 5176     | 28  |
| H(302) | 10093     | 3832     | 3584     | 22  |
| H(31D) | 9778      | 4882     | 1805     | 26  |
| H(31E) | 10975     | 5005     | 2023     | 26  |
| H(320) | 10057     | 3195     | 2270     | 26  |
| H(32A) | 10546     | 3726     | 759      | 33  |
| H(32B) | 11141     | 4715     | 617      | 33  |
| H(32C) | 12758     | 4082     | 162      | 39  |
| H(32D) | 12219     | 3008     | 836      | 39  |
| H(32E) | 13053     | 4382     | 1358     | 38  |
| H(32F) | 13442     | 3326     | 1604     | 38  |
| H(32G) | 11871     | 3547     | 2804     | 30  |
| H(32H) | 11691     | 2623     | 2631     | 30  |
| H(303) | 9370      | 5716     | 2917     | 23  |
| H(305) | 10770(20) | 5939(13) | 3411(16) | 36  |
| H(306) | 9818(14)  | 4352(13) | 4963(15) | 35  |
| H(326) | 8042      | 7356     | 4223     | 45  |
| H(32I) | 7948      | 7874     | 2725     | 113 |
| H(32J) | 6989      | 8341     | 3211     | 113 |
| H(32K) | 6627      | 7456     | 3045     | 113 |

|        |          |          |          |     |
|--------|----------|----------|----------|-----|
| H(32L) | 6512     | 6401     | 5434     | 94  |
| H(32M) | 5715     | 6539     | 4755     | 94  |
| H(32N) | 6094     | 7421     | 4916     | 94  |
| H(26D) | 7657     | 7369     | 4279     | 45  |
| H(27J) | 7396     | 7682     | 2793     | 113 |
| H(27K) | 6498     | 8146     | 3326     | 113 |
| H(27L) | 6108     | 7192     | 3283     | 113 |
| H(28J) | 6432     | 6105     | 5525     | 94  |
| H(28K) | 5600     | 6118     | 4903     | 94  |
| H(28L) | 5723     | 7000     | 5139     | 94  |
| H(30G) | 7215     | 4742     | 3943     | 24  |
| H(30H) | 7372     | 3786     | 4777     | 24  |
| H(1W)  | 8670(70) | 6990(40) | 5390(50) | 108 |
| H(2W)  | 9460(50) | 7770(50) | 5130(40) | 108 |

---

Table 6. Hydrogen bonds for D11023 [Å and °].

| D-H...A                  | d(D-H)    | d(H...A)  | d(D...A)   | <(DHA)    |
|--------------------------|-----------|-----------|------------|-----------|
| O(5)-H(5)...O(6)         | 0.845(16) | 2.18(2)   | 2.6709(15) | 117.0(18) |
| O(5)-H(5)...O(307)#1     | 0.845(16) | 2.284(19) | 3.0061(17) | 144(2)    |
| O(6)-H(6)...O(106)       | 0.824(16) | 1.929(18) | 2.7046(15) | 156(2)    |
| O(105)-H(105)...O(205)#1 | 0.817(17) | 2.029(18) | 2.8259(17) | 165(2)    |
| O(106)-H(106)...O(207)#1 | 0.834(16) | 2.036(18) | 2.793(4)   | 151(2)    |
| O(106)-H(106)...O(07C)#1 | 0.834(16) | 2.06(2)   | 2.863(10)  | 161(2)    |
| O(106)-H(106)...O(105)   | 0.834(16) | 2.40(2)   | 2.8210(15) | 111.7(17) |
| O(205)-H(205)...O(206)   | 0.829(16) | 2.31(2)   | 2.7410(16) | 112.5(19) |
| O(205)-H(205)...O(107)#2 | 0.829(16) | 2.34(2)   | 3.0293(18) | 140(2)    |
| O(206)-H(206)...O(207)   | 0.831(17) | 2.07(3)   | 2.572(6)   | 118(2)    |
| O(206)-H(206)...O(1W)    | 0.831(17) | 2.15(2)   | 2.849(4)   | 141(2)    |
| O(206)-H(206)...O(07C)   | 0.831(17) | 2.53(3)   | 2.931(13)  | 111(2)    |
| O(305)-H(305)...O(5)#2   | 0.821(16) | 1.931(17) | 2.7453(17) | 171(2)    |
| O(306)-H(306)...O(305)   | 0.781(16) | 2.40(2)   | 2.7945(15) | 112.4(19) |
| O(1W)-H(1W)...O(307)     | 0.90(2)   | 2.05(3)   | 2.927(5)   | 164(8)    |
| O(1W)-H(2W)...O(4)#2     | 0.89(2)   | 2.20(6)   | 2.795(4)   | 123(6)    |

Symmetry transformations used to generate equivalent atoms:

#1  $x-1, y, z$     #2  $x+1, y, z$

Absolute configuration of the products from cycloaddition of the phosphorus-substituted olefin: Hydrolysis product (carboxylic acid) of Table 4, entry 1, derived from catalyst (S)-1.

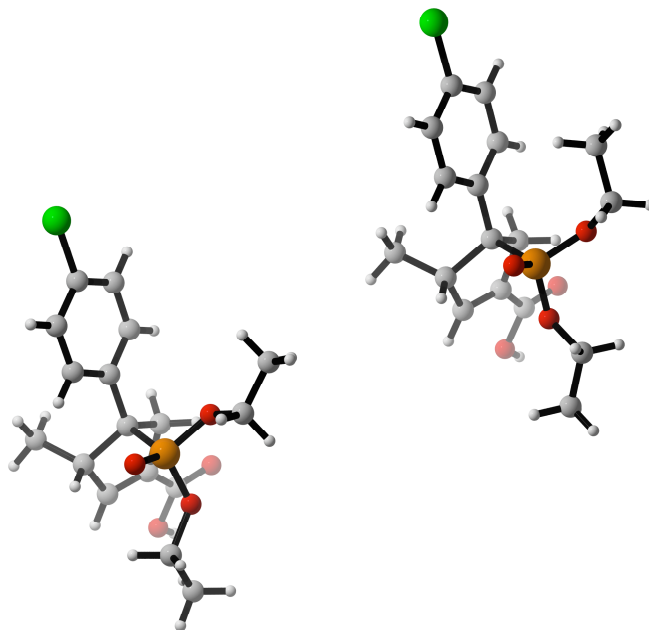

Table 1. Crystal data and structure refinement for D11020.

|                        |                                                     |                   |
|------------------------|-----------------------------------------------------|-------------------|
| Identification code    | d11020                                              |                   |
| Empirical formula      | C <sub>17</sub> H <sub>22</sub> Cl O <sub>5</sub> P |                   |
| Formula weight         | 372.77                                              |                   |
| Temperature            | 100(2) K                                            |                   |
| Wavelength             | 1.54178 Å                                           |                   |
| Crystal system         | Monoclinic                                          |                   |
| Space group            | P2(1)                                               |                   |
| Unit cell dimensions   | a = 13.1781(3) Å                                    | a = 90°.          |
|                        | b = 9.1516(2) Å                                     | b = 99.3710(10)°. |
|                        | c = 15.7055(3) Å                                    | g = 90°.          |
| Volume                 | 1868.82(7) Å <sup>3</sup>                           |                   |
| Z                      | 4                                                   |                   |
| Density (calculated)   | 1.325 Mg/m <sup>3</sup>                             |                   |
| Absorption coefficient | 2.822 mm <sup>-1</sup>                              |                   |
| F(000)                 | 784                                                 |                   |
| Crystal size           | 0.35 x 0.20 x 0.10 mm <sup>3</sup>                  |                   |

|                                   |                                             |
|-----------------------------------|---------------------------------------------|
| Theta range for data collection   | 2.85 to 69.31°.                             |
| Index ranges                      | -15<=h<=15, -11<=k<=10, -19<=l<=19          |
| Reflections collected             | 40092                                       |
| Independent reflections           | 6681 [R(int) = 0.0260]                      |
| Completeness to theta = 69.31°    | 100.0 %                                     |
| Absorption correction             | Semi-empirical from equivalents             |
| Max. and min. transmission        | 0.7656 and 0.4384                           |
| Refinement method                 | Full-matrix least-squares on F <sup>2</sup> |
| Data / restraints / parameters    | 6681 / 1 / 441                              |
| Goodness-of-fit on F <sup>2</sup> | 1.041                                       |
| Final R indices [I>2sigma(I)]     | R1 = 0.0266, wR2 = 0.0708                   |
| R indices (all data)              | R1 = 0.0270, wR2 = 0.0712                   |
| Absolute structure parameter      | 0.010(8)                                    |
| Largest diff. peak and hole       | 0.304 and -0.400 e.Å <sup>-3</sup>          |

Table 2. Atomic coordinates ( $\times 10^4$ ) and equivalent isotropic displacement parameters ( $\text{\AA}^2 \times 10^3$ ) for D11020.  $U(\text{eq})$  is defined as one-third of the trace of the orthogonalized  $U^{ij}$  tensor.

|        | x       | y       | z        | $U(\text{eq})$ |
|--------|---------|---------|----------|----------------|
| P(1)   | 1590(1) | 3175(1) | 8900(1)  | 15(1)          |
| O(1)   | 1011(1) | 1850(1) | 9075(1)  | 20(1)          |
| O(2)   | 2518(1) | 2924(1) | 8407(1)  | 19(1)          |
| C(1)   | 2443(1) | 1825(2) | 7717(1)  | 23(1)          |
| C(2)   | 3498(2) | 1397(3) | 7598(1)  | 39(1)          |
| O(3)   | 882(1)  | 4304(1) | 8315(1)  | 19(1)          |
| C(3)   | -232(1) | 4304(2) | 8281(1)  | 25(1)          |
| C(4)   | -635(1) | 5733(2) | 7897(1)  | 28(1)          |
| C(5)   | 2207(1) | 4134(2) | 9872(1)  | 16(1)          |
| C(11)  | 2980(1) | 3046(2) | 10341(1) | 17(1)          |
| C(12)  | 2631(1) | 1790(2) | 10710(1) | 20(1)          |
| C(13)  | 3306(1) | 749(2)  | 11111(1) | 23(1)          |
| C(14)  | 4353(1) | 966(2)  | 11145(1) | 23(1)          |
| Cl(1)  | 5212(1) | -342(1) | 11651(1) | 29(1)          |
| C(15)  | 4733(1) | 2191(2) | 10786(1) | 22(1)          |
| C(16)  | 4042(1) | 3217(2) | 10381(1) | 19(1)          |
| C(6)   | 2671(1) | 5599(2) | 9610(1)  | 17(1)          |
| C(7)   | 1823(1) | 6689(2) | 9656(1)  | 17(1)          |
| C(17)  | 1892(1) | 8197(2) | 9326(1)  | 19(1)          |
| O(4)   | 2588(1) | 8602(1) | 8965(1)  | 29(1)          |
| O(5)   | 1114(1) | 9042(1) | 9468(1)  | 25(1)          |
| C(8)   | 1091(1) | 6150(2) | 10058(1) | 18(1)          |
| C(9)   | 1333(1) | 4627(2) | 10393(1) | 17(1)          |
| C(10)  | 1670(1) | 4727(2) | 11375(1) | 24(1)          |
| P(2)   | 6717(1) | 2271(1) | 4193(1)  | 15(1)          |
| O(101) | 6250(1) | 838(1)  | 4334(1)  | 20(1)          |
| O(102) | 7566(1) | 2201(1) | 3598(1)  | 21(1)          |
| C(101) | 7914(1) | 852(2)  | 3232(1)  | 23(1)          |
| C(102) | 8885(1) | 305(2)  | 3774(1)  | 23(1)          |
| O(103) | 5909(1) | 3423(1) | 3758(1)  | 20(1)          |
| C(103) | 5228(1) | 3029(2) | 2965(1)  | 23(1)          |

|        |          |         |         |       |
|--------|----------|---------|---------|-------|
| C(104) | 4277(1)  | 3950(3) | 2900(1) | 35(1) |
| C(105) | 7314(1)  | 3211(2) | 5176(1) | 16(1) |
| C(111) | 8128(1)  | 2163(2) | 5622(1) | 16(1) |
| C(112) | 7836(1)  | 877(2)  | 6005(1) | 18(1) |
| C(113) | 8562(1)  | -101(2) | 6403(1) | 20(1) |
| C(114) | 9597(1)  | 204(2)  | 6427(1) | 20(1) |
| Cl(2)  | 10518(1) | -998(1) | 6954(1) | 27(1) |
| C(115) | 9915(1)  | 1439(2) | 6033(1) | 20(1) |
| C(116) | 9174(1)  | 2401(2) | 5629(1) | 18(1) |
| C(106) | 7749(1)  | 4712(2) | 4934(1) | 17(1) |
| C(107) | 6898(1)  | 5763(2) | 5019(1) | 18(1) |
| C(117) | 6955(1)  | 7276(2) | 4704(1) | 18(1) |
| O(104) | 7655(1)  | 7694(1) | 4354(1) | 25(1) |
| O(105) | 6174(1)  | 8123(1) | 4841(1) | 25(1) |
| C(108) | 6175(1)  | 5174(2) | 5415(1) | 19(1) |
| C(109) | 6431(1)  | 3630(2) | 5706(1) | 18(1) |
| C(110) | 6763(1)  | 3641(2) | 6693(1) | 26(1) |

---

Table 3. Bond lengths [ $\text{\AA}$ ] and angles [ $^\circ$ ] for D11020.

---

|             |            |
|-------------|------------|
| P(1)-O(1)   | 1.4825(12) |
| P(1)-O(2)   | 1.5673(11) |
| P(1)-O(3)   | 1.5823(12) |
| P(1)-C(5)   | 1.8324(16) |
| O(2)-C(1)   | 1.469(2)   |
| C(1)-C(2)   | 1.485(2)   |
| C(1)-H(1A)  | 0.9900     |
| C(1)-H(1B)  | 0.9900     |
| C(2)-H(2A)  | 0.9800     |
| C(2)-H(2B)  | 0.9800     |
| C(2)-H(2C)  | 0.9800     |
| O(3)-C(3)   | 1.4606(19) |
| C(3)-C(4)   | 1.500(3)   |
| C(3)-H(3A)  | 0.9900     |
| C(3)-H(3B)  | 0.9900     |
| C(4)-H(4A)  | 0.9800     |
| C(4)-H(4B)  | 0.9800     |
| C(4)-H(4C)  | 0.9800     |
| C(5)-C(11)  | 1.525(2)   |
| C(5)-C(6)   | 1.556(2)   |
| C(5)-C(9)   | 1.583(2)   |
| C(11)-C(12) | 1.399(2)   |
| C(11)-C(16) | 1.400(2)   |
| C(12)-C(13) | 1.383(2)   |
| C(12)-H(12) | 0.9500     |
| C(13)-C(14) | 1.386(3)   |
| C(13)-H(13) | 0.9500     |
| C(14)-C(15) | 1.384(3)   |
| C(14)-Cl(1) | 1.7467(17) |
| C(15)-C(16) | 1.388(2)   |
| C(15)-H(15) | 0.9500     |
| C(16)-H(16) | 0.9500     |
| C(6)-C(7)   | 1.508(2)   |
| C(6)-H(6A)  | 0.9900     |



|               |            |
|---------------|------------|
| C(6)-H(6B)    | 0.9900     |
| C(7)-C(8)     | 1.331(2)   |
| C(7)-C(17)    | 1.482(2)   |
| C(17)-O(4)    | 1.212(2)   |
| C(17)-O(5)    | 1.332(2)   |
| O(5)-H(5)     | 0.8400     |
| C(8)-C(9)     | 1.505(2)   |
| C(8)-H(8)     | 0.9500     |
| C(9)-C(10)    | 1.537(2)   |
| C(9)-H(9)     | 1.0000     |
| C(10)-H(10A)  | 0.9800     |
| C(10)-H(10B)  | 0.9800     |
| C(10)-H(10C)  | 0.9800     |
| P(2)-O(101)   | 1.4805(13) |
| P(2)-O(102)   | 1.5708(11) |
| P(2)-O(103)   | 1.5729(12) |
| P(2)-C(105)   | 1.8291(16) |
| O(102)-C(101) | 1.467(2)   |
| C(101)-C(102) | 1.502(2)   |
| C(101)-H(10D) | 0.9900     |
| C(101)-H(10E) | 0.9900     |
| C(102)-H(10F) | 0.9800     |
| C(102)-H(10G) | 0.9800     |
| C(102)-H(10H) | 0.9800     |
| O(103)-C(103) | 1.4568(19) |
| C(103)-C(104) | 1.500(3)   |
| C(103)-H(10I) | 0.9900     |
| C(103)-H(10J) | 0.9900     |
| C(104)-H(10K) | 0.9800     |
| C(104)-H(10L) | 0.9800     |
| C(104)-H(10M) | 0.9800     |
| C(105)-C(111) | 1.522(2)   |
| C(105)-C(106) | 1.559(2)   |
| C(105)-C(109) | 1.584(2)   |
| C(111)-C(116) | 1.395(2)   |
| C(111)-C(112) | 1.404(2)   |

|                 |            |
|-----------------|------------|
| C(112)-C(113)   | 1.383(2)   |
| C(112)-H(112)   | 0.9500     |
| C(113)-C(114)   | 1.387(2)   |
| C(113)-H(113)   | 0.9500     |
| C(114)-C(115)   | 1.385(2)   |
| C(114)-Cl(2)    | 1.7435(17) |
| C(115)-C(116)   | 1.389(2)   |
| C(115)-H(115)   | 0.9500     |
| C(116)-H(116)   | 0.9500     |
| C(106)-C(107)   | 1.499(2)   |
| C(106)-H(10N)   | 0.9900     |
| C(106)-H(10O)   | 0.9900     |
| C(107)-C(108)   | 1.334(2)   |
| C(107)-C(117)   | 1.476(2)   |
| C(117)-O(104)   | 1.211(2)   |
| C(117)-O(105)   | 1.334(2)   |
| O(105)-H(105)   | 0.8400     |
| C(108)-C(109)   | 1.506(2)   |
| C(108)-H(108)   | 0.9500     |
| C(109)-C(110)   | 1.541(2)   |
| C(109)-H(109)   | 1.0000     |
| C(110)-H(11A)   | 0.9800     |
| C(110)-H(11B)   | 0.9800     |
| C(110)-H(11C)   | 0.9800     |
| O(1)-P(1)-O(2)  | 116.06(7)  |
| O(1)-P(1)-O(3)  | 111.62(6)  |
| O(2)-P(1)-O(3)  | 104.07(6)  |
| O(1)-P(1)-C(5)  | 114.15(7)  |
| O(2)-P(1)-C(5)  | 101.87(6)  |
| O(3)-P(1)-C(5)  | 108.10(7)  |
| C(1)-O(2)-P(1)  | 119.97(10) |
| O(2)-C(1)-C(2)  | 108.71(14) |
| O(2)-C(1)-H(1A) | 109.9      |
| C(2)-C(1)-H(1A) | 109.9      |
| O(2)-C(1)-H(1B) | 109.9      |

|                   |            |
|-------------------|------------|
| C(2)-C(1)-H(1B)   | 109.9      |
| H(1A)-C(1)-H(1B)  | 108.3      |
| C(1)-C(2)-H(2A)   | 109.5      |
| C(1)-C(2)-H(2B)   | 109.5      |
| H(2A)-C(2)-H(2B)  | 109.5      |
| C(1)-C(2)-H(2C)   | 109.5      |
| H(2A)-C(2)-H(2C)  | 109.5      |
| H(2B)-C(2)-H(2C)  | 109.5      |
| C(3)-O(3)-P(1)    | 121.06(10) |
| O(3)-C(3)-C(4)    | 107.57(14) |
| O(3)-C(3)-H(3A)   | 110.2      |
| C(4)-C(3)-H(3A)   | 110.2      |
| O(3)-C(3)-H(3B)   | 110.2      |
| C(4)-C(3)-H(3B)   | 110.2      |
| H(3A)-C(3)-H(3B)  | 108.5      |
| C(3)-C(4)-H(4A)   | 109.5      |
| C(3)-C(4)-H(4B)   | 109.5      |
| H(4A)-C(4)-H(4B)  | 109.5      |
| C(3)-C(4)-H(4C)   | 109.5      |
| H(4A)-C(4)-H(4C)  | 109.5      |
| H(4B)-C(4)-H(4C)  | 109.5      |
| C(11)-C(5)-C(6)   | 115.46(12) |
| C(11)-C(5)-C(9)   | 114.94(13) |
| C(6)-C(5)-C(9)    | 103.93(13) |
| C(11)-C(5)-P(1)   | 105.11(11) |
| C(6)-C(5)-P(1)    | 109.41(10) |
| C(9)-C(5)-P(1)    | 107.78(10) |
| C(12)-C(11)-C(16) | 117.85(15) |
| C(12)-C(11)-C(5)  | 119.83(14) |
| C(16)-C(11)-C(5)  | 122.23(15) |
| C(13)-C(12)-C(11) | 121.59(16) |
| C(13)-C(12)-H(12) | 119.2      |
| C(11)-C(12)-H(12) | 119.2      |
| C(12)-C(13)-C(14) | 118.80(17) |
| C(12)-C(13)-H(13) | 120.6      |
| C(14)-C(13)-H(13) | 120.6      |

|                     |            |
|---------------------|------------|
| C(15)-C(14)-C(13)   | 121.55(16) |
| C(15)-C(14)-Cl(1)   | 119.38(13) |
| C(13)-C(14)-Cl(1)   | 119.07(14) |
| C(14)-C(15)-C(16)   | 118.79(15) |
| C(14)-C(15)-H(15)   | 120.6      |
| C(16)-C(15)-H(15)   | 120.6      |
| C(15)-C(16)-C(11)   | 121.40(16) |
| C(15)-C(16)-H(16)   | 119.3      |
| C(11)-C(16)-H(16)   | 119.3      |
| C(7)-C(6)-C(5)      | 103.41(12) |
| C(7)-C(6)-H(6A)     | 111.1      |
| C(5)-C(6)-H(6A)     | 111.1      |
| C(7)-C(6)-H(6B)     | 111.1      |
| C(5)-C(6)-H(6B)     | 111.1      |
| H(6A)-C(6)-H(6B)    | 109.0      |
| C(8)-C(7)-C(17)     | 127.00(15) |
| C(8)-C(7)-C(6)      | 112.14(15) |
| C(17)-C(7)-C(6)     | 120.73(14) |
| O(4)-C(17)-O(5)     | 124.18(16) |
| O(4)-C(17)-C(7)     | 122.87(15) |
| O(5)-C(17)-C(7)     | 112.95(13) |
| C(17)-O(5)-H(5)     | 109.5      |
| C(7)-C(8)-C(9)      | 112.35(14) |
| C(7)-C(8)-H(8)      | 123.8      |
| C(9)-C(8)-H(8)      | 123.8      |
| C(8)-C(9)-C(10)     | 107.76(14) |
| C(8)-C(9)-C(5)      | 102.39(12) |
| C(10)-C(9)-C(5)     | 114.84(12) |
| C(8)-C(9)-H(9)      | 110.5      |
| C(10)-C(9)-H(9)     | 110.5      |
| C(5)-C(9)-H(9)      | 110.5      |
| C(9)-C(10)-H(10A)   | 109.5      |
| C(9)-C(10)-H(10B)   | 109.5      |
| H(10A)-C(10)-H(10B) | 109.5      |
| C(9)-C(10)-H(10C)   | 109.5      |
| H(10A)-C(10)-H(10C) | 109.5      |

|                      |            |
|----------------------|------------|
| H(10B)-C(10)-H(10C)  | 109.5      |
| O(101)-P(2)-O(102)   | 114.00(7)  |
| O(101)-P(2)-O(103)   | 113.01(7)  |
| O(102)-P(2)-O(103)   | 105.44(6)  |
| O(101)-P(2)-C(105)   | 114.93(7)  |
| O(102)-P(2)-C(105)   | 105.70(7)  |
| O(103)-P(2)-C(105)   | 102.65(7)  |
| C(101)-O(102)-P(2)   | 124.44(11) |
| O(102)-C(101)-C(102) | 110.50(14) |
| O(102)-C(101)-H(10D) | 109.5      |
| C(102)-C(101)-H(10D) | 109.5      |
| O(102)-C(101)-H(10E) | 109.5      |
| C(102)-C(101)-H(10E) | 109.5      |
| H(10D)-C(101)-H(10E) | 108.1      |
| C(101)-C(102)-H(10F) | 109.5      |
| C(101)-C(102)-H(10G) | 109.5      |
| H(10F)-C(102)-H(10G) | 109.5      |
| C(101)-C(102)-H(10H) | 109.5      |
| H(10F)-C(102)-H(10H) | 109.5      |
| H(10G)-C(102)-H(10H) | 109.5      |
| C(103)-O(103)-P(2)   | 118.98(11) |
| O(103)-C(103)-C(104) | 108.09(14) |
| O(103)-C(103)-H(10I) | 110.1      |
| C(104)-C(103)-H(10I) | 110.1      |
| O(103)-C(103)-H(10J) | 110.1      |
| C(104)-C(103)-H(10J) | 110.1      |
| H(10I)-C(103)-H(10J) | 108.4      |
| C(103)-C(104)-H(10K) | 109.5      |
| C(103)-C(104)-H(10L) | 109.5      |
| H(10K)-C(104)-H(10L) | 109.5      |
| C(103)-C(104)-H(10M) | 109.5      |
| H(10K)-C(104)-H(10M) | 109.5      |
| H(10L)-C(104)-H(10M) | 109.5      |
| C(111)-C(105)-C(106) | 114.05(12) |
| C(111)-C(105)-C(109) | 115.66(12) |
| C(106)-C(105)-C(109) | 104.18(13) |

|                      |            |
|----------------------|------------|
| C(111)-C(105)-P(2)   | 105.47(11) |
| C(106)-C(105)-P(2)   | 109.48(10) |
| C(109)-C(105)-P(2)   | 107.83(10) |
| C(116)-C(111)-C(112) | 117.84(15) |
| C(116)-C(111)-C(105) | 121.83(15) |
| C(112)-C(111)-C(105) | 120.25(14) |
| C(113)-C(112)-C(111) | 121.24(15) |
| C(113)-C(112)-H(112) | 119.4      |
| C(111)-C(112)-H(112) | 119.4      |
| C(112)-C(113)-C(114) | 119.15(16) |
| C(112)-C(113)-H(113) | 120.4      |
| C(114)-C(113)-H(113) | 120.4      |
| C(115)-C(114)-C(113) | 121.30(15) |
| C(115)-C(114)-Cl(2)  | 119.26(13) |
| C(113)-C(114)-Cl(2)  | 119.44(14) |
| C(114)-C(115)-C(116) | 118.72(15) |
| C(114)-C(115)-H(115) | 120.6      |
| C(116)-C(115)-H(115) | 120.6      |
| C(115)-C(116)-C(111) | 121.66(16) |
| C(115)-C(116)-H(116) | 119.2      |
| C(111)-C(116)-H(116) | 119.2      |
| C(107)-C(106)-C(105) | 103.52(12) |
| C(107)-C(106)-H(10N) | 111.1      |
| C(105)-C(106)-H(10N) | 111.1      |
| C(107)-C(106)-H(10O) | 111.1      |
| C(105)-C(106)-H(10O) | 111.1      |
| H(10N)-C(106)-H(10O) | 109.0      |
| C(108)-C(107)-C(117) | 127.89(16) |
| C(108)-C(107)-C(106) | 112.55(16) |
| C(117)-C(107)-C(106) | 119.53(14) |
| O(104)-C(117)-O(105) | 123.70(16) |
| O(104)-C(117)-C(107) | 122.13(15) |
| O(105)-C(117)-C(107) | 114.17(14) |
| C(117)-O(105)-H(105) | 109.5      |
| C(107)-C(108)-C(109) | 112.29(15) |
| C(107)-C(108)-H(108) | 123.9      |

|                      |            |
|----------------------|------------|
| C(109)-C(108)-H(108) | 123.9      |
| C(108)-C(109)-C(110) | 108.20(14) |
| C(108)-C(109)-C(105) | 102.40(13) |
| C(110)-C(109)-C(105) | 114.73(13) |
| C(108)-C(109)-H(109) | 110.4      |
| C(110)-C(109)-H(109) | 110.4      |
| C(105)-C(109)-H(109) | 110.4      |
| C(109)-C(110)-H(11A) | 109.5      |
| C(109)-C(110)-H(11B) | 109.5      |
| H(11A)-C(110)-H(11B) | 109.5      |
| C(109)-C(110)-H(11C) | 109.5      |
| H(11A)-C(110)-H(11C) | 109.5      |
| H(11B)-C(110)-H(11C) | 109.5      |

---

Symmetry transformations used to generate equivalent atoms:

Table 4. Anisotropic displacement parameters ( $\text{\AA}^2 \times 10^3$ ) for D11020. The anisotropic displacement factor exponent takes the form:  $-2p^2[ h^2 a^{*2}U^{11} + \dots + 2 h k a^* b^* U^{12} ]$

|        | U <sup>11</sup> | U <sup>22</sup> | U <sup>33</sup> | U <sup>23</sup> | U <sup>13</sup> | U <sup>12</sup> |
|--------|-----------------|-----------------|-----------------|-----------------|-----------------|-----------------|
| P(1)   | 15(1)           | 12(1)           | 18(1)           | 1(1)            | 4(1)            | 0(1)            |
| O(1)   | 18(1)           | 16(1)           | 25(1)           | 2(1)            | 4(1)            | 0(1)            |
| O(2)   | 19(1)           | 18(1)           | 21(1)           | -4(1)           | 6(1)            | -2(1)           |
| C(1)   | 25(1)           | 22(1)           | 22(1)           | -7(1)           | 6(1)            | -4(1)           |
| C(2)   | 30(1)           | 41(1)           | 44(1)           | -23(1)          | 4(1)            | 8(1)            |
| O(3)   | 17(1)           | 19(1)           | 20(1)           | 4(1)            | 3(1)            | 0(1)            |
| C(3)   | 17(1)           | 27(1)           | 32(1)           | 6(1)            | 1(1)            | 0(1)            |
| C(4)   | 23(1)           | 29(1)           | 31(1)           | 5(1)            | 5(1)            | 7(1)            |
| C(5)   | 15(1)           | 16(1)           | 18(1)           | -1(1)           | 4(1)            | -1(1)           |
| C(11)  | 20(1)           | 16(1)           | 16(1)           | -1(1)           | 5(1)            | 2(1)            |
| C(12)  | 21(1)           | 21(1)           | 21(1)           | 2(1)            | 6(1)            | 2(1)            |
| C(13)  | 30(1)           | 20(1)           | 21(1)           | 4(1)            | 8(1)            | 4(1)            |
| C(14)  | 27(1)           | 25(1)           | 18(1)           | 4(1)            | 5(1)            | 11(1)           |
| Cl(1)  | 30(1)           | 31(1)           | 28(1)           | 11(1)           | 9(1)            | 17(1)           |
| C(15)  | 20(1)           | 29(1)           | 19(1)           | 1(1)            | 6(1)            | 5(1)            |
| C(16)  | 21(1)           | 20(1)           | 17(1)           | 1(1)            | 5(1)            | 2(1)            |
| C(6)   | 16(1)           | 13(1)           | 21(1)           | 1(1)            | 4(1)            | 1(1)            |
| C(7)   | 17(1)           | 15(1)           | 18(1)           | -2(1)           | 2(1)            | 2(1)            |
| C(17)  | 19(1)           | 16(1)           | 21(1)           | 0(1)            | 4(1)            | 0(1)            |
| O(4)   | 28(1)           | 18(1)           | 44(1)           | 8(1)            | 17(1)           | 2(1)            |
| O(5)   | 24(1)           | 13(1)           | 39(1)           | 6(1)            | 12(1)           | 3(1)            |
| C(8)   | 18(1)           | 16(1)           | 20(1)           | -1(1)           | 3(1)            | 3(1)            |
| C(9)   | 16(1)           | 16(1)           | 19(1)           | 0(1)            | 6(1)            | 1(1)            |
| C(10)  | 27(1)           | 25(1)           | 19(1)           | 2(1)            | 7(1)            | 6(1)            |
| P(2)   | 14(1)           | 12(1)           | 18(1)           | 0(1)            | 3(1)            | 0(1)            |
| O(101) | 18(1)           | 16(1)           | 25(1)           | 0(1)            | 3(1)            | -1(1)           |
| O(102) | 23(1)           | 17(1)           | 24(1)           | -2(1)           | 10(1)           | 0(1)            |
| C(101) | 26(1)           | 21(1)           | 24(1)           | -5(1)           | 8(1)            | 3(1)            |
| C(102) | 25(1)           | 20(1)           | 25(1)           | 0(1)            | 8(1)            | 1(1)            |
| O(103) | 20(1)           | 17(1)           | 20(1)           | -1(1)           | -1(1)           | 2(1)            |
| C(103) | 25(1)           | 23(1)           | 20(1)           | -1(1)           | -3(1)           | 2(1)            |



|        |       |       |       |       |       |       |
|--------|-------|-------|-------|-------|-------|-------|
| C(104) | 25(1) | 45(1) | 34(1) | -1(1) | -3(1) | 10(1) |
| C(105) | 14(1) | 16(1) | 18(1) | 0(1)  | 3(1)  | -2(1) |
| C(111) | 17(1) | 15(1) | 16(1) | -1(1) | 2(1)  | 0(1)  |
| C(112) | 18(1) | 19(1) | 19(1) | 0(1)  | 4(1)  | -1(1) |
| C(113) | 24(1) | 17(1) | 19(1) | 1(1)  | 3(1)  | -1(1) |
| C(114) | 22(1) | 18(1) | 19(1) | 0(1)  | -1(1) | 4(1)  |
| Cl(2)  | 23(1) | 20(1) | 35(1) | 4(1)  | -3(1) | 5(1)  |
| C(115) | 16(1) | 20(1) | 21(1) | -3(1) | 0(1)  | -1(1) |
| C(116) | 19(1) | 17(1) | 19(1) | -1(1) | 4(1)  | -3(1) |
| C(106) | 17(1) | 13(1) | 21(1) | 0(1)  | 4(1)  | -1(1) |
| C(107) | 19(1) | 15(1) | 19(1) | -2(1) | 2(1)  | 0(1)  |
| C(117) | 19(1) | 14(1) | 20(1) | -2(1) | 2(1)  | 2(1)  |
| O(104) | 27(1) | 17(1) | 33(1) | 3(1)  | 14(1) | 1(1)  |
| O(105) | 23(1) | 14(1) | 41(1) | 4(1)  | 12(1) | 3(1)  |
| C(108) | 18(1) | 18(1) | 22(1) | -3(1) | 5(1)  | 1(1)  |
| C(109) | 17(1) | 17(1) | 21(1) | 0(1)  | 6(1)  | -1(1) |
| C(110) | 31(1) | 28(1) | 21(1) | -1(1) | 10(1) | 4(1)  |

---

Table 5. Hydrogen coordinates ( $\times 10^4$ ) and isotropic displacement parameters ( $\text{\AA}^2 \times 10^{-3}$ ) for D11020.

|        | x     | y    | z     | U(eq) |
|--------|-------|------|-------|-------|
| H(1A)  | 2065  | 2235 | 7173  | 27    |
| H(1B)  | 2064  | 958  | 7875  | 27    |
| H(2A)  | 3855  | 2249 | 7410  | 58    |
| H(2B)  | 3457  | 628  | 7160  | 58    |
| H(2C)  | 3877  | 1033 | 8146  | 58    |
| H(3A)  | -403  | 4194 | 8869  | 30    |
| H(3B)  | -546  | 3482 | 7922  | 30    |
| H(4A)  | -320  | 6538 | 8259  | 42    |
| H(4B)  | -1383 | 5765 | 7865  | 42    |
| H(4C)  | -463  | 5829 | 7315  | 42    |
| H(12)  | 1913  | 1648 | 10685 | 25    |
| H(13)  | 3057  | -98  | 11358 | 28    |
| H(15)  | 5452  | 2327 | 10817 | 27    |
| H(16)  | 4296  | 4053 | 10125 | 23    |
| H(6A)  | 3300  | 5859 | 10017 | 20    |
| H(6B)  | 2838  | 5542 | 9019  | 20    |
| H(5)   | 1209  | 9898 | 9304  | 37    |
| H(8)   | 485   | 6668 | 10127 | 22    |
| H(9)   | 716   | 3982 | 10251 | 20    |
| H(10A) | 2305  | 5299 | 11502 | 35    |
| H(10B) | 1791  | 3742 | 11615 | 35    |
| H(10C) | 1128  | 5204 | 11634 | 35    |
| H(10D) | 8039  | 1039 | 2637  | 28    |
| H(10E) | 7371  | 97   | 3205  | 28    |
| H(10F) | 9406  | 1078 | 3833  | 34    |
| H(10G) | 9138  | -549 | 3496  | 34    |
| H(10H) | 8743  | 30   | 4346  | 34    |
| H(10I) | 5046  | 1981 | 2975  | 28    |
| H(10J) | 5574  | 3205 | 2460  | 28    |
| H(10K) | 3924  | 3736 | 3389  | 53    |

|        |       |      |      |    |
|--------|-------|------|------|----|
| H(10L) | 3819  | 3730 | 2359 | 53 |
| H(10M) | 4468  | 4986 | 2911 | 53 |
| H(112) | 7126  | 674  | 5991 | 22 |
| H(113) | 8354  | -970 | 6657 | 24 |
| H(115) | 10625 | 1624 | 6040 | 24 |
| H(116) | 9386  | 3242 | 5350 | 22 |
| H(10N) | 8384  | 4967 | 5335 | 20 |
| H(10O) | 7899  | 4701 | 4337 | 20 |
| H(105) | 6253  | 8967 | 4651 | 38 |
| H(108) | 5568  | 5671 | 5503 | 23 |
| H(109) | 5821  | 2980 | 5542 | 21 |
| H(11A) | 7395  | 4215 | 6841 | 39 |
| H(11B) | 6888  | 2637 | 6901 | 39 |
| H(11C) | 6217  | 4079 | 6965 | 39 |

---

Table 6. Hydrogen bonds for D11020 [ $\text{\AA}$  and  $^\circ$ ].

| D-H...A                  | d(D-H) | d(H...A) | d(D...A)   | $\angle$ (DHA) |
|--------------------------|--------|----------|------------|----------------|
| O(5)-H(5)...O(1)#1       | 0.84   | 1.83     | 2.6408(18) | 160.9          |
| O(105)-H(105)...O(101)#1 | 0.84   | 1.78     | 2.6158(17) | 170.6          |

Symmetry transformations used to generate equivalent atoms:

#1  $x, y+1, z$

Absolute configuration of the products from cycloaddition of the oxygen-substituted olefin: Dicyclohexylamine salt of the hydrolysis product (carboxylic acid) of Table 5, entry 3, derived from catalyst (*R*)-1.

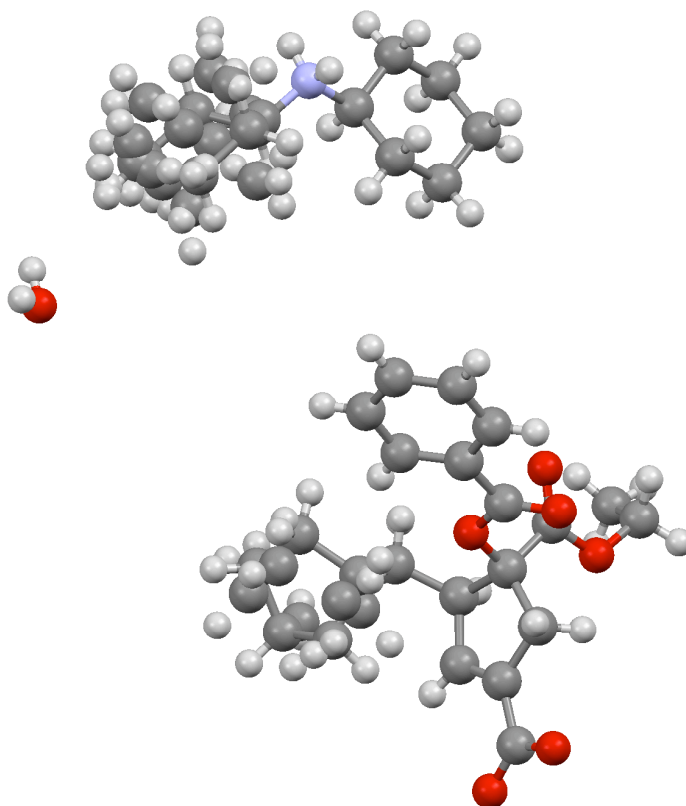

The Flack test for this structure is inconclusive. However the method by Spek and Hooft, which is based on Bayesian statistics, results in the following probabilities: The probability P2 of the model to be correct assuming that the sample is KNOWN to be enantiomerically pure is 1.0. The probability P3 of the model to be correct assuming that the structure is either right or wrong or a 50:50 racemic twin is 1.0. The probability of the model to be a 50:50 racemic twin is 0.8E-18. The inverted model gives rise to opposite results in the Bayesian statistics, further improving the confidence in the absolute configuration as determined by X-ray diffraction.

Table 1. Crystal data and structure refinement for D11026.

|                     |                                                  |
|---------------------|--------------------------------------------------|
| Identification code | d11026                                           |
| Empirical formula   | C <sub>34</sub> H <sub>51</sub> N O <sub>7</sub> |
| Formula weight      | 585.76                                           |
| Temperature         | 100(2) K                                         |

|                                   |                                             |                 |
|-----------------------------------|---------------------------------------------|-----------------|
| Wavelength                        | 1.54178 Å                                   |                 |
| Crystal system                    | Monoclinic                                  |                 |
| Space group                       | P2(1)                                       |                 |
| Unit cell dimensions              | a = 9.5202(3) Å                             | a = 90°.        |
|                                   | b = 10.1753(3) Å                            | b = 94.524(2)°. |
|                                   | c = 16.8674(5) Å                            | g = 90°.        |
| Volume                            | 1628.87(9) Å <sup>3</sup>                   |                 |
| Z                                 | 2                                           |                 |
| Density (calculated)              | 1.194 Mg/m <sup>3</sup>                     |                 |
| Absorption coefficient            | 0.662 mm <sup>-1</sup>                      |                 |
| F(000)                            | 636                                         |                 |
| Crystal size                      | 0.45 x 0.15 x 0.07 mm <sup>3</sup>          |                 |
| Theta range for data collection   | 2.63 to 69.22°.                             |                 |
| Index ranges                      | -11<=h<=9, -12<=k<=12, -20<=l<=20           |                 |
| Reflections collected             | 32466                                       |                 |
| Independent reflections           | 5887 [R(int) = 0.0428]                      |                 |
| Completeness to theta = 69.22°    | 99.4 %                                      |                 |
| Absorption correction             | Semi-empirical from equivalents             |                 |
| Max. and min. transmission        | 0.9551 and 0.7549                           |                 |
| Refinement method                 | Full-matrix least-squares on F <sup>2</sup> |                 |
| Data / restraints / parameters    | 5887 / 714 / 549                            |                 |
| Goodness-of-fit on F <sup>2</sup> | 1.029                                       |                 |
| Final R indices [I>2sigma(I)]     | R1 = 0.0511, wR2 = 0.1396                   |                 |
| R indices (all data)              | R1 = 0.0555, wR2 = 0.1448                   |                 |
| Absolute structure parameter      | -0.1(2)                                     |                 |
| Largest diff. peak and hole       | 0.239 and -0.186 e.Å <sup>-3</sup>          |                 |

Table 2. Atomic coordinates ( $\times 10^4$ ) and equivalent isotropic displacement parameters ( $\text{\AA}^2 \times 10^3$ ) for D11026.  $U(\text{eq})$  is defined as one-third of the trace of the orthogonalized  $U^{ij}$  tensor.

|        | x        | y        | z       | $U(\text{eq})$ |
|--------|----------|----------|---------|----------------|
| C(1)   | 3930(3)  | 734(3)   | 2570(2) | 47(1)          |
| C(6)   | 5454(3)  | 1181(3)  | 2680(2) | 48(1)          |
| O(1)   | 6232(2)  | 951(2)   | 3260(1) | 61(1)          |
| O(2)   | 5785(2)  | 1912(2)  | 2072(1) | 59(1)          |
| C(7)   | 7175(4)  | 2508(4)  | 2129(2) | 75(1)          |
| C(8)   | 7191(5)  | 3740(4)  | 2616(3) | 90(1)          |
| O(3)   | 3754(2)  | -335(2)  | 3116(1) | 47(1)          |
| O(4)   | 5259(2)  | -1581(2) | 2469(1) | 62(1)          |
| C(10)  | 4555(3)  | -1418(3) | 3024(2) | 49(1)          |
| C(11)  | 4442(3)  | -2375(3) | 3677(2) | 47(1)          |
| C(12)  | 3611(3)  | -2158(2) | 4307(2) | 49(1)          |
| C(13)  | 3589(3)  | -3062(3) | 4914(2) | 55(1)          |
| C(14)  | 4385(3)  | -4201(3) | 4898(2) | 60(1)          |
| C(15)  | 5190(3)  | -4430(3) | 4266(2) | 62(1)          |
| C(16)  | 5227(3)  | -3527(3) | 3658(2) | 55(1)          |
| C(2)   | 2936(3)  | 1887(3)  | 2819(2) | 47(1)          |
| C(17)  | 2432(3)  | 1776(3)  | 3652(2) | 58(1)          |
| C(18)  | 1929(7)  | 3055(5)  | 3975(3) | 52(1)          |
| C(19)  | 1644(7)  | 2959(5)  | 4858(3) | 58(1)          |
| C(20)  | 645(8)   | 4074(8)  | 5007(4) | 67(2)          |
| C(21)  | 71(11)   | 4541(9)  | 4206(4) | 91(3)          |
| C(22)  | 532(6)   | 3527(6)  | 3610(3) | 63(2)          |
| C(18A) | 1182(10) | 2796(8)  | 3852(5) | 53(2)          |
| C(19A) | 752(15)  | 2744(11) | 4708(6) | 85(3)          |
| C(20A) | 90(17)   | 4074(13) | 4825(7) | 82(3)          |
| C(21A) | 594(13)  | 4979(10) | 4209(8) | 68(3)          |
| C(22A) | 1615(10) | 4176(8)  | 3750(5) | 66(2)          |
| C(3)   | 1812(3)  | 1909(3)  | 2142(2) | 48(1)          |
| C(4)   | 2056(3)  | 1113(2)  | 1551(2) | 45(1)          |
| C(23)  | 1178(3)  | 931(2)   | 782(2)  | 47(1)          |
| O(5)   | 1537(2)  | 9(2)     | 352(1)  | 52(1)          |

|        |          |          |          |       |
|--------|----------|----------|----------|-------|
| O(6)   | 140(2)   | 1676(2)  | 622(1)   | 65(1) |
| C(5)   | 3387(3)  | 365(3)   | 1712(2)  | 56(1) |
| N(1)   | 9018(2)  | 1361(3)  | 9071(1)  | 52(1) |
| C(31)  | 9492(3)  | 2414(3)  | 8539(2)  | 50(1) |
| C(32)  | 11045(3) | 2721(4)  | 8750(2)  | 64(1) |
| C(33)  | 11554(3) | 3784(4)  | 8215(2)  | 73(1) |
| C(34)  | 11295(3) | 3418(4)  | 7344(2)  | 65(1) |
| C(35)  | 9760(3)  | 3101(3)  | 7134(2)  | 66(1) |
| C(36)  | 9242(3)  | 2029(3)  | 7674(2)  | 56(1) |
| C(41)  | 7408(7)  | 1284(8)  | 9054(5)  | 41(2) |
| C(42)  | 6809(5)  | 1889(5)  | 9771(3)  | 39(1) |
| C(43)  | 5212(6)  | 1720(6)  | 9741(4)  | 50(1) |
| C(44)  | 4761(10) | 313(10)  | 9606(6)  | 61(2) |
| C(45)  | 5400(7)  | -269(8)  | 8898(5)  | 74(2) |
| C(46)  | 6985(6)  | -134(6)  | 8944(4)  | 60(2) |
| C(41A) | 7516(10) | 764(10)  | 9036(8)  | 50(2) |
| C(42A) | 6588(10) | 1846(11) | 9324(9)  | 64(2) |
| C(43A) | 5062(11) | 1379(13) | 9314(11) | 80(3) |
| C(44A) | 4986(17) | 104(15)  | 9808(11) | 81(3) |
| C(45A) | 5830(12) | -915(11) | 9426(7)  | 78(2) |
| C(46A) | 7386(11) | -484(10) | 9503(7)  | 66(2) |
| C(41B) | 7542(12) | 1500(16) | 9256(8)  | 46(3) |
| C(42B) | 7449(11) | 382(13)  | 9846(7)  | 53(2) |
| C(43B) | 5952(12) | 417(16)  | 10107(7) | 62(3) |
| C(44B) | 4872(19) | 300(20)  | 9417(10) | 62(3) |
| C(45B) | 5056(11) | 1380(14) | 8824(8)  | 53(3) |
| C(46B) | 6539(10) | 1353(12) | 8524(6)  | 47(2) |
| O(1W)  | 610(2)   | -887(2)  | 8894(1)  | 55(1) |

---



Table 3. Bond lengths [ $\text{\AA}$ ] and angles [ $^\circ$ ] for D11026.

---

|              |          |
|--------------|----------|
| C(1)-O(3)    | 1.444(3) |
| C(1)-C(6)    | 1.518(4) |
| C(1)-C(5)    | 1.543(4) |
| C(1)-C(2)    | 1.585(4) |
| C(6)-O(1)    | 1.202(3) |
| C(6)-O(2)    | 1.326(3) |
| O(2)-C(7)    | 1.451(4) |
| C(7)-C(8)    | 1.498(5) |
| C(7)-H(7A)   | 0.9900   |
| C(7)-H(7B)   | 0.9900   |
| C(8)-H(8A)   | 0.9800   |
| C(8)-H(8B)   | 0.9800   |
| C(8)-H(8C)   | 0.9800   |
| O(3)-C(10)   | 1.356(3) |
| O(4)-C(10)   | 1.205(3) |
| C(10)-C(11)  | 1.480(4) |
| C(11)-C(16)  | 1.391(4) |
| C(11)-C(12)  | 1.392(4) |
| C(12)-C(13)  | 1.378(4) |
| C(12)-H(12)  | 0.9500   |
| C(13)-C(14)  | 1.386(4) |
| C(13)-H(13)  | 0.9500   |
| C(14)-C(15)  | 1.381(5) |
| C(14)-H(14)  | 0.9500   |
| C(15)-C(16)  | 1.379(4) |
| C(15)-H(15)  | 0.9500   |
| C(16)-H(16)  | 0.9500   |
| C(2)-C(3)    | 1.502(4) |
| C(2)-C(17)   | 1.525(4) |
| C(2)-H(2)    | 1.0000   |
| C(17)-C(18)  | 1.503(6) |
| C(17)-C(18A) | 1.634(8) |
| C(17)-H(17A) | 0.9900   |
| C(17)-H(17B) | 0.9900   |

|               |           |
|---------------|-----------|
| C(17)-H(17C)  | 0.9900    |
| C(17)-H(17D)  | 0.9900    |
| C(18)-C(22)   | 1.500(7)  |
| C(18)-C(19)   | 1.539(6)  |
| C(18)-H(18)   | 1.0000    |
| C(19)-C(20)   | 1.514(8)  |
| C(19)-H(19A)  | 0.9900    |
| C(19)-H(19B)  | 0.9900    |
| C(20)-C(21)   | 1.494(9)  |
| C(20)-H(20A)  | 0.9900    |
| C(20)-H(20B)  | 0.9900    |
| C(21)-C(22)   | 1.530(8)  |
| C(21)-H(21A)  | 0.9900    |
| C(21)-H(21B)  | 0.9900    |
| C(22)-H(22A)  | 0.9900    |
| C(22)-H(22B)  | 0.9900    |
| C(18A)-C(22A) | 1.477(11) |
| C(18A)-C(19A) | 1.533(11) |
| C(18A)-H(18A) | 1.0000    |
| C(19A)-C(20A) | 1.512(13) |
| C(19A)-H(19C) | 0.9900    |
| C(19A)-H(19D) | 0.9900    |
| C(20A)-C(21A) | 1.497(13) |
| C(20A)-H(20C) | 0.9900    |
| C(20A)-H(20D) | 0.9900    |
| C(21A)-C(22A) | 1.527(12) |
| C(21A)-H(21C) | 0.9900    |
| C(21A)-H(21D) | 0.9900    |
| C(22A)-H(22C) | 0.9900    |
| C(22A)-H(22D) | 0.9900    |
| C(3)-C(4)     | 1.319(4)  |
| C(3)-H(3)     | 0.9500    |
| C(4)-C(5)     | 1.485(4)  |
| C(4)-C(23)    | 1.498(3)  |
| C(23)-O(5)    | 1.250(3)  |
| C(23)-O(6)    | 1.258(3)  |

|              |           |
|--------------|-----------|
| C(5)-H(5A)   | 0.9900    |
| C(5)-H(5B)   | 0.9900    |
| N(1)-C(41B)  | 1.470(12) |
| N(1)-C(31)   | 1.491(4)  |
| N(1)-C(41)   | 1.532(7)  |
| N(1)-C(41A)  | 1.551(9)  |
| N(1)-H(1A)   | 0.858(19) |
| N(1)-H(1B)   | 0.888(18) |
| C(31)-C(36)  | 1.512(4)  |
| C(31)-C(32)  | 1.526(4)  |
| C(31)-H(31)  | 1.0000    |
| C(32)-C(33)  | 1.513(5)  |
| C(32)-H(32A) | 0.9900    |
| C(32)-H(32B) | 0.9900    |
| C(33)-C(34)  | 1.517(5)  |
| C(33)-H(33A) | 0.9900    |
| C(33)-H(33B) | 0.9900    |
| C(34)-C(35)  | 1.511(4)  |
| C(34)-H(34A) | 0.9900    |
| C(34)-H(34B) | 0.9900    |
| C(35)-C(36)  | 1.528(4)  |
| C(35)-H(35A) | 0.9900    |
| C(35)-H(35B) | 0.9900    |
| C(36)-H(36A) | 0.9900    |
| C(36)-H(36B) | 0.9900    |
| C(41)-C(46)  | 1.505(9)  |
| C(41)-C(42)  | 1.509(8)  |
| C(41)-H(41)  | 1.0000    |
| C(42)-C(43)  | 1.527(7)  |
| C(42)-H(42A) | 0.9900    |
| C(42)-H(42B) | 0.9900    |
| C(43)-C(44)  | 1.507(10) |
| C(43)-H(43A) | 0.9900    |
| C(43)-H(43B) | 0.9900    |
| C(44)-C(45)  | 1.504(10) |
| C(44)-H(44A) | 0.9900    |

|               |           |
|---------------|-----------|
| C(44)-H(44B)  | 0.9900    |
| C(45)-C(46)   | 1.512(8)  |
| C(45)-H(45A)  | 0.9900    |
| C(45)-H(45B)  | 0.9900    |
| C(46)-H(46A)  | 0.9900    |
| C(46)-H(46B)  | 0.9900    |
| C(41A)-C(46A) | 1.504(11) |
| C(41A)-C(42A) | 1.515(11) |
| C(41A)-H(41A) | 1.0000    |
| C(42A)-C(43A) | 1.527(11) |
| C(42A)-H(42C) | 0.9900    |
| C(42A)-H(42D) | 0.9900    |
| C(43A)-C(44A) | 1.546(13) |
| C(43A)-H(43C) | 0.9900    |
| C(43A)-H(43D) | 0.9900    |
| C(44A)-C(45A) | 1.489(13) |
| C(44A)-H(44C) | 0.9900    |
| C(44A)-H(44D) | 0.9900    |
| C(45A)-C(46A) | 1.540(11) |
| C(45A)-H(45C) | 0.9900    |
| C(45A)-H(45D) | 0.9900    |
| C(46A)-H(46C) | 0.9900    |
| C(46A)-H(46D) | 0.9900    |
| C(41B)-C(46B) | 1.508(12) |
| C(41B)-C(42B) | 1.519(13) |
| C(41B)-H(41B) | 1.0000    |
| C(42B)-C(43B) | 1.524(12) |
| C(42B)-H(42E) | 0.9900    |
| C(42B)-H(42F) | 0.9900    |
| C(43B)-C(44B) | 1.497(14) |
| C(43B)-H(43E) | 0.9900    |
| C(43B)-H(43F) | 0.9900    |
| C(44B)-C(45B) | 1.508(14) |
| C(44B)-H(44E) | 0.9900    |
| C(44B)-H(44F) | 0.9900    |
| C(45B)-C(46B) | 1.538(12) |

|               |           |
|---------------|-----------|
| C(45B)-H(45E) | 0.9900    |
| C(45B)-H(45F) | 0.9900    |
| C(46B)-H(46E) | 0.9900    |
| C(46B)-H(46F) | 0.9900    |
| O(1W)-H(1W1)  | 0.837(19) |
| O(1W)-H(1W2)  | 0.844(19) |

|                   |            |
|-------------------|------------|
| O(3)-C(1)-C(6)    | 107.8(2)   |
| O(3)-C(1)-C(5)    | 111.6(2)   |
| C(6)-C(1)-C(5)    | 115.7(2)   |
| O(3)-C(1)-C(2)    | 106.65(19) |
| C(6)-C(1)-C(2)    | 109.3(2)   |
| C(5)-C(1)-C(2)    | 105.4(2)   |
| O(1)-C(6)-O(2)    | 124.7(3)   |
| O(1)-C(6)-C(1)    | 124.3(2)   |
| O(2)-C(6)-C(1)    | 110.9(2)   |
| C(6)-O(2)-C(7)    | 117.0(3)   |
| O(2)-C(7)-C(8)    | 110.8(3)   |
| O(2)-C(7)-H(7A)   | 109.5      |
| C(8)-C(7)-H(7A)   | 109.5      |
| O(2)-C(7)-H(7B)   | 109.5      |
| C(8)-C(7)-H(7B)   | 109.5      |
| H(7A)-C(7)-H(7B)  | 108.1      |
| C(7)-C(8)-H(8A)   | 109.5      |
| C(7)-C(8)-H(8B)   | 109.5      |
| H(8A)-C(8)-H(8B)  | 109.5      |
| C(7)-C(8)-H(8C)   | 109.5      |
| H(8A)-C(8)-H(8C)  | 109.5      |
| H(8B)-C(8)-H(8C)  | 109.5      |
| C(10)-O(3)-C(1)   | 116.4(2)   |
| O(4)-C(10)-O(3)   | 123.6(2)   |
| O(4)-C(10)-C(11)  | 124.4(2)   |
| O(3)-C(10)-C(11)  | 112.0(2)   |
| C(16)-C(11)-C(12) | 119.3(3)   |
| C(16)-C(11)-C(10) | 117.8(2)   |
| C(12)-C(11)-C(10) | 122.9(2)   |

|                     |          |
|---------------------|----------|
| C(13)-C(12)-C(11)   | 120.3(2) |
| C(13)-C(12)-H(12)   | 119.9    |
| C(11)-C(12)-H(12)   | 119.9    |
| C(12)-C(13)-C(14)   | 120.2(3) |
| C(12)-C(13)-H(13)   | 119.9    |
| C(14)-C(13)-H(13)   | 119.9    |
| C(15)-C(14)-C(13)   | 119.6(3) |
| C(15)-C(14)-H(14)   | 120.2    |
| C(13)-C(14)-H(14)   | 120.2    |
| C(16)-C(15)-C(14)   | 120.6(3) |
| C(16)-C(15)-H(15)   | 119.7    |
| C(14)-C(15)-H(15)   | 119.7    |
| C(15)-C(16)-C(11)   | 119.9(3) |
| C(15)-C(16)-H(16)   | 120.0    |
| C(11)-C(16)-H(16)   | 120.0    |
| C(3)-C(2)-C(17)     | 116.4(2) |
| C(3)-C(2)-C(1)      | 102.4(2) |
| C(17)-C(2)-C(1)     | 115.3(2) |
| C(3)-C(2)-H(2)      | 107.4    |
| C(17)-C(2)-H(2)     | 107.4    |
| C(1)-C(2)-H(2)      | 107.4    |
| C(18)-C(17)-C(2)    | 113.7(3) |
| C(2)-C(17)-C(18A)   | 115.5(3) |
| C(18)-C(17)-H(17A)  | 108.8    |
| C(2)-C(17)-H(17A)   | 108.8    |
| C(18A)-C(17)-H(17A) | 82.5     |
| C(18)-C(17)-H(17B)  | 108.8    |
| C(2)-C(17)-H(17B)   | 108.8    |
| C(18A)-C(17)-H(17B) | 128.2    |
| H(17A)-C(17)-H(17B) | 107.7    |
| C(18)-C(17)-H(17C)  | 83.5     |
| C(2)-C(17)-H(17C)   | 108.4    |
| C(18A)-C(17)-H(17C) | 108.4    |
| H(17A)-C(17)-H(17C) | 131.0    |
| C(18)-C(17)-H(17D)  | 130.2    |
| C(2)-C(17)-H(17D)   | 108.4    |

|                      |          |
|----------------------|----------|
| C(18A)-C(17)-H(17D)  | 108.4    |
| H(17B)-C(17)-H(17D)  | 80.4     |
| H(17C)-C(17)-H(17D)  | 107.5    |
| C(22)-C(18)-C(17)    | 115.3(4) |
| C(22)-C(18)-C(19)    | 101.5(4) |
| C(17)-C(18)-C(19)    | 112.4(4) |
| C(22)-C(18)-H(18)    | 109.1    |
| C(17)-C(18)-H(18)    | 109.1    |
| C(19)-C(18)-H(18)    | 109.1    |
| C(20)-C(19)-C(18)    | 105.9(4) |
| C(20)-C(19)-H(19A)   | 110.6    |
| C(18)-C(19)-H(19A)   | 110.6    |
| C(20)-C(19)-H(19B)   | 110.6    |
| C(18)-C(19)-H(19B)   | 110.6    |
| H(19A)-C(19)-H(19B)  | 108.7    |
| C(21)-C(20)-C(19)    | 106.2(5) |
| C(21)-C(20)-H(20A)   | 110.5    |
| C(19)-C(20)-H(20A)   | 110.5    |
| C(21)-C(20)-H(20B)   | 110.5    |
| C(19)-C(20)-H(20B)   | 110.5    |
| H(20A)-C(20)-H(20B)  | 108.7    |
| C(20)-C(21)-C(22)    | 106.0(5) |
| C(20)-C(21)-H(21A)   | 110.5    |
| C(22)-C(21)-H(21A)   | 110.5    |
| C(20)-C(21)-H(21B)   | 110.5    |
| C(22)-C(21)-H(21B)   | 110.5    |
| H(21A)-C(21)-H(21B)  | 108.7    |
| C(18)-C(22)-C(21)    | 103.8(5) |
| C(18)-C(22)-H(22A)   | 111.0    |
| C(21)-C(22)-H(22A)   | 111.0    |
| C(18)-C(22)-H(22B)   | 111.0    |
| C(21)-C(22)-H(22B)   | 111.0    |
| H(22A)-C(22)-H(22B)  | 109.0    |
| C(22A)-C(18A)-C(19A) | 103.9(7) |
| C(22A)-C(18A)-C(17)  | 111.4(7) |
| C(19A)-C(18A)-C(17)  | 115.1(6) |

|                      |          |
|----------------------|----------|
| C(22A)-C(18A)-H(18A) | 108.7    |
| C(19A)-C(18A)-H(18A) | 108.7    |
| C(17)-C(18A)-H(18A)  | 108.7    |
| C(20A)-C(19A)-C(18A) | 103.7(7) |
| C(20A)-C(19A)-H(19C) | 111.0    |
| C(18A)-C(19A)-H(19C) | 111.0    |
| C(20A)-C(19A)-H(19D) | 111.0    |
| C(18A)-C(19A)-H(19D) | 111.0    |
| H(19C)-C(19A)-H(19D) | 109.0    |
| C(21A)-C(20A)-C(19A) | 107.5(9) |
| C(21A)-C(20A)-H(20C) | 110.2    |
| C(19A)-C(20A)-H(20C) | 110.2    |
| C(21A)-C(20A)-H(20D) | 110.2    |
| C(19A)-C(20A)-H(20D) | 110.2    |
| H(20C)-C(20A)-H(20D) | 108.5    |
| C(20A)-C(21A)-C(22A) | 106.0(8) |
| C(20A)-C(21A)-H(21C) | 110.5    |
| C(22A)-C(21A)-H(21C) | 110.5    |
| C(20A)-C(21A)-H(21D) | 110.5    |
| C(22A)-C(21A)-H(21D) | 110.5    |
| H(21C)-C(21A)-H(21D) | 108.7    |
| C(18A)-C(22A)-C(21A) | 104.8(7) |
| C(18A)-C(22A)-H(22C) | 110.8    |
| C(21A)-C(22A)-H(22C) | 110.8    |
| C(18A)-C(22A)-H(22D) | 110.8    |
| C(21A)-C(22A)-H(22D) | 110.8    |
| H(22C)-C(22A)-H(22D) | 108.9    |
| C(4)-C(3)-C(2)       | 114.0(2) |
| C(4)-C(3)-H(3)       | 123.0    |
| C(2)-C(3)-H(3)       | 123.0    |
| C(3)-C(4)-C(5)       | 112.0(2) |
| C(3)-C(4)-C(23)      | 127.6(2) |
| C(5)-C(4)-C(23)      | 120.3(2) |
| O(5)-C(23)-O(6)      | 125.0(2) |
| O(5)-C(23)-C(4)      | 115.8(2) |
| O(6)-C(23)-C(4)      | 119.1(2) |



|                     |          |
|---------------------|----------|
| C(4)-C(5)-C(1)      | 105.4(2) |
| C(4)-C(5)-H(5A)     | 110.7    |
| C(1)-C(5)-H(5A)     | 110.7    |
| C(4)-C(5)-H(5B)     | 110.7    |
| C(1)-C(5)-H(5B)     | 110.7    |
| H(5A)-C(5)-H(5B)    | 108.8    |
| C(41B)-N(1)-C(31)   | 113.5(6) |
| C(41B)-N(1)-C(41)   | 15.8(6)  |
| C(31)-N(1)-C(41)    | 112.0(4) |
| C(31)-N(1)-C(41A)   | 125.5(5) |
| C(41B)-N(1)-H(1A)   | 123(2)   |
| C(31)-N(1)-H(1A)    | 108(2)   |
| C(41)-N(1)-H(1A)    | 111(2)   |
| C(41A)-N(1)-H(1A)   | 92(2)    |
| C(41B)-N(1)-H(1B)   | 92(2)    |
| C(31)-N(1)-H(1B)    | 114(2)   |
| C(41)-N(1)-H(1B)    | 106(2)   |
| C(41A)-N(1)-H(1B)   | 109(2)   |
| H(1A)-N(1)-H(1B)    | 105(3)   |
| N(1)-C(31)-C(36)    | 111.3(2) |
| N(1)-C(31)-C(32)    | 109.9(2) |
| C(36)-C(31)-C(32)   | 110.8(2) |
| N(1)-C(31)-H(31)    | 108.3    |
| C(36)-C(31)-H(31)   | 108.3    |
| C(32)-C(31)-H(31)   | 108.3    |
| C(33)-C(32)-C(31)   | 111.0(3) |
| C(33)-C(32)-H(32A)  | 109.4    |
| C(31)-C(32)-H(32A)  | 109.4    |
| C(33)-C(32)-H(32B)  | 109.4    |
| C(31)-C(32)-H(32B)  | 109.4    |
| H(32A)-C(32)-H(32B) | 108.0    |
| C(32)-C(33)-C(34)   | 111.5(3) |
| C(32)-C(33)-H(33A)  | 109.3    |
| C(34)-C(33)-H(33A)  | 109.3    |
| C(32)-C(33)-H(33B)  | 109.3    |
| C(34)-C(33)-H(33B)  | 109.3    |

|                     |          |
|---------------------|----------|
| H(33A)-C(33)-H(33B) | 108.0    |
| C(35)-C(34)-C(33)   | 111.1(3) |
| C(35)-C(34)-H(34A)  | 109.4    |
| C(33)-C(34)-H(34A)  | 109.4    |
| C(35)-C(34)-H(34B)  | 109.4    |
| C(33)-C(34)-H(34B)  | 109.4    |
| H(34A)-C(34)-H(34B) | 108.0    |
| C(34)-C(35)-C(36)   | 111.4(3) |
| C(34)-C(35)-H(35A)  | 109.4    |
| C(36)-C(35)-H(35A)  | 109.4    |
| C(34)-C(35)-H(35B)  | 109.4    |
| C(36)-C(35)-H(35B)  | 109.4    |
| H(35A)-C(35)-H(35B) | 108.0    |
| C(31)-C(36)-C(35)   | 110.9(3) |
| C(31)-C(36)-H(36A)  | 109.5    |
| C(35)-C(36)-H(36A)  | 109.5    |
| C(31)-C(36)-H(36B)  | 109.5    |
| C(35)-C(36)-H(36B)  | 109.5    |
| H(36A)-C(36)-H(36B) | 108.0    |
| C(46)-C(41)-C(42)   | 112.1(6) |
| C(46)-C(41)-N(1)    | 108.0(5) |
| C(42)-C(41)-N(1)    | 113.8(5) |
| C(46)-C(41)-H(41)   | 107.6    |
| C(42)-C(41)-H(41)   | 107.6    |
| N(1)-C(41)-H(41)    | 107.6    |
| C(41)-C(42)-C(43)   | 111.5(5) |
| C(41)-C(42)-H(42A)  | 109.3    |
| C(43)-C(42)-H(42A)  | 109.3    |
| C(41)-C(42)-H(42B)  | 109.3    |
| C(43)-C(42)-H(42B)  | 109.3    |
| H(42A)-C(42)-H(42B) | 108.0    |
| C(44)-C(43)-C(42)   | 112.5(5) |
| C(44)-C(43)-H(43A)  | 109.1    |
| C(42)-C(43)-H(43A)  | 109.1    |
| C(44)-C(43)-H(43B)  | 109.1    |
| C(42)-C(43)-H(43B)  | 109.1    |

|                      |           |
|----------------------|-----------|
| H(43A)-C(43)-H(43B)  | 107.8     |
| C(45)-C(44)-C(43)    | 111.5(7)  |
| C(45)-C(44)-H(44A)   | 109.3     |
| C(43)-C(44)-H(44A)   | 109.3     |
| C(45)-C(44)-H(44B)   | 109.3     |
| C(43)-C(44)-H(44B)   | 109.3     |
| H(44A)-C(44)-H(44B)  | 108.0     |
| C(44)-C(45)-C(46)    | 112.8(6)  |
| C(44)-C(45)-H(45A)   | 109.0     |
| C(46)-C(45)-H(45A)   | 109.0     |
| C(44)-C(45)-H(45B)   | 109.0     |
| C(46)-C(45)-H(45B)   | 109.0     |
| H(45A)-C(45)-H(45B)  | 107.8     |
| C(41)-C(46)-C(45)    | 110.5(5)  |
| C(41)-C(46)-H(46A)   | 109.6     |
| C(45)-C(46)-H(46A)   | 109.6     |
| C(41)-C(46)-H(46B)   | 109.6     |
| C(45)-C(46)-H(46B)   | 109.6     |
| H(46A)-C(46)-H(46B)  | 108.1     |
| C(46A)-C(41A)-C(42A) | 111.8(9)  |
| C(46A)-C(41A)-N(1)   | 115.1(8)  |
| C(42A)-C(41A)-N(1)   | 105.2(7)  |
| C(46A)-C(41A)-H(41A) | 108.2     |
| C(42A)-C(41A)-H(41A) | 108.2     |
| N(1)-C(41A)-H(41A)   | 108.2     |
| C(41A)-C(42A)-C(43A) | 110.4(9)  |
| C(41A)-C(42A)-H(42C) | 109.6     |
| C(43A)-C(42A)-H(42C) | 109.6     |
| C(41A)-C(42A)-H(42D) | 109.6     |
| C(43A)-C(42A)-H(42D) | 109.6     |
| H(42C)-C(42A)-H(42D) | 108.1     |
| C(42A)-C(43A)-C(44A) | 109.9(11) |
| C(42A)-C(43A)-H(43C) | 109.7     |
| C(44A)-C(43A)-H(43C) | 109.7     |
| C(42A)-C(43A)-H(43D) | 109.7     |
| C(44A)-C(43A)-H(43D) | 109.7     |

|                      |           |
|----------------------|-----------|
| H(43C)-C(43A)-H(43D) | 108.2     |
| C(45A)-C(44A)-C(43A) | 107.6(11) |
| C(45A)-C(44A)-H(44C) | 110.2     |
| C(43A)-C(44A)-H(44C) | 110.2     |
| C(45A)-C(44A)-H(44D) | 110.2     |
| C(43A)-C(44A)-H(44D) | 110.2     |
| H(44C)-C(44A)-H(44D) | 108.5     |
| C(44A)-C(45A)-C(46A) | 108.3(10) |
| C(44A)-C(45A)-H(45C) | 110.0     |
| C(46A)-C(45A)-H(45C) | 110.0     |
| C(44A)-C(45A)-H(45D) | 110.0     |
| C(46A)-C(45A)-H(45D) | 110.0     |
| H(45C)-C(45A)-H(45D) | 108.4     |
| C(41A)-C(46A)-C(45A) | 108.4(9)  |
| C(41A)-C(46A)-H(46C) | 110.0     |
| C(45A)-C(46A)-H(46C) | 110.0     |
| C(41A)-C(46A)-H(46D) | 110.0     |
| C(45A)-C(46A)-H(46D) | 110.0     |
| H(46C)-C(46A)-H(46D) | 108.4     |
| N(1)-C(41B)-C(46B)   | 111.8(10) |
| N(1)-C(41B)-C(42B)   | 100.0(9)  |
| C(46B)-C(41B)-C(42B) | 113.3(11) |
| N(1)-C(41B)-H(41B)   | 110.5     |
| C(46B)-C(41B)-H(41B) | 110.5     |
| C(42B)-C(41B)-H(41B) | 110.5     |
| C(41B)-C(42B)-C(43B) | 106.0(9)  |
| C(41B)-C(42B)-H(42E) | 110.5     |
| C(43B)-C(42B)-H(42E) | 110.5     |
| C(41B)-C(42B)-H(42F) | 110.5     |
| C(43B)-C(42B)-H(42F) | 110.5     |
| H(42E)-C(42B)-H(42F) | 108.7     |
| C(44B)-C(43B)-C(42B) | 111.9(11) |
| C(44B)-C(43B)-H(43E) | 109.2     |
| C(42B)-C(43B)-H(43E) | 109.2     |
| C(44B)-C(43B)-H(43F) | 109.2     |
| C(42B)-C(43B)-H(43F) | 109.2     |

|                      |           |
|----------------------|-----------|
| H(43E)-C(43B)-H(43F) | 107.9     |
| C(43B)-C(44B)-C(45B) | 110.3(13) |
| C(43B)-C(44B)-H(44E) | 109.6     |
| C(45B)-C(44B)-H(44E) | 109.6     |
| C(43B)-C(44B)-H(44F) | 109.6     |
| C(45B)-C(44B)-H(44F) | 109.6     |
| H(44E)-C(44B)-H(44F) | 108.1     |
| C(44B)-C(45B)-C(46B) | 111.2(11) |
| C(44B)-C(45B)-H(45E) | 109.4     |
| C(46B)-C(45B)-H(45E) | 109.4     |
| C(44B)-C(45B)-H(45F) | 109.4     |
| C(46B)-C(45B)-H(45F) | 109.4     |
| H(45E)-C(45B)-H(45F) | 108.0     |
| C(41B)-C(46B)-C(45B) | 105.5(9)  |
| C(41B)-C(46B)-H(46E) | 110.6     |
| C(45B)-C(46B)-H(46E) | 110.6     |
| C(41B)-C(46B)-H(46F) | 110.6     |
| C(45B)-C(46B)-H(46F) | 110.6     |
| H(46E)-C(46B)-H(46F) | 108.8     |
| H(1W1)-O(1W)-H(1W2)  | 97(4)     |

---

Symmetry transformations used to generate equivalent atoms:

Table 4. Anisotropic displacement parameters ( $\text{\AA}^2 \times 10^3$ ) for D11026. The anisotropic displacement factor exponent takes the form:  $-2p^2 [ h^2 a^{*2} U^{11} + \dots + 2 h k a^* b^* U^{12} ]$

|        | U <sup>11</sup> | U <sup>22</sup> | U <sup>33</sup> | U <sup>23</sup> | U <sup>13</sup> | U <sup>12</sup> |
|--------|-----------------|-----------------|-----------------|-----------------|-----------------|-----------------|
| C(1)   | 48(1)           | 42(1)           | 50(1)           | 4(1)            | 1(1)            | 2(1)            |
| C(6)   | 48(1)           | 46(1)           | 50(1)           | -1(1)           | 9(1)            | -2(1)           |
| O(1)   | 48(1)           | 69(1)           | 64(1)           | 8(1)            | -4(1)           | -6(1)           |
| O(2)   | 72(1)           | 53(1)           | 54(1)           | -1(1)           | 16(1)           | -12(1)          |
| C(7)   | 85(2)           | 66(2)           | 80(2)           | -16(2)          | 41(2)           | -32(2)          |
| C(8)   | 121(3)          | 71(2)           | 86(2)           | -25(2)          | 43(2)           | -36(2)          |
| O(3)   | 38(1)           | 39(1)           | 64(1)           | 4(1)            | 5(1)            | 1(1)            |
| O(4)   | 57(1)           | 62(1)           | 68(1)           | 8(1)            | 8(1)            | 18(1)           |
| C(10)  | 35(1)           | 49(1)           | 61(2)           | 1(1)            | -1(1)           | 2(1)            |
| C(11)  | 37(1)           | 43(1)           | 59(1)           | -1(1)           | -6(1)           | -2(1)           |
| C(12)  | 41(1)           | 40(1)           | 64(2)           | -1(1)           | -5(1)           | 3(1)            |
| C(13)  | 54(2)           | 51(2)           | 60(2)           | -1(1)           | 0(1)            | -2(1)           |
| C(14)  | 69(2)           | 46(1)           | 62(2)           | 4(1)            | -6(1)           | 3(1)            |
| C(15)  | 68(2)           | 44(2)           | 73(2)           | 1(1)            | -3(1)           | 13(1)           |
| C(16)  | 54(2)           | 46(1)           | 64(2)           | -2(1)           | -3(1)           | 8(1)            |
| C(2)   | 51(1)           | 35(1)           | 54(1)           | 5(1)            | -1(1)           | -1(1)           |
| C(17)  | 70(2)           | 49(2)           | 53(1)           | 7(1)            | -3(1)           | 9(1)            |
| C(18)  | 63(3)           | 48(3)           | 44(2)           | 0(2)            | 6(2)            | 4(2)            |
| C(19)  | 74(3)           | 56(3)           | 44(2)           | 3(2)            | 6(2)            | 0(2)            |
| C(20)  | 75(4)           | 79(3)           | 48(3)           | -5(2)           | 14(2)           | 7(3)            |
| C(21)  | 117(6)          | 96(5)           | 58(3)           | -12(4)          | 3(4)            | 51(4)           |
| C(22)  | 77(3)           | 65(3)           | 45(2)           | -2(2)           | 2(2)            | 23(3)           |
| C(18A) | 47(4)           | 53(4)           | 58(4)           | 7(3)            | 0(3)            | 15(4)           |
| C(19A) | 101(7)          | 84(5)           | 72(5)           | 22(4)           | 24(5)           | 27(5)           |
| C(20A) | 109(8)          | 82(5)           | 59(6)           | 3(5)            | 26(5)           | 23(6)           |
| C(21A) | 80(6)           | 60(4)           | 67(5)           | -13(4)          | 16(4)           | 2(4)            |
| C(22A) | 65(5)           | 61(4)           | 75(4)           | -7(3)           | 18(3)           | -1(3)           |
| C(3)   | 53(1)           | 39(1)           | 53(1)           | 6(1)            | 2(1)            | 8(1)            |
| C(4)   | 51(1)           | 32(1)           | 51(1)           | 6(1)            | 0(1)            | 0(1)            |
| C(23)  | 54(1)           | 33(1)           | 53(1)           | 3(1)            | -1(1)           | 1(1)            |
| O(5)   | 53(1)           | 40(1)           | 63(1)           | -9(1)           | -7(1)           | 2(1)            |

|        |       |        |       |        |        |        |
|--------|-------|--------|-------|--------|--------|--------|
| O(6)   | 79(1) | 55(1)  | 58(1) | -4(1)  | -16(1) | 25(1)  |
| C(5)   | 54(2) | 52(2)  | 59(2) | -7(1)  | -4(1)  | 10(1)  |
| N(1)   | 50(1) | 60(1)  | 47(1) | -5(1)  | 6(1)   | 6(1)   |
| C(31)  | 41(1) | 48(1)  | 62(2) | -4(1)  | 7(1)   | 6(1)   |
| C(32)  | 43(2) | 88(2)  | 62(2) | -14(2) | 8(1)   | -3(2)  |
| C(33)  | 50(2) | 88(2)  | 84(2) | -17(2) | 17(2)  | -14(2) |
| C(34)  | 56(2) | 66(2)  | 75(2) | 3(2)   | 17(1)  | -1(1)  |
| C(35)  | 63(2) | 64(2)  | 70(2) | 15(2)  | 1(1)   | -8(1)  |
| C(36)  | 59(2) | 52(2)  | 56(2) | 6(1)   | -2(1)  | -2(1)  |
| C(41)  | 44(3) | 44(3)  | 36(3) | -6(3)  | 8(2)   | 4(2)   |
| C(42)  | 44(2) | 32(2)  | 41(3) | -6(2)  | 10(2)  | -4(2)  |
| C(43)  | 44(2) | 55(3)  | 52(3) | -6(2)  | 11(2)  | 0(2)   |
| C(44)  | 42(3) | 71(4)  | 70(5) | 3(4)   | 2(3)   | -10(3) |
| C(45)  | 58(3) | 67(4)  | 98(5) | -34(3) | -1(3)  | -12(3) |
| C(46)  | 56(3) | 50(3)  | 75(4) | -22(3) | 13(3)  | -5(3)  |
| C(41A) | 58(4) | 40(5)  | 53(5) | -8(4)  | 16(4)  | -16(4) |
| C(42A) | 52(4) | 56(4)  | 83(6) | -6(5)  | 11(5)  | -7(3)  |
| C(43A) | 55(4) | 91(5)  | 97(7) | -6(6)  | 22(6)  | -20(4) |
| C(44A) | 60(5) | 105(6) | 80(7) | -1(5)  | 7(5)   | -39(4) |
| C(45A) | 85(5) | 71(4)  | 79(6) | 9(4)   | 8(4)   | -47(4) |
| C(46A) | 76(5) | 51(4)  | 72(6) | 5(4)   | 18(5)  | -20(4) |
| C(41B) | 49(5) | 39(6)  | 49(6) | -3(5)  | 1(4)   | 6(5)   |
| C(42B) | 56(4) | 49(5)  | 55(5) | 2(4)   | 9(4)   | 5(5)   |
| C(43B) | 63(5) | 72(7)  | 54(5) | 1(5)   | 16(4)  | 4(5)   |
| C(44B) | 55(5) | 63(6)  | 67(6) | -3(5)  | 10(4)  | -6(5)  |
| C(45B) | 40(4) | 57(6)  | 61(6) | -4(5)  | 2(4)   | -5(5)  |
| C(46B) | 42(5) | 42(5)  | 56(5) | -3(4)  | -1(4)  | -2(4)  |
| O(1W)  | 67(1) | 47(1)  | 52(1) | -5(1)  | 12(1)  | -6(1)  |

---

Table 5. Hydrogen coordinates ( $\times 10^4$ ) and isotropic displacement parameters ( $\text{\AA}^2 \times 10^{-3}$ ) for D11026.

|        | x    | y     | z    | U(eq) |
|--------|------|-------|------|-------|
| H(7A)  | 7449 | 2716  | 1589 | 90    |
| H(7B)  | 7871 | 1878  | 2376 | 90    |
| H(8A)  | 6412 | 4310  | 2417 | 136   |
| H(8B)  | 8088 | 4200  | 2576 | 136   |
| H(8C)  | 7085 | 3515  | 3173 | 136   |
| H(12)  | 3056 | -1383 | 4318 | 59    |
| H(13)  | 3027 | -2905 | 5345 | 66    |
| H(14)  | 4377 | -4820 | 5319 | 72    |
| H(15)  | 5724 | -5217 | 4250 | 74    |
| H(16)  | 5787 | -3691 | 3227 | 66    |
| H(2)   | 3481 | 2724  | 2797 | 56    |
| H(17A) | 1655 | 1129  | 3643 | 69    |
| H(17B) | 3215 | 1437  | 4017 | 69    |
| H(17C) | 3249 | 1920  | 4043 | 69    |
| H(17D) | 2093 | 868   | 3727 | 69    |
| H(18)  | 2656 | 3748  | 3909 | 62    |
| H(19A) | 1210 | 2102  | 4971 | 69    |
| H(19B) | 2532 | 3050  | 5201 | 69    |
| H(20A) | -126 | 3763  | 5320 | 80    |
| H(20B) | 1153 | 4793  | 5303 | 80    |
| H(21A) | 453  | 5419  | 4091 | 109   |
| H(21B) | -970 | 4599  | 4182 | 109   |
| H(22A) | -152 | 2794  | 3547 | 75    |
| H(22B) | 629  | 3934  | 3084 | 75    |
| H(18A) | 332  | 2616  | 3481 | 63    |
| H(19C) | 67   | 2028  | 4774 | 102   |
| H(19D) | 1584 | 2610  | 5090 | 102   |
| H(20C) | -951 | 4003  | 4764 | 98    |
| H(20D) | 372  | 4412  | 5364 | 98    |
| H(21C) | 1078 | 5750  | 4463 | 82    |



|        |          |          |          |    |
|--------|----------|----------|----------|----|
| H(21D) | -207     | 5292     | 3848     | 82 |
| H(22C) | 1539     | 4423     | 3180     | 79 |
| H(22D) | 2599     | 4313     | 3970     | 79 |
| H(3)   | 997      | 2449     | 2139     | 58 |
| H(5A)  | 4082     | 616      | 1332     | 67 |
| H(5B)  | 3211     | -592     | 1667     | 67 |
| H(1A)  | 9370(30) | 630(20)  | 8926(19) | 63 |
| H(1B)  | 9330(30) | 1460(30) | 9578(12) | 63 |
| H(31)  | 8933     | 3225     | 8628     | 60 |
| H(32A) | 11177    | 3013     | 9311     | 77 |
| H(32B) | 11611    | 1915     | 8694     | 77 |
| H(33A) | 12575    | 3929     | 8344     | 88 |
| H(33B) | 11059    | 4616     | 8314     | 88 |
| H(34A) | 11580    | 4157     | 7011     | 78 |
| H(34B) | 11878    | 2646     | 7230     | 78 |
| H(35A) | 9634     | 2806     | 6573     | 79 |
| H(35B) | 9188     | 3905     | 7186     | 79 |
| H(36A) | 8222     | 1880     | 7542     | 67 |
| H(36B) | 9743     | 1198     | 7581     | 67 |
| H(41)  | 7013     | 1778     | 8574     | 50 |
| H(42A) | 7043     | 2837     | 9794     | 46 |
| H(42B) | 7246     | 1470     | 10260    | 46 |
| H(43A) | 4873     | 2032     | 10248    | 60 |
| H(43B) | 4768     | 2272     | 9308     | 60 |
| H(44A) | 5052     | -212     | 10085    | 73 |
| H(44B) | 3721     | 273      | 9520     | 73 |
| H(45A) | 4992     | 171      | 8409     | 89 |
| H(45B) | 5149     | -1213    | 8858     | 89 |
| H(46A) | 7409     | -660     | 9395     | 72 |
| H(46B) | 7345     | -476     | 8449     | 72 |
| H(41A) | 7207     | 576      | 8467     | 59 |
| H(42C) | 6640     | 2626     | 8976     | 76 |
| H(42D) | 6930     | 2105     | 9871     | 76 |
| H(43C) | 4686     | 1213     | 8759     | 96 |
| H(43D) | 4479     | 2069     | 9540     | 96 |
| H(44C) | 5374     | 259      | 10362    | 98 |

|        |          |           |          |    |
|--------|----------|-----------|----------|----|
| H(44D) | 3996     | -187      | 9817     | 98 |
| H(45C) | 5496     | -1011     | 8859     | 94 |
| H(45D) | 5727     | -1774     | 9692     | 94 |
| H(46C) | 7702     | -333      | 10069    | 79 |
| H(46D) | 7983     | -1179     | 9294     | 79 |
| H(41B) | 7394     | 2364      | 9520     | 55 |
| H(42E) | 8143     | 506       | 10309    | 64 |
| H(42F) | 7637     | -471      | 9592     | 64 |
| H(43E) | 5828     | -312      | 10484    | 75 |
| H(43F) | 5805     | 1254      | 10388    | 75 |
| H(44E) | 3916     | 346       | 9607     | 74 |
| H(44F) | 4970     | -567      | 9156     | 74 |
| H(45E) | 4899     | 2240      | 9077     | 64 |
| H(45F) | 4344     | 1280      | 8368     | 64 |
| H(46E) | 6705     | 511       | 8252     | 57 |
| H(46F) | 6659     | 2083      | 8148     | 57 |
| H(1W1) | 300(40)  | -1610(30) | 9030(20) | 82 |
| H(1W2) | 1120(40) | -740(40)  | 9317(16) | 82 |

---

Table 6. Hydrogen bonds for D11026 [ $\text{\AA}$  and  $^\circ$ ].

| D-H...A               | d(D-H)    | d(H...A)  | d(D...A) | $\angle$ (DHA) |
|-----------------------|-----------|-----------|----------|----------------|
| N(1)-H(1A)...O(1W)#1  | 0.858(19) | 1.95(2)   | 2.774(3) | 161(3)         |
| N(1)-H(1B)...O(6)#2   | 0.888(18) | 1.879(19) | 2.765(3) | 175(3)         |
| O(1W)-H(1W1)...O(6)#3 | 0.837(19) | 1.89(2)   | 2.723(3) | 172(4)         |
| O(1W)-H(1W2)...O(5)#4 | 0.844(19) | 1.92(3)   | 2.705(3) | 154(4)         |

Symmetry transformations used to generate equivalent atoms:

#1  $x+1, y, z$     #2  $x+1, y, z+1$     #3  $-x, y-1/2, -z+1$

#4  $x, y, z+1$

# VIII. <sup>1</sup>H NMR Spectra

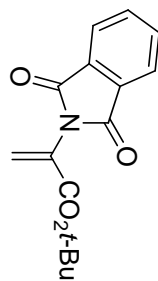

Table 3

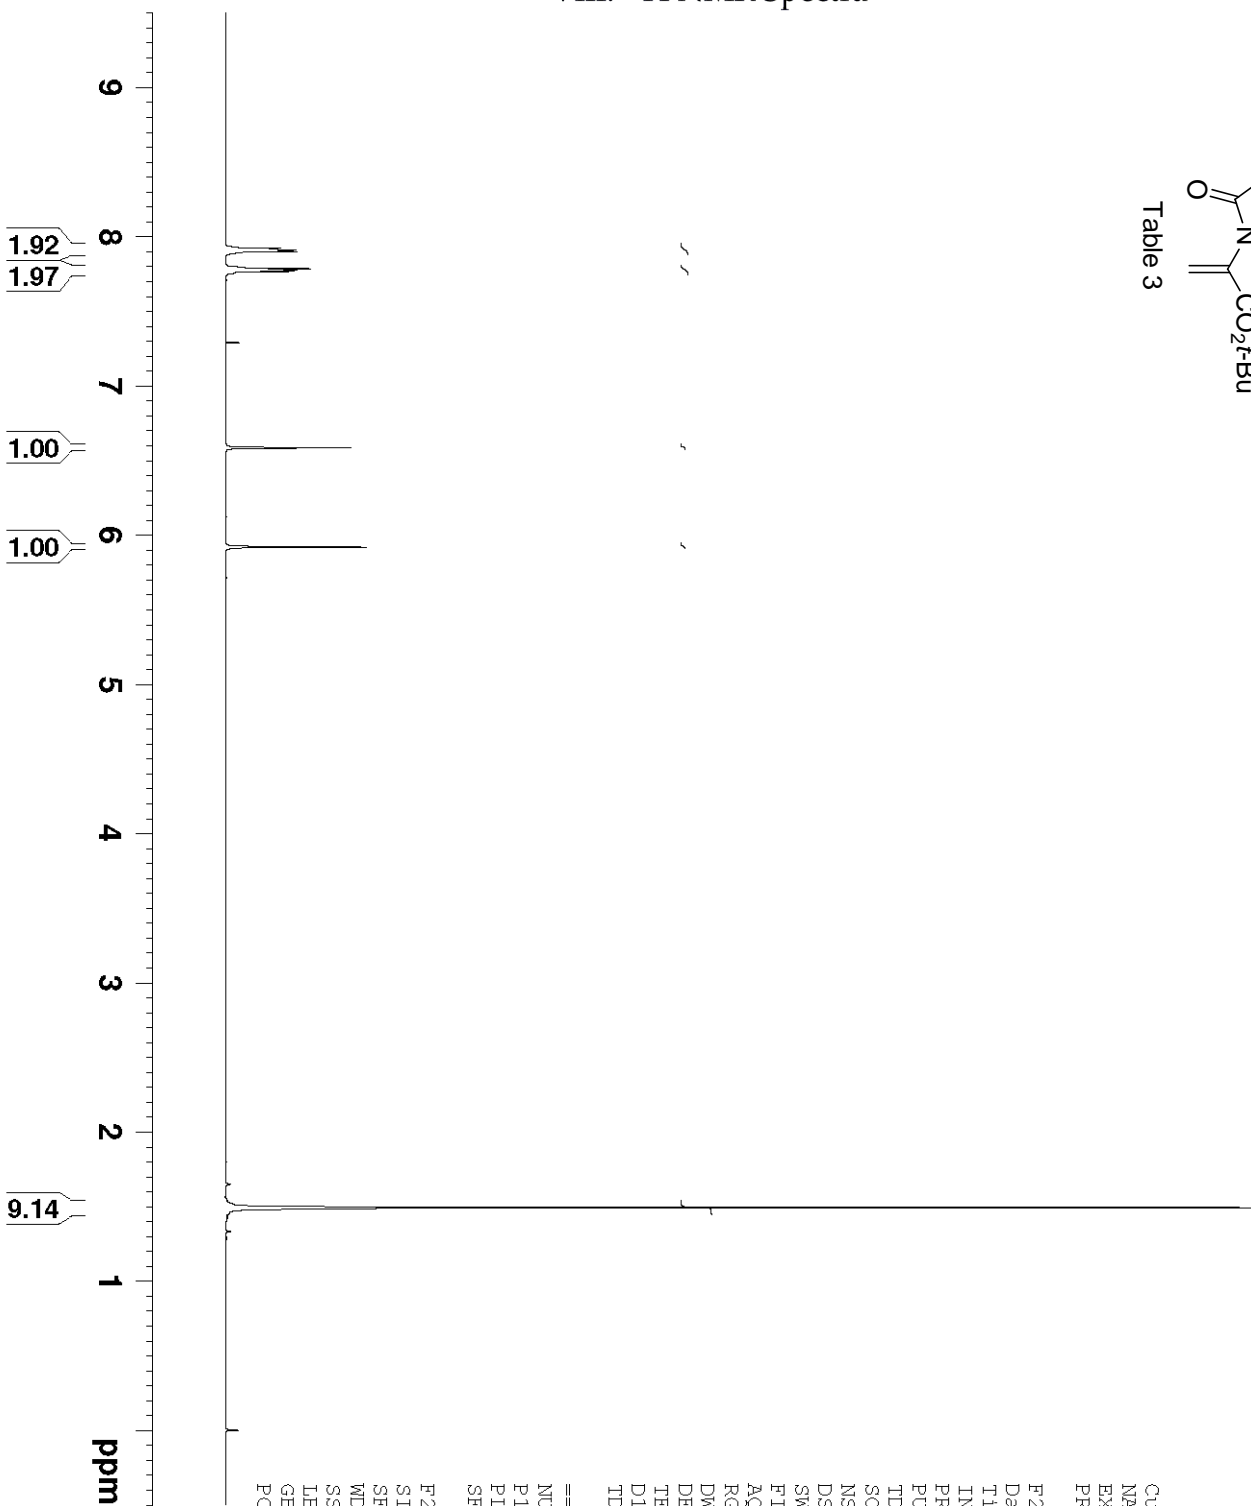

Current Data Parameters  
 NAME YF1019-A  
 EXPNO 5  
 PROCNO 1

F2 - Acquisition Parameters  
 Date\_ 20110301  
 Time 18.55  
 INSTRUM spect  
 PROBHD 5 mm BBO BB-1H  
 PULPROG zg30  
 TD 65536  
 SOLVENT CDCl3  
 NS 4  
 DS 2  
 SMH 8278.146 Hz  
 FIDRES 0.126314 Hz  
 AQ 3.9584243 sec  
 RG 40.3  
 DW 60.400 usec  
 DE 6.00 usec  
 TE 297.2 K  
 D1 1.00000000 sec  
 TD0 1

==== CHANNEL f1 =====  
 NUC1 1H  
 P1 15.07 usec  
 PL1 0.00 dB  
 SFO1 400.1324710 MHz  
 F2 - Processing parameters  
 SI 65536  
 SF 400.1299970 MHz  
 WDW no  
 SSB 0  
 LB 0.00 Hz  
 GB 0  
 PC 1.00

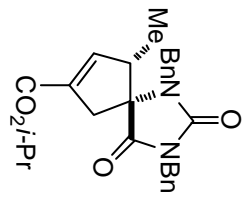

Table 2, entry 1

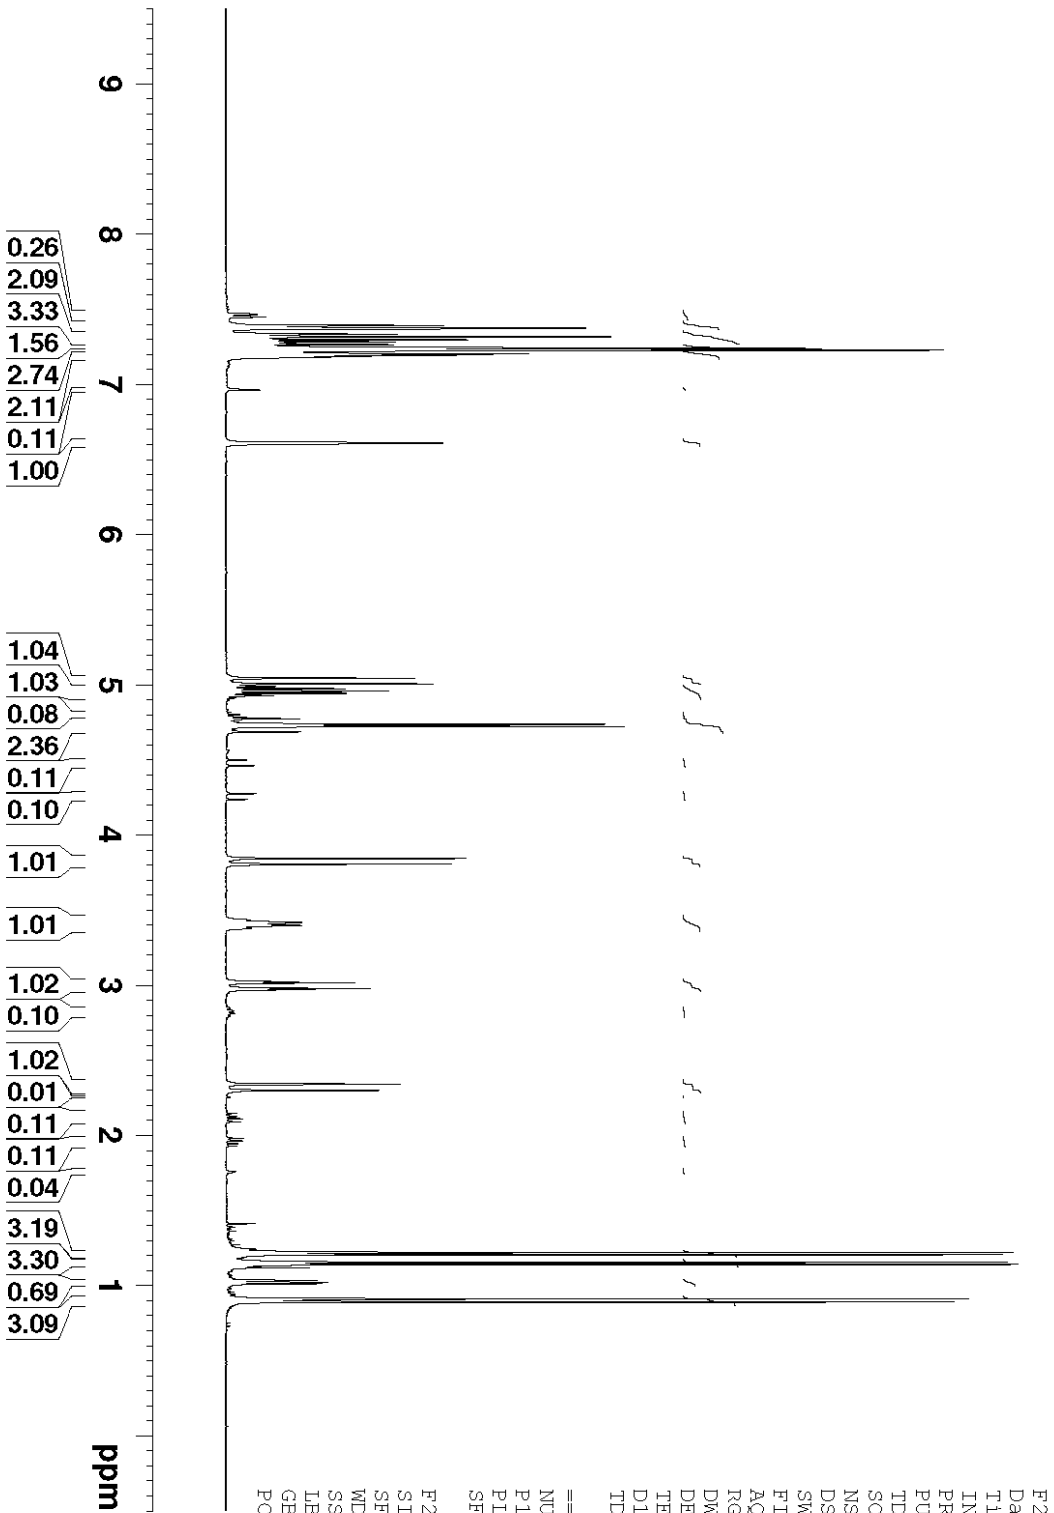

Current Data Parameters  
 NAME YF1048-1  
 EXPNO 1  
 PROCNO 1

F2 - Acquisition Parameters

Date\_ 20110201  
 Time 19.35  
 INSTRUM spect  
 PROBHD 5 mm BBO BB-1H  
 PULPROG zg30  
 TD 65536  
 SOLVENT  
 NS 4  
 DS 2  
 SWH 8278.146 Hz  
 FIDRES 0.126314 Hz  
 AQ 3.9584243 sec  
 RG 35.9  
 DW 60.400 usec  
 DE 6.00 usec  
 TE 296.2 K  
 D1 1.00000000 sec  
 TD0 1

==== CHANNEL f1 =====  
 NUC1 1H  
 P1 15.07 usec  
 PL1 0.00 dB  
 SFO1 400.1324710 MHz

F2 - Processing parameters  
 SI 65536  
 SF 400.1300170 MHz  
 WDW ho  
 SSB 0  
 LB 0.00 Hz  
 GB 0  
 PC 1.00

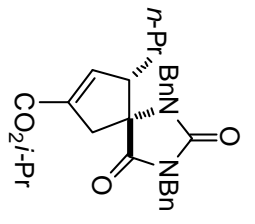

Table 2, entry 2

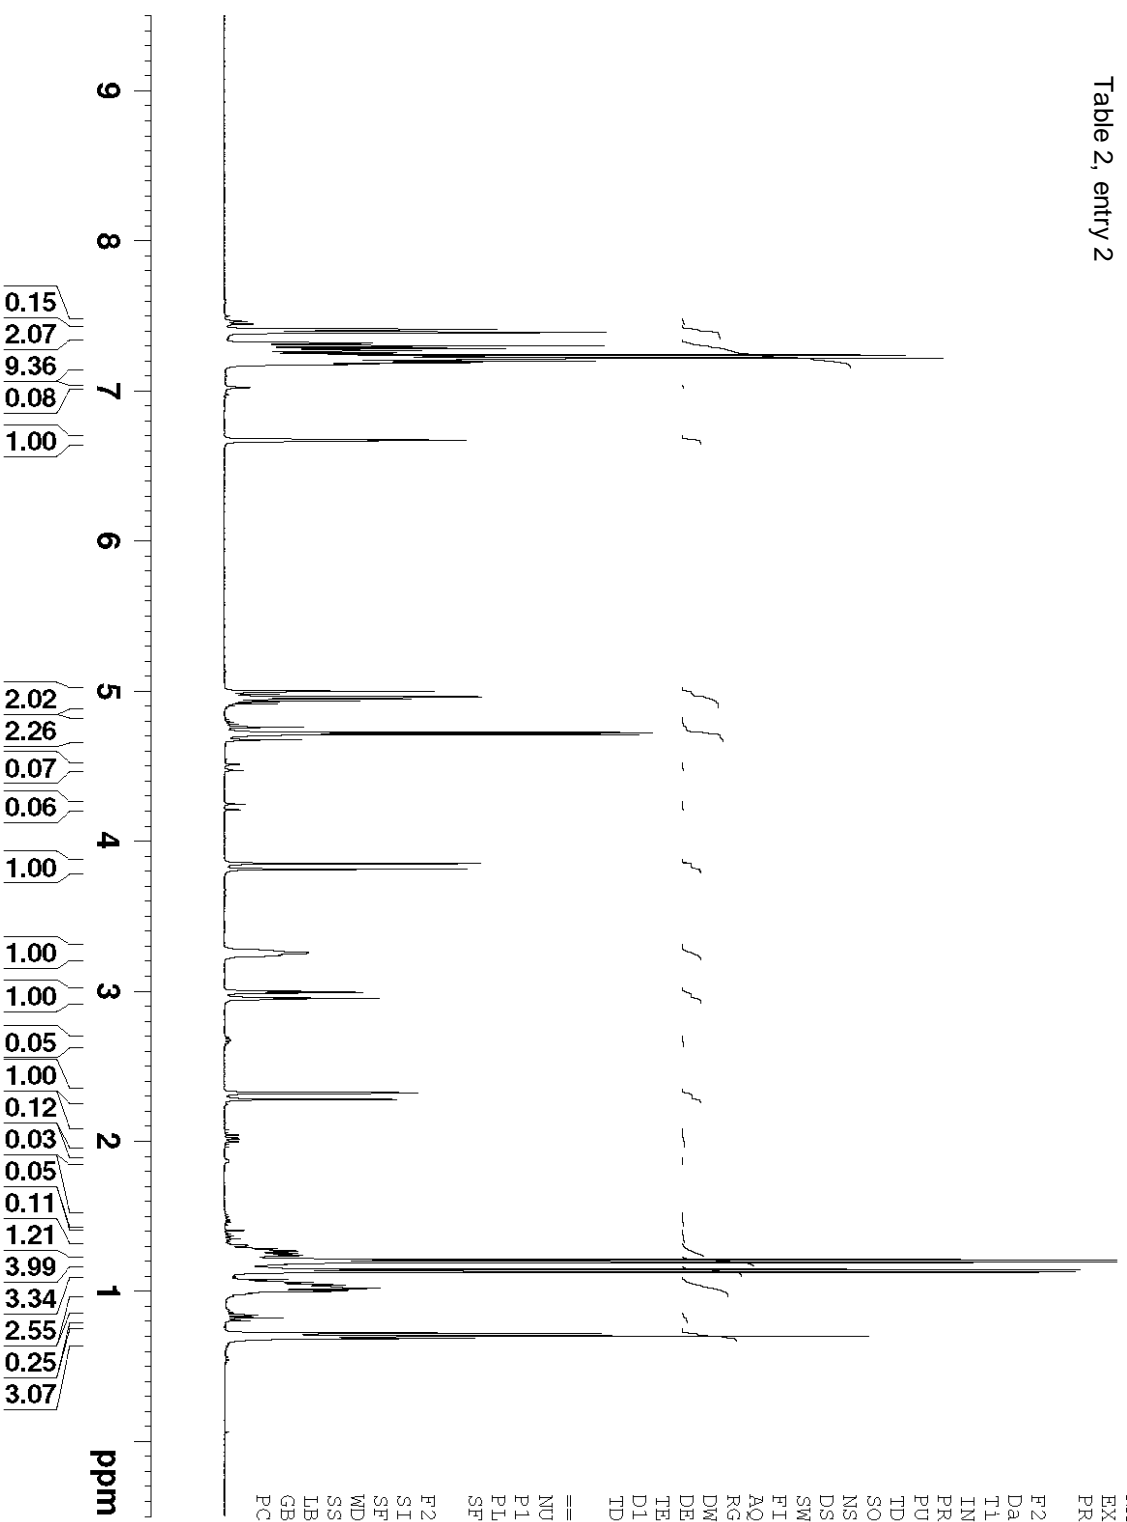

Current Data Parameters  
 NAME YF1049-1  
 EXPNO 1  
 PROCNO 1

F2 - Acquisition Parameters  
 Date\_ 20110201  
 Time 19.46  
 INSTRUM spect  
 PROBHD 5 mm BBO BB-1H  
 PULPROG zg30  
 TD 65536  
 SOLVENT  
 NS 4  
 DS 2  
 SWH 8278.146 Hz  
 FIDRES 0.126314 Hz  
 AQ 3.9584243 sec  
 RG 22.6  
 DW 60.400 usec  
 DE 6.00 usec  
 TE 296.2 K  
 D1 1.00000000 sec  
 TD0 1

==== CHANNEL F1 =====  
 NUC1 1H  
 P1 15.07 usec  
 PL1 0.00 dB  
 SFO1 400.1324710 MHz

F2 - Processing parameters  
 SI 65536  
 SF 400.1300169 MHz  
 WDW no  
 SSB 0  
 LB 0.00 Hz  
 GB 0  
 PC 1.40

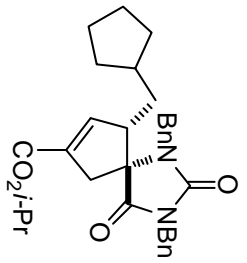

Table 2, entry 3

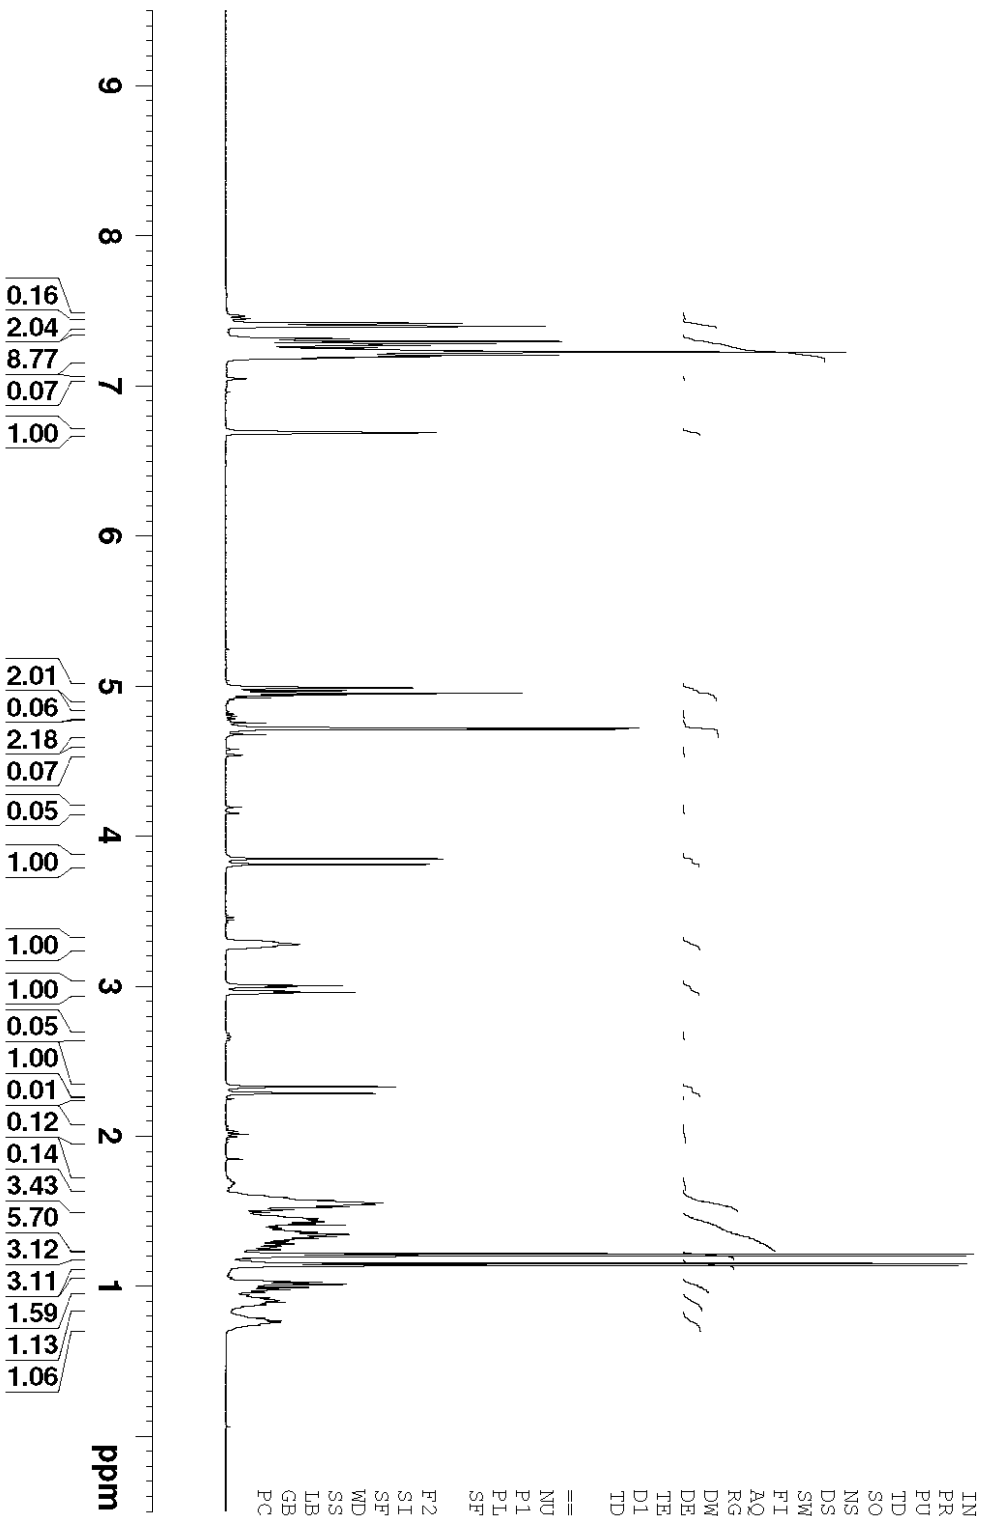

Current Data Parameters  
 NAME YF1051-1  
 EXPNO 1  
 PROCNO 1

F2 - Acquisition Parameters

Date\_ 20110201  
 Time 19.54  
 INSTRUM spect  
 PROBHD 5 mm BBO BB-1H  
 PULPROG zg30  
 TD 65536  
 SOLVENT  
 NS 4  
 DS 2  
 SWH 8278.146 Hz  
 FIDRES 0.126314 Hz  
 AQ 3.9584243 sec  
 RG 22.6  
 DM 60.400 usec  
 DE 6.00 usec  
 TE 296.2 K  
 D1 1.00000000 sec  
 TD0 1

==== CHANNEL F1 =====

NUC1 1H  
 P1 15.07 usec  
 PL1 0.00 dB  
 SFO1 400.1324710 MHz

F2 - Processing parameters

SI 65536  
 SF 400.1300152 MHz  
 WDW no  
 SSB 0  
 LB 0.00 Hz  
 GB 0  
 PC 1.40

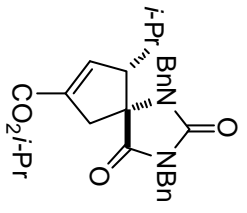

Table 2, entry 4

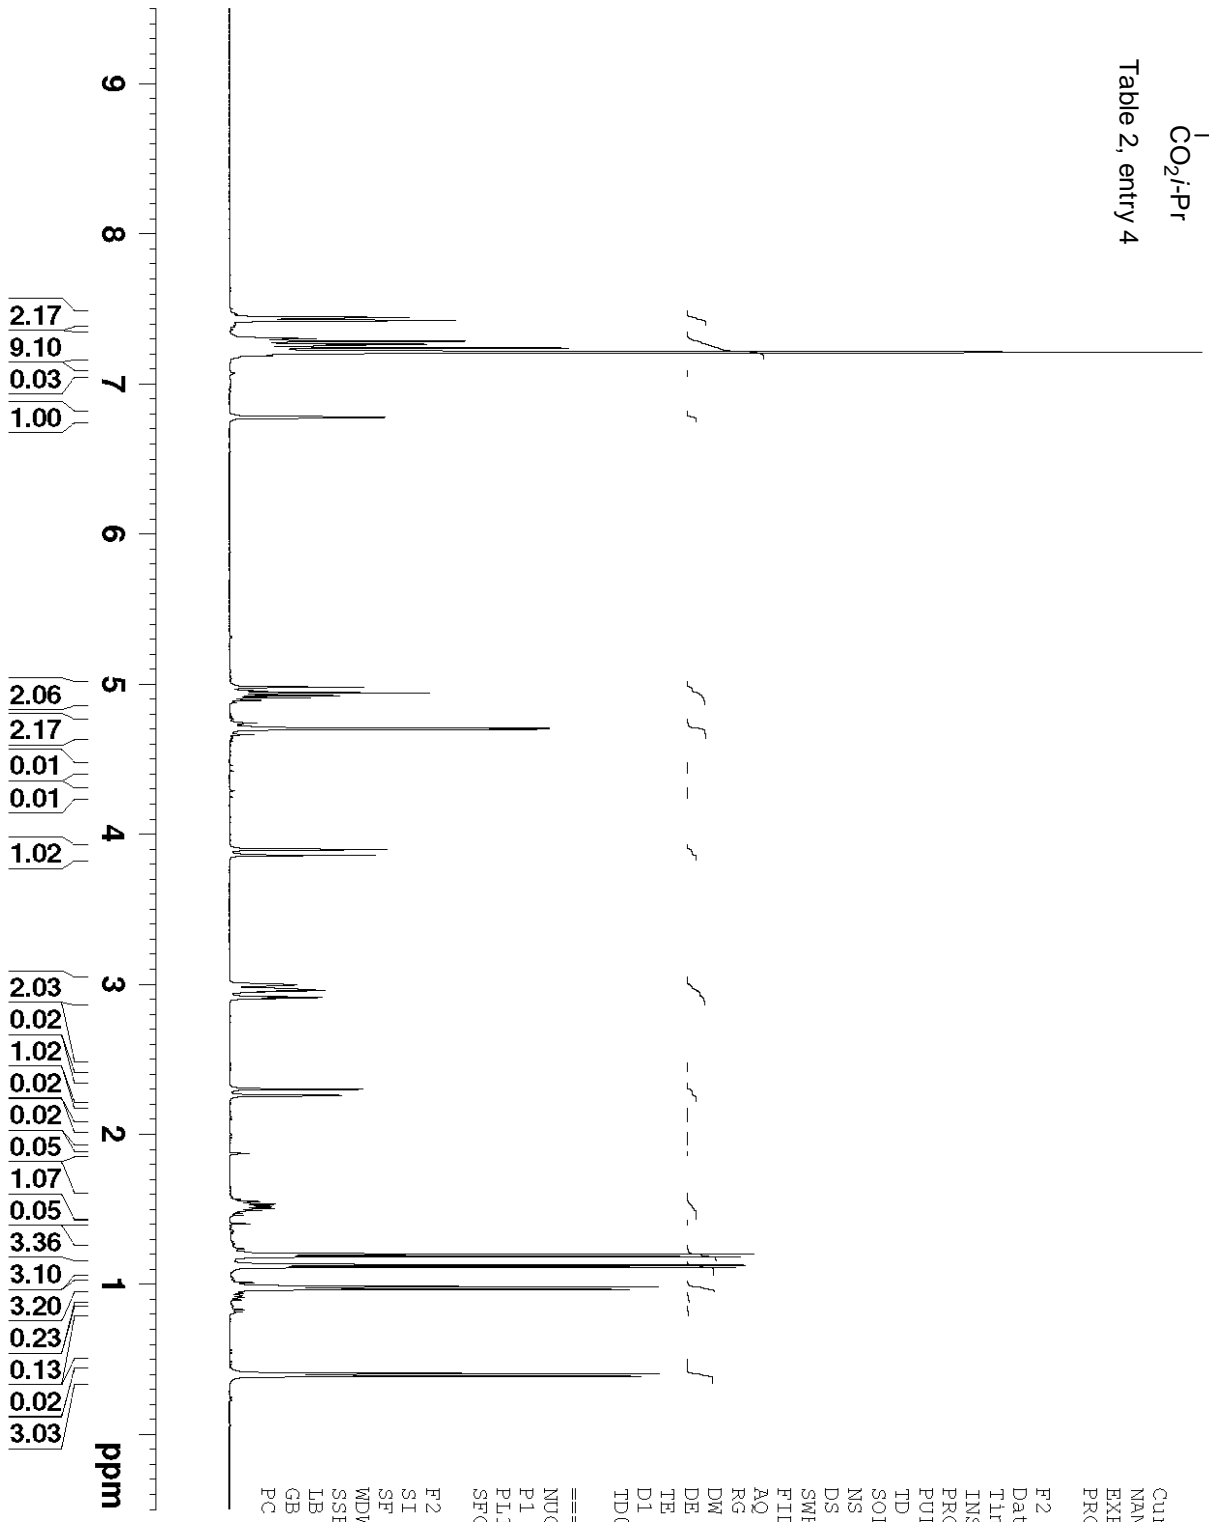

Current Data Parameters  
 NAME: YF1050-1  
 EXPNO: 1  
 PROCNO: 1

F2 - Acquisition Parameters  
 Date\_: 20110202  
 Time: 13.05  
 INSTRUM: spect  
 PROBHD: 5 mm BBO BB-1H  
 PULPROG: zg30  
 TD: 65536  
 SOLVENT: NS  
 DS: 4  
 SWH: 8278.146 Hz  
 FIDRES: 0.126314 Hz  
 AQ: 3.9584243 sec  
 RG: 20.2  
 DW: 60.400 usec  
 DE: 6.00 usec  
 TE: 296.2 K  
 D1: 1.00000000 sec  
 TD0: 1

==== CHANNEL f1 =====  
 NUCL: 1H  
 P1: 15.07 usec  
 PL1: 0.00 dB  
 SF01: 400.1324710 MHz

F2 - Processing parameters  
 SI: 65536  
 SF: 400.1300168 MHz  
 WDW: no  
 SSB: 0  
 LB: 0.00 Hz  
 GB: 0  
 PC: 1.00



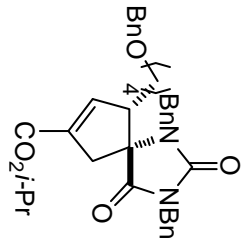

Table 2, entry 5

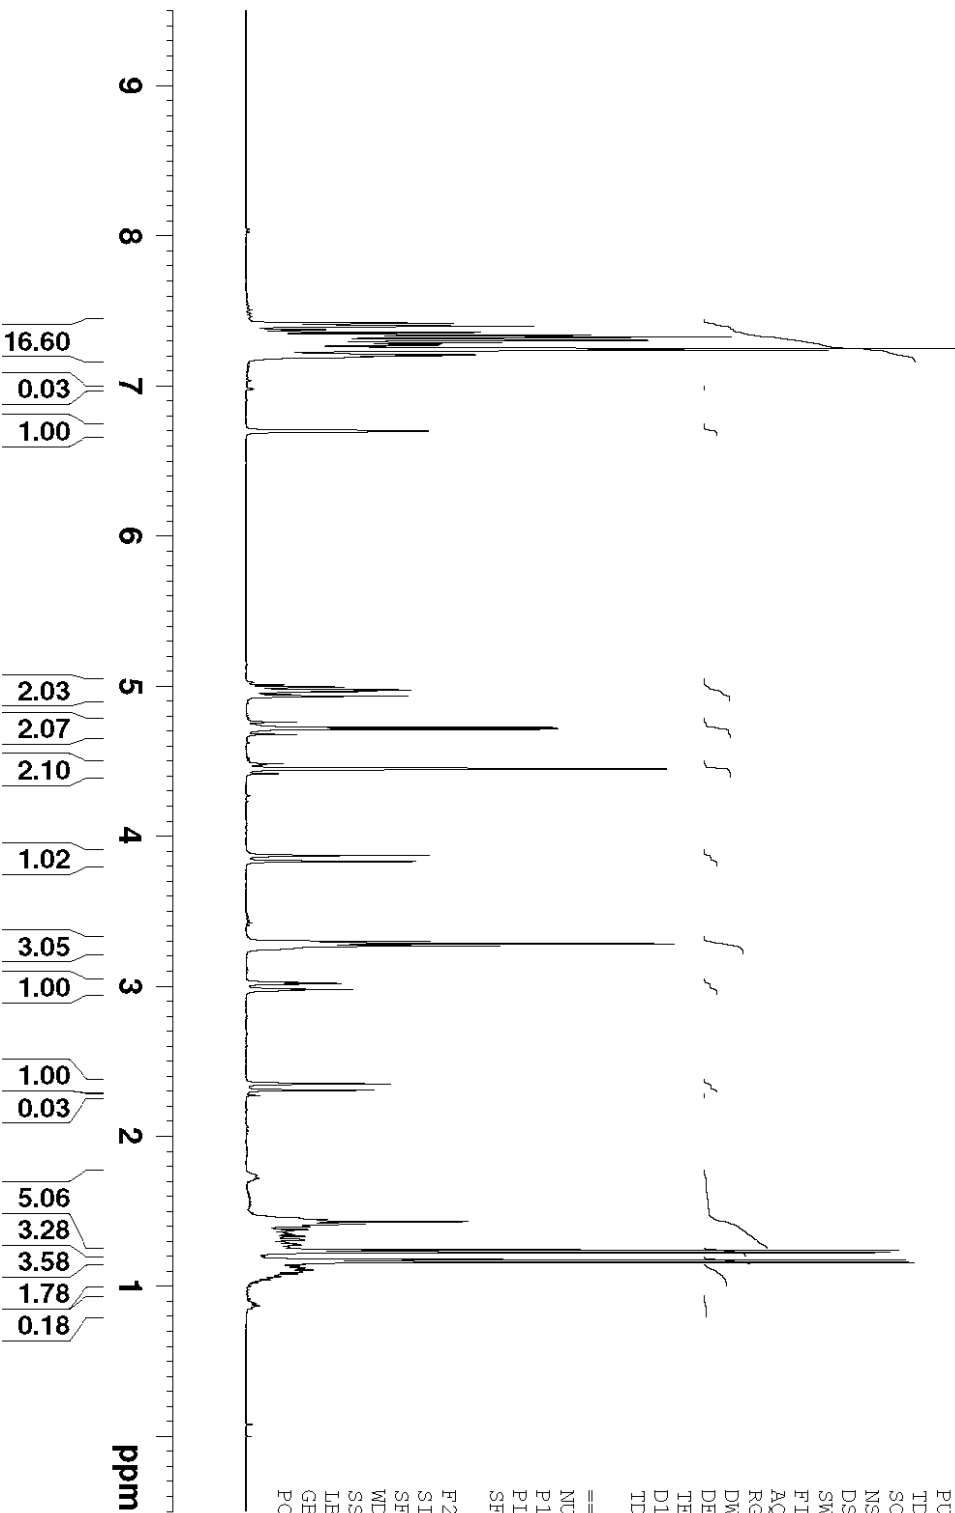

Current Data Parameters  
 NAME YF1137-1  
 EXPNO 1  
 PROCNO 1

F2 - Acquisition Parameters  
 Date\_ 20110311  
 Time 17.23  
 INSTRUM spect  
 PROBHD 5 mm BBO BB-1H  
 PULPROG zg30  
 TD 65536  
 SOLVENT  
 NS 4  
 DS 2  
 SWH 8278.146 Hz  
 FIDRES 0.126314 Hz  
 AQ 3.9584243 sec  
 RG 35.9  
 DW 60.400 usec  
 DE 6.00 usec  
 TE 296.2 K  
 D1 1.00000000 sec  
 TD0 1

===== CHANNEL f1 =====  
 NUCL1 1H  
 P1 15.07 usec  
 PL1 0.00 dB  
 SFO1 400.1324710 MHz

F2 - Processing parameters  
 SI 65536  
 SF 400.1300134 MHz  
 WDW no  
 SSB 0  
 LB 0.00 Hz  
 GB 0  
 PC 1.00

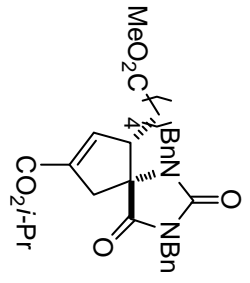

Table 2, entry 6

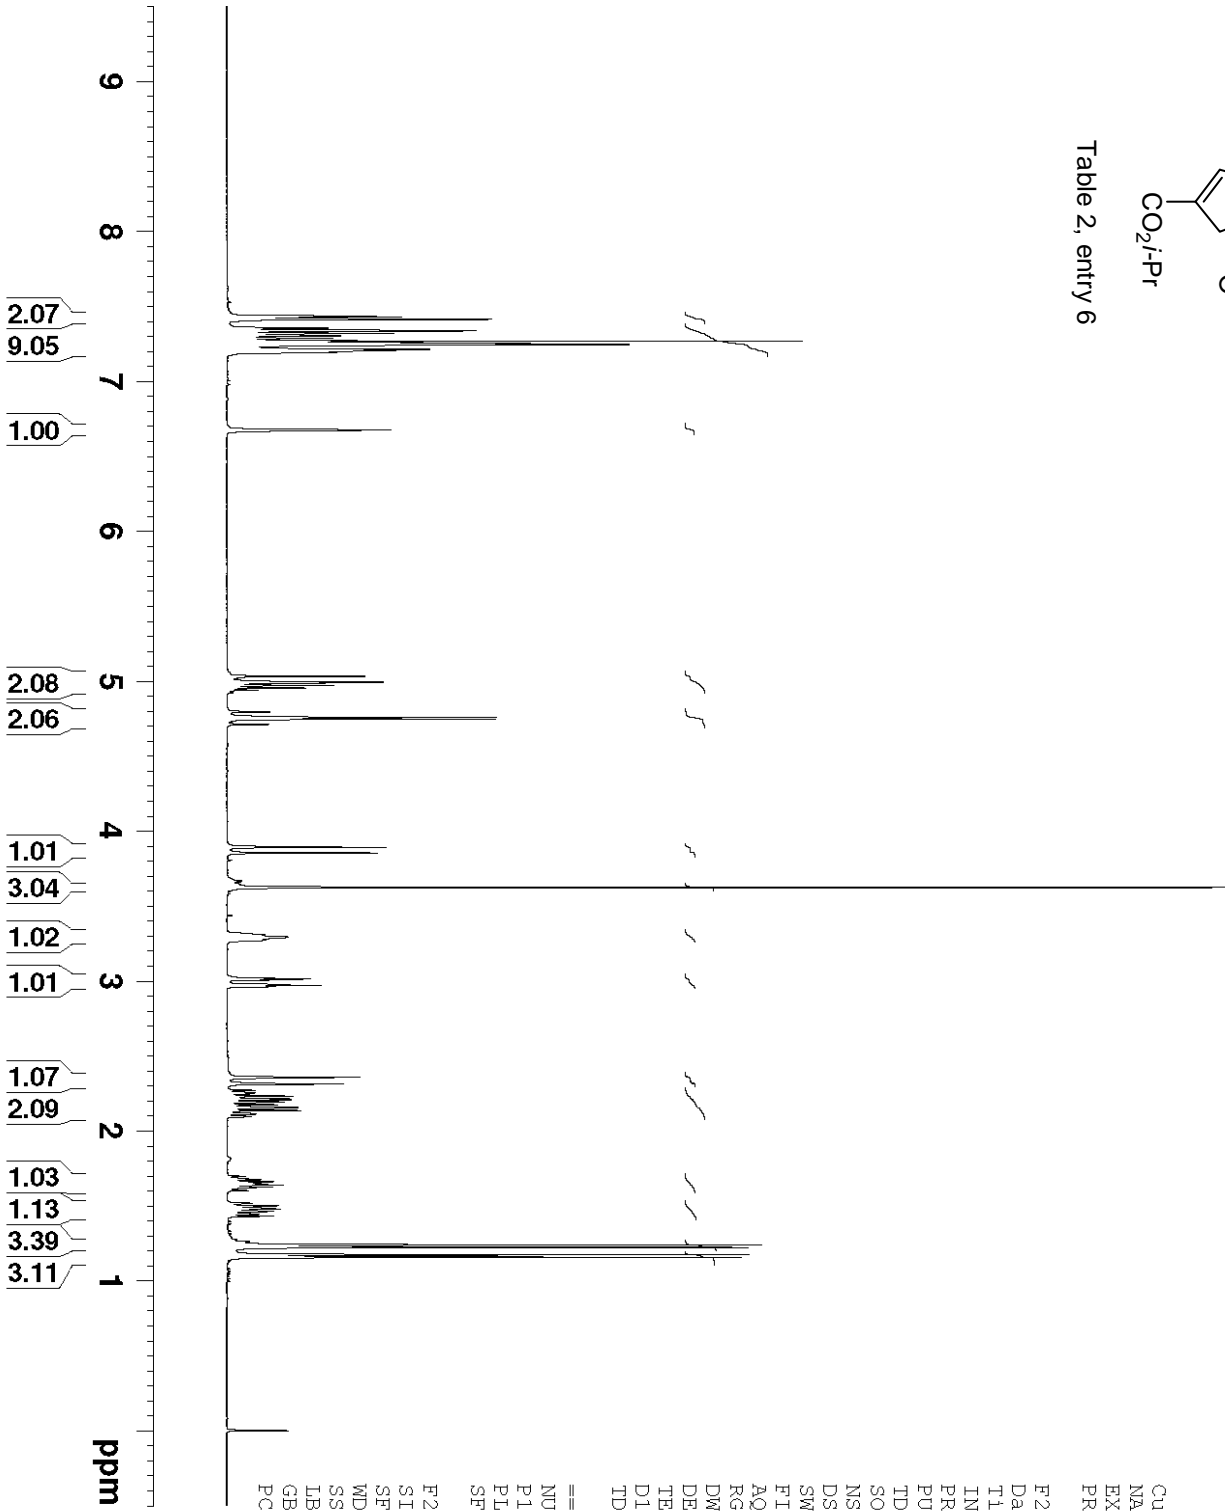

Current Data Parameters  
 NAME YF1054-1  
 EXPNO 1  
 PROCNO 1

F2 - Acquisition Parameters  
 Date\_ 20110202  
 Time 18.09  
 INSTRUM spect  
 PROBHD 5 mm BBO BB-1H  
 PULPROG zg30  
 TD 65536  
 SOLVENT  
 NS 4  
 DS 2  
 SWH 8278.146 Hz  
 FIDRES 0.126314 Hz  
 AQ 3.9584243 sec  
 RG 35.9  
 DW 60.400 usec  
 DE 6.00 usec  
 TE 296.2 K  
 D1 1.00000000 sec  
 TD0 1

==== CHANNEL f1 =====  
 NUCL 1H  
 P1 15.07 usec  
 PL1 0.00 dB  
 SF01 400.1324710 MHz

F2 - Processing parameters  
 SI 65536  
 SF 400.1300052 MHz  
 WDW no  
 SSB 0  
 LB 0.00 Hz  
 GB 0  
 PC 1.00

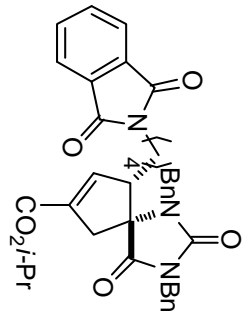

Table 2, entry 7

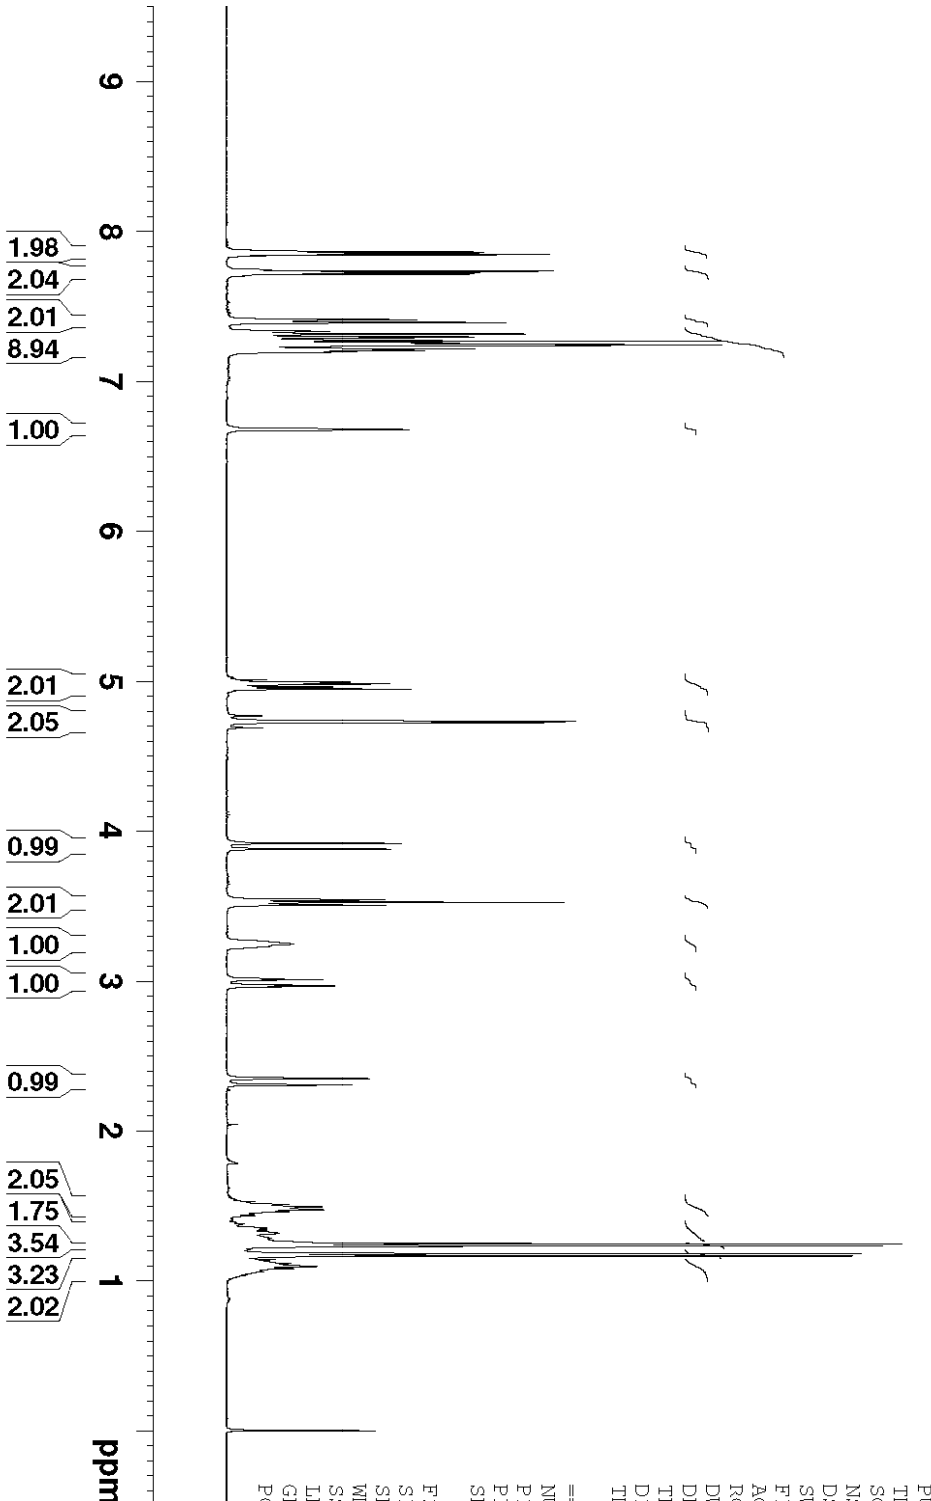

Current Data Parameters  
 NAME YF1052-1  
 EXPNO 1  
 PROCNO 1

F2 - Acquisition Parameters  
 Date\_ 20110205  
 Time 17.48  
 INSTRUM spect  
 PROBHD 5 mm BBO BB-1H  
 PULPROG zg30  
 TD 65536  
 SOLVENT  
 NS 4  
 DS 2  
 SWH 8278.146 Hz  
 FIDRES 0.126314 Hz  
 AQ 3.3584243 sec  
 RG 40.3  
 DW 60.400 usec  
 DE 6.00 usec  
 TE 296.2 K  
 D1 1.00000000 sec  
 TD0 1

===== CHANNEL f1 =====  
 NUC1 1H  
 P1 15.07 usec  
 PL1 0.00 dB  
 SFO1 400.1324710 MHz

F2 - Processing parameters  
 SI 65536  
 SF 400.1300050 MHz  
 WDW no  
 SSB 0  
 LB 0.00 Hz  
 GB 0  
 PC 1.40

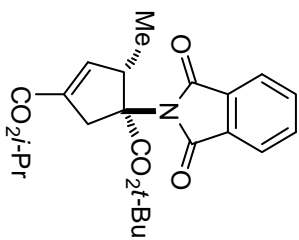

Table 3, entry 1

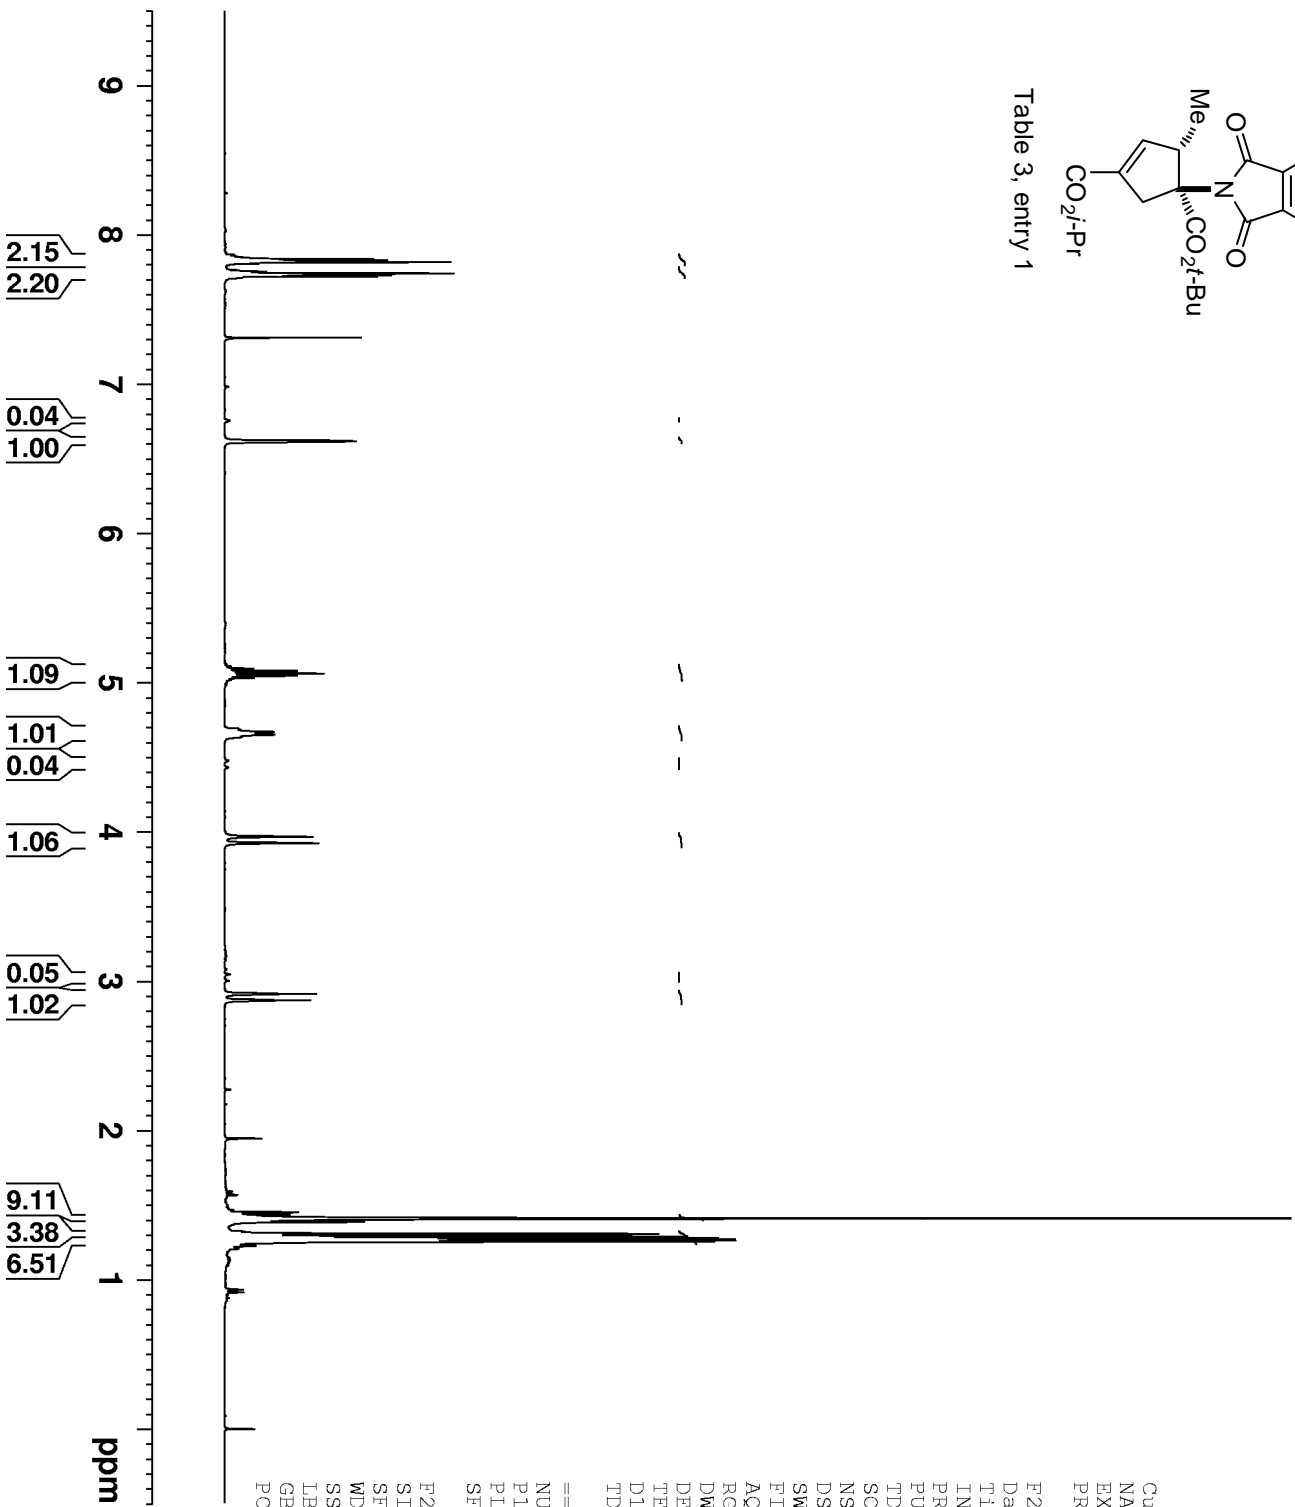

Current Data Parameters  
 NAME YF1082-1  
 EXPNO 1  
 PROCNO 1

F2 - Acquisition Parameters

Date\_ 20110222  
 Time 19.50  
 INSTRUM spect  
 PROBHD 5 mm BBO BB-1H  
 PULPROG zg30  
 TD 65536  
 SOLVENT CDCl3  
 NS 4  
 DS 2  
 SWH 8278.146 Hz  
 FIDRES 0.126314 Hz  
 AQ 3.9584243 sec  
 RG 28.5  
 DW 60.400 usec  
 DE 6.00 usec  
 TE 296.2 K  
 D1 1.00000000 sec  
 TD0 1

==== CHANNEL f1 =====  
 NUC1 1H  
 P1 15.07 usec  
 PL1 0.00 dB  
 SF01 400.1324710 MHz

F2 - Processing parameters  
 SI 65536  
 SF 400.1299885 MHz  
 WDW no  
 SSB 0  
 LB 0.00 Hz  
 GB 0  
 PC 1.00

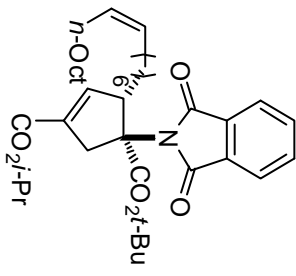

Table 3, entry 2

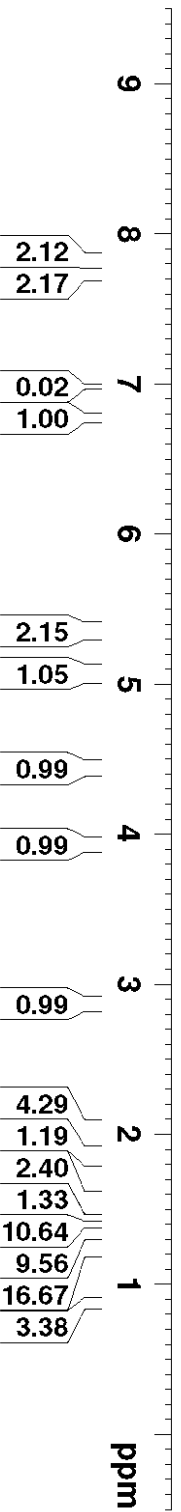

```

Current Data Parameters
NAME      YF1100-2-R
EXPNO     1
PROCNO    1

F2 - Acquisition Parameters
Date_     20110219
Time      18.01
INSTRUM   spect
PROBHD    5 mm BBO BB-1H
PULPROG   zg30
TD         65536
SOLVENT
NS         4
DS         2
SWH        8278.146 Hz
FIDRES     0.126314 Hz
AQ         3.9584243 sec
RG         20.2
DM         60.400 usec
DE         6.00 usec
TE         296.2 K
D1         1.00000000 sec
TD0        1

===== CHANNEL f1 =====
NUC1       1H
P1         15.07 usec
PL1        0.00 dB
SFO1       400.1324710 MHz

F2 - Processing parameters
SI         65536
SF         400.1299968 MHz
WDW        no
SSB        0
LB         0.00 Hz
GB         0
PC         1.40
  
```

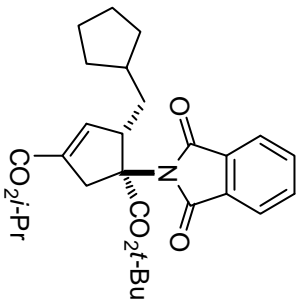

Table 3, entry 3

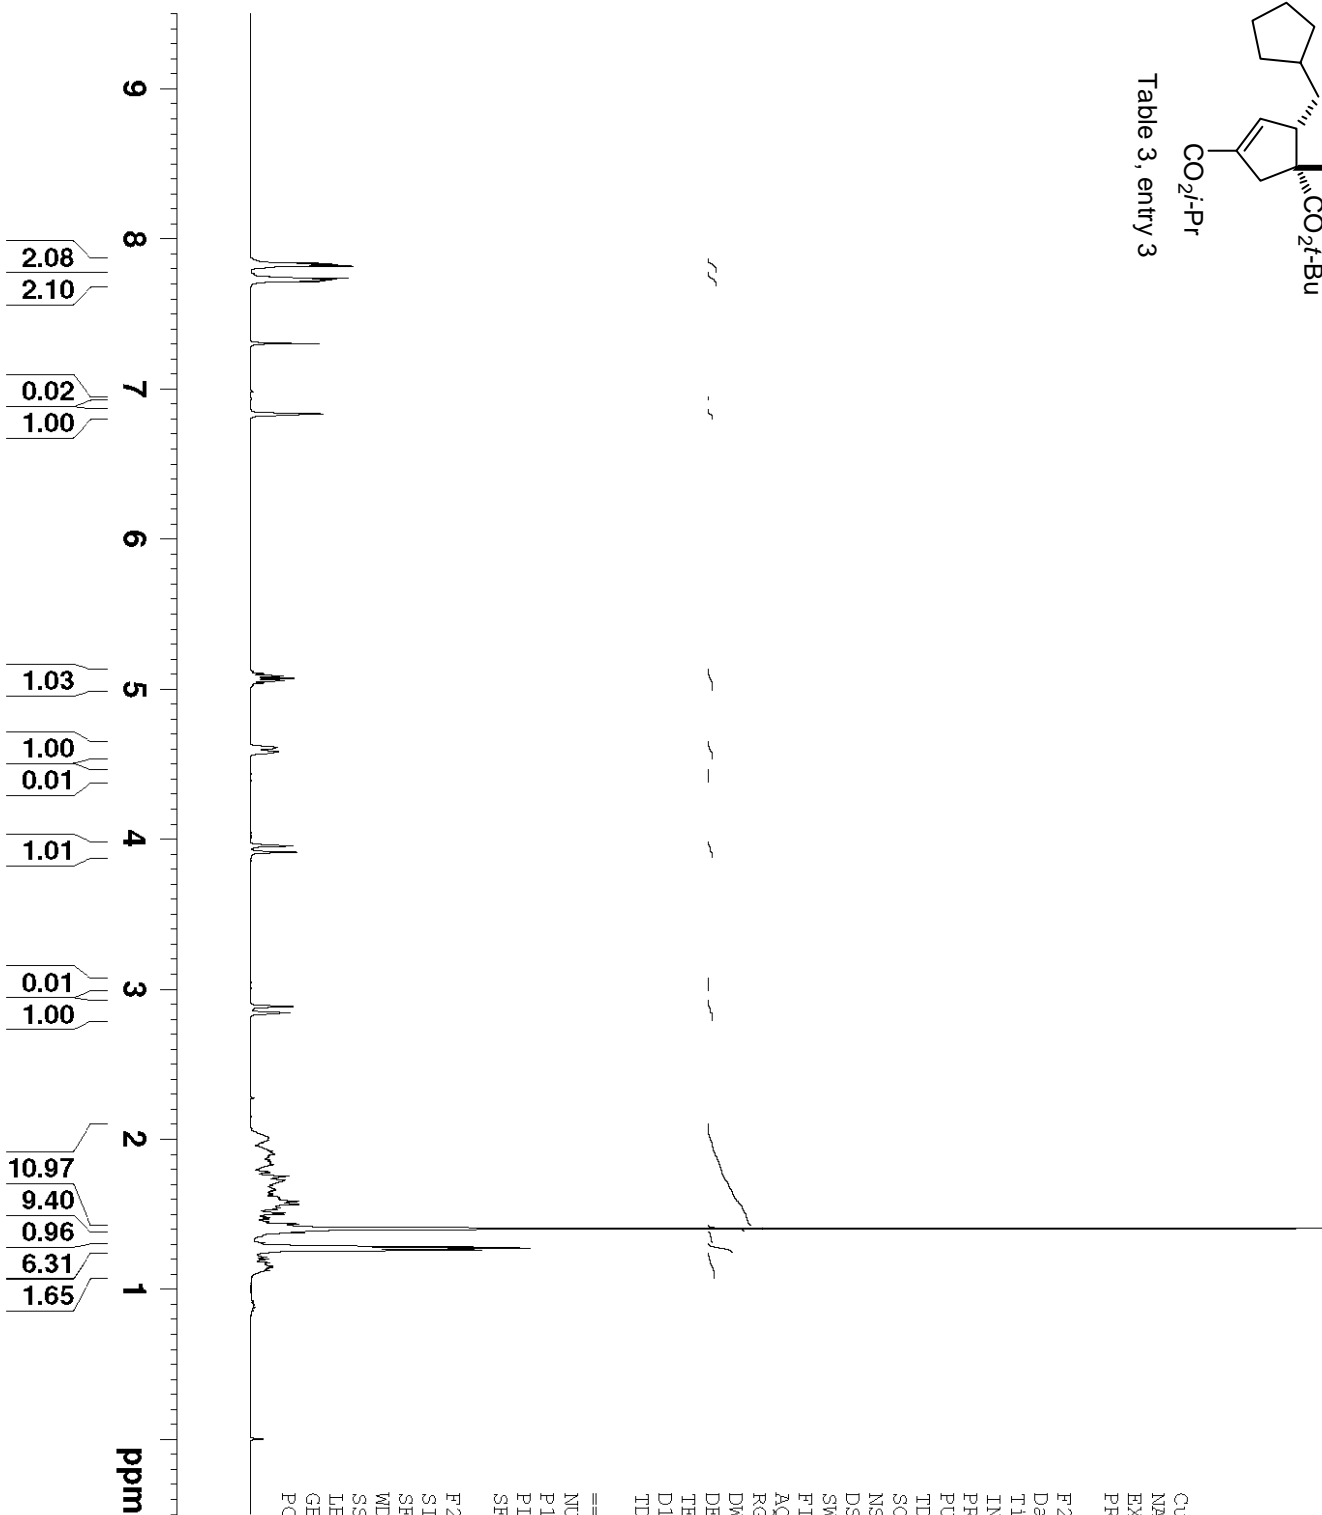

Current Data Parameters  
 NAME YF1056-2-C  
 EXPNO 1  
 PROCNO 1

F2 - Acquisition Parameters  
 Date\_ 20110218  
 Time 19.25  
 INSTRUM spect  
 PROBHD 5 mm BBO BB-1H  
 PULPROG zg30  
 TD 65536  
 SOLVENT  
 NS 4  
 DS 2  
 SWH 8278.146 Hz  
 FIDRES 0.126314 Hz  
 AQ 3.9584243 sec  
 RG 22.6  
 DW 60.400 usec  
 DE 6.00 usec  
 TE 295.2 K  
 D1 1.00000000 sec  
 TDO 1

==== CHANNEL f1 =====  
 NUC1 1H  
 P1 15.07 usec  
 PL1 0.00 dB  
 SFO1 400.1324710 MHz

F2 - Processing parameters  
 SI 65536  
 SF 400.1239919 MHz  
 WDW no  
 SSB 0  
 LB 0.00 Hz  
 GB 0  
 PC 1.00

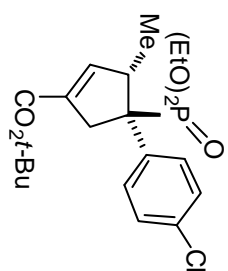

Table 4, entry 1

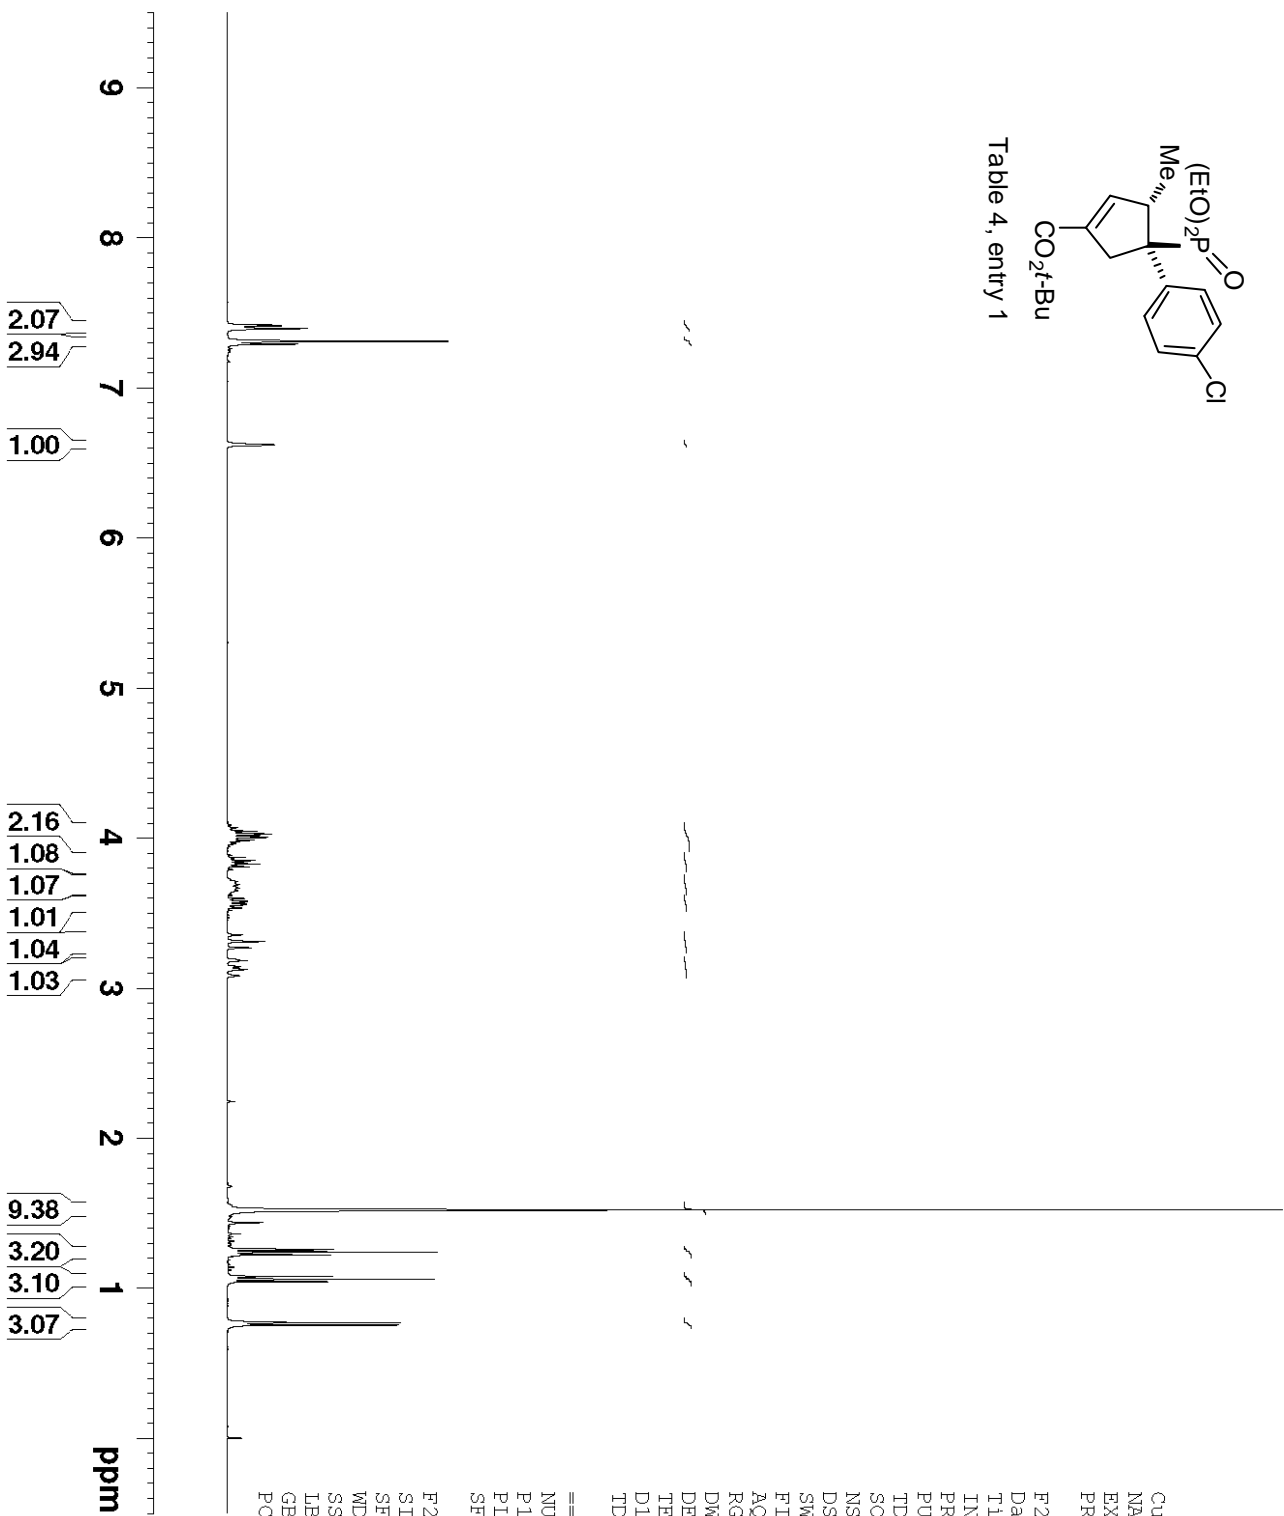

Current Data Parameters  
 NAME YF1064-2  
 EXPNO 1  
 PROCNO 1

F2 - Acquisition Parameters

Date\_ 20110214  
 Time 19.40  
 INSTRUM spect  
 PROBHD 5 mm BBO BB-1H  
 PULPROG zg30  
 TD 65536  
 SOLVENT

NS 4  
 DS 2  
 SWH 8278.146 Hz  
 FIDRES 0.126314 Hz  
 AQ 3.9584243 sec  
 RG 28.5

DW 60.400 usec  
 DE 6.00 usec  
 TE 296.2 K  
 D1 1.00000000 sec  
 TD0 1

===== CHANNEL f1 =====

NUC1 1H  
 P1 15.07 usec  
 PL1 0.00 dB  
 SFO1 400.1324710 MHz

F2 - Processing parameters

SI 65536  
 SF 400.1299892 MHz  
 WDW no  
 SSB 0  
 LB 0.00 Hz  
 GB 0  
 PC 1.00

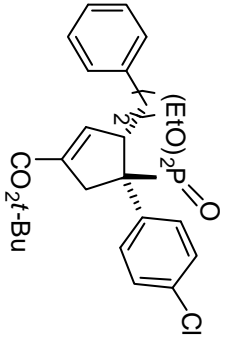

Table 4, entry 2

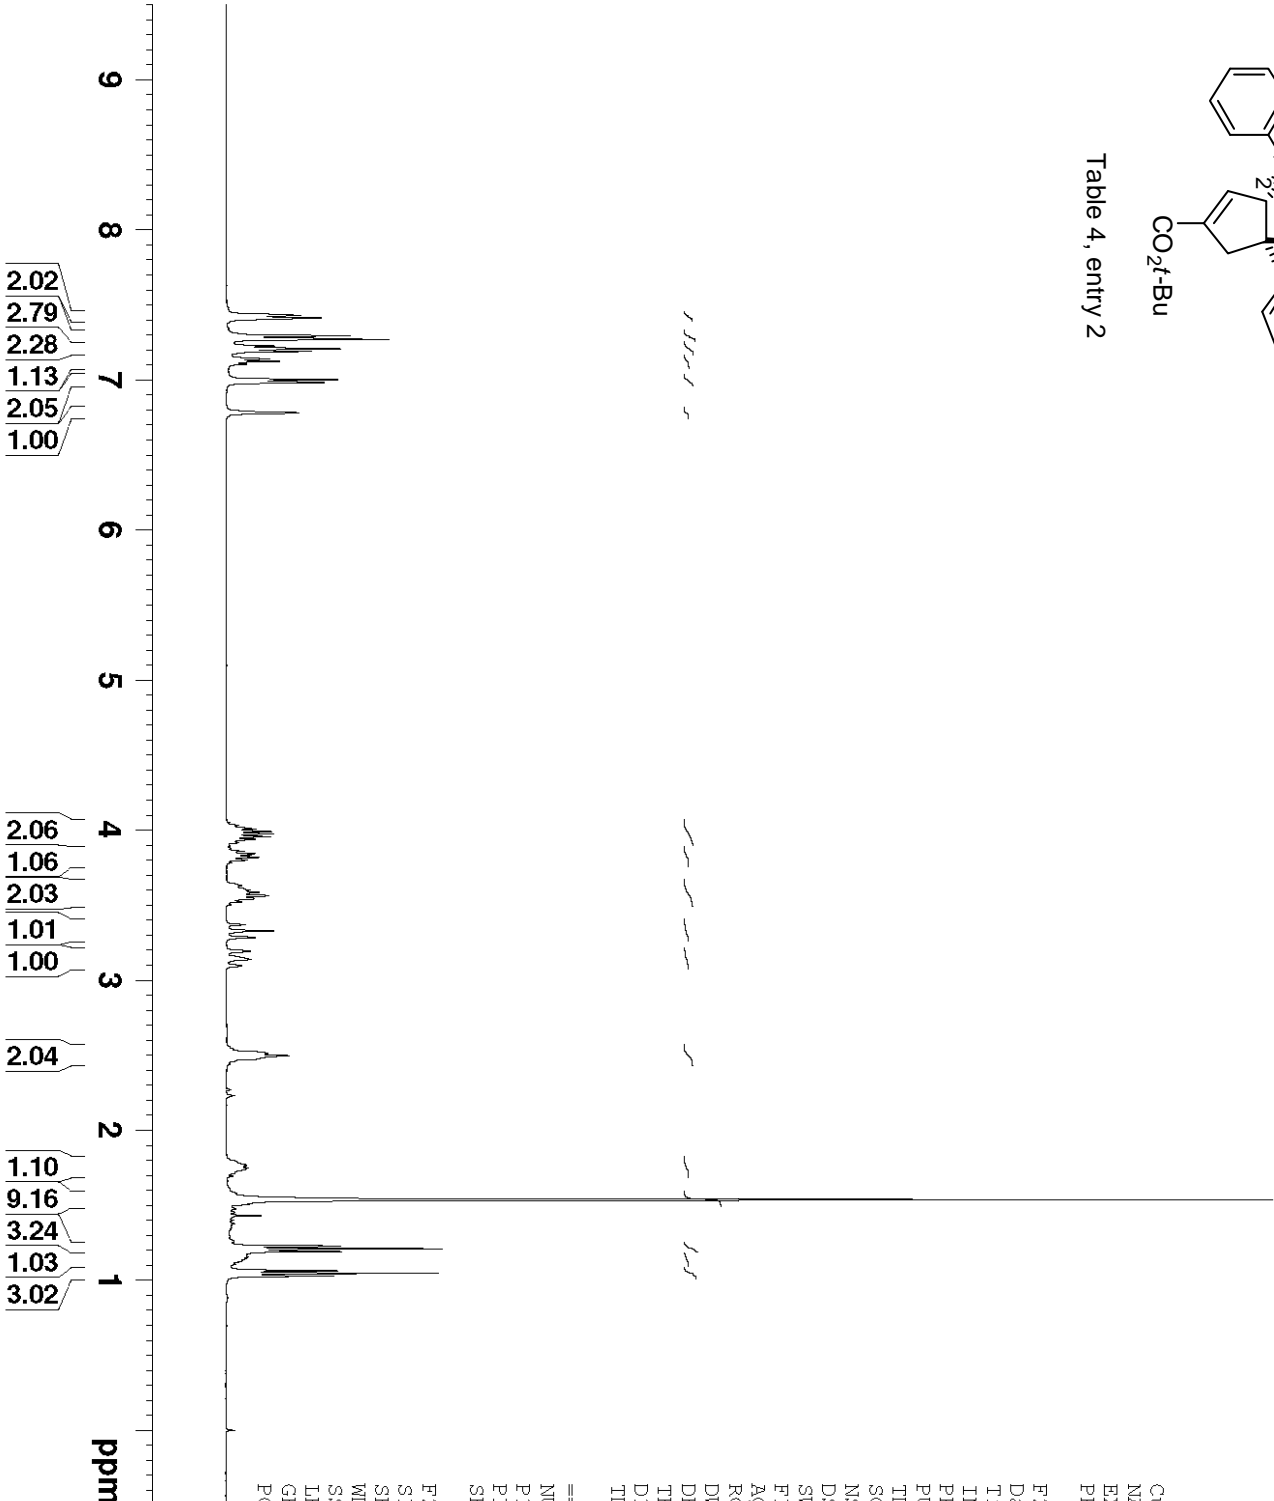

Current Data Parameters  
 NAME YF1066-1  
 EXPNO 1  
 PROCNO 1

F2 - Acquisition Parameters  
 Date\_ 20110207  
 Time 19.08  
 INSTRUM spect  
 PROBHD BB-1H  
 PULPROG zg30  
 TD 65536  
 SOLVENT  
 NS 4  
 DS 2  
 SWH 8278.146 Hz  
 FIDRES 0.126314 Hz  
 AQ 3.9584243 sec  
 RG 20.2  
 DW 60.400 usec  
 DE 6.00 usec  
 TE 296.2 K  
 D1 1.00000000 sec  
 TD0 1

==== CHANNEL F1 =====  
 NUC1 1H  
 P1 15.07 usec  
 PL1 0.00 dB  
 SFO1 400.1324710 MHz

F2 - Processing parameters  
 SI 65536  
 SF 400.1300060 MHz  
 WDW no  
 SSB 0  
 LB 0.00 Hz  
 GB 0  
 PC 1.00



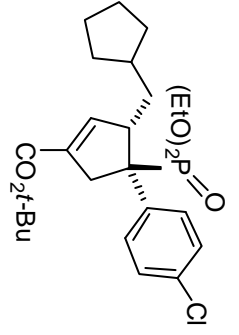

Table 4, entry 3

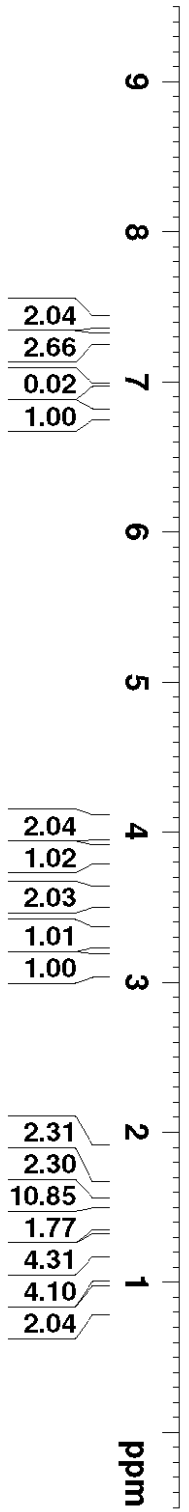

```

Current Data Parameters
NAME          YF1065-1
EXPNO        1
PROCNO       1

F2 - Acquisition Parameters
Date_        20110205
Time        17.40
INSTRUM     spect
PROBHD      5 mm BBO BB-1H
PULPROG     zg30
TD          65536
SOLVENT     CDCl3
NS          4
DS          2
SWH         8278.146 Hz
FIDRES     0.126314 Hz
AQ         3.9584243 sec
RG         25.4
DW         60.400 usec
DE         6.00 usec
TE         296.2 K
D1         1.00000000 sec
TD0        1

===== CHANNEL f1 =====
NUC1        1H
P1         15.07 usec
PL1        0.00 dB
SFO1       400.1324710 MHz

F2 - Processing parameters
SI         65536
SF         400.1299928 MHz
WDW        no
SSB        0
LB         0.00 Hz
GB         0
PC         1.00
  
```

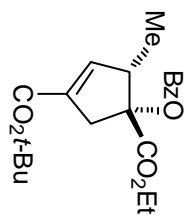

Table 5, entry 1

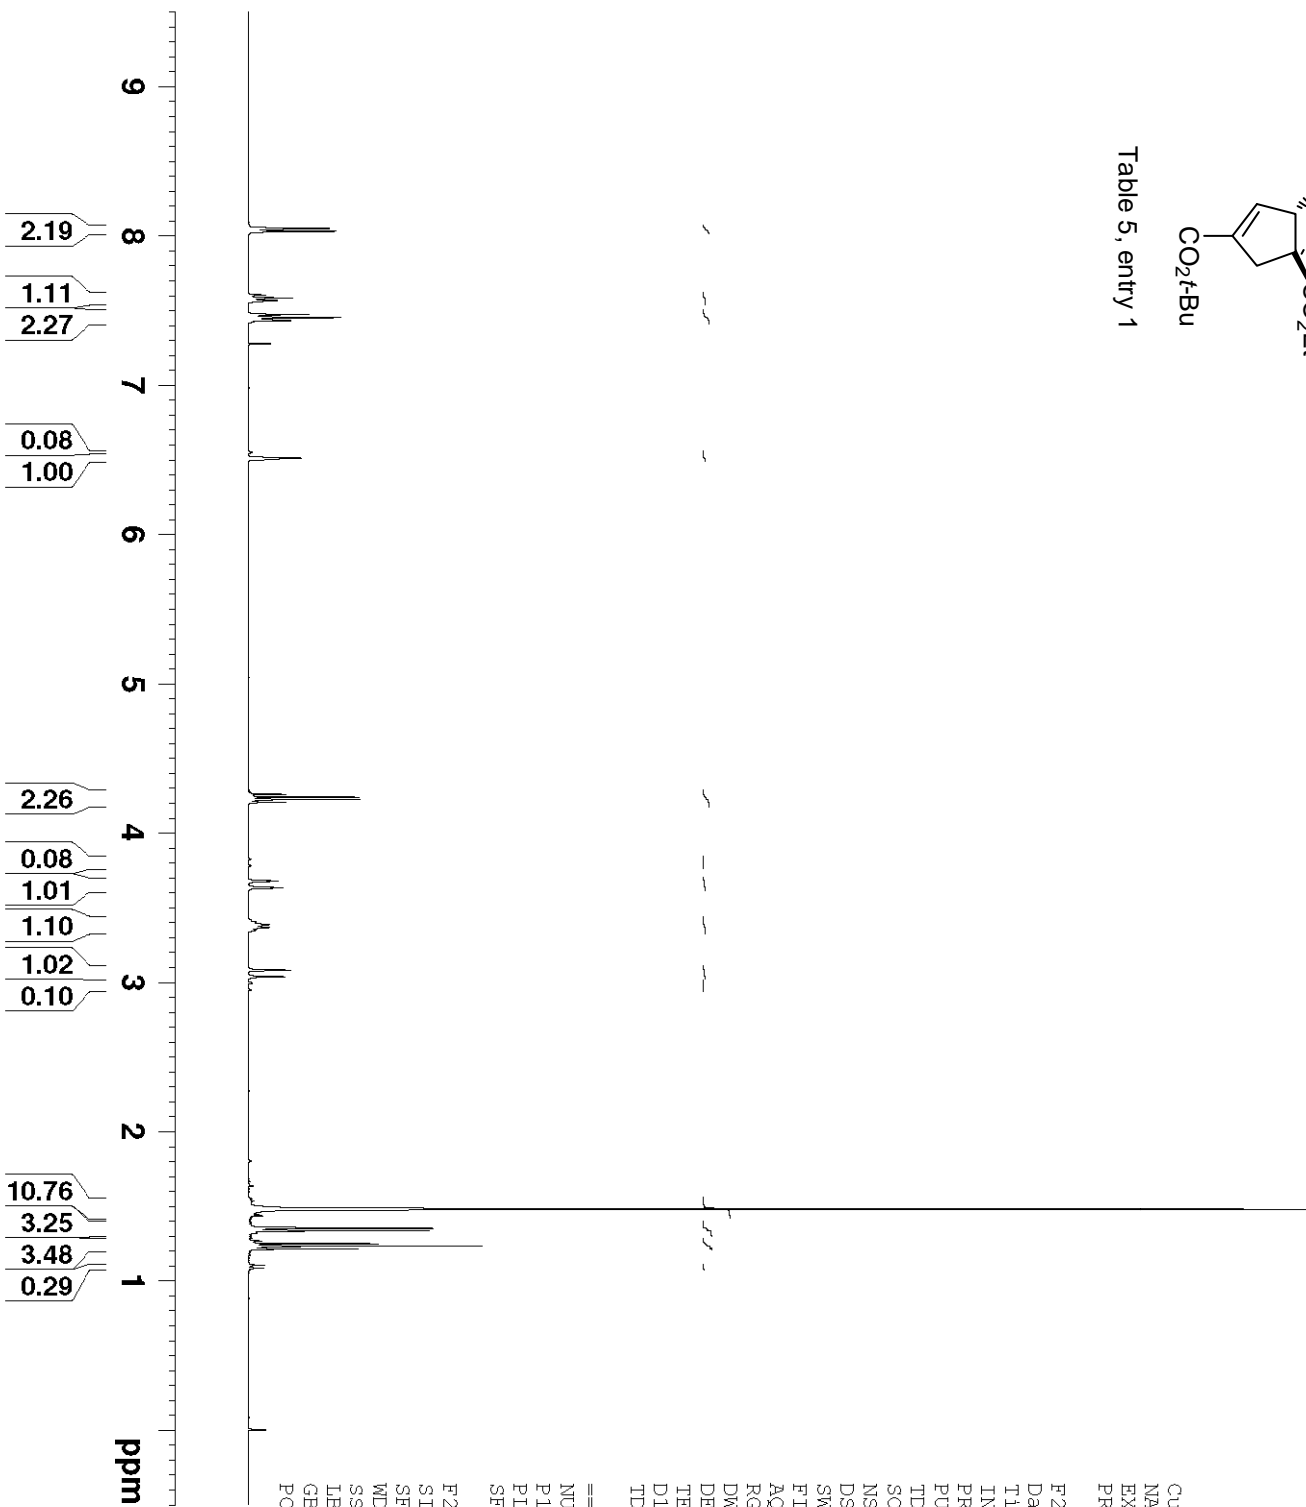

Current Data Parameters  
 NAME YF1058-1  
 EXPNO 1  
 PROCNO 1

F2 - Acquisition Parameters

Date\_ 20110203  
 Time 19.05  
 INSTRUM spect  
 PROBHD 5 mm BBO BB-1H  
 PULPROG zg30  
 TD 65536  
 SOLVENT  
 NS 4  
 DS 2  
 SWH 8278.146 Hz  
 FIDRES 0.126314 Hz  
 AQ 3.9584243 sec  
 RG 32  
 DE 60.400 usec  
 TE 296.2 K  
 D1 1.00000000 sec  
 TD0 1

===== CHANNEL f1 =====  
 NUCL1 1H  
 P1 15.07 usec  
 PL1 0.00 dB  
 SFO1 400.1324710 MHz

F2 - Processing parameters

SI 65536  
 SF 400.1300021 MHz  
 WDM no  
 SSB 0  
 LB 0.00 Hz  
 GB 0  
 PC 1.00

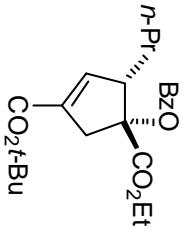

Table 5, entry 2

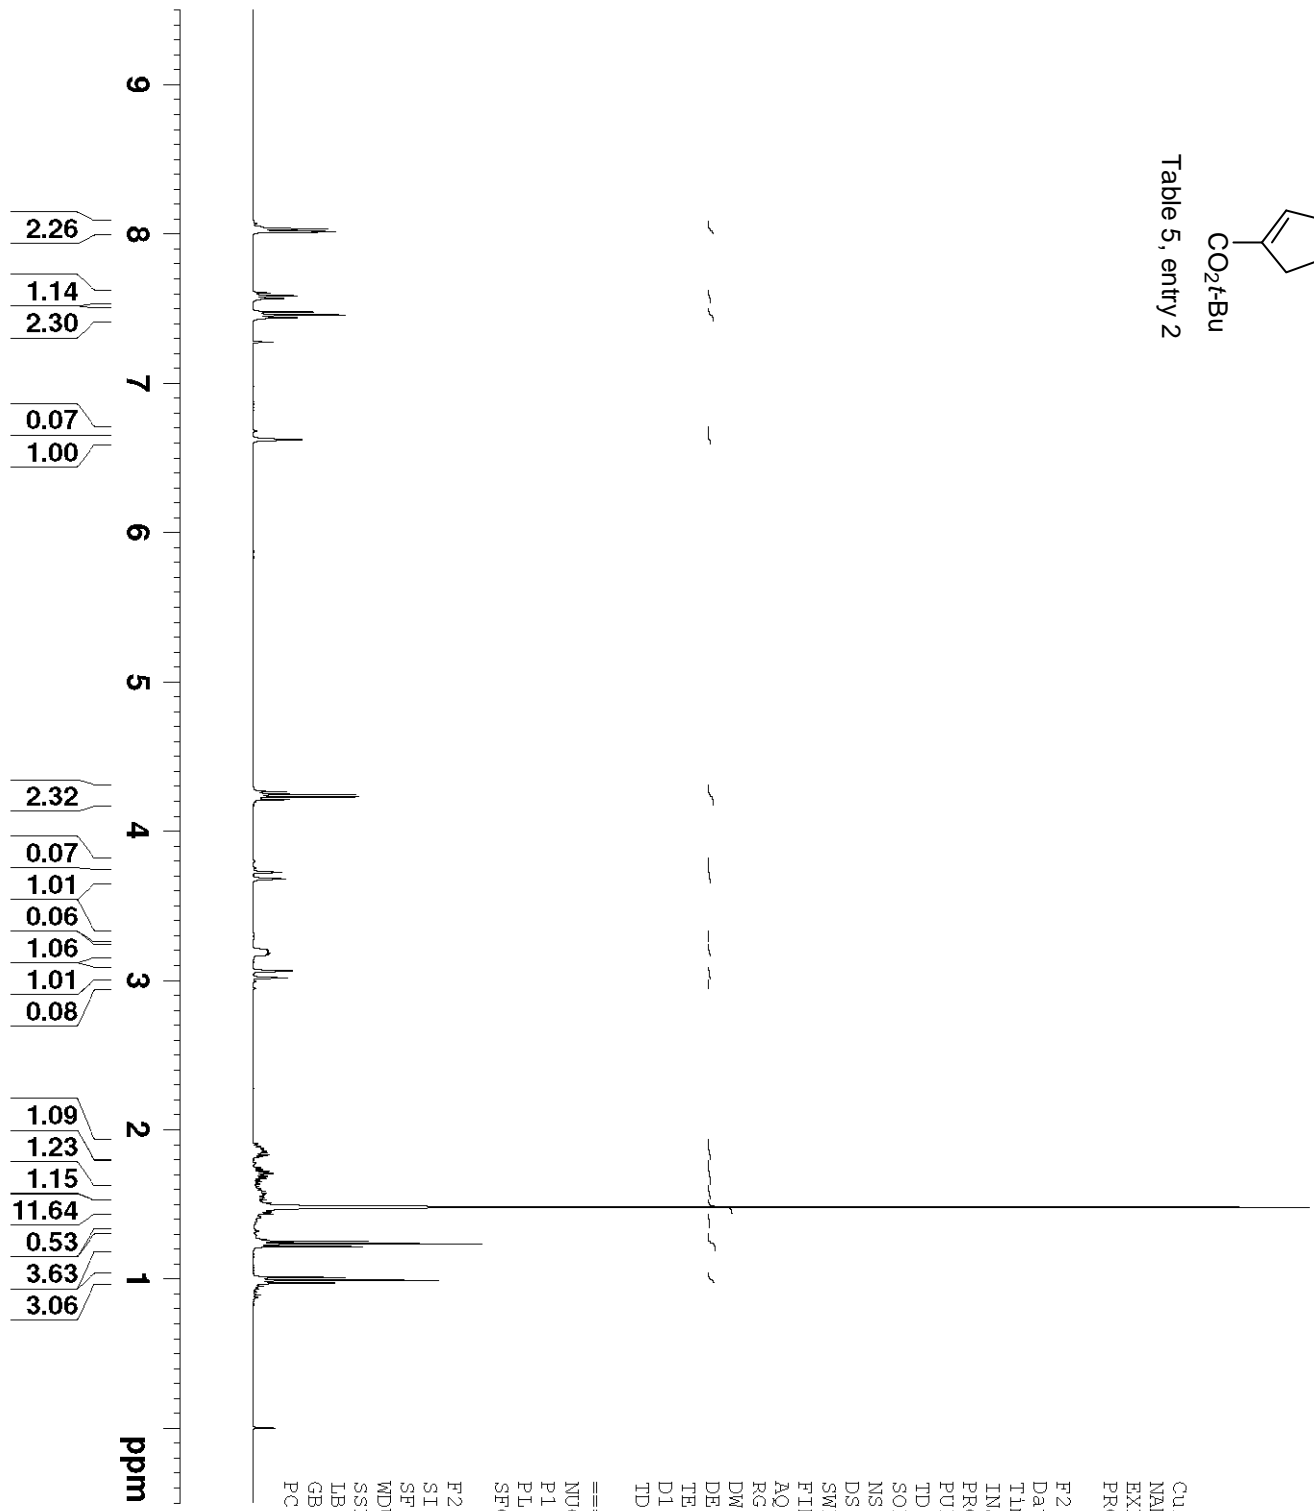

Current Data Parameters  
 NAME YF1059-1  
 EXPNO 1  
 PROCNO 1

F2 - Acquisition Parameters  
 Date\_ 20110203  
 Time 19.13  
 INSTRUM spect  
 PROBHD 5 mm BBO BB-1H  
 PULPROG zg30  
 TD 65536  
 SOLVENT  
 NS 4  
 DS 2  
 SWH 8278.146 Hz  
 FIDRES 0.126314 Hz  
 AQ 3.9584243 sec  
 RG 28.5  
 DE 60.400 usec  
 TE 296.2 K  
 D1 1.00000000 sec  
 TD0 1

==== CHANNEL F1 =====  
 NUC1 1H  
 P1 15.07 usec  
 PL1 0.00 dB  
 SFO1 400.1324710 MHz

F2 - Processing parameters  
 SI 65536  
 SF 400.1300032 MHz  
 WDW no  
 SSB 0  
 LB 0.00 Hz  
 GB 0  
 PC 1.40

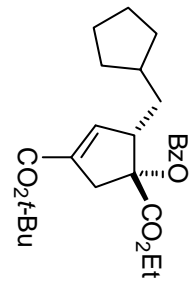

Table 5, entry 3

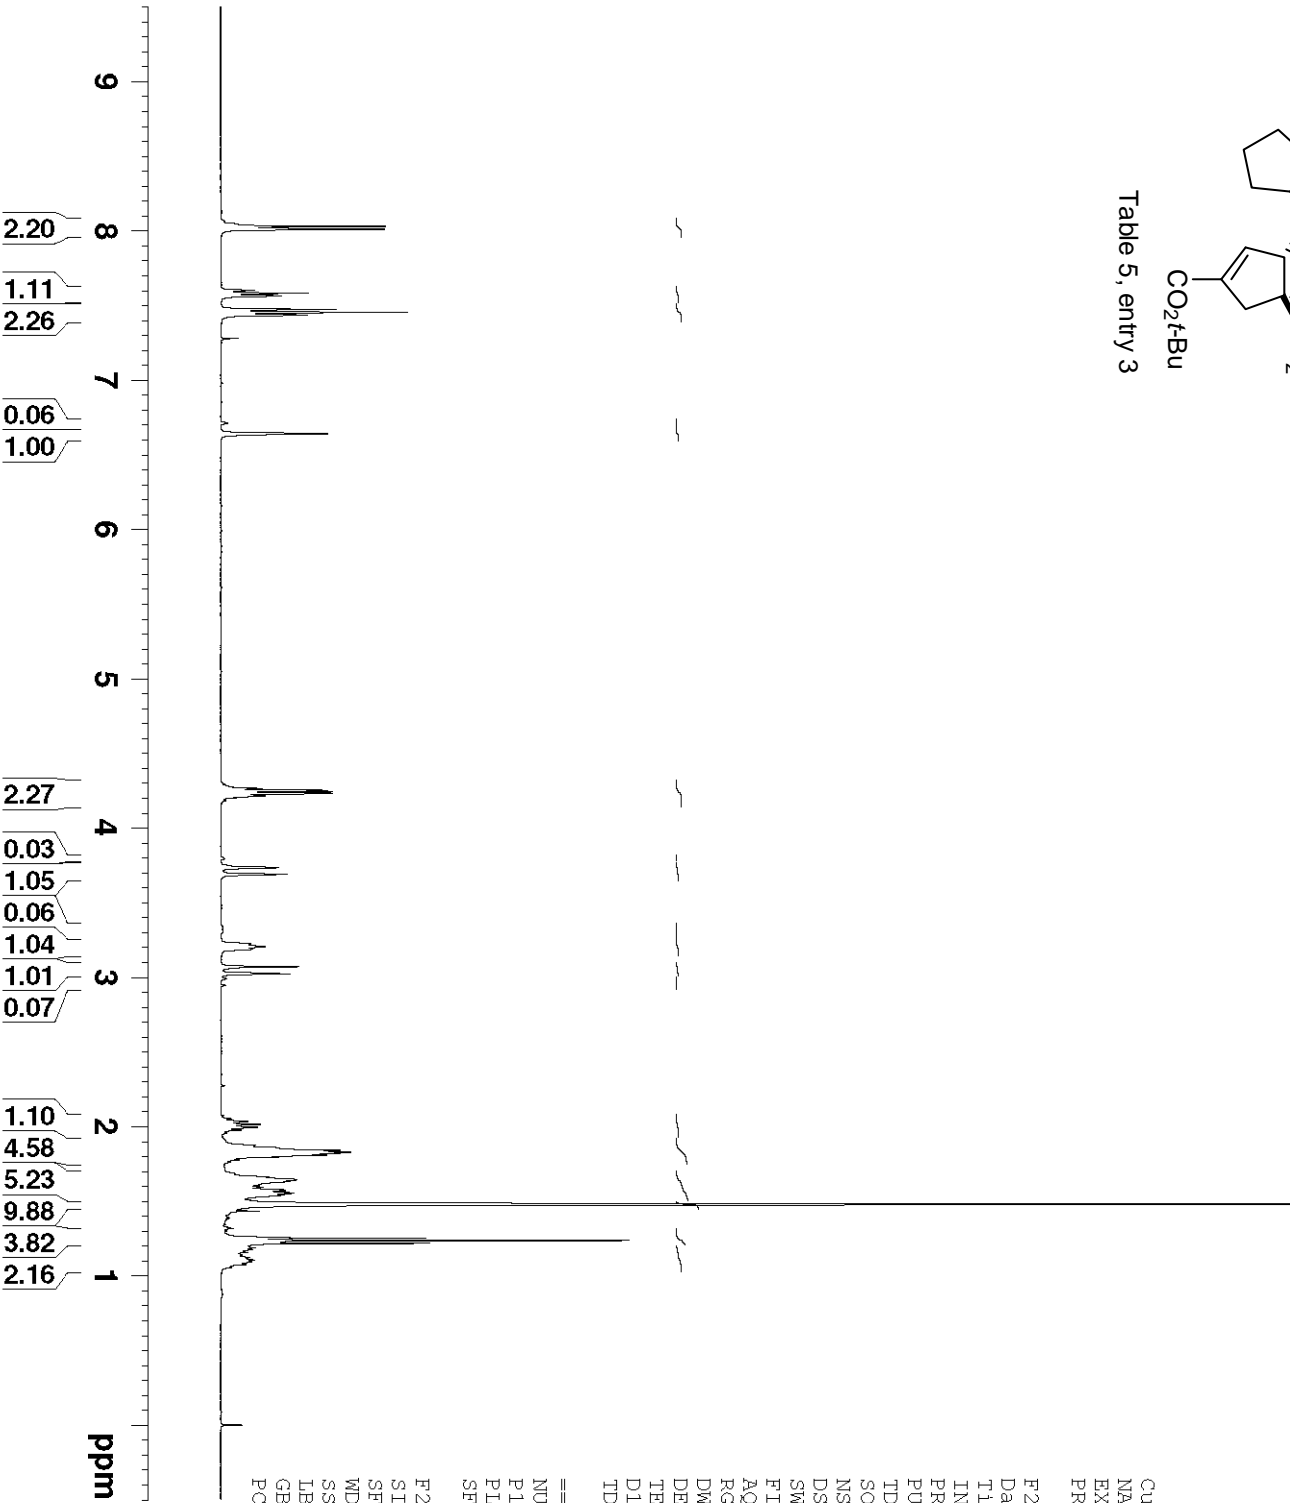

Current Data Parameters  
 NAME YF1120-1  
 EXPNO 1  
 PROCNO 1

F2 - Acquisition Parameters  
 Date\_ 20110304  
 Time 20.13  
 INSTRUM spect  
 PROBHD 5 mm BBO BB-1H  
 PULPROG zg30  
 TD 65536  
 SOLVENT CDCl<sub>3</sub>  
 NS 4  
 DS 2  
 SWH 8278.146 Hz  
 FIDRES 0.126314 Hz  
 AQ 3.9584243 sec  
 RG 25.4  
 DE 60.400 usec  
 TE 294.2 K  
 D1 1.00000000 sec  
 TD0 1

==== CHANNEL F1 =====  
 NUC1 1H  
 P1 15.07 usec  
 PL1 0.00 dB  
 SF01 400.1324710 MHz

F2 - Processing parameters  
 SI 65536  
 SF 400.1300019 MHz  
 MDW no  
 SSB 0  
 LB 0.00 Hz  
 GB 0  
 PC 1.00

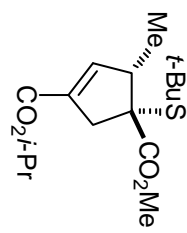

Table 6, entry 1

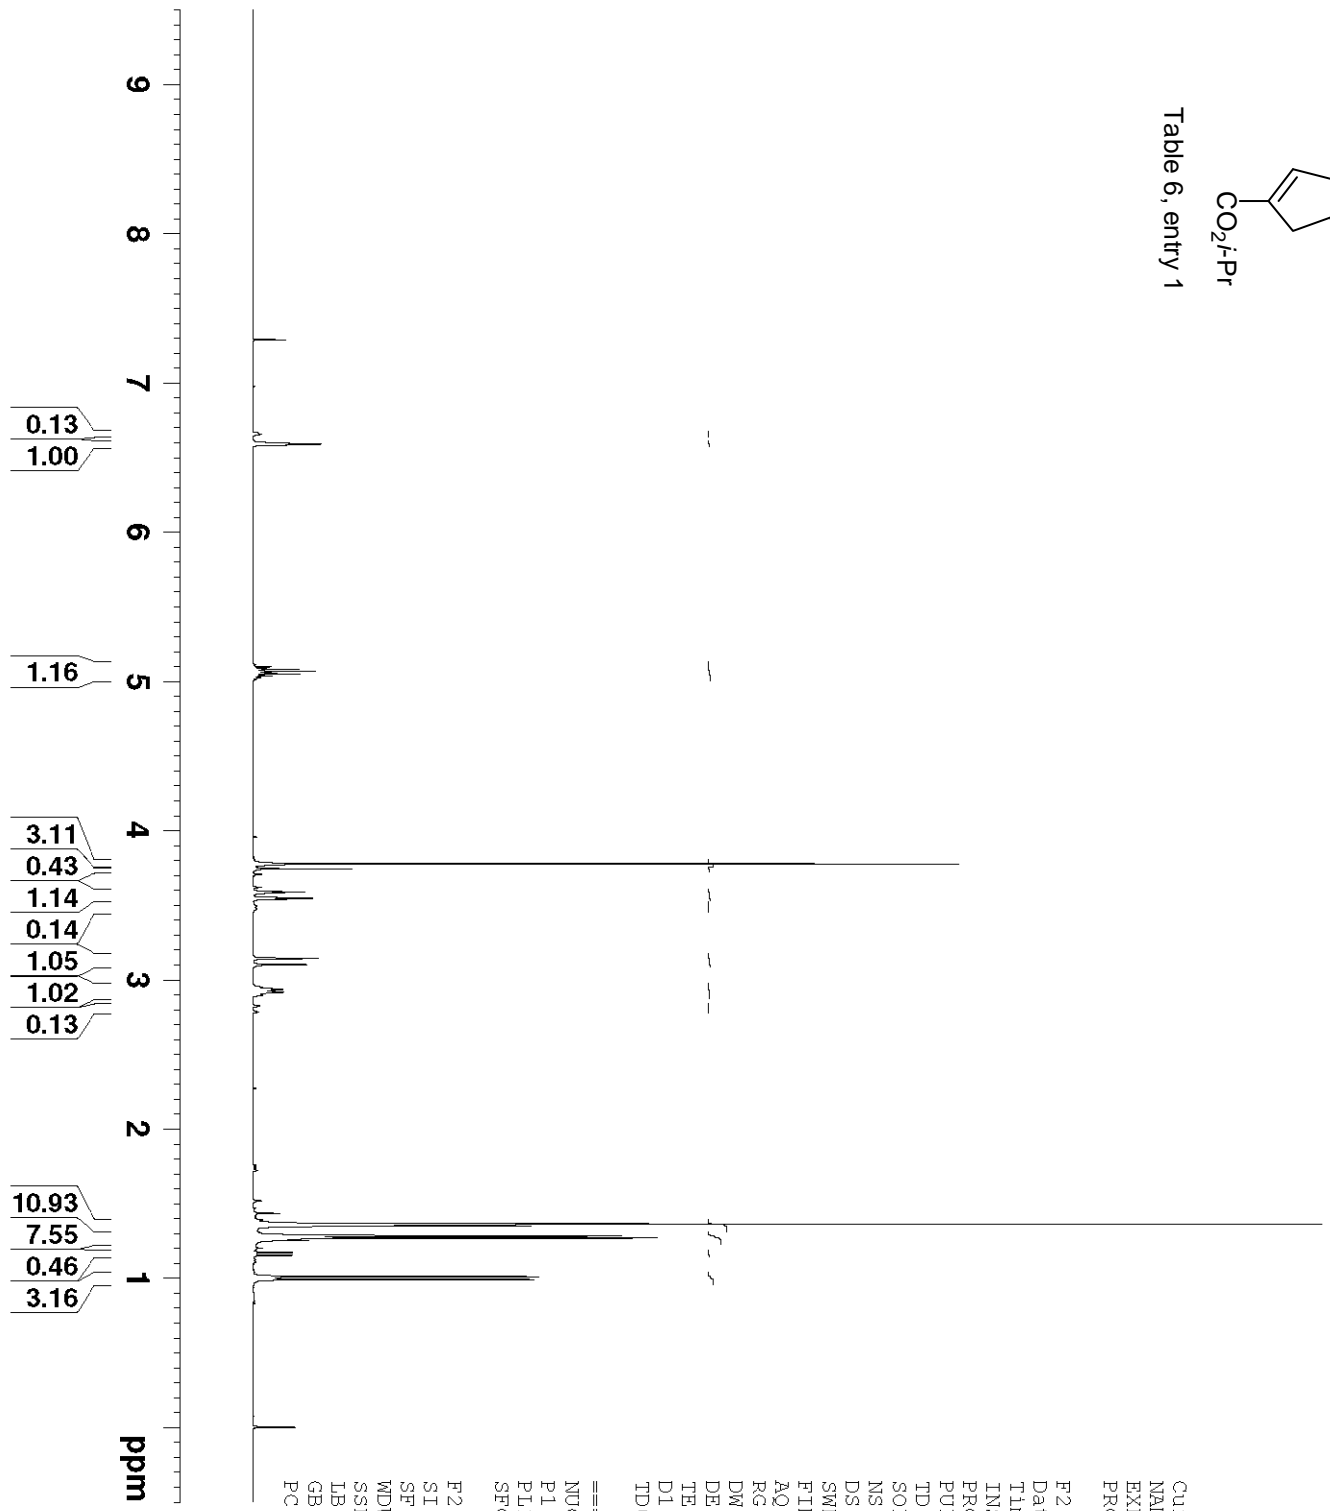

Current Data Parameters  
 NAME YF1095-1  
 EXPNO 1  
 PROCNO 1

F2 - Acquisition Parameters  
 Date\_ 20110301  
 Time 20.24  
 INSTRUM spect  
 PROBHD 5 mm BBO BB-1H  
 PULPROG zg30  
 TD 65536  
 SOLVENT  
 NS 8  
 DS 2  
 SMH 8278.146 Hz  
 FIDRES 0.126314 Hz  
 AQ 3.9584243 sec  
 RG 10.3  
 DW 60.400 usec  
 DE 6.00 usec  
 TE 300.0 K  
 D1 1.00000000 sec  
 TD0 1

==== CHANNEL F1 =====  
 NUC1 1H  
 P1 15.07 usec  
 PL1 0.00 dB  
 SF01 400.1324710 MHz

F2 - Processing parameters  
 SI 65536  
 SF 400.1299974 MHz  
 WDW no  
 SSB 0  
 LB 0.00 Hz  
 GB 0  
 PC 1.40

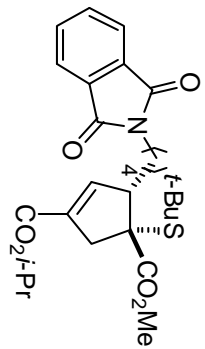

Table 6, entry 2

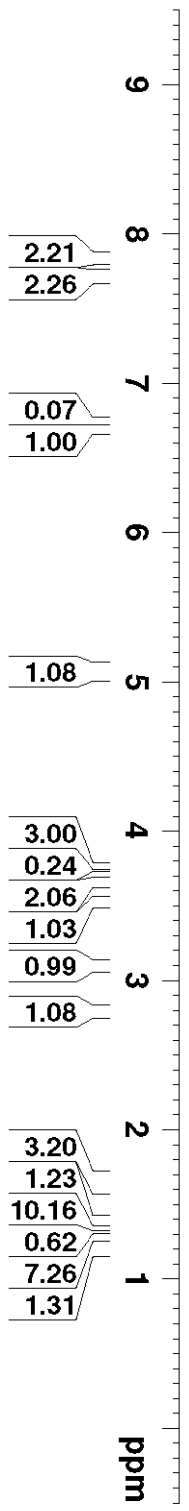

```

Current Data Parameters
NAME          YF1103-1
EXPNO         1
PROCNO        1

F2 - Acquisition Parameters
Date_         20110223
Time          21.05
INSTRUM      spect
PROBHD       5 mm BBO BB-1H
PULPROG      zg30
TD            65536
SOLVENT
NS            4
DS            2
SWH           8278.146 Hz
FIDRES       0.126314 Hz
AQ            3.9584243 sec
RG            32
DE            60.400 usec
TE            296.2 K
D1            1.00000000 sec
TD0           1

===== CHANNEL f1 =====
NUC1          1H
P1            15.07 usec
PL1           0.00 dB
SFO1          400.1324710 MHz

F2 - Processing parameters
SI            65536
SF            400.1299891 MHz
WDW           no
SSB           0
LB            0.00 Hz
GB            0
PC            1.00
  
```

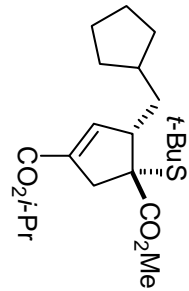

Table 6, entry 3

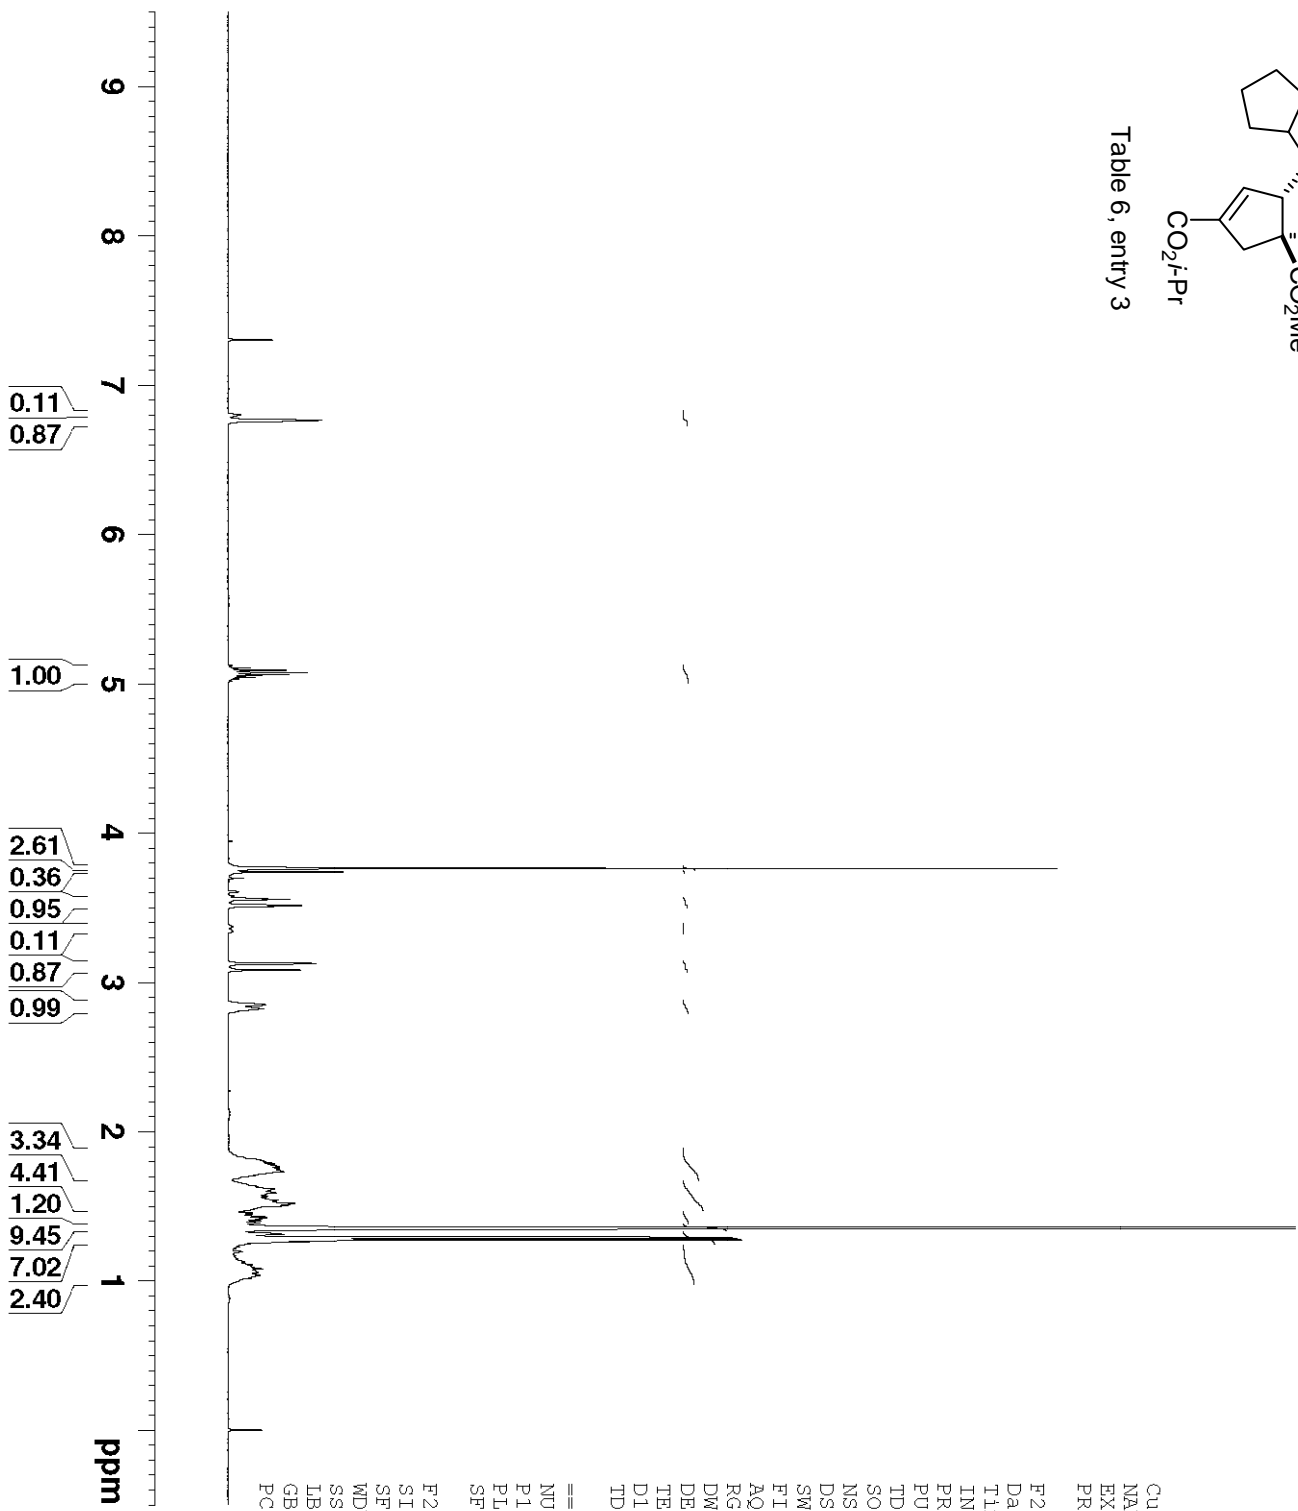

Current Data Parameters  
 NAME YF1118-1  
 EXPNO 1  
 PROCNO 1

F2 - Acquisition Parameters

Date\_ 20110303  
 Time 18.57  
 INSTRUM spect  
 PROBHD 5 mm BBO BB-1H  
 PULPROG zg30  
 TD 65536  
 SOLVENT CDCl3  
 NS 4  
 DS 2  
 SWH 8278.146 Hz  
 FIDRES 0.126314 Hz  
 AQ 3.9584243 sec  
 RG 25.4  
 DW 60.400 usec  
 DE 6.00 usec  
 TE 296.2 K  
 D1 1.00000000 sec  
 TD0 1

==== CHANNEL F1 =====

NUC1 1H  
 P1 15.07 usec  
 PL1 0.00 dB  
 SFO1 400.1324710 MHz

F2 - Processing parameters

SI 65536  
 SF 400.1299913 MHz  
 WDW no  
 SSB 0  
 LB 0.00 Hz  
 GB 0  
 PC 1.00

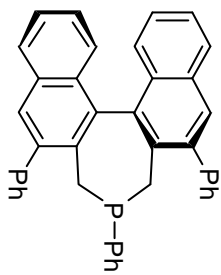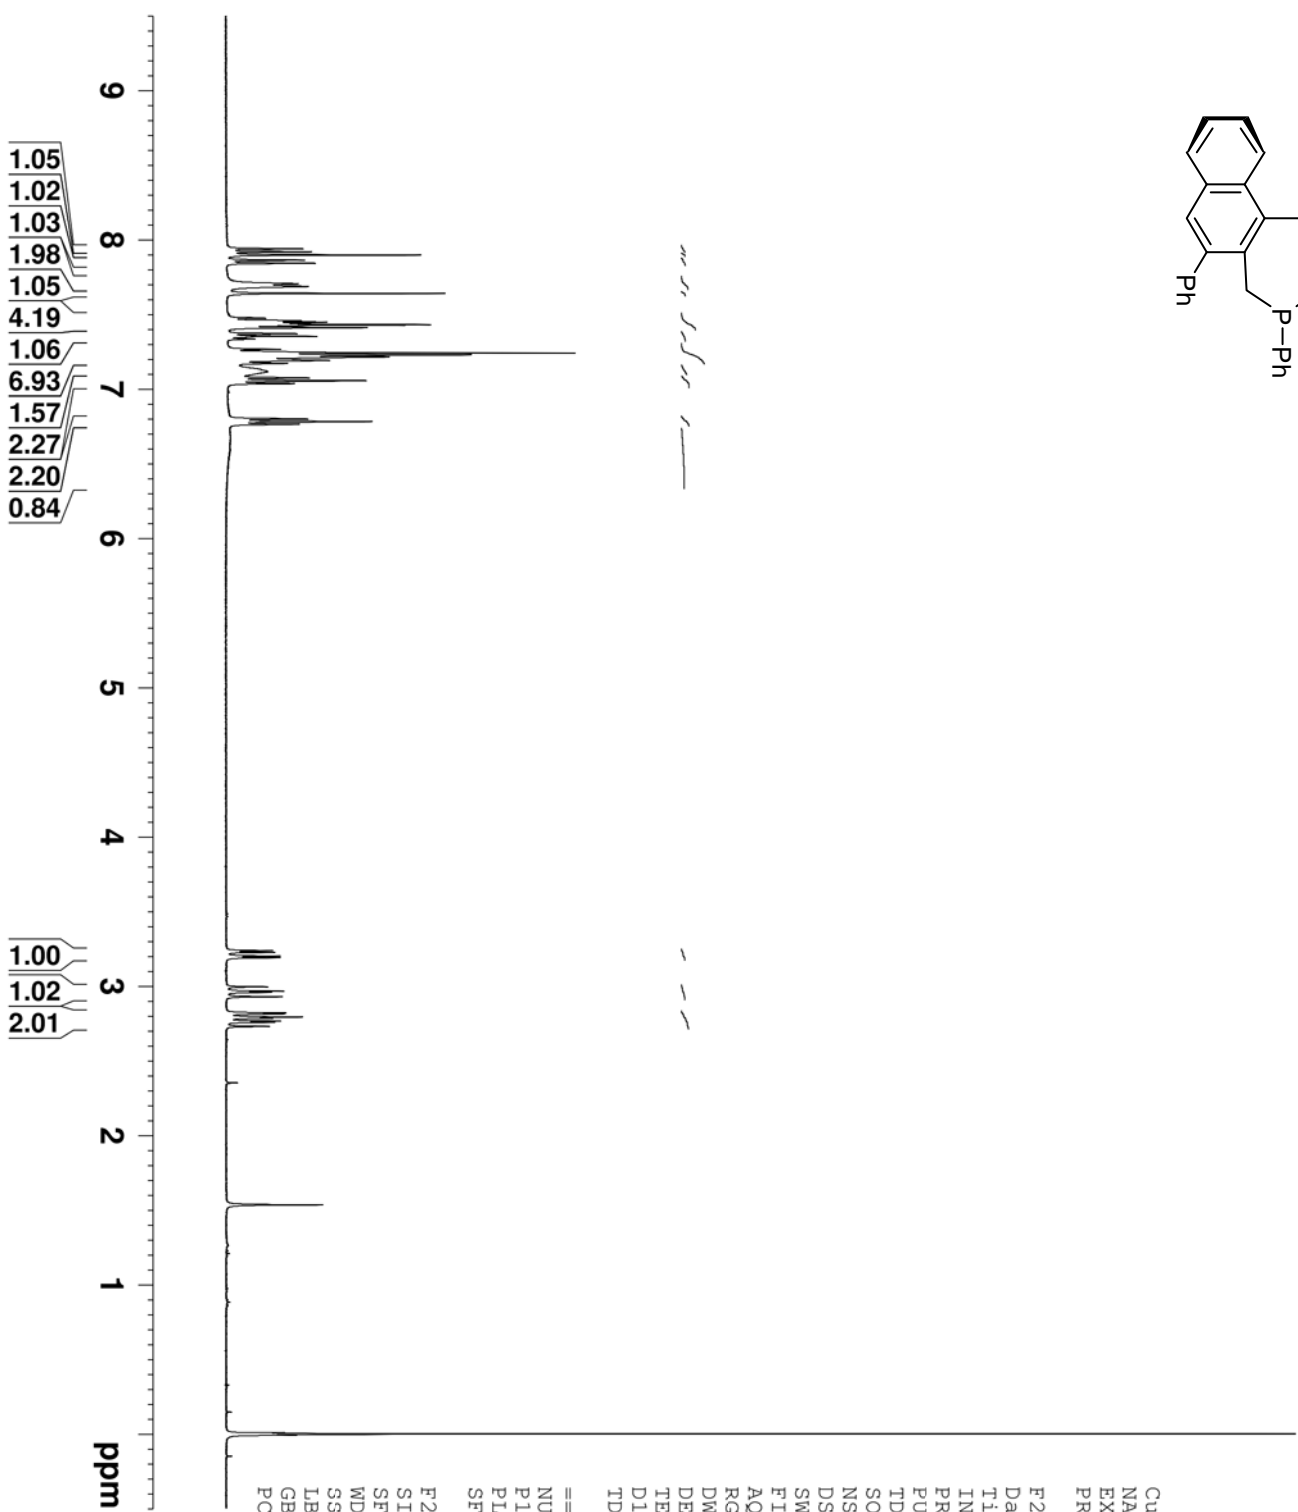

Current Data Parameters  
 NAME YF0500  
 EXPNO 103  
 PROCNO 1

F2 - Acquisition Parameters  
 Date\_ 20100619  
 Time 13.29

INSTRUM spect  
 PROBHD 5 mm QNP 1H/13  
 PULPROG zg30  
 TD 65536  
 SOLVENT CDCl3  
 NS 16  
 DS 2

SWH 8278.146 Hz  
 FIDRES 0.126314 Hz  
 AQ 3.9584243 sec  
 RG 256  
 DW 60.400 usec  
 DE 6.00 usec  
 TE 294.2 K  
 D1 1.00000000 sec  
 TD0 1

==== CHANNEL f1 =====  
 NUC1 1H  
 P1 14.00 usec  
 PL1 0.00 dB  
 SFO1 400.1324710 MHz

F2 - Processing parameters  
 SI 65536  
 SF 400.1300168 MHz  
 WDW no  
 SSB 0  
 LB 0.00 Hz  
 GB 0  
 PC 1.00



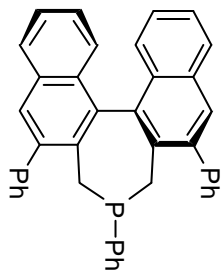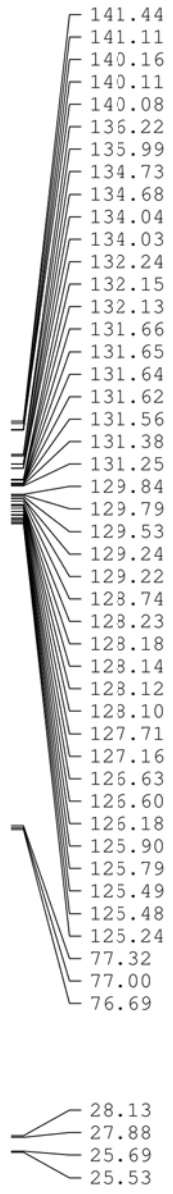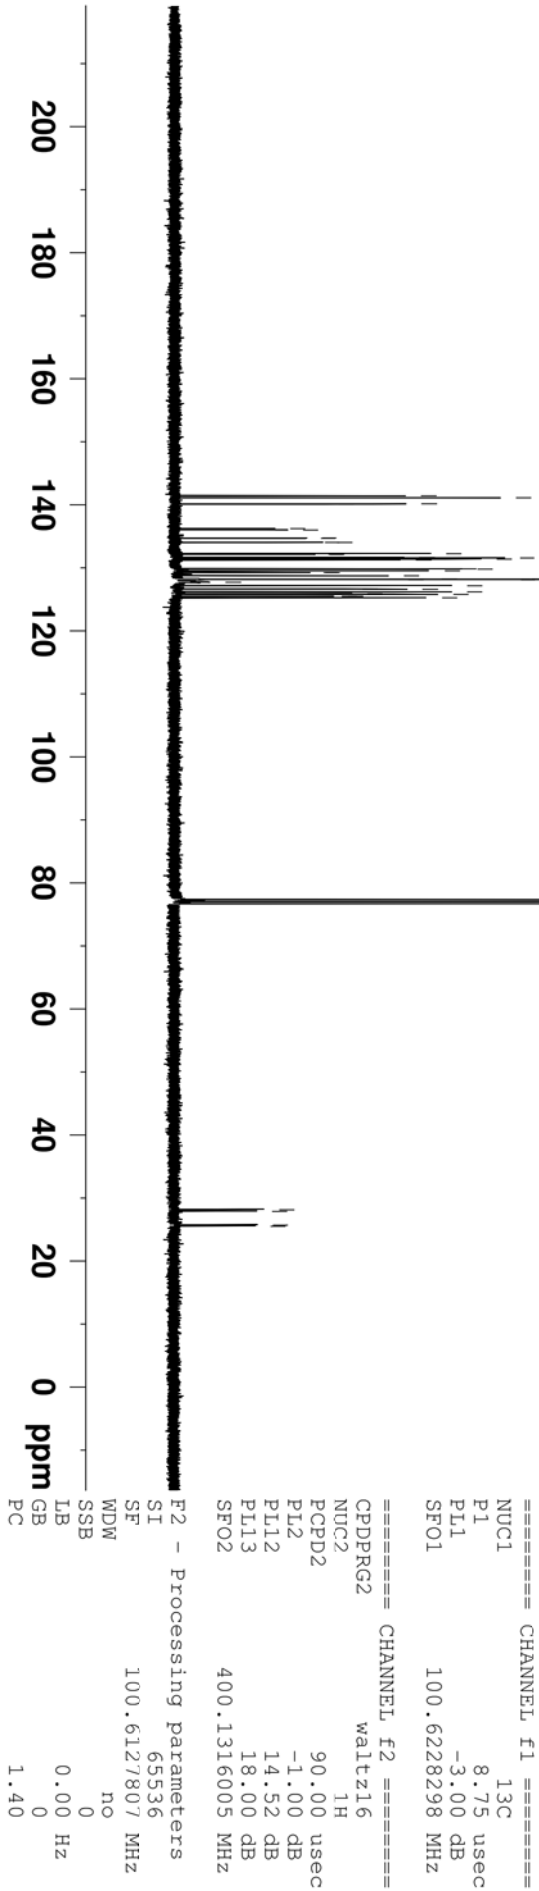

Current Data Parameters  
 NAME YF0500  
 EXPNO 12  
 PROCNO 1

F2 - Acquisition Parameters  
 Date\_ 20100611  
 Time 20.33

INSTRUM spect  
 PROBHD BB-1H  
 PULPROG zgpg30  
 TD 65536  
 SOLVENT CDCl3  
 NS 960  
 DS 2  
 SWH 23980.814 Hz  
 FIDRES 0.365918 Hz  
 AQ 1.3664756 sec  
 RG 8192  
 DW 20.850 usec  
 DE 6.00 usec  
 TE 295.2 K  
 D1 2.00000000 sec  
 d11 0.03000000 sec  
 DELTA 1.89999998 sec  
 TD0 1

==== CHANNEL f1 =====  
 NUC1 13C  
 P1 8.75 usec  
 PL1 -3.00 dB  
 SFO1 100.6228298 MHz

==== CHANNEL f2 =====  
 CPDPRG2 waltz16  
 NUC2 1H  
 PCPD2 90.00 usec  
 PL2 -1.00 dB  
 PL12 14.52 dB  
 PL13 18.00 dB  
 SFO2 400.1316005 MHz

F2 - Processing parameters  
 SI 65536  
 SF 100.6127807 MHz  
 MDW no  
 SSB 0  
 LB 0.00 Hz  
 GB 0  
 PC 1.40

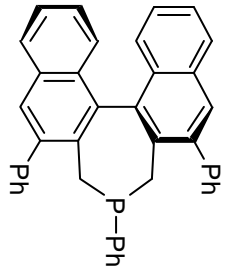

5.162

Current Data Parameters  
 NAME YF0500  
 EXPNO 101  
 PROCNO 1

F2 - Acquisition Parameters  
 Date\_ 20100619  
 Time 13.20  
 INSTRUM spect  
 PROBHD 5 mm QNP 1H/13  
 PULPROG zgpg30  
 TD 65536  
 SOLVENT CDCl3  
 NS 4  
 DS 4  
 SWH 64935.066 Hz  
 FIDRES 0.990830 Hz  
 AQ 0.5046772 sec  
 RG 22800  
 DW 7.700 usec  
 DE 6.00 usec  
 TE 294.2 K  
 D1 2.00000000 sec  
 d11 0.03000000 sec  
 DELTA 1.89999998 sec  
 TD0 1

==== CHANNEL f1 =====  
 NUC1 31P  
 P1 9.25 usec  
 PL1 3.00 dB  
 SF01 161.9674940 MHz

==== CHANNEL f2 =====  
 CPDPRG2 waltz16  
 NUC2 1H  
 PCPD2 90.00 usec  
 PL2 0.00 dB  
 PL12 16.10 dB  
 PL13 19.00 dB  
 SF02 400.1316000 MHz

F2 - Processing parameters  
 SI 65536  
 SF 161.9755004 MHz  
 WDW no  
 SSB 0  
 LB 0.00 Hz  
 GB 0  
 PC 1.40

100 50 0 -50 -100 -150 -200 ppm

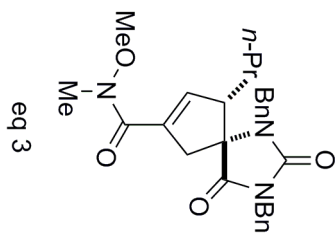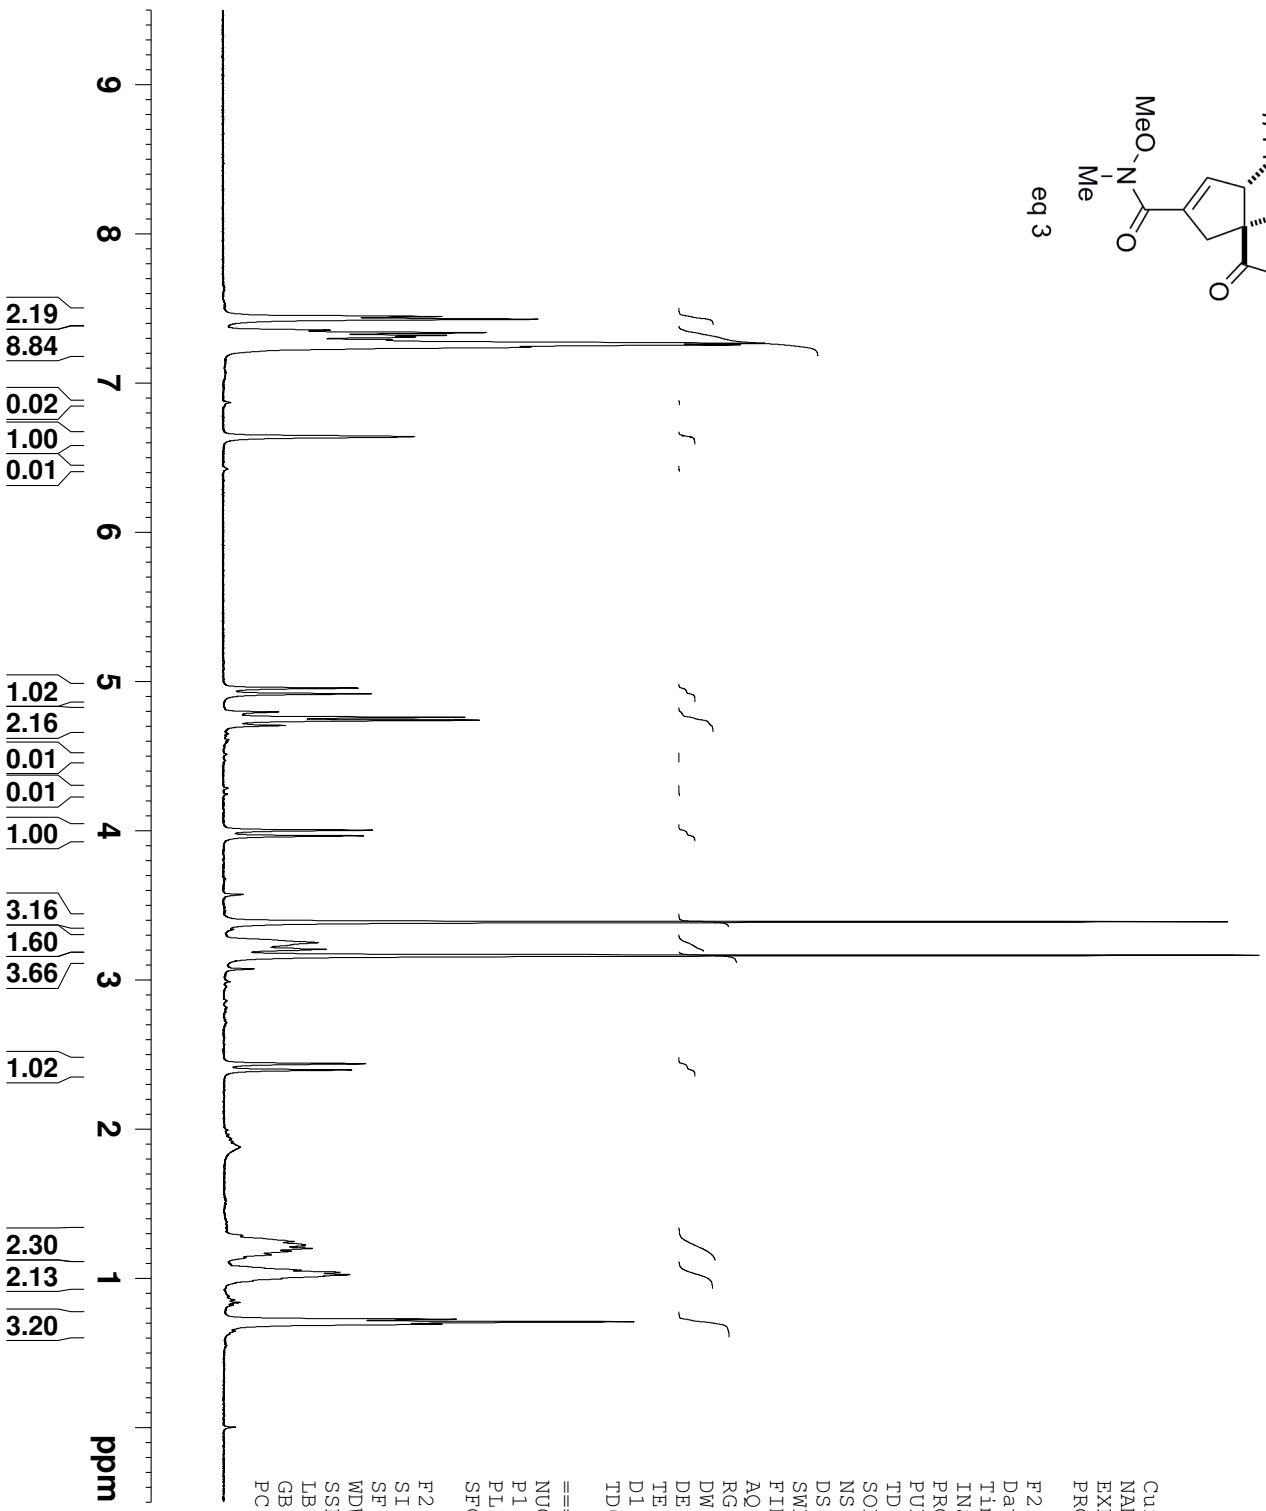

Current Data Parameters  
 NAME YF1225-3  
 EXPNO 1  
 PROCNO 1

F2 - Acquisition Parameters  
 Date\_ 20110427  
 Time 18.39  
 INSTRUM spect  
 PROBHD 5 mm QNP 1H/13  
 PULPROG zg30  
 TD 65536  
 SOLVENT CDCl3  
 NS 4  
 DS 2  
 SWH 8278.146 Hz  
 FIDRES 0.126314 Hz  
 AQ 3.9584243 sec  
 RG 143.7  
 DW 60.400 usec  
 DE 6.00 usec  
 TE 683.2 K  
 D1 1.00000000 sec  
 TD0 1

==== CHANNEL f1 =====  
 NUC1 1H  
 P1 14.00 usec  
 PL1 0.00 dB  
 SFO1 400.1324710 MHz  
 F2 - Processing parameters  
 SI 65536  
 SF 400.1300058 MHz  
 WDW no  
 SSB 0  
 LB 0.00 Hz  
 GB 0  
 PC 1.00

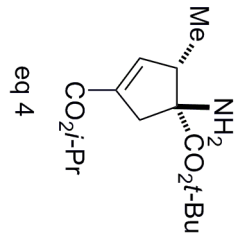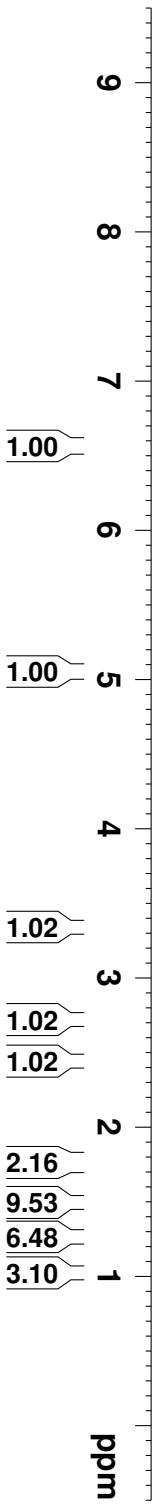

Current Data Parameters  
 NAME YF1212-3  
 EXPNO 1  
 PROCNO 1

F2 - Acquisition Parameters  
 Date\_ 20110422  
 Time 8.06

INSTRUM spect  
 PROBHD 5 mm BBO BB-1H  
 PULPROG zg30  
 TD 65536  
 SOLVENT NS

DS 4  
 SWH 8278.146 Hz  
 FIDRES 0.126314 Hz  
 AQ 3.9584243 sec  
 RG 32

DW 60.400 usec  
 DE 6.00 usec  
 TE 297.2 K  
 D1 1.00000000 sec  
 TD0 1

==== CHANNEL f1 =====  
 NUC1 1H  
 P1 15.07 usec  
 PL1 0.00 dB  
 SFO1 400.1324710 MHz

F2 - Processing parameters  
 SI 65536  
 SF 400.1299903 MHz  
 WDW no  
 SSB 0  
 LB 0.00 Hz  
 GB 0  
 PC 1.00

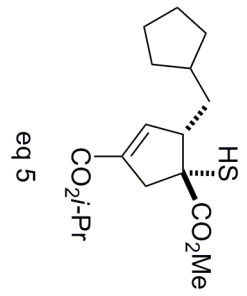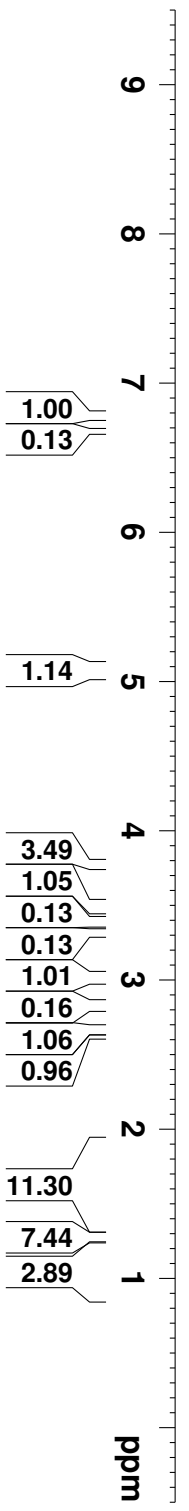

Current Data Parameters  
 NAME YF1221-1  
 EXPNO 1  
 PROCNO 1

F2 - Acquisition Parameters  
 Date\_ 20110423  
 Time 16.30  
 INSTRUM spect  
 PROBHID 5 mm QNP 1H/13  
 PULPROG zg30  
 TD 65536  
 SOLVENT CDCl3  
 NS 4  
 DS 2  
 SWH 8278.146 Hz  
 FIDRES 0.126314 Hz  
 AQ 3.9584243 sec  
 RG 90.5  
 DW 60.400 usec  
 DE 6.00 usec  
 TE 683.2 K  
 D1 1.00000000 sec  
 TD0 1

==== CHANNEL f1 =====  
 NUC1 1H  
 P1 14.00 usec  
 PL1 0.00 dB  
 SFO1 400.1324710 MHz  
 F2 - Processing parameters  
 SI 65536  
 SF 400.1299989 MHz  
 WDW no  
 SSB 0  
 LB 0.00 Hz  
 GB 0  
 PC 1.00

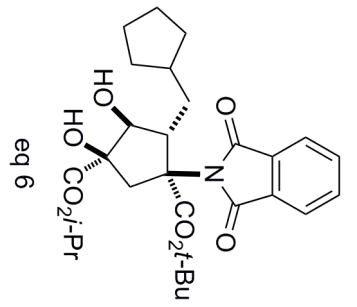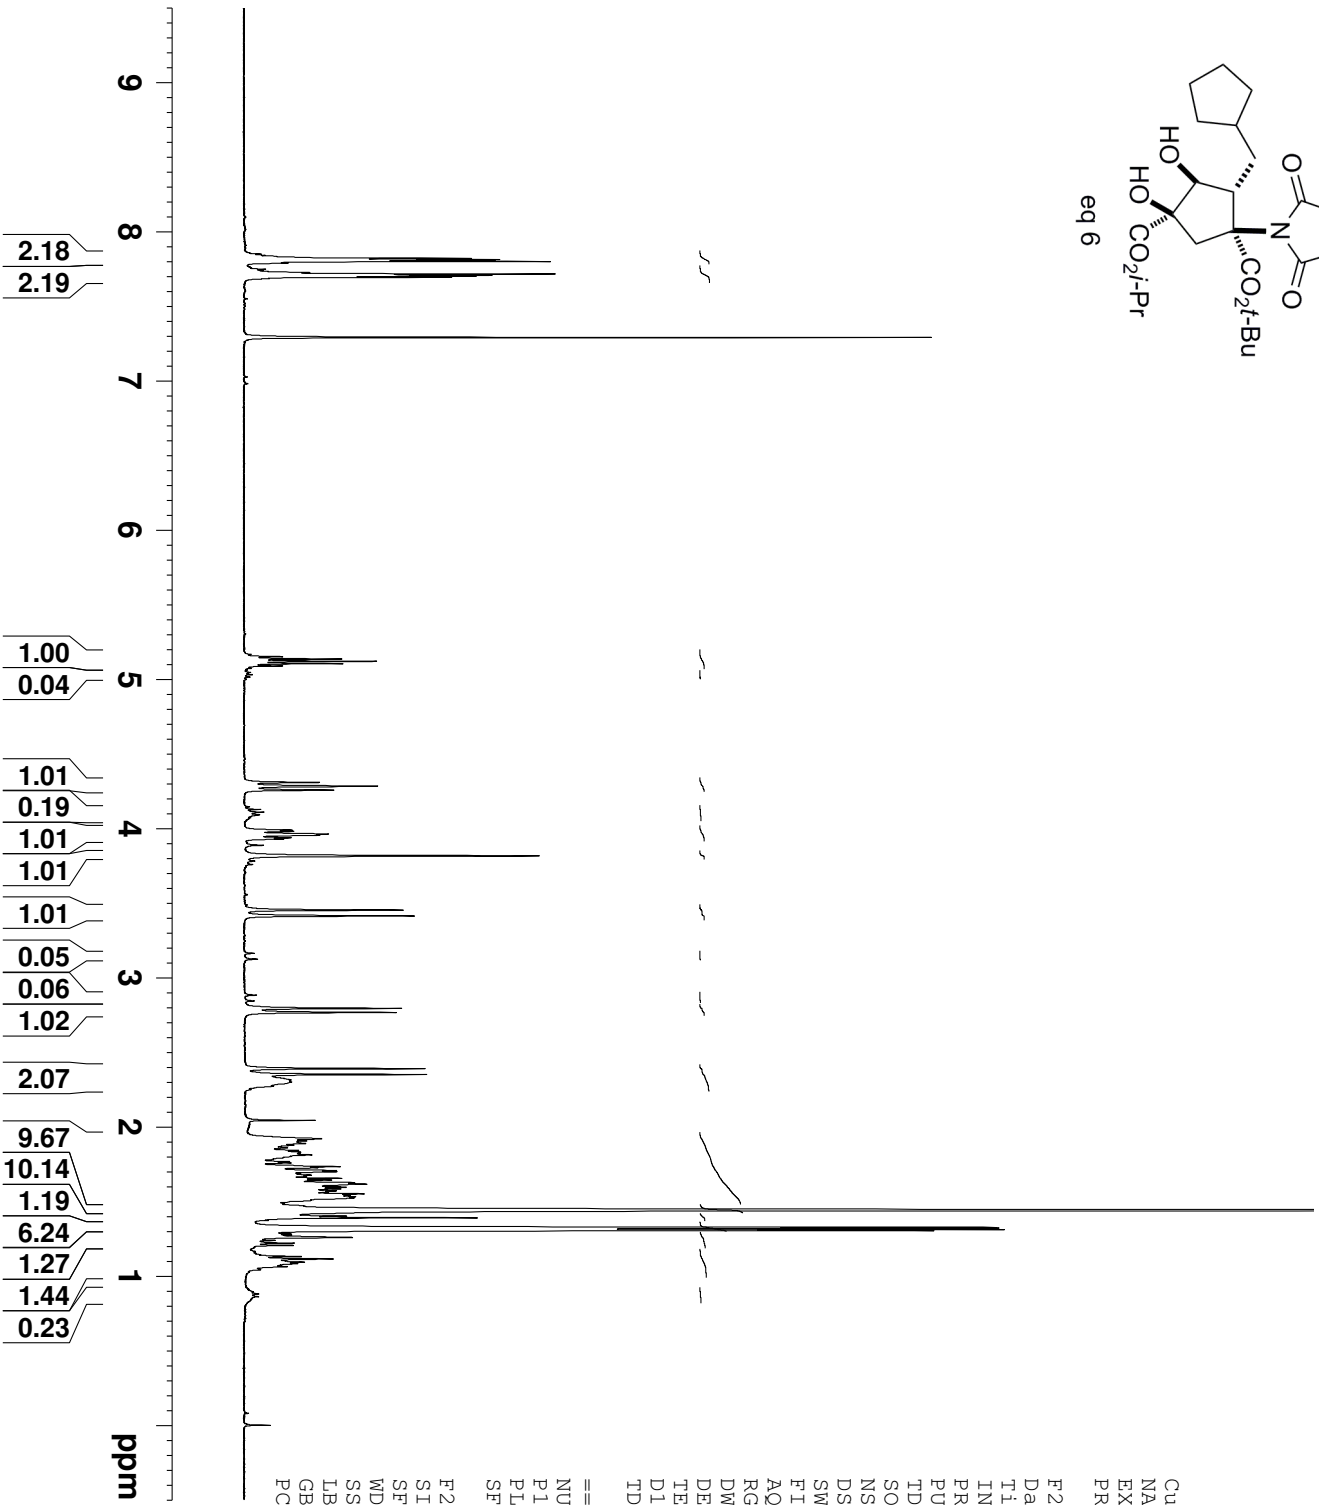

Current Data Parameters  
 NAME YF1195-1  
 EXPNO 1  
 PROCNO 1

F2 - Acquisition Parameters  
 Date\_ 20110411  
 Time 17.29  
 INSTRUM spect  
 PROBHID 5 mm QNP 1H/13  
 PULPROG zg30  
 TD 65536  
 SOLVENT CDCl3  
 NS 4  
 DS 2  
 SWH 8278.146 Hz  
 FIDRES 0.126314 Hz  
 AQ 3.9584243 sec  
 RG 40.3  
 DW 60.400 usec  
 DE 6.00 usec  
 TE 683.2 K  
 D1 1.00000000 sec  
 TD0 1

==== CHANNEL f1 =====  
 NUC1 1H  
 P1 14.00 usec  
 PL1 0.00 dB  
 SFO1 400.1324710 MHz  
 F2 - Processing parameters  
 SI 65536  
 SF 400.1299969 MHz  
 WDW no  
 SSB 0  
 LB 0.00 Hz  
 GB 0  
 PC 1.00

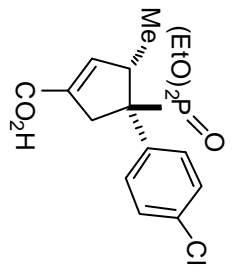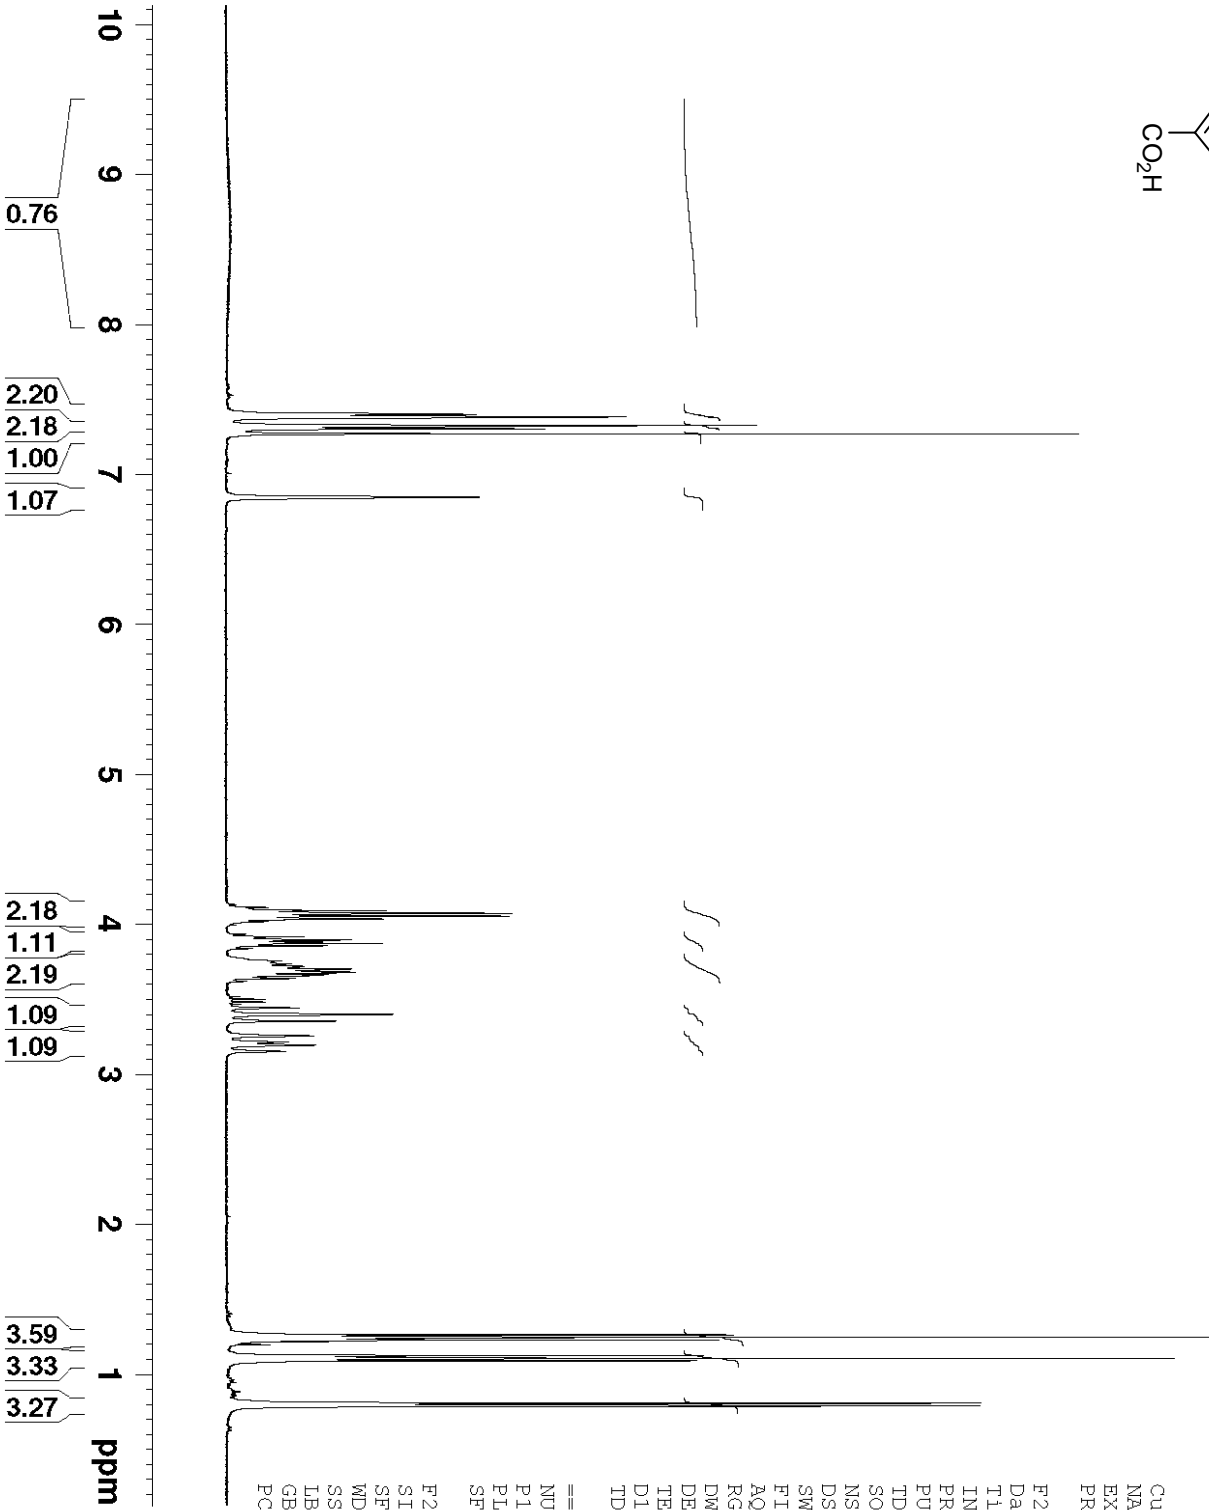

Current Data Parameters  
 NAME YF1247  
 EXPNO 1  
 PROCNO 1

F2 - Acquisition Parameters  
 Date\_ 20110504  
 Time 19.37  
 INSTRUM spect  
 PROBHD 5 mm QNP 1H/13  
 PULPROG zg30  
 TD 65536  
 SOLVENT CDCl3  
 NS 16  
 DS 2  
 SWH 8278.146 Hz  
 FIDRES 0.126314 Hz  
 AQ 3.9584243 sec  
 RG 812.7  
 DW 60.400 usec  
 DE 6.00 usec  
 TE 683.2 K  
 D1 1.00000000 sec  
 TD0 1

==== CHANNEL f1 =====  
 NUCl 1H  
 P1 14.00 usec  
 PL1 0.00 dB  
 SF01 400.1324710 MHz

F2 - Processing parameters  
 SI 65536  
 SF 400.1300060 MHz  
 WDW no  
 SSB 0  
 LB 0.00 Hz  
 GB 0  
 PC 1.00

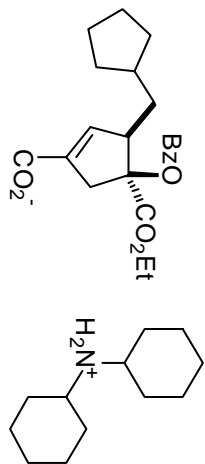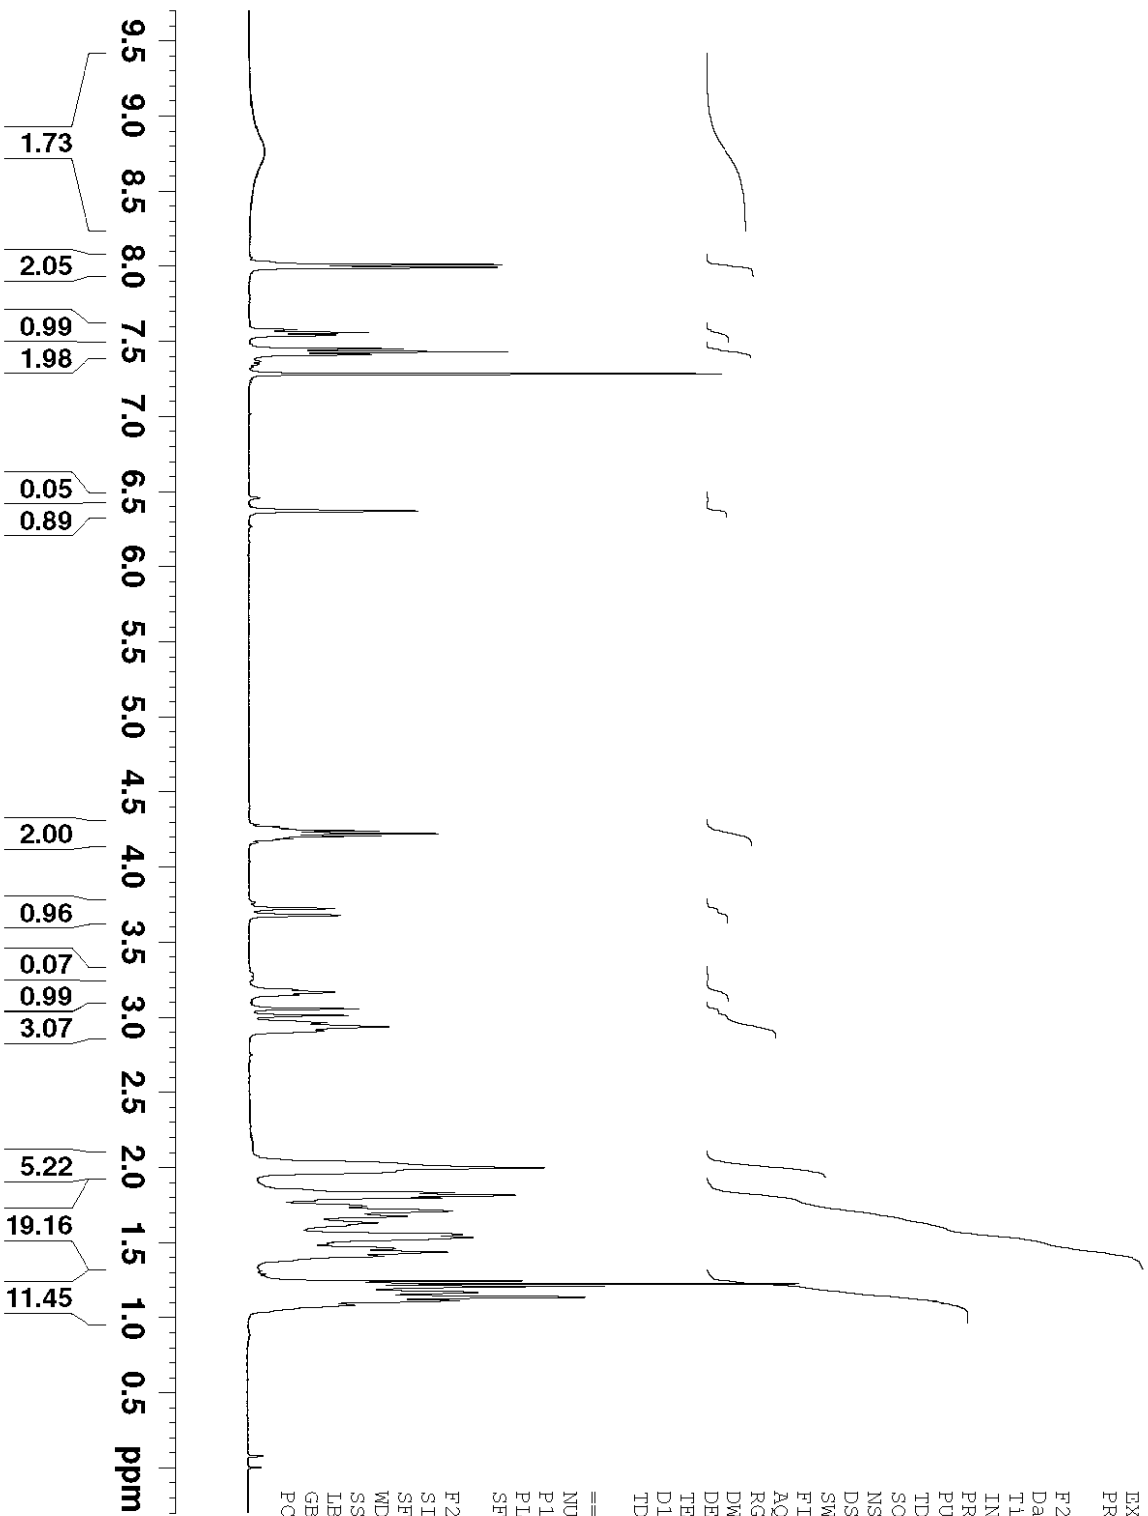

Current Data Parameters  
 NAME YF1228-5  
 EXENO 1  
 PROCNO 1

F2 - Acquisition Parameters

Date\_ 20110507  
 Time 14.05  
 INSTRUM spect  
 PROBHD 5 mm BBO BB-1H  
 PULPROG zg30  
 TD 65536  
 SOLVENT  
 NS 4  
 DS 2  
 SWH 8278.146 Hz  
 FIDRES 0.126314 Hz  
 AQ 3.9584243 sec  
 RG 32  
 DW 60.400 usec  
 DE 6.00 usec  
 TE 299.2 K  
 D1 1.00000000 sec  
 TD0 1

==== CHANNEL F1 =====  
 NUC1 1H  
 P1 15.07 usec  
 PL1 0.00 dB  
 SFO1 400.1324710 MHz

F2 - Processing parameters  
 SI 65536  
 SF 400.1300009 MHz  
 WDW no  
 SSB 0  
 IB 0.00 Hz  
 GB 0  
 PC 1.00



IX. HPLC/SFC Traces

Data File C:\HPCHEM\1\DATA\GROUP\VF1048R7.D

Sample Name: VF1048 RAC

Injection Date : 3/3/2011 2:35:36 AM  
 Sample Name : VF1048 RAC  
 Acq. Operator : JTM  
 Acq. Instrument : Instrument 1  
 Different Inj Volume from Sequence : Actual Inj Volume : 5 µl  
 Acq. Method : C:\HPCHEM\1\METHODS\VC-3050.M  
 Last changed : 3/2/2011 10:09:34 PM by JTM  
 Analysis Method : C:\HPCHEM\1\METHODS\ADH-1020.M  
 Last changed : 3/2/2011 10:10:29 PM by JTM

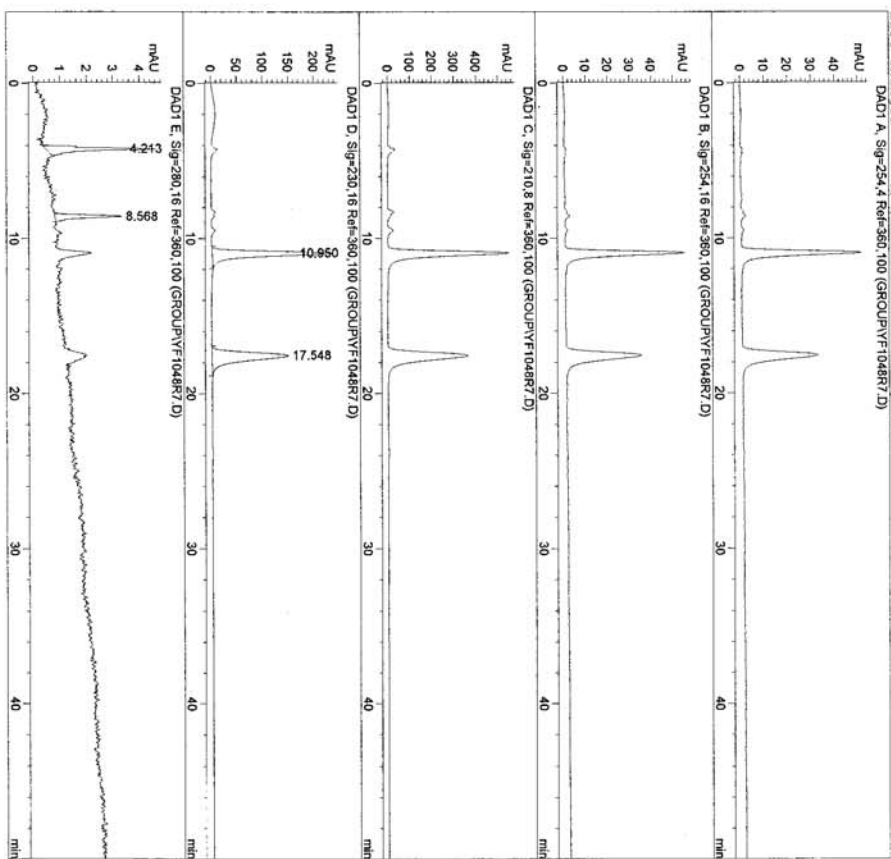

Instrument 1 3/3/2011 8:56:01 AM JTM

Page 1 of 2

Data File C:\HPCHEM\1\DATA\GROUP\VF1048R7.D

Sample Name: VF1048 RAC

Area Percent Report

Sorted By : Signal  
 Multiplier : 1.0000  
 Dilution : 1.0000  
 Use Multiplier & Dilution Factor with ISTDs

| Signal                                   | Peak # | RetTime [min] | Type | Width [min] | Area [mAU*s] | Height [mAU] | Area %  |
|------------------------------------------|--------|---------------|------|-------------|--------------|--------------|---------|
| Signal 1: DADI A, Sig=254,4 Ref=360,100  | 1      | 4.213         | PB   | 0.1953      | 57.50676     | 4.15948      | 62.5202 |
|                                          | 2      | 8.568         | BB   | 0.1963      | 34.47427     | 2.54110      | 37.4798 |
| Totals :                                 |        |               |      |             | 91.98103     | 6.70058      |         |
| Signal 2: DADI B, Sig=254,16 Ref=360,100 | 1      | 10.950        | PB   | 0.3411      | 5293.27539   | 234.67831    | 50.3783 |
|                                          | 2      | 17.548        | BB   | 0.5333      | 5213.78613   | 148.60362    | 49.6217 |
| Totals :                                 |        |               |      |             | 1.05071e4    | 383.28194    |         |
| Signal 3: DADI C, Sig=210,8 Ref=360,100  | 1      | 10.950        | PB   | 0.3411      | 5293.27539   | 234.67831    | 50.3783 |
|                                          | 2      | 17.548        | BB   | 0.5333      | 5213.78613   | 148.60362    | 49.6217 |
| Totals :                                 |        |               |      |             | 1.05071e4    | 383.28194    |         |
| Signal 4: DADI D, Sig=230,16 Ref=360,100 | 1      | 10.950        | PB   | 0.3411      | 5293.27539   | 234.67831    | 50.3783 |
|                                          | 2      | 17.548        | BB   | 0.5333      | 5213.78613   | 148.60362    | 49.6217 |
| Totals :                                 |        |               |      |             | 1.05071e4    | 383.28194    |         |
| Signal 5: DADI E, Sig=280,16 Ref=360,100 | 1      | 4.213         | PB   | 0.1953      | 57.50676     | 4.15948      | 62.5202 |
|                                          | 2      | 8.568         | BB   | 0.1963      | 34.47427     | 2.54110      | 37.4798 |
| Totals :                                 |        |               |      |             | 91.98103     | 6.70058      |         |

Results obtained with enhanced integrator!  
 \*\*\* End of Report \*\*\*

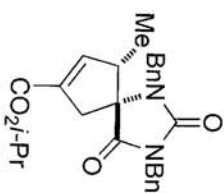

Table 2, entry 1  
 racemic sample

Instrument 1 3/3/2011 8:56:01 AM JTM

Page 2 of 2

Injection Date : 3/3/2011 3:26:51 AM      Seq. Line : 11  
 Sample Name : VF1048 S-cat                      Location : Vial 57  
 Acq. Operator : JTM  
 Acq. Instrument : Instrument 1                      Inj Volume : 1 µl  
 Different Inj Volume from Sequence 1              Inj Volume : 5 µl  
 Acq. Method : C:\HPCHEM\1\METHODS\VC-3030.M  
 Last changed : 3/2/2011 10:09:34 PM by JTM  
 Analysis Method : C:\HPCHEM\1\METHODS\ADH-1020.M  
 Last changed : 3/2/2011 10:10:29 PM by JTM

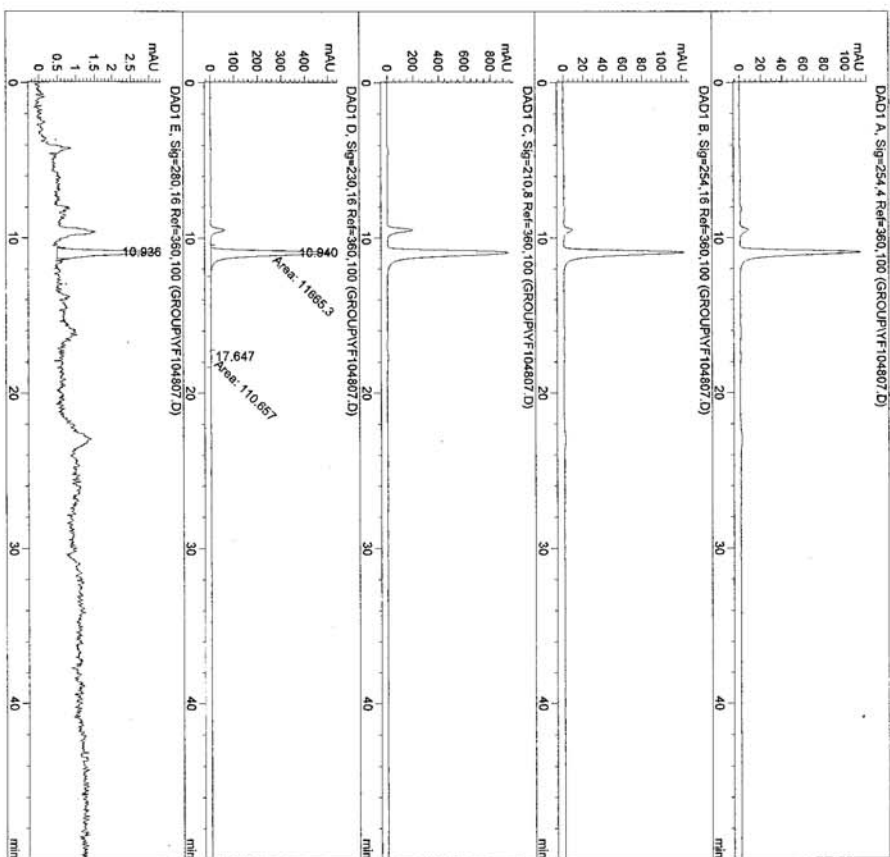

Area Percent Report

Sorted By : Signal  
 Multiplier : 1.0000  
 Dilution : 1.0000  
 Use Multiplier & Dilution Factor with ISTDs

Signal 1: DADI A, sig=254,4 Ref=360,100

Signal 2: DADI B, sig=254,16 Ref=360,100

Signal 3: DADI C, sig=210,8 Ref=360,100

Signal 4: DADI D, sig=230,16 Ref=360,100

| Peak #   | RetTime [min] | Type | Width [min] | Area [mAU*s] | Height [mAU] | Area %  |
|----------|---------------|------|-------------|--------------|--------------|---------|
| 1        | 10.940        | NM   | 0.3770      | 1.1665364    | 515.71472    | 99.0603 |
| 2        | 17.647        | NM   | 0.6190      | 110.65682    | 2.97947      | 0.9397  |
| Totals : |               |      |             | 1.1775964    | 518.69419    |         |

Results obtained with enhanced integrator!

Signal 5: DADI E, sig=280,16 Ref=360,100

| Peak #   | RetTime [min] | Type | Width [min] | Area [mAU*s] | Height [mAU] | Area %   |
|----------|---------------|------|-------------|--------------|--------------|----------|
| 1        | 10.936        | BB   | 0.2591      | 56.46589     | 2.68731      | 100.0000 |
| Totals : |               |      |             | 56.46589     | 2.68731      |          |

Results obtained with enhanced integrator!

\*\*\* End of Report \*\*\*

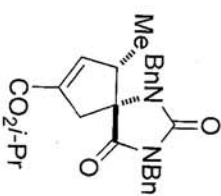

Table 2, entry 1  
 with (S)-catalyst

Injection Date : 3/3/2011 4:18:06 AM      Seq. Line : 12  
 Sample Name : VF1075 R-cat                      Location : Vial 58  
 Acq. Operator : JTM  
 Acq. Instrument : Instrument 1  
 Different Inj Volume from Sequence : Actual Inj Volume : 5 µl  
 Acq. Method : C:\HPCHEM\1\METHODS\IC-3050.M  
 Last changed : 3/2/2011 10:09:34 PM by JTM  
 Analysis Method : C:\HPCHEM\1\METHODS\ADH-1020.M  
 Last changed : 3/2/2011 10:10:29 PM by JTM

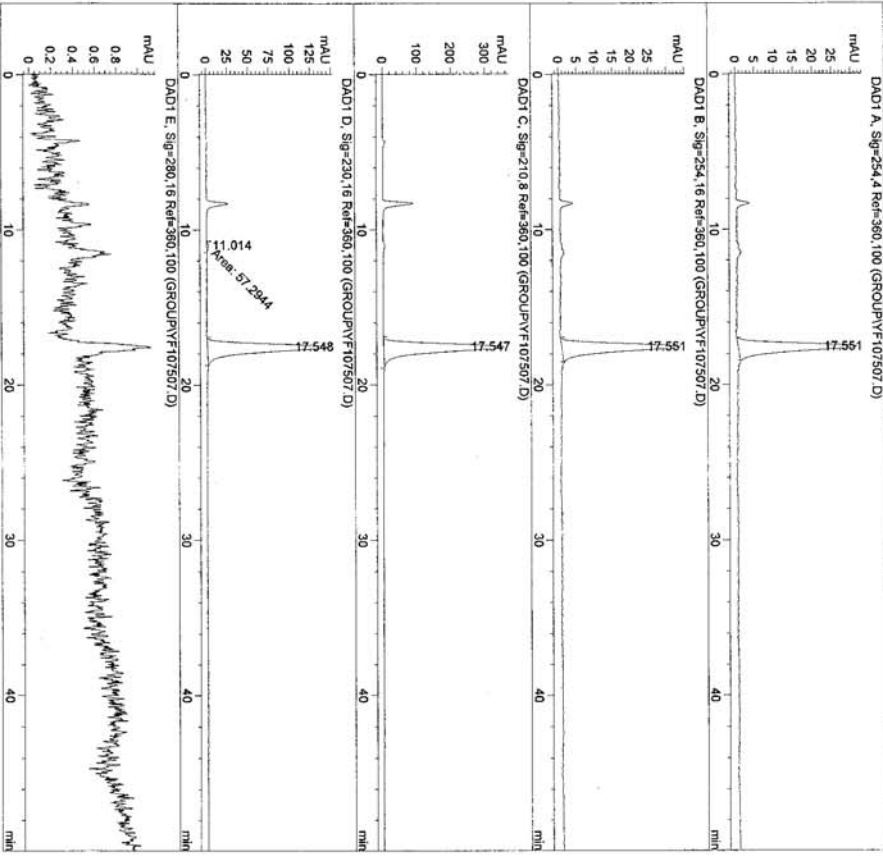

Area Percent Report

Sorted By : Signal  
 Multiplier : 1.0000  
 Dilution : 1.0000  
 Use Multiplier & Dilution Factor with ISTDs

Signal 1: DADI A, Sig=254,4 Ref=360,100

| Peak #                       | RetTime [min] | Type | Width [min] | Area [mAU*s] | Height [mAU] | Area %   |
|------------------------------|---------------|------|-------------|--------------|--------------|----------|
| 1                            | 17.551        | BB   | 0.4886      | 1050.73804   | 30.91210     | 100.0000 |
| Totals : 1050.73804 30.91210 |               |      |             |              |              |          |

Results obtained with enhanced integrator!

Signal 2: DADI B, Sig=254,16 Ref=360,100

| Peak #                       | RetTime [min] | Type | Width [min] | Area [mAU*s] | Height [mAU] | Area %   |
|------------------------------|---------------|------|-------------|--------------|--------------|----------|
| 1                            | 17.551        | BB   | 0.4913      | 1131.36682   | 33.05995     | 100.0000 |
| Totals : 1131.36682 33.05995 |               |      |             |              |              |          |

Results obtained with enhanced integrator!

Signal 3: DADI C, Sig=210,8 Ref=360,100

| Peak #                       | RetTime [min] | Type | Width [min] | Area [mAU*s] | Height [mAU] | Area %   |
|------------------------------|---------------|------|-------------|--------------|--------------|----------|
| 1                            | 17.547        | BB   | 0.5472      | 1.26251e4    | 353.08881    | 100.0000 |
| Totals : 1.26251e4 353.08881 |               |      |             |              |              |          |

Results obtained with enhanced integrator!

Signal 4: DADI D, Sig=230,16 Ref=360,100

| Peak #                        | RetTime [min] | Type | Width [min] | Area [mAU*s] | Height [mAU] | Area %  |
|-------------------------------|---------------|------|-------------|--------------|--------------|---------|
| 1                             | 11.014        | NM   | 0.4460      | 57.29445     | 2.14089      | 1.1258  |
| 2                             | 17.548        | BB   | 0.5333      | 5031.85107   | 144.12061    | 98.8742 |
| Totals : 5089.14552 146.26150 |               |      |             |              |              |         |

Results obtained with enhanced integrator!  
 Signal 5: DADI E, Sig=280,16 Ref=360,100  
 \*\*\* End of Report \*\*\*

Table 2, entry 1  
 with (R)-catalyst

Injection Date : 2/22/2011 8:01:01 PM  
 Sample Name : YF1049 RAC  
 Acq. Operator : YL  
 Acq. Instrument : Instrument 1  
 Different Inj Volume from Sequence : Actual Inj Volume : 15 µl  
 Acq. Method : C:\HPCHEM\1\METHODS\AD-03-40.M  
 Last changed : 2/18/2007 7:39:36 PM by GROUP  
 Analysis Method : C:\HPCHEM\1\METHODS\01-AD20.M  
 First changed : 2/22/2011 7:02:11 PM by JTM

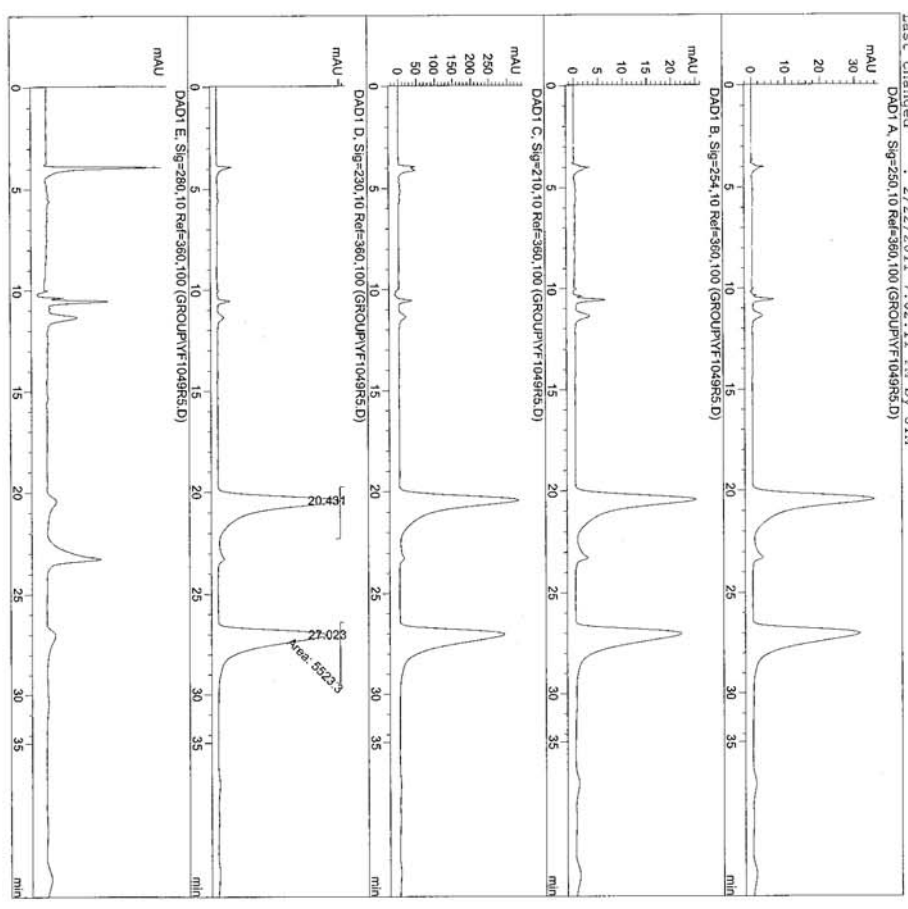

Area Percent Report  
 Sorted By : Signal  
 Multiplier : 1.0000  
 Dilution : 1.0000  
 Use Multiplier & Dilution Factor with ISTDs

| Signal                                     | Peak #                                     | Retention Time [min] | Type | Width [min] | Area [mAU*s] | Height [mAU] | Area %  |
|--------------------------------------------|--------------------------------------------|----------------------|------|-------------|--------------|--------------|---------|
| Signal 1: DAD1 A, Sig=250, 10 Ref=360, 100 | 1                                          | 20.431               | BB   | 0.6563      | 5441.49072   | 122.02242    | 49.6259 |
| Signal 2: DAD1 B, Sig=254, 10 Ref=360, 100 | 2                                          | 27.023               | MM   | 0.8579      | 5523.30078   | 107.30299    | 50.3731 |
| Signal 3: DAD1 C, Sig=210, 10 Ref=360, 100 | Totals : 1.09648e4 229.32542               |                      |      |             |              |              |         |
| Signal 4: DAD1 D, Sig=230, 10 Ref=360, 100 | Results obtained with enhanced integrator! |                      |      |             |              |              |         |
| Signal 5: DAD1 E, Sig=280, 10 Ref=360, 100 | *** End of Report ***                      |                      |      |             |              |              |         |

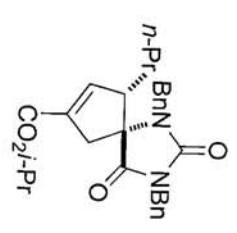

Table 2, entry 2  
 racemic sample

Injection Date : 2/22/2011 8:42:15 PM  
 Sample Name : YF1049 S-cat  
 Acq. Operator : JL  
 Acq. Instrument : Instrument 1  
 Different Inj Volume from Sequence : Actual Inj Volume : 15 µl  
 Acq. Method : C:\VHPCHEM\1\METHODS\AD-03-40.M  
 Last changed : 2/18/2007 7:39:36 PM by GROUP  
 Analysis Method : C:\VHPCHEM\1\METHODS\AD-AD20.M  
 Last changed : 2/22/2011 7:02:11 PM by JTM

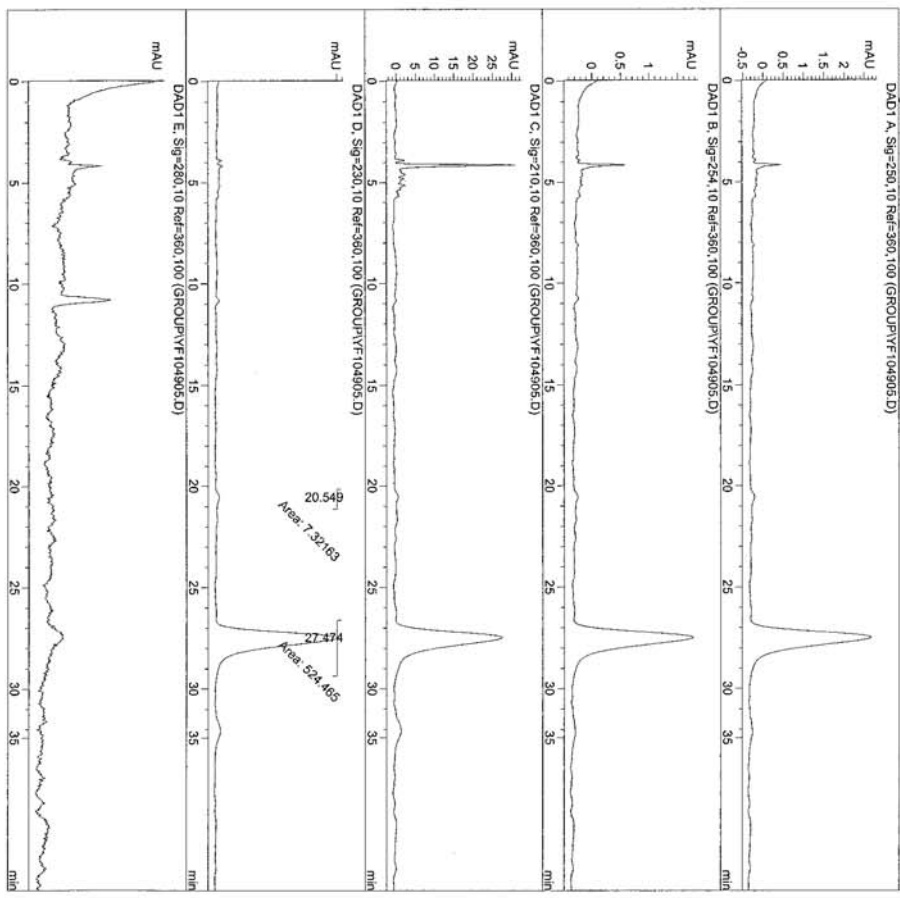

Area Percent Report

Sorted By : Signal  
 Multiplier : 1.0000  
 Dilution : 1.0000  
 Use Multiplier & Dilution Factor with ISTDs

| Signal                                   | Peak # | RetTime [min] | Type | Width [min] | Area [mAU*s] | Height [mAU] | Area %  |
|------------------------------------------|--------|---------------|------|-------------|--------------|--------------|---------|
| Signal 1: DAD1 A, Sig=250,10 Ref=360,100 | 1      | 20.549        | MM   | 0.4435      | 7.32163      | 2.75120e-1   | 1.3768  |
| Signal 2: DAD1 B, Sig=254,10 Ref=360,100 | 2      | 27.474        | MM   | 0.8419      | 524.46497    | 10.38302     | 98.6232 |
| Totals :                                 |        |               |      |             | 531.78660    | 10.65814     |         |

Results obtained with enhanced integrator:

Signal 5: DAD1 E, Sig=280,10 Ref=360,100

\*\*\* End of Report \*\*\*

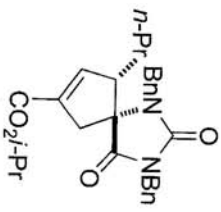

Table 2, entry 2  
 with (S)-catalyst

Injection Date : 2/22/2011 9:23:28 PM  
 Sample Name : YF1076 R-cat  
 Acq. Operator : YL  
 Acq. Instrument : Instrument 1  
 Different Inj Volume from Sequence : Actual Inj Volume : 15 µl  
 Acq. Method : C:\HPCHEM\1\METHODS\AD-03-40.M  
 Last changed : 2/18/2007 7:39:36 PM by GROUP  
 Analysis Method : C:\HPCHEM\1\METHODS\VOJ-AD20.M  
 Last changed : 2/22/2011 7:02:11 PM by JTM

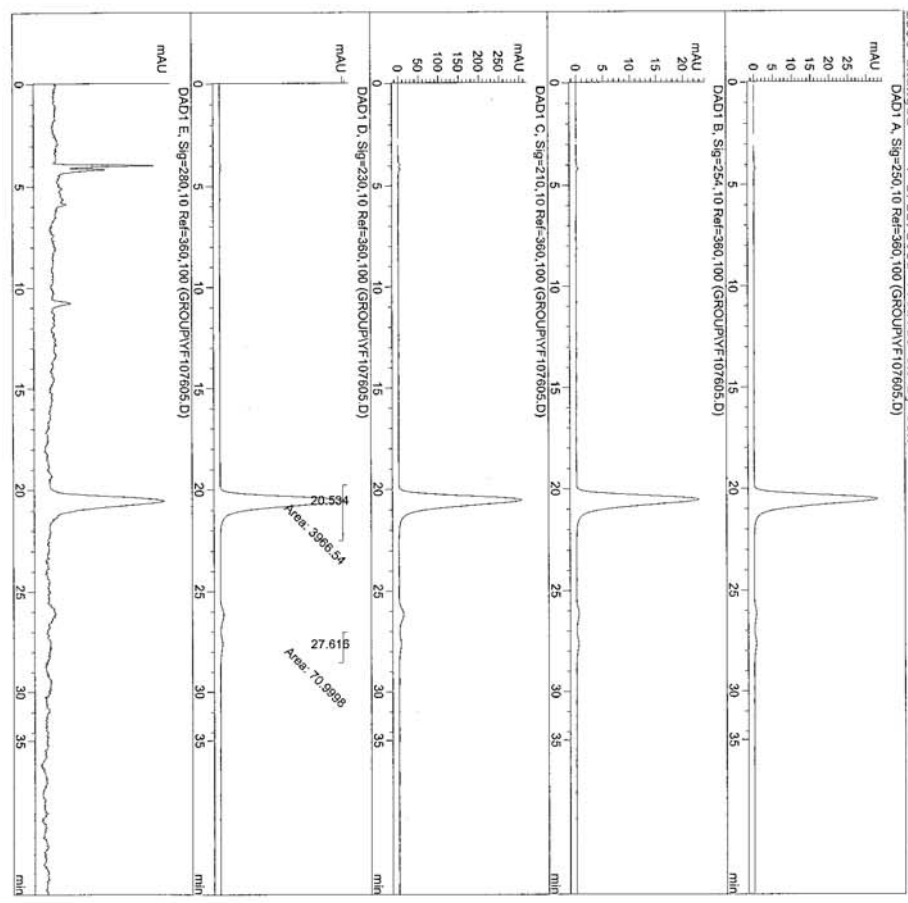

Area Percent Report

Sorted By : Signal  
 Multiplier : 1.0000  
 Dilution : 1.0000  
 Use Multiplier & Dilution Factor with ISTDs

| Signal                                   | RetTime [min] | Type | Width [min] | Area [mAU*s] | Height [mAU] | Area %  |
|------------------------------------------|---------------|------|-------------|--------------|--------------|---------|
| Signal 1: DADI A, Sig=250,10 Ref=360,100 | 20.534        | NM   | 0.5828      | 3966.53564   | 113.43987    | 98.2415 |
| Signal 2: DADI B, Sig=254,10 Ref=360,100 | 27.615        | NM   | 0.7389      | 70.99984     | 1.60149      | 1.7585  |
| Signal 3: DADI C, Sig=210,10 Ref=360,100 |               |      |             |              |              |         |
| Signal 4: DADI D, Sig=230,10 Ref=360,100 |               |      |             |              |              |         |
| Signal 5: DADI E, Sig=280,10 Ref=360,100 |               |      |             |              |              |         |
| Totals:                                  |               |      |             | 4037.53548   | 115.04136    |         |

Results obtained with enhanced integrator!

\*\*\* End of Report \*\*\*

*V-R* *2-cat*  
 Table 2, entry 2  
 with (R)-catalyst

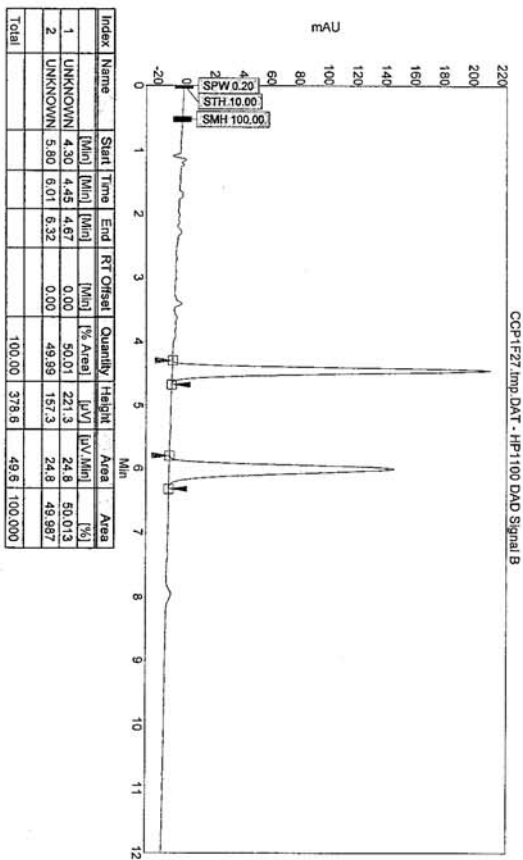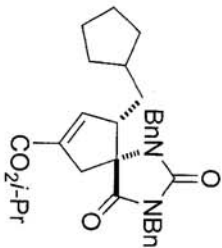

Table 2, entry 3  
racemic sample

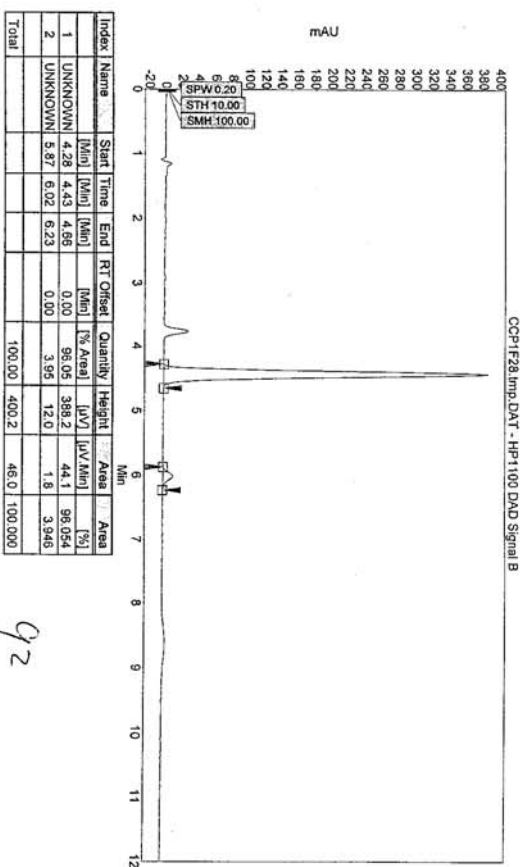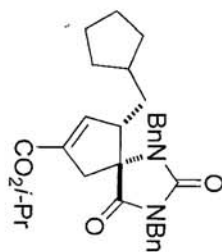

Table 2, entry 3  
with (S)-catalyst

92

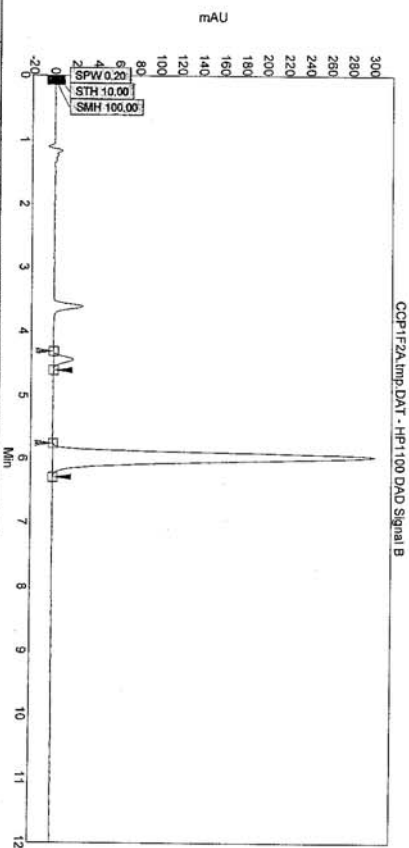

| Index | Name    | Start Time [Min] | End Time [Min] | RT Offset [Min] | Quantity [% Area] | Height [UV] | Area [UV*Min] | Area [%] |
|-------|---------|------------------|----------------|-----------------|-------------------|-------------|---------------|----------|
| 1     | UNKNOWN | 4.31             | 4.44           | 0.00            | 3.85              | 18.1        | 2.0           | 3.845    |
| 2     | UNKNOWN | 5.76             | 5.97           | 0.00            | 96.15             | 302.1       | 49.4          | 96.155   |
| Total |         |                  |                |                 | 100.00            | 320.2       | 51.4          | 100.000  |

Table 2, entry 3  
with (R)-catalyst



Acq. Operator : ATP  
 Acq. Instrument : Instrument 1  
 Injection Date : 2/26/2011 5:37:01 PM  
 Seq. Line : 15  
 Location : Vial 13  
 Inj : 1  
 Inj Volume : 1 µl  
 Actual Inj Volume : 3 µl  
 Different Inj Volume from Sequence :  
 Acq. Method : C:\CHEM32\1\DATA\YFUJIMARA\ELLIOT-S2 2011-02-26 09-27-38\AD-H03-40.M  
 Last changed : 2/26/2011 9:29:04 AM by ATP  
 Analysis Method : C:\CHEM32\1\METHODS\AD-H02-60.M  
 Last changed : 2/26/2011 9:55:58 AM by ATP

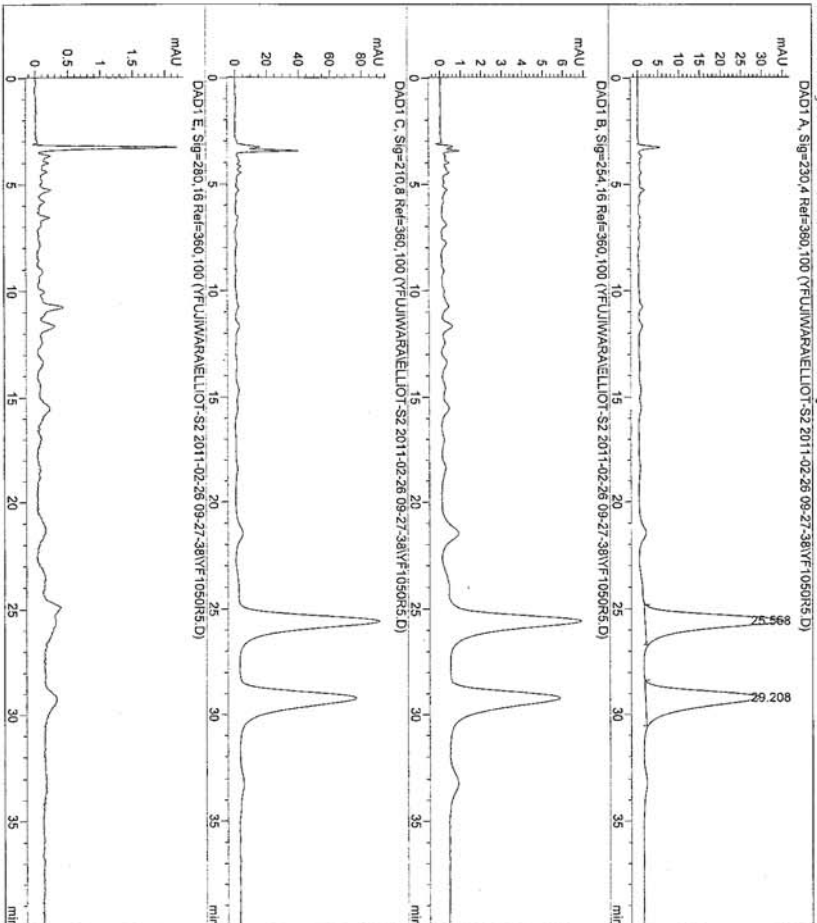

Area Percent Report

Sorted By : Signal  
 Multiplier : 1.0000  
 Dilution : 1.0000  
 Use Multiplier & Dilution Factor with ISTDs

Signal 1: DAD1 A, Sig=230,4 Ref=360,100

| Peak #   | RetTime [min] | Type | Width [min] | Area [mAU*s] | Height [mAU] | Area %  |
|----------|---------------|------|-------------|--------------|--------------|---------|
| 1        | 25.568        | BB   | 0.6491      | 1459.88733   | 33.58491     | 50.4819 |
| 2        | 29.208        | BB   | 0.7678      | 1432.01428   | 27.85373     | 49.5181 |
| Totals : |               |      |             | 2891.90161   | 61.43864     |         |

Signal 2: DAD1 B, Sig=254,16 Ref=360,100

Signal 3: DAD1 C, Sig=210,8 Ref=360,100

Signal 4: DAD1 E, Sig=280,16 Ref=360,100

\*\*\* End of Report \*\*\*

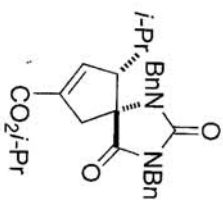

Table 2, entry 4

racemic sample

Acq. Operator : ATP  
 Acq. Instrument : Instrument 1  
 Injection Date : 2/26/2011 6:18:17 PM  
 Seq. Line : 16  
 Location : Vial 14  
 Inj : 1  
 Inj Volume : 1 µl  
 Actual Inj Volume : 3 µl  
 Acq. Method : C:\CHEM32\1\DATA\YFUJIMARA\ELLIOT-S2 2011-02-26 09-27-38\AD-H03-40.M  
 Last changed : 2/26/2011 9:29:04 AM by ATP  
 Analysis Method : C:\CHEM32\1\METHODS\AD-H02-60.M  
 Last changed : 2/26/2011 9:35:36 AM by ATP

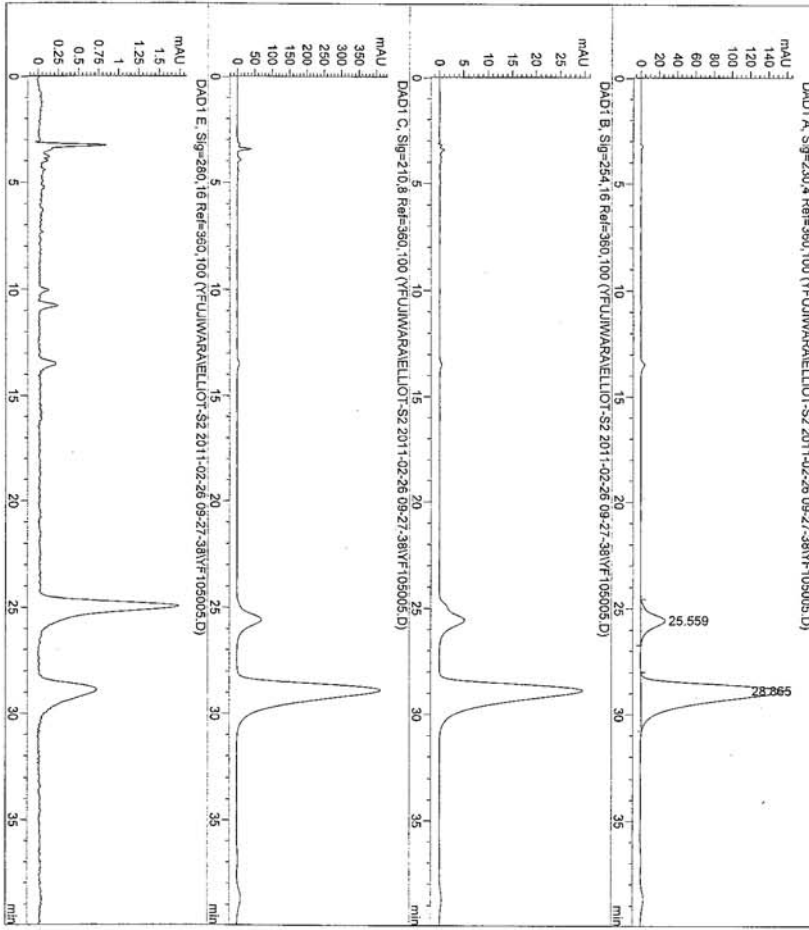

Area Percent Report

Sorted By : Signal  
 Multiplier: : 1.0000  
 Dilution: : 1.0000  
 Use Multiplier & Dilution Factor with ISTDs

Signal 1: DAD1 A, Sig=230,4 Ref=360,100

| Peak #   | RetTime [min] | Type | Width [min] | Area [mAU*s] | Height [mAU] | Area %  |
|----------|---------------|------|-------------|--------------|--------------|---------|
| 1        | 25.559        | BB   | 0.6715      | 1229.21667   | 26.78090     | 12.5102 |
| 2        | 28.865        | BB   | 0.8207      | 8596.53125   | 157.03171    | 87.4898 |
| Totals : |               |      |             | 9825.74792   | 183.81261    |         |

Signal 2: DAD1 B, Sig=254,16 Ref=360,100  
 Signal 3: DAD1 C, Sig=210,8 Ref=360,100  
 Signal 4: DAD1 E, Sig=280,16 Ref=360,100

\*\*\* End of Report \*\*\*

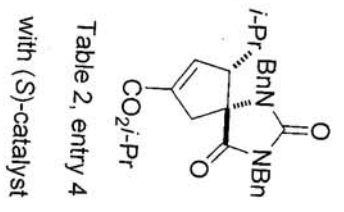

Acq. Operator : ATP  
 Acq. Instrument : Instrument 1  
 Injection Date : 2/26/2011 6:59:32 PM  
 Seq. Line : 17  
 Location : Vial 15  
 Inj : 1  
 Inj Volume : 1 µl  
 Actual Inj Volume : 3 µl  
 Different Inj Volume from Sequence :  
 Acq. Method : C:\CHEM32\1\DATA\YFUJIMARA\ELLIOT-S2 2011-02-26 09-27-38\AD-H03-40.M  
 Last changed : 2/26/2011 9:29:04 AM by ATP  
 Analysis Method : C:\CHEM32\1\METHODS\AD-H02-60.M  
 Last changed : 2/26/2011 9:55:58 AM by ATP

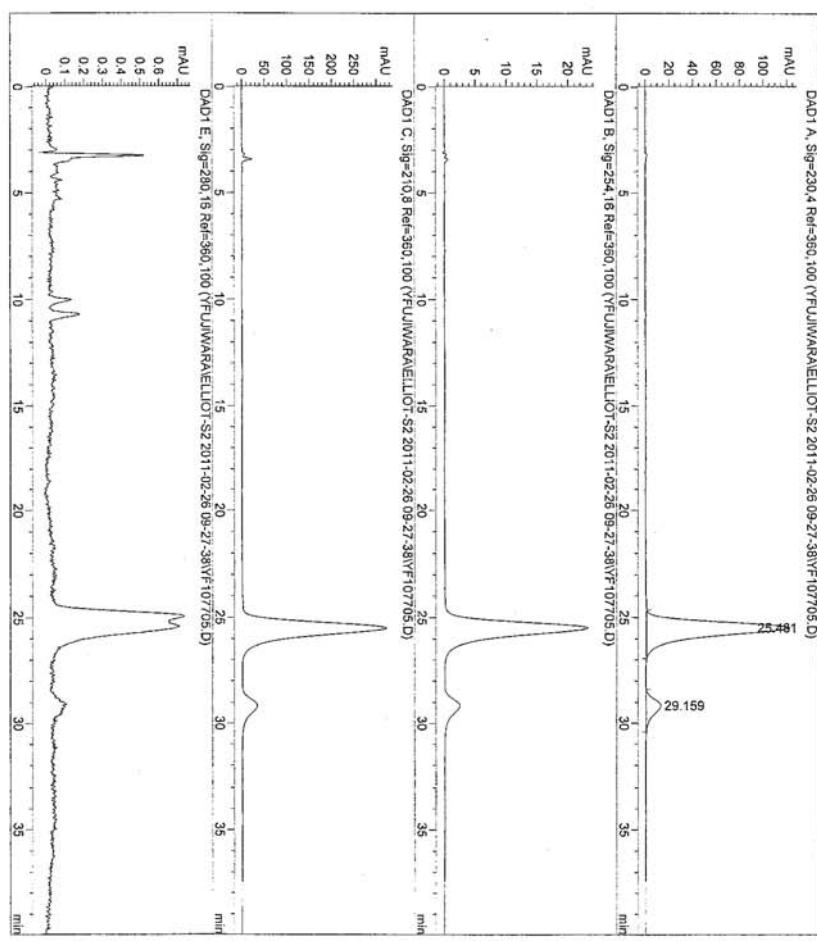

Area Percent Report

Sorted By : Signal  
 Multiplier: 1.0000  
 Dilution: 1.0000  
 Use Multiplier & Dilution Factor with ISTDs

Signal 1: DAD1 A, Sig=230.4 Ref=360.100

| Peak #   | RetTime [min] | Type | Width [min] | Area [mAU*s] | Height [mAU] | Area %  |
|----------|---------------|------|-------------|--------------|--------------|---------|
| 1        | 25.481        | BB   | 0.6640      | 5354.84473   | 122.01455    | 89.5248 |
| 2        | 29.159        | BB   | 0.7317      | 626.56525    | 12.39701     | 10.4752 |
| Totals : |               |      |             | 5981.40997   | 134.41156    |         |

Table 2, entry 4  
 with (R)-catalyst

Signal 2: DAD1 B, Sig=254.16 Ref=360.100  
 Signal 3: DAD1 C, Sig=210.8 Ref=360.100  
 Signal 4: DAD1 E, Sig=280.16 Ref=360.100

\*\*\* End of Report \*\*\*

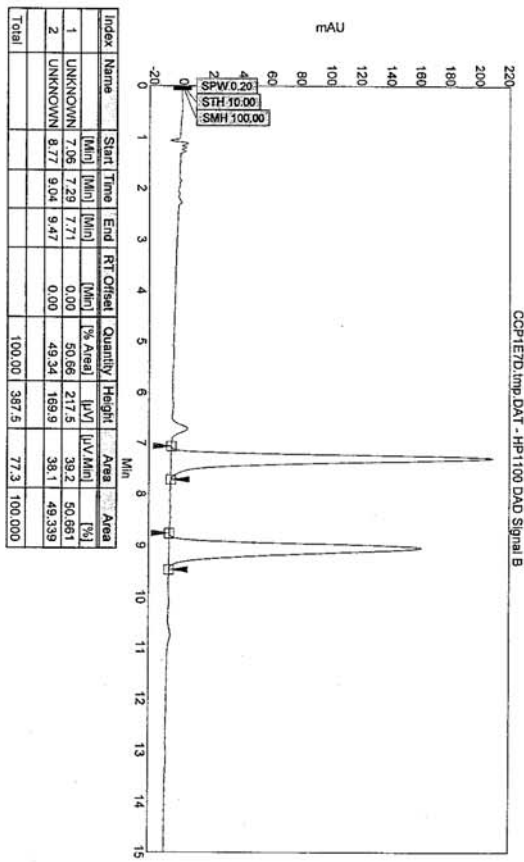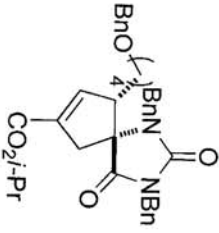

Table 2, entry 5  
racemic sample

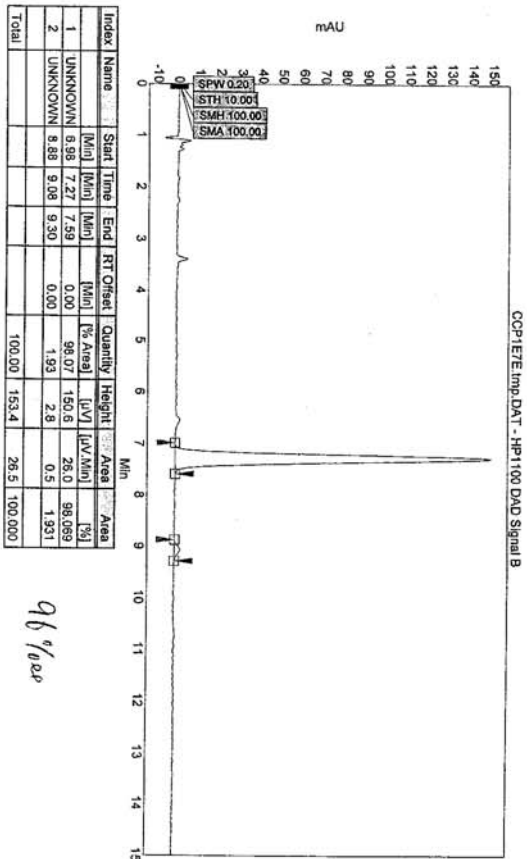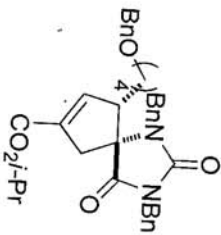

Table 2, entry 5  
with (S)-catalyst

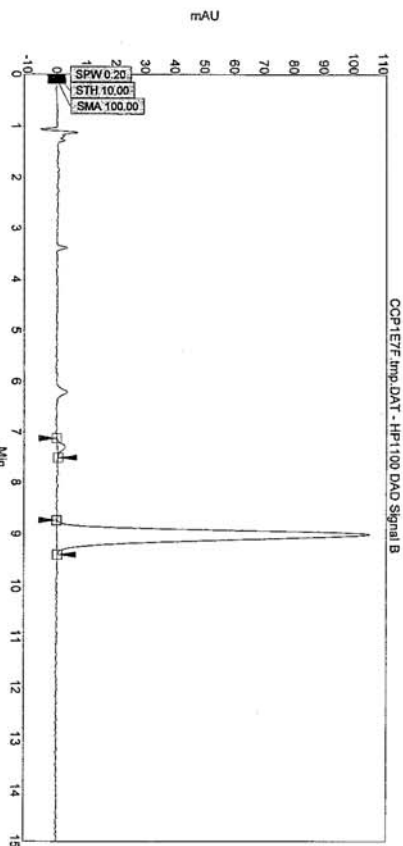

| Index | Name    | Start Time [Min] | End [Min] | RT Offset [Min] | Quantity [% Area] | Height [UV/Min] | Area [Area] | Area [%] |
|-------|---------|------------------|-----------|-----------------|-------------------|-----------------|-------------|----------|
| 1     | UNKNOWN | 7.12             | 7.31      | 0.00            | 1.80              | 2.6             | 0.4         | 1.805    |
| 2     | UNKNOWN | 8.74             | 9.01      | 0.00            | 98.20             | 105.3           | 23.2        | 98.195   |
| Total |         |                  |           |                 | 100.00            | 108.0           | 23.6        | 100.000  |

Table 2, entry 5  
with (R)-catalyst

Injection Date : 3/3/2011 9:37:20 AM  
 Sample Name : YF1054 RAC  
 Acq. Operator : JTM  
 Acq. Instrument : Instrument 1  
 Different Inj Volume from Sequence : Actual Inj Volume : 5 µl  
 Acq. Method : C:\HPCHEM\1\METHODS\ADH-1030.M  
 Last changed : 3/3/2011 9:01:50 AM by JTM  
 Analysis Method : C:\HPCHEM\1\METHODS\AD-0020.M  
 Last changed : 5/3/2011 12:30:35 PM by JTM

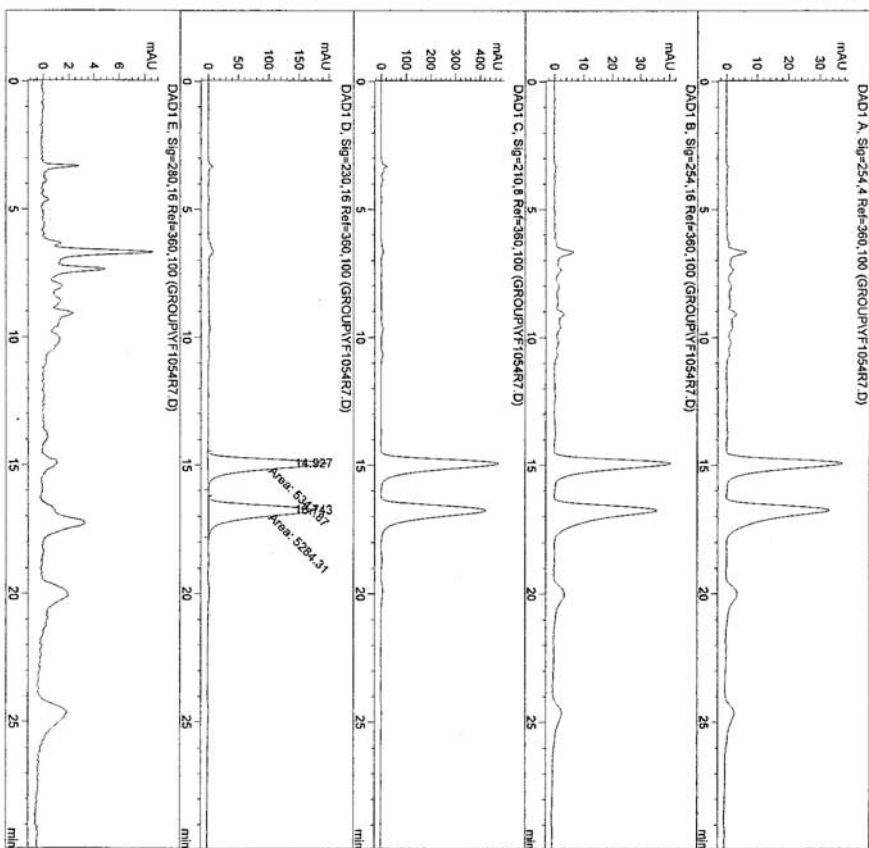

Area Percent Report  
 Sorted By : Signal  
 Multiplier : 1.0000  
 Dilution : 1.0000  
 Use Multiplier & Dilution Factor with ISTDs

| Signal                                   | Retention Time [min] | Width [min] | Area [mAU*s] | Height [mAU] | Area %  |
|------------------------------------------|----------------------|-------------|--------------|--------------|---------|
| Signal 1: DAD1 A, Sig=254,4 Ref=360,100  | 14.927               | 0.4506      | 5347.87061   | 197.79718    | 50.2989 |
| Signal 2: DAD1 B, Sig=254,16 Ref=360,100 | 16.743               | 0.5054      | 5284.30957   | 174.26401    | 49.7011 |
| Signal 3: DAD1 C, Sig=210,8 Ref=360,100  |                      |             |              |              |         |
| Signal 4: DAD1 D, Sig=230,16 Ref=360,100 |                      |             |              |              |         |
| Signal 5: DAD1 E, Sig=280,16 Ref=360,100 |                      |             |              |              |         |
| Totals:                                  |                      |             | 1.06322e4    | 372.06119    |         |

Results obtained with enhanced integrator!

\*\*\* End of Report \*\*\*

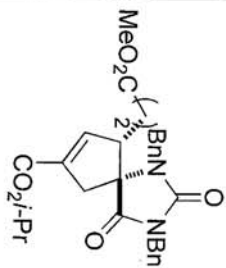

Table 2, entry 6  
 racemic sample

Injection Date : 3/3/2011 10:08:42 AM  
 Sample Name : YFI054 S-cat  
 Acq. Operator : JTM  
 Acq. Instrument : Instrument 1  
 Different Inj Volume from Sequence :  
 Acq. Method : C:\HPCHEM\1\METHODS\ADH-1030.M  
 Last changed : 3/3/2011 9:01:50 AM by JTM  
 Analysis Method : C:\HPCHEM\1\METHODS\AD-0020.M  
 Last changed : 5/3/2011 12:30:35 PM by JTM  
 (modified after loading)

Seq. Line : 3  
 Location : Vial 63  
 Inj : 1  
 Inj Volume : 5 µl

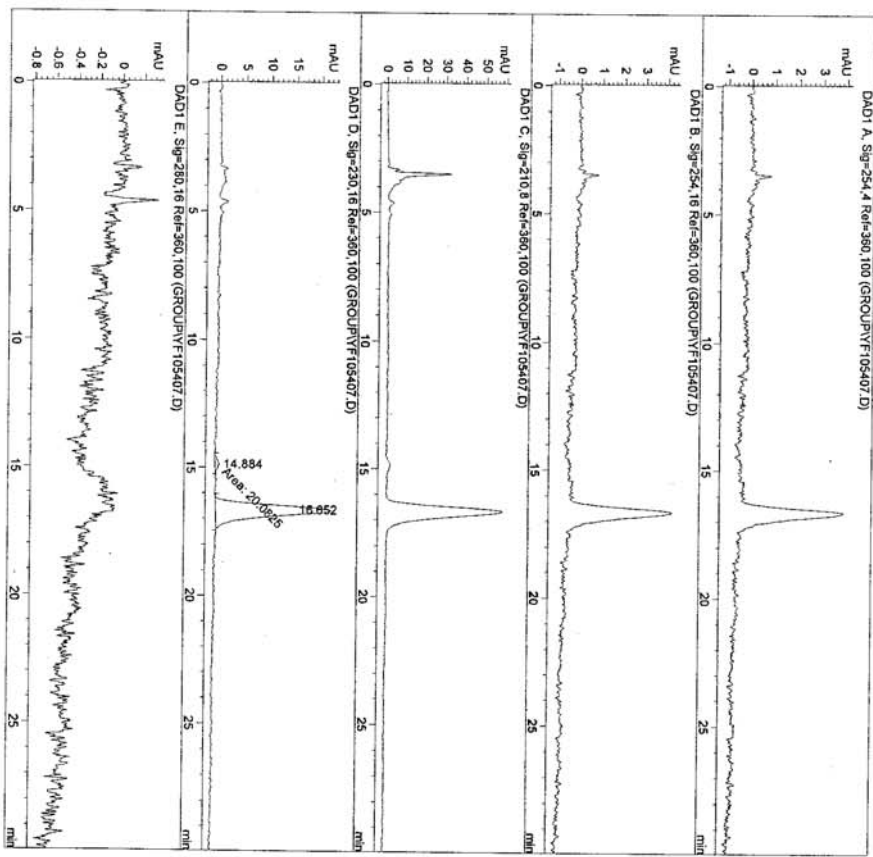

Area Percent Report

Sorted By : Signal  
 Multiplier : 1.0000  
 Dilution : 1.0000  
 Use Multiplier & Dilution Factor with ISTDs

| Signal                                   | Retention Time (min) | Area (mAU*s) | Height (mAU) | Area %  |
|------------------------------------------|----------------------|--------------|--------------|---------|
| Signal 1: DAD1 A, Sig=254.4 Ref=360.100  | 14.884               | 20.08250     | 13498.1      | 3.0016  |
| Signal 2: DAD1 B, Sig=230.16 Ref=360.100 | 14.884               | 20.08250     | 13498.1      | 3.0016  |
| Signal 3: DAD1 C, Sig=210.8 Ref=360.100  | 14.884               | 20.08250     | 13498.1      | 3.0016  |
| Signal 4: DAD1 D, Sig=230.16 Ref=360.100 | 16.652               | 648.96741    | 22.71846     | 96.9984 |
| Totals :                                 |                      | 669.04991    | 23.53381     |         |

Results obtained with enhanced integrator!  
 Signal 5: DAD1 E, Sig=280.16 Ref=360.100

\*\*\* End of Report \*\*\*

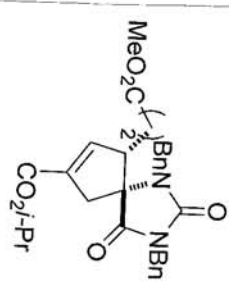

Table 2, entry 6  
 with (S)-catalyst

Injection Date : 3/3/2011 10:40:02 AM  
 Sample Name : YF1081 R-cat  
 Acq. Operator : JTM  
 Instrument : Instrument 1  
 Different Inj Volume from Sequence :  
 Acq. Method : C:\HPCHEM1\METHODS\ADH-1030.M  
 Last changed : 3/3/2011 9:01:50 AM by JTM  
 Analysis Method : C:\HPCHEM1\METHODS\AD-0020.M  
 Last changed : 5/3/2011 12:30:35 PM by JTM

(modified after loading)

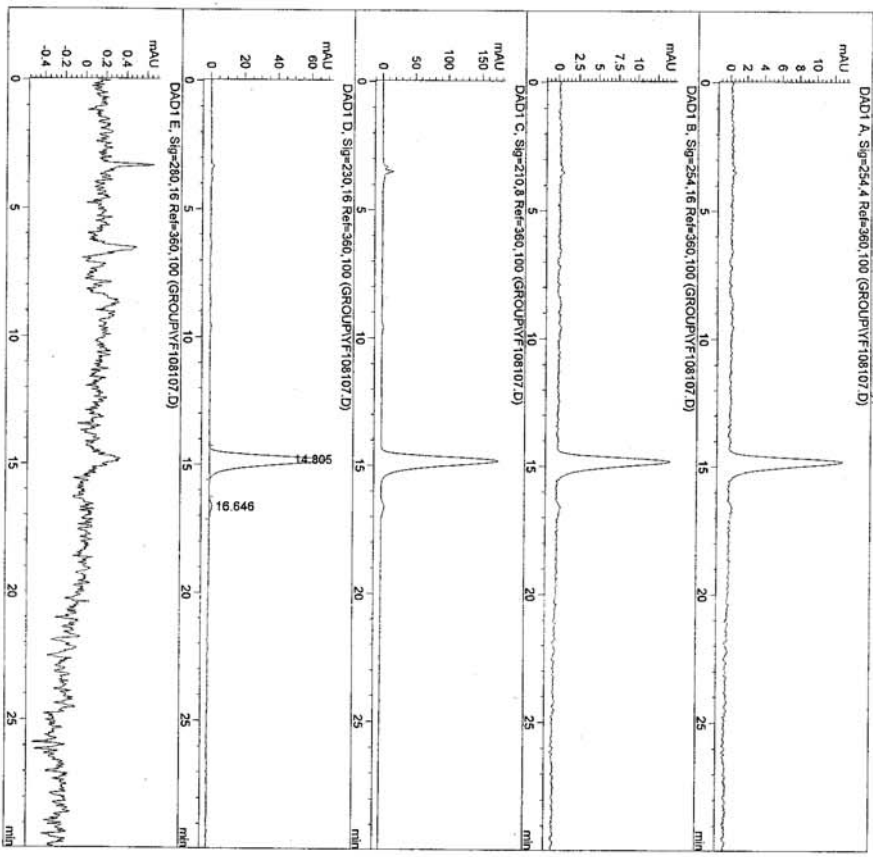

Area Percent Report

Sorted By : Signal  
 Multiplier : 1.0000  
 Dilution : 1.0000  
 Use Multiplier & Dilution Factor with ISTDs

Signal 1: DA01 A, Sig=254.4 Ref=360.100  
 Signal 2: DA01 B, Sig=254.16 Ref=360.100  
 Signal 3: DA01 C, Sig=210.8 Ref=360.100  
 Signal 4: DA01 D, Sig=230.16 Ref=360.100

| Peak #   | RetTime [min] | Type | Width [min] | Area [mAU*s] | Height [mAU] | Area %  |
|----------|---------------|------|-------------|--------------|--------------|---------|
| 1        | 14.805        | VB   | 0.3963      | 1812.85266   | 69.50313     | 97.4552 |
| 2        | 16.646        | PV   | 0.3237      | 47.33741     | 1.78352      | 2.5448  |
| Totals : |               |      |             | 1860.19007   | 71.28664     |         |

Table 2, entry 6  
 with (R)-catalyst

Results obtained with enhanced integrator!  
 Signal 5: DA01 E, Sig=280.16 Ref=360.100  
 \*\*\* End of Report \*\*\*



Acq. Operator : ATP  
 Acq. Instrument : Instrument 1  
 Injection Date : 3/1/2011 4:11:16 AM  
 Seq. Line : 10  
 Location : Vial 10  
 Inj : 1  
 Inj Volume : 1 µl  
 Actual Inj Volume : 3 µl  
 Dilution : 1.0000  
 Use Multiplier & Dilution Factor with ISIDS

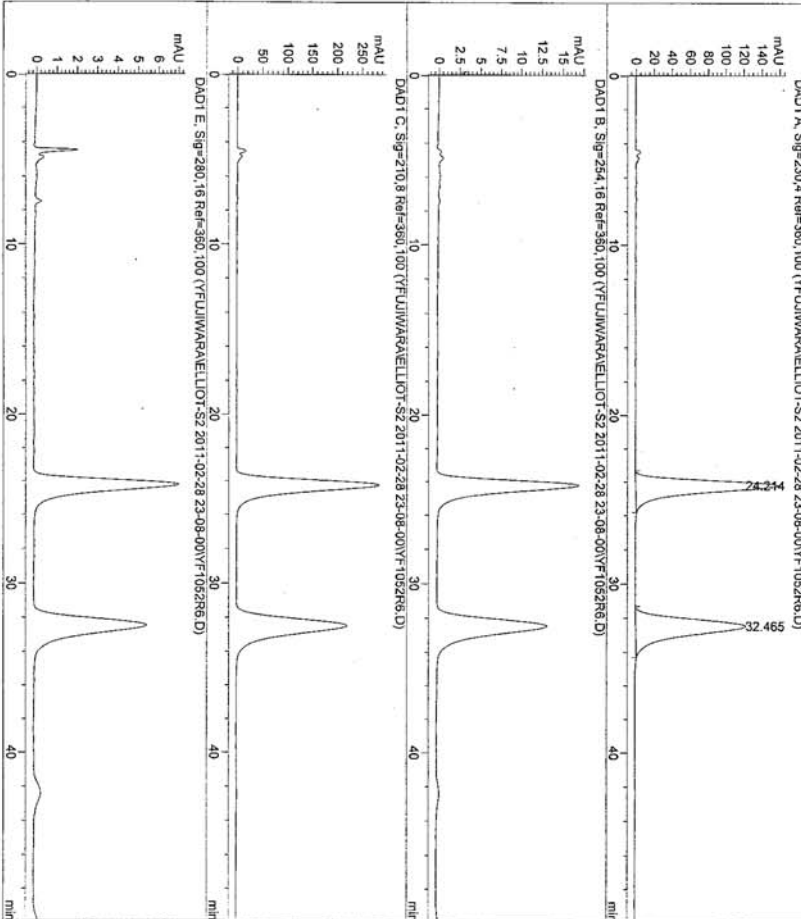

Area Percent Report

Sorted By : Signal  
 Multiplier: : 1.0000  
 Dilution: : 1.0000  
 Use Multiplier & Dilution Factor with ISIDS

| Peak #   | RetTime [min] | Type | Width [min] | Area [mAU*s] | Height [mAU] | Area %  |
|----------|---------------|------|-------------|--------------|--------------|---------|
| 1        | 24.214        | BB   | 0.7386      | 7749.02881   | 158.44400    | 50.1115 |
| 2        | 32.465        | BB   | 0.9519      | 7714.53271   | 122.63400    | 49.8885 |
| Totals : |               |      |             | 1.54636e4    | 281.07800    |         |

Signal 1: DAD1 A, Sig=230,4 Ref=360,100  
 Signal 2: DAD1 B, Sig=254,16 Ref=360,100  
 Signal 3: DAD1 C, Sig=210,8 Ref=360,100  
 Signal 4: DAD1 E, Sig=280,16 Ref=360,100

\*\*\* End of Report \*\*\*

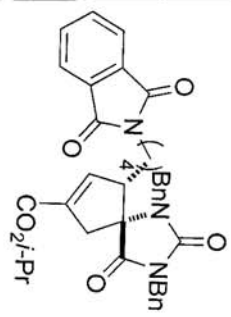

Table 2, entry 7  
 racemic sample

Acq. Operator : ATP  
 Acq. Instrument : Instrument 1  
 Injection Date : 3/1/2011 5:02:35 AM  
 Seq. Line : 11  
 Location : Vial 11  
 Inj : 1

Different Inj Volume from Sequence : Actual Inj Volume : 1 µl  
 Acq. Method : C:\CHEM32\1\DATA\VFUJIMARA\ELLIOT-S2 2011-02-28 23-08-00\AD-H25-50.M  
 Last changed : 2/26/2011 9:40:59 AM by ATP  
 Analysis Method : C:\CHEM32\1\METHODS\AD-H05-30.M  
 Last changed : 2/28/2011 12:54:42 PM by ATP

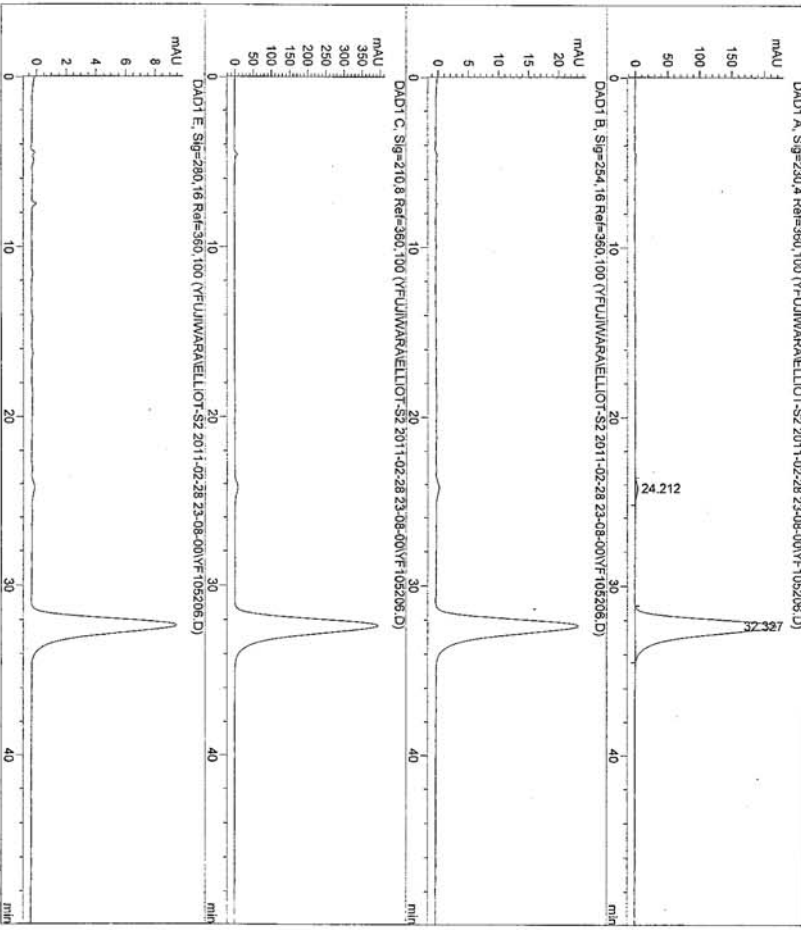

Area Percent Report

Sorted By : Signal  
 Multiplier: : 1.0000  
 Dilution: : 1.0000  
 Use Multiplier & Dilution Factor with ISTDs

Signal 1: DAD1 A, Sig=230,4 Ref=360,100

| Peak #   | RetTime [min] | Type | Width [min] | Area [mAU*s] | Height [mAU] | Area %  |
|----------|---------------|------|-------------|--------------|--------------|---------|
| 1        | 24.212        | BB   | 0.5537      | 195.58586    | 4.29127      | 1.3787  |
| 2        | 32.327        | BB   | 0.9760      | 1.39902e4    | 218.78810    | 98.6213 |
| Totals : |               |      |             | 1.41858e4    | 223.07937    |         |

Signal 2: DAD1 B, Sig=254,16 Ref=360,100  
 Signal 3: DAD1 C, Sig=210,8 Ref=360,100  
 Signal 4: DAD1 E, Sig=280,16 Ref=360,100

\*\*\* End of Report \*\*\*

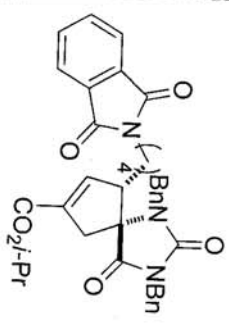

Table 2, entry 7  
 with (S)-catalyst

Acq. Operator : ATP  
 Acq. Instrument : Instrument 1  
 Injection Date : 3/1/2011 5:53:48 AM  
 Seg. Line : 12  
 Location : Vial 12  
 Inj : 1  
 Inj Volume : 1 µl  
 Actual Inj Volume : 3 µl  
 Acq. Method : C:\CHEM32\1\DATA\FUJIMARA\ELLIOT-S2 2011-02-28 23-08-00\AD-H25-50.M  
 Last Changed : 2/26/2011 9:40:59 AM by ATP  
 Analysis Method : C:\CHEM32\1\METHODS\AD-H05-30.M  
 Last Changed : 2/28/2011 12:54:42 PM by ATP

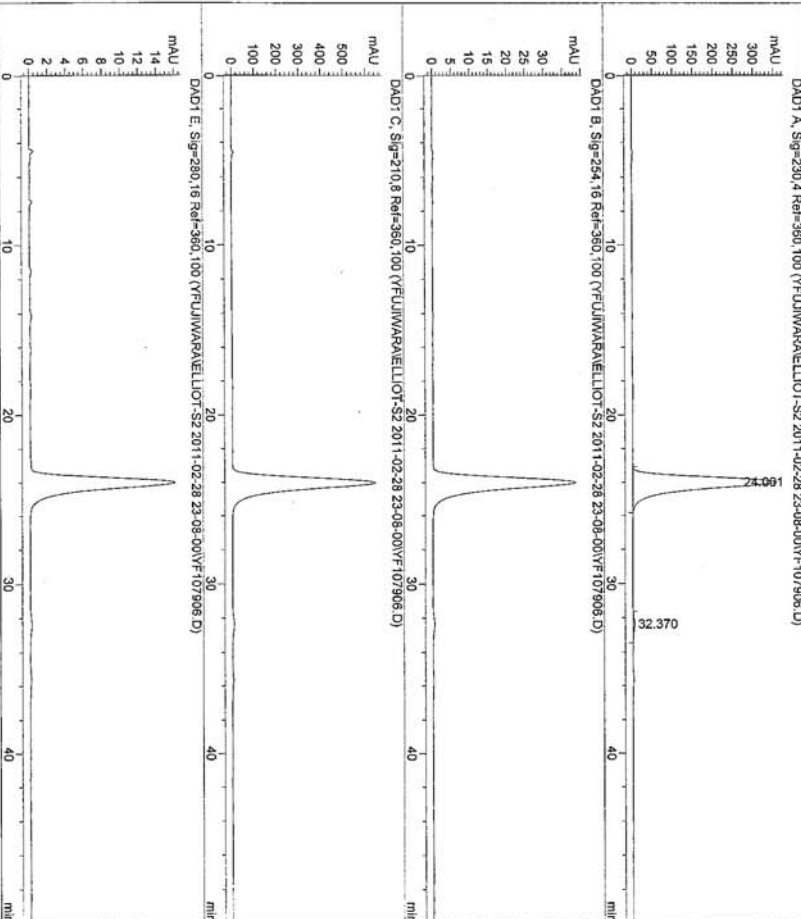

Area Percent Report

Sorted By : Signal  
 Multiplier: : 1.0000  
 Dilution: : 1.0000  
 Use Multiplier & Dilution Factor with ISTDs

Signal 1: DAD1 A, Sig=230.4 Ref=360.100

| Peak #   | RetTime [min] | Type | Width [min] | Area [mAU*s] | Height [mAU] | Area %  |
|----------|---------------|------|-------------|--------------|--------------|---------|
| 1        | 24.001        | BB   | 0.7426      | 1.73538e4    | 356.09384    | 98.8965 |
| 2        | 32.370        | BB   | 0.6360      | 193.64005    | 3.63190      | 1.1035  |
| Totals : |               |      |             | 1.75475e4    | 359.72564    |         |

Table 2, entry 7  
 with (R)-catalyst

Signal 2: DAD1 B, Sig=254.16 Ref=360.100  
 Signal 3: DAD1 C, Sig=210.8 Ref=360.100  
 Signal 4: DAD1 E, Sig=280.16 Ref=360.100

\*\*\* End of Report \*\*\*

Injection Date : 3/3/2011 5:09:31 AM  
 Sample Name : VF1055 RAC  
 Acq. Operator : JTM  
 Acq. Instrument : Instrument 1  
 Different Inj Volume from Sequence : Actual Inj Volume : 5 µl  
 Acq. Method : C:\HPCHEM\1\METHODS\VC-3040.M  
 Last changed : 3/2/2011 10:08:40 PM by JTM  
 Analysis Method : C:\HPCHEM\1\METHODS\ADH-1020.M  
 Last changed : 3/2/2011 10:10:29 PM by JTM

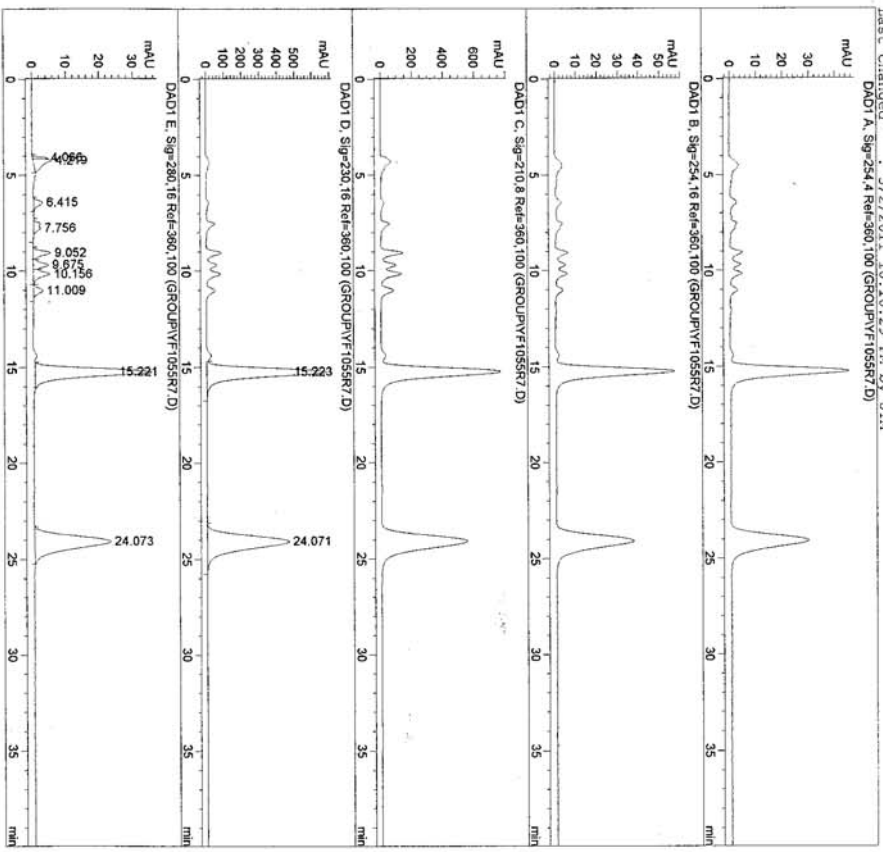

Area Percent Report  
 Sorted By : Signal  
 Multiplier : 1.0000  
 Dilution :  
 Use Multiplier & Dilution Factor with ISTDs

| Signal                                   | Peak # | RetTime [min] | Type | Width [min] | Area [mAU*s] | Height [mAU] | Area %  |
|------------------------------------------|--------|---------------|------|-------------|--------------|--------------|---------|
| Signal 1: DAD1 A, Sig=254, 4 Ref=360,100 | 1      | 15.223        | VB   | 0.4830      | 2.11890e4    | 680.99597    | 49.2733 |
|                                          | 2      | 24.071        | BB   | 0.7298      | 2.18140e4    | 464.59079    | 50.7267 |
| Totals :                                 |        |               |      |             | 4.30030e4    | 1145.58676   |         |
| Signal 2: DAD1 B, Sig=254,16 Ref=360,100 |        |               |      |             |              |              |         |
| Signal 3: DAD1 C, Sig=210,8 Ref=360,100  |        |               |      |             |              |              |         |
| Signal 4: DAD1 D, Sig=230,16 Ref=360,100 |        |               |      |             |              |              |         |
| Signal 5: DAD1 E, Sig=280,16 Ref=360,100 |        |               |      |             |              |              |         |

Results obtained with enhanced integrator:

| Peak #   | RetTime [min] | Type | Width [min] | Area [mAU*s] | Height [mAU] | Area %  |
|----------|---------------|------|-------------|--------------|--------------|---------|
| 1        | 4.066         | EV   | 0.1040      | 30.14036     | 4.39330      | 1.1480  |
| 2        | 4.218         | VB   | 0.2682      | 114.53835    | 3.36414      | 4.3625  |
| 3        | 6.415         | BB   | 0.2701      | 53.75902     | 2.65620      | 2.0475  |
| 4        | 7.756         | PP   | 0.3575      | 61.82261     | 2.08771      | 2.3547  |
| 5        | 9.052         | BV   | 0.2642      | 90.52500     | 5.17082      | 3.4479  |
| 6        | 9.675         | VV   | 0.2540      | 82.54912     | 4.45956      | 3.1441  |
| 7        | 10.156        | VB   | 0.2772      | 96.98419     | 4.89322      | 3.6939  |
| 8        | 11.009        | BB   | 0.2677      | 58.52027     | 2.84825      | 2.2289  |
| 9        | 15.221        | PP   | 0.4461      | 1002.95801   | 34.81258     | 38.2001 |
| 10       | 24.073        | BB   | 0.6293      | 1033.73816   | 22.78539     | 39.3725 |
| Totals : |               |      |             | 2625.53508   | 89.67117     |         |

Results obtained with enhanced integrator!

\*\*\* End of Report \*\*\*

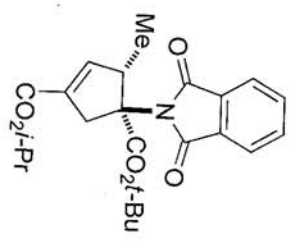

Table 3, entry 1  
 racemic sample

Injection Date : 3/3/2011 5:50:47 AM  
 Sample Name : YF1055 S-cat  
 Acq. Operator : JTM  
 Acq. Instrument : Instrument 1  
 Different Inj Volume from Sequence : Actual Inj Volume : 5 µl  
 Acq. Method : C:\HPCHEM\1\METHODS\IC-3040.M  
 Last changed : 3/2/2011 10:08:40 PM by JTM  
 Analysis Method : C:\HPCHEM\1\METHODS\ADH-1020.M  
 Analyst : JTM  
 Last changed : 3/2/2011 10:10:29 PM by JTM  
 Sample Name : YF1055 S-cat

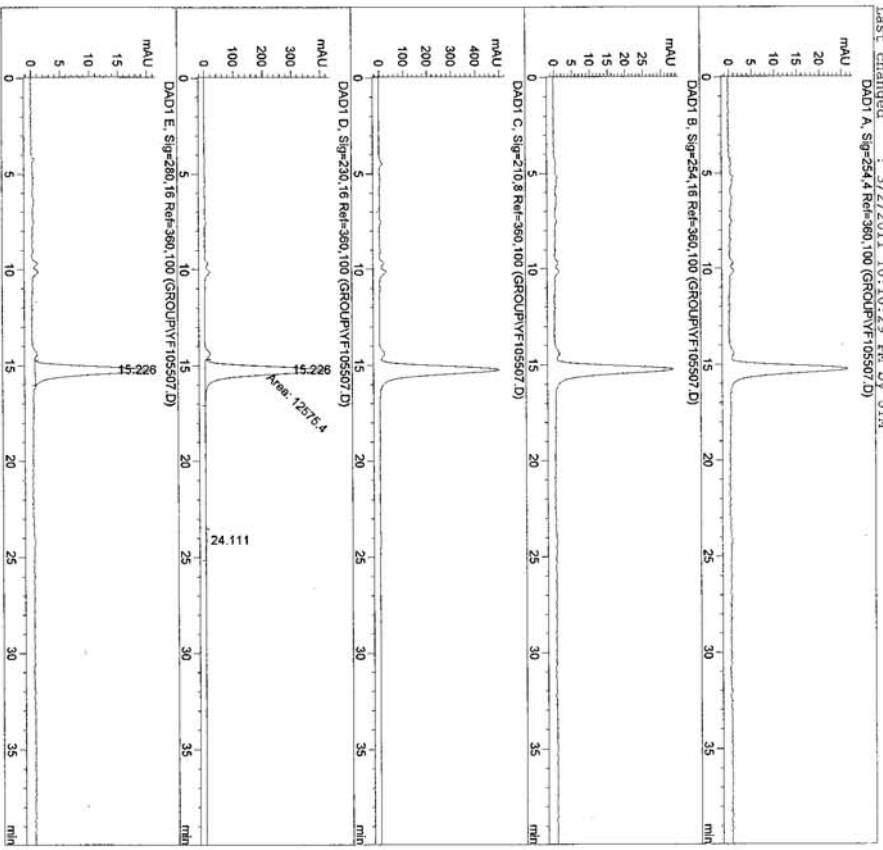

Area Percent Report  
 Sorted By : Signal  
 Multiplier : 1.0000  
 Dilution : 1.0000  
 Use Multiplier & Dilution Factor with ISMS

| Signal                                   | Peak #                                     | RetTime [min] | Type | Width [min] | Area [mAU*s] | Height [mAU] | Area %   |
|------------------------------------------|--------------------------------------------|---------------|------|-------------|--------------|--------------|----------|
| Signal 1: DAD1 A, Sig=234, 4 Ref=360,100 | 1                                          | 15.226        | PM   | 0.5056      | 1.2575464    | 414.52951    | 98.9273  |
| Signal 2: DAD1 B, Sig=234,16 Ref=360,100 | 2                                          | 24.111        | BP   | 0.5213      | 136.36325    | 3.11167      | 1.0727   |
| Signal 3: DAD1 C, Sig=210, 8 Ref=360,100 | Totals : 1.27118e4 417.64118               |               |      |             |              |              |          |
| Signal 4: DAD1 D, Sig=230,16 Ref=360,100 | Results obtained with enhanced integrator: |               |      |             |              |              |          |
| Signal 5: DAD1 E, Sig=280,16 Ref=360,100 | Results obtained with enhanced integrator: |               |      |             |              |              |          |
|                                          | Peak #                                     | RetTime [min] | Type | Width [min] | Area [mAU*s] | Height [mAU] | Area %   |
|                                          | 1                                          | 15.226        | PM   | 0.4305      | 571.15997    | 19.91845     | 100.0000 |
|                                          | Totals : 571.15997 19.91845                |               |      |             |              |              |          |

\*\*\* End of Report \*\*\*

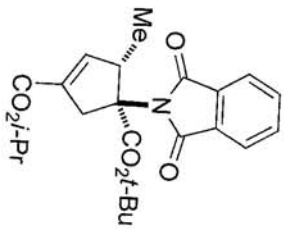

Table 3, entry 1  
 with (S)-catalyst

Injection Date : 3/3/2011 6:32:03 AM  
 Sample Name : YF1082 R-cat  
 Acq. Operator : JTM  
 Acq. Instrument : Instrument 1  
 Different Inj Volume from Sequence : Actual Inj Volume : 5 µl  
 Acq. Method : C:\HECHEM\1\METHODS\IC-3040.M  
 Acq. Method : 3/2/2011 10:08:40 PM by JTM  
 Analysis Method : C:\HECHEM\1\METHODS\ADH-1020.M  
 Last changed : 3/2/2011 10:10:29 PM by JTM  
 Last changed : DAD1 A, Sig=254,4 Ref=360,100 (GROUP\YF108207.D)

Seq. Line : 15  
 Location : Vial 61  
 Inj : 1  
 Inj Volume : 5 µl

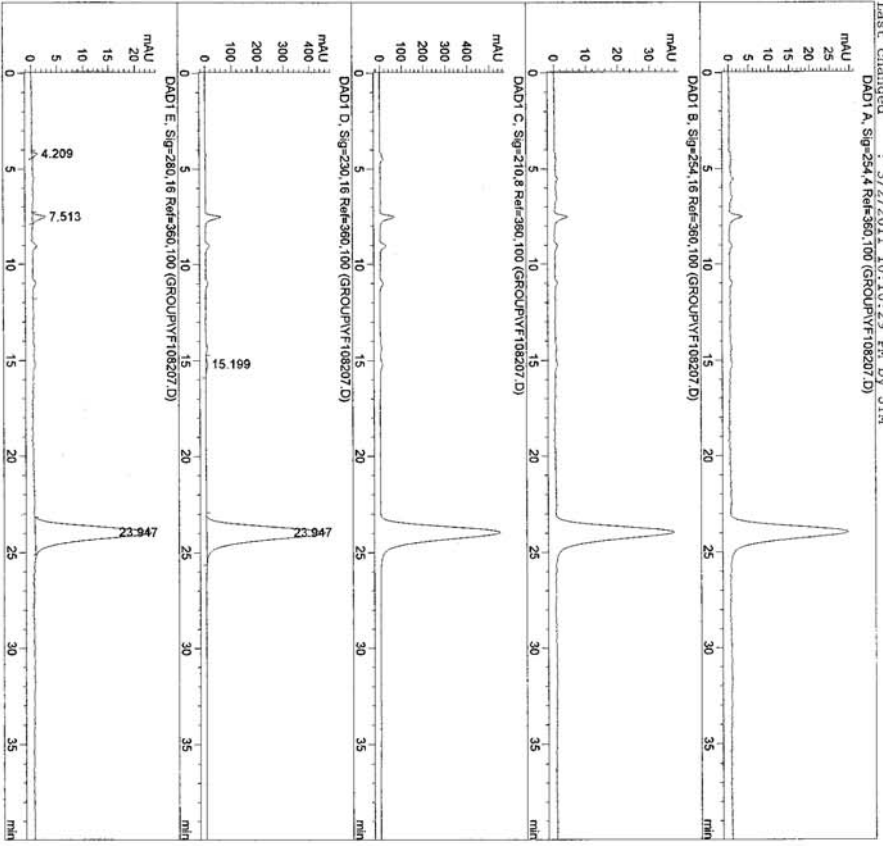

Area Percent Report  
 Sorted By : Signal  
 Multiplier : 1.0000  
 Dilution : 1.0000  
 Use Multiplier & Dilution Factor with ISTDs

Signal 1: DAD1 A, Sig=254,4 Ref=360,100

Signal 2: DAD1 B, Sig=254,16 Ref=360,100

Signal 3: DAD1 C, Sig=210,8 Ref=360,100

Signal 4: DAD1 D, Sig=230,16 Ref=360,100

| Peak #   | RetTime [min] | Type | Width [min] | Area [mAU*s] | Height [mAU] | Area %  |
|----------|---------------|------|-------------|--------------|--------------|---------|
| 1        | 4.209         | VB   | 0.4034      | 220.70259    | 7.32709      | 1.0262  |
| 2        | 7.513         | BB   | 0.7194      | 2.1286764    | 458.71677    | 98.9738 |
| Totals : |               |      |             | 2.15074e4    | 466.04386    |         |

Table 3, entry 1  
 with (R)-catalyst

Results obtained with enhanced integrator:

Signal 5: DAD1 E, Sig=280,16 Ref=360,100

| Peak #   | RetTime [min] | Type | Width [min] | Area [mAU*s] | Height [mAU] | Area %  |
|----------|---------------|------|-------------|--------------|--------------|---------|
| 1        | 4.209         | FB   | 0.1711      | 12.81015     | 1.12246      | 1.2004  |
| 2        | 7.513         | BB   | 0.2204      | 39.69534     | 2.53864      | 3.7198  |
| 3        | 23.947        | BB   | 0.6220      | 1014.62317   | 22.50602     | 95.0797 |
| Totals : |               |      |             | 1067.12865   | 26.16712     |         |

Results obtained with enhanced integrator!  
 \*\*\* End of Report \*\*\*

Acq. Operator : ATP  
 Acq. Instrument : Instrument 1  
 Injection Date : 2/28/2011 1:20:07 PM  
 Location : Vial 21  
 Inj Volume : 1 µl  
 Inj Volume : 3 µl  
 Actual Inj Volume : 3 µl  
 Different Inj Volume from Sequence :  
 Last Method : C:\CHEM32\1\DATA\FEUIWARRA\ELLIOT-S2 2011-02-28 10-07-11\YF1102R5.D  
 Last Changed : 2/26/2011 9:31:41 AM by ATP  
 Analysis Method : C:\CHEM32\1\METHODS\AD-H03-30.M  
 Last changed : 2/28/2011 12:54:42 PM by ATP

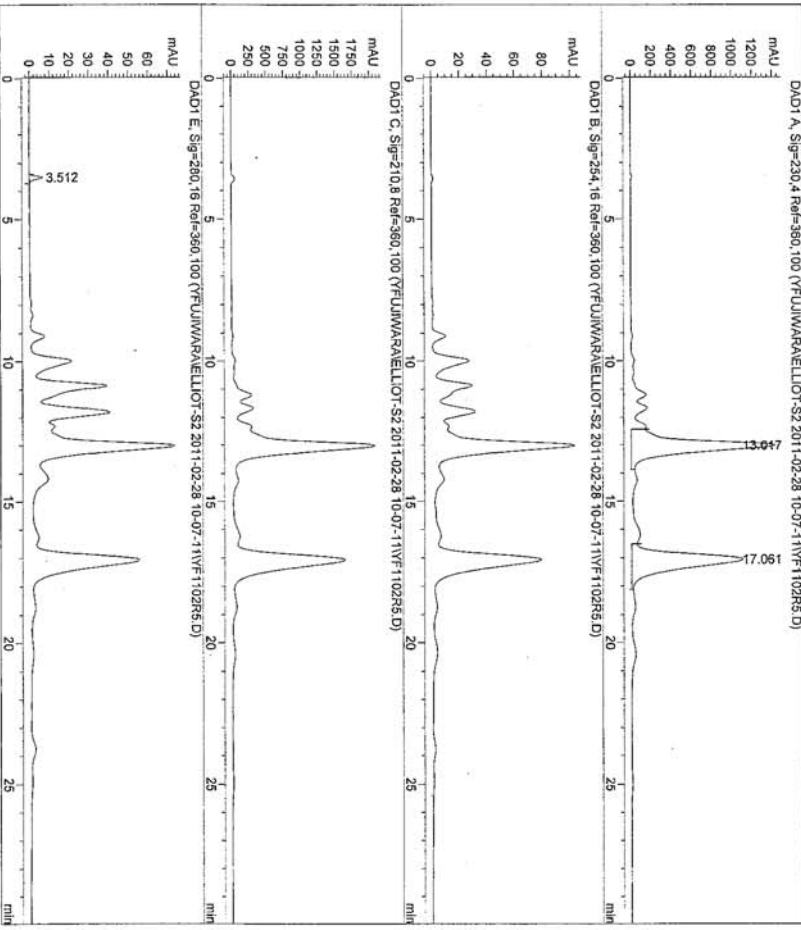

Area Percent Report  
 Sorted By : Signal  
 Multiplier: 1.0000  
 Dilution: 1.0000  
 Use Multiplier & Dilution Factor with ISTDs

| Peak #   | RetTime [min] | Type | Width [min] | Area [mAU*s] | Height [mAU] | Area %  |
|----------|---------------|------|-------------|--------------|--------------|---------|
| 1        | 13.017        | VV   | 0.4267      | 4.11534e4    | 1426.09290   | 51.9759 |
| 2        | 17.061        | VV   | 0.5132      | 3.80244e4    | 1111.35950   | 48.0241 |
| Totals : |               |      |             | 7.91779e4    | 2537.45239   |         |

Signal 1: DAD1 A, Sig=230,4 Ref=360,100  
 Signal 2: DAD1 B, Sig=254,16 Ref=360,100  
 Signal 3: DAD1 C, Sig=210,8 Ref=360,100  
 Signal 4: DAD1 E, Sig=280,16 Ref=360,100

\*\*\* End of Report \*\*\*

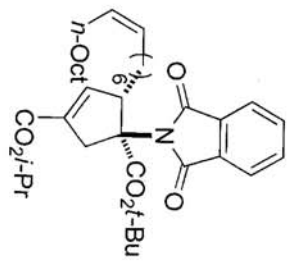

Table 3, entry 2  
 racemic sample

Acq. Operator : ATP  
 Acq. Instrument : Instrument 1  
 Injection Date : 2/28/2011 1:51:26 PM  
 Seq. Line : 7  
 Location : Vial 22  
 Inj Volume : 1 µl  
 Inj Volume from Sequence : Actual Inj Volume : 10 µl  
 Acq. Method : C:\CHEM32\1\DATA\YFUJIWARA\ELLIOT-S2 2011-02-28 10-07-11\AD-H01-30.M  
 Last changed : 2/26/2011 9:31:41 AM by ATP  
 Analysis Method : C:\CHEM32\1\METHODS\AD-H03-30.M  
 Last changed : 2/28/2011 12:54:42 PM by ATP

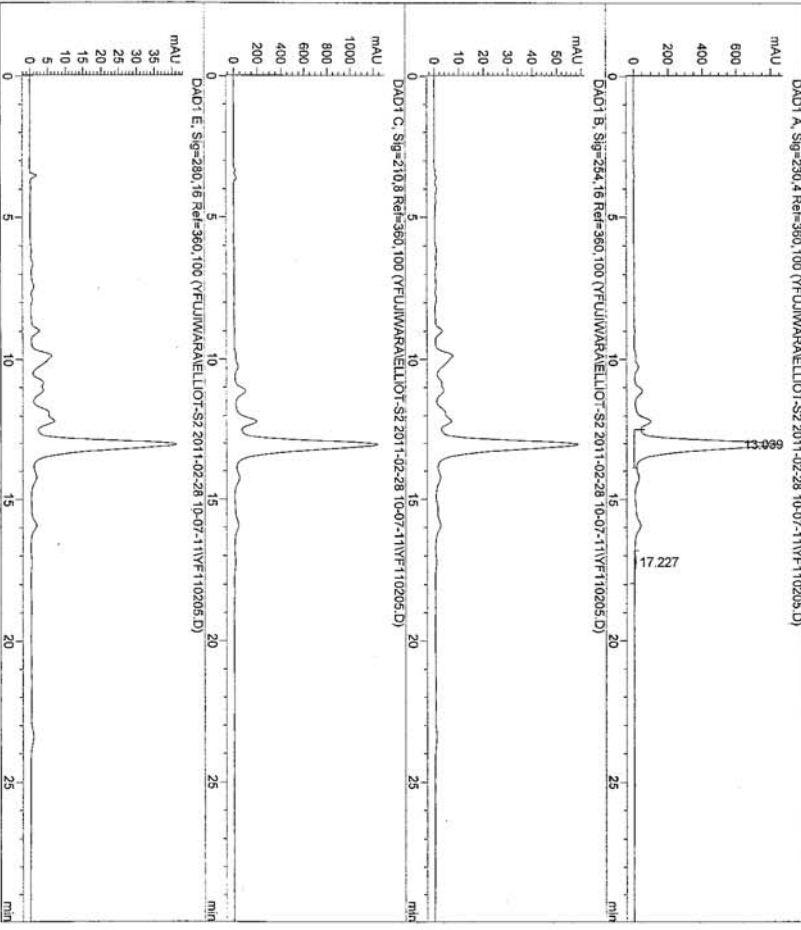

Area Percent Report

| Sorted By                                   | Signal        |      |             |              |              |         |
|---------------------------------------------|---------------|------|-------------|--------------|--------------|---------|
| Multiplier:                                 | 1.0000        |      |             |              |              |         |
| Dilution:                                   | 1.0000        |      |             |              |              |         |
| Use Multiplier & Dilution Factor with ISTDs |               |      |             |              |              |         |
| Signal 1: DAD1 A, Sig=230.4 Ref=360.100     |               |      |             |              |              |         |
| Peak #                                      | RetTime [min] | Type | Width [min] | Area [mAU*s] | Height [mAU] | Area %  |
| 1                                           | 13.039        | VV   | 0.3903      | 2.14791e4    | 828.97296    | 98.8464 |
| 2                                           | 17.227        | VB   | 0.4734      | 250.67580    | 8.04837      | 1.1536  |
| Totals :                                    |               |      |             | 2.17298e4    | 837.02133    |         |

Signal 2: DAD1 B, Sig=254.16 Ref=360.100  
 Signal 3: DAD1 C, Sig=210.8 Ref=360.100  
 Signal 4: DAD1 E, Sig=280.16 Ref=360.100

\*\*\* End of Report \*\*\*

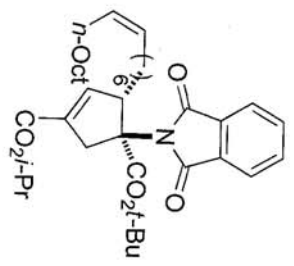

Table 3, entry 2  
 with (S)-catalys  
 Before prep HPLC  
 purification



Acq. Operator : ARP  
 Acq. Instrument : Instrument 1  
 Injection Date : 2/28/2011 2:22:49 PM  
 Sed. Line : 8  
 Location : Vial 23  
 Inj Volume : 1 µl  
 Actual Inj Volume : 3 µl  
 Inj Volume : 1 µl  
 Dilution : 1.0000  
 Use Multiplier & Dilution Factor with ISTDs

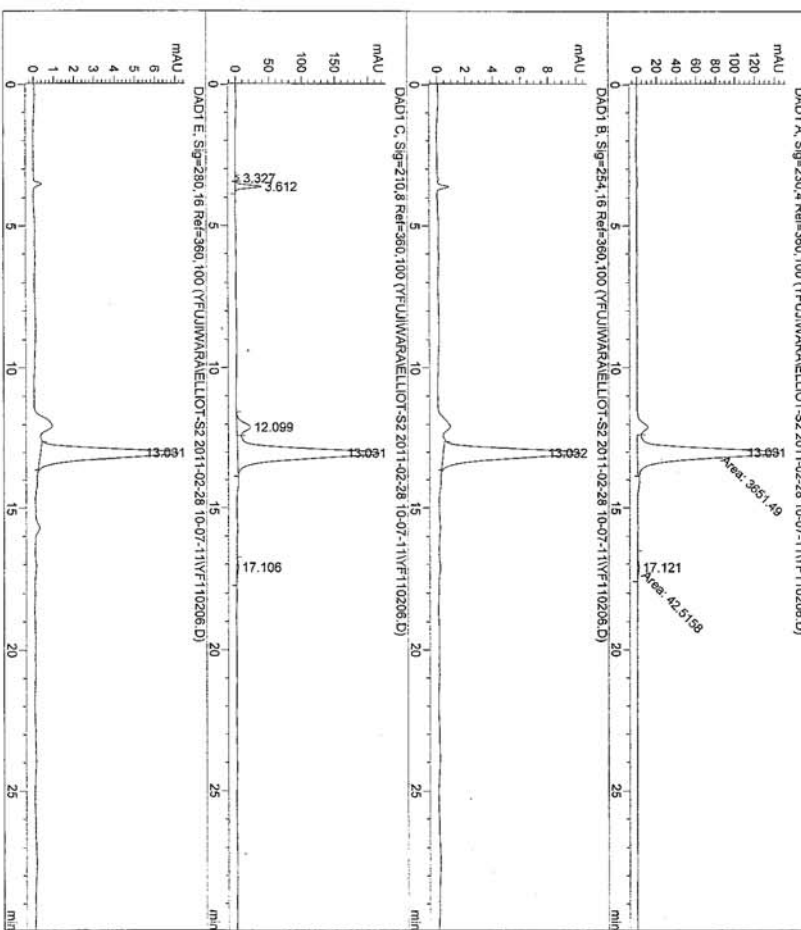

Area Percent Report

| Sorted By | Signal    | Multiplier | Dilution |
|-----------|-----------|------------|----------|
| 1         | 13.031 MF | 0.4219     | 1.0000   |
| 2         | 17.121 MM | 0.5224     | 1.0000   |

| Signal 1: DAD1 A, Sig=230,4 Ref=360,100 | Peak RetTime [min] | Type      | Width [min] | Area [mAU*s] | Height [mAU] | Area %  |
|-----------------------------------------|--------------------|-----------|-------------|--------------|--------------|---------|
| Totals :                                | 1                  | 13.031 MF | 0.4219      | 3651.49316   | 144.26373    | 98.8491 |
|                                         | 2                  | 17.121 MM | 0.5224      | 42.51578     | 1.35652      | 1.1509  |
| Totals :                                |                    |           |             | 3694.00894   | 145.62026    |         |

After prep HPLC purification

| Signal 2: DAD1 B, Sig=254,16 Ref=360,100 | Peak RetTime [min] | Type      | Width [min] | Area [mAU*s] | Height [mAU] | Area %   |
|------------------------------------------|--------------------|-----------|-------------|--------------|--------------|----------|
| Totals :                                 | 1                  | 13.032 BB | 0.3628      | 232.70863    | 9.87988      | 100.0000 |
|                                          | Totals :           |           |             | 232.70863    | 9.87988      |          |

| Signal 3: DAD1 C, Sig=210,8 Ref=360,100 | Peak RetTime [min] | Type      | Width [min] | Area [mAU*s] | Height [mAU] | Area %  |
|-----------------------------------------|--------------------|-----------|-------------|--------------|--------------|---------|
| Totals :                                | 1                  | 3.327 BV  | 0.0994      | 41.46928     | 6.41283      | 0.6728  |
|                                         | 2                  | 3.612 VB  | 0.1166      | 296.33112    | 39.02552     | 4.8077  |
|                                         | 3                  | 12.099 BV | 0.3427      | 457.83014    | 20.17720     | 7.4278  |
|                                         | 4                  | 13.031 VB | 0.3781      | 5319.20215   | 213.94739    | 86.2987 |
|                                         | 5                  | 17.106 BB | 0.3337      | 48.87917     | 1.82966      | 0.7930  |
| Totals :                                |                    |           |             | 6163.71185   | 281.39260    |         |

| Signal 4: DAD1 E, Sig=280,16 Ref=360,100 | Peak RetTime [min] | Type      | Width [min] | Area [mAU*s] | Height [mAU] | Area %   |
|------------------------------------------|--------------------|-----------|-------------|--------------|--------------|----------|
| Totals :                                 | 1                  | 13.031 BB | 0.3533      | 159.41580    | 6.80607      | 100.0000 |
|                                          | Totals :           |           |             | 159.41580    | 6.80607      |          |

Acq. Operator : ATP  
 Acq. Instrument : Instrument 1  
 Injection Date : 2/28/2011 2:54:09 PM  
 Seq. Line : 9  
 Location : Vial 24  
 Inj : 1  
 Inj Volume : 1 µl  
 Actual Inj Volume : 10 µl  
 Dilution: : 1.0000  
 Use Multiplier & Dilution Factor with ISTDs

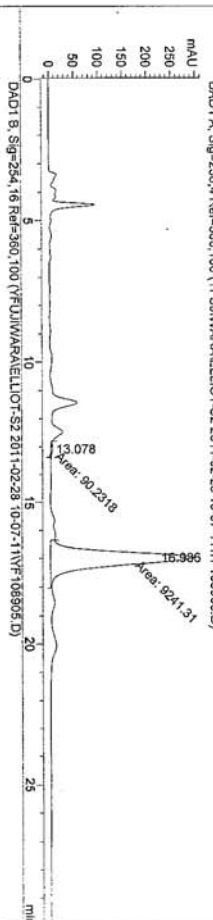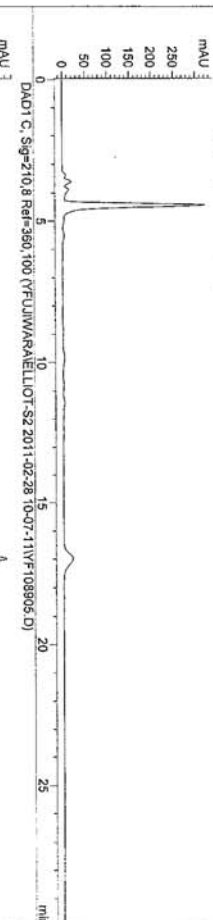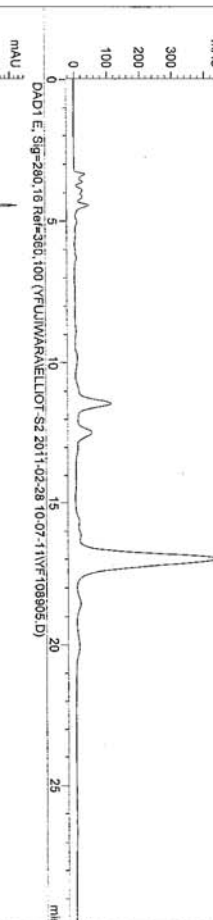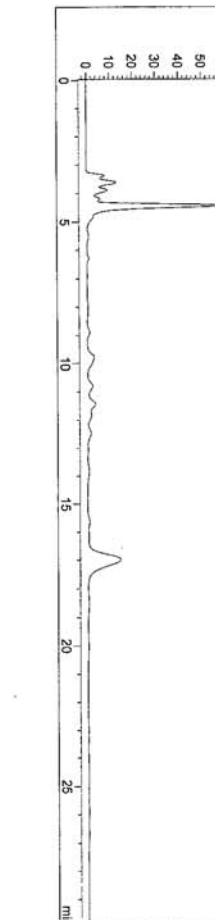

Area Percent Report

Sorted By : Signal  
 Multiplier: : 1.0000  
 Dilution: : 1.0000  
 Use Multiplier & Dilution Factor with ISTDs

| Peak #   | RetTime [min] | Type | Width [min] | Area [mAU*s] | Height [mAU] | Area %  |
|----------|---------------|------|-------------|--------------|--------------|---------|
| 1        | 13.078        | RM   | 0.4284      | 90.23175     | 3.51029      | 0.9670  |
| 2        | 16.986        | RM   | 0.5209      | 9241.30566   | 295.70801    | 99.0330 |
| Totals : |               |      |             | 9331.53741   | 299.21830    |         |

Signal 1: DAD1 A, Sig=230.4, Ref=360.100

Signal 2: DAD1 B, Sig=254.16, Ref=360.100

Signal 3: DAD1 C, Sig=210.8, Ref=360.100

Signal 4: DAD1 E, Sig=280.16, Ref=360.100

\*\*\* End of Report \*\*\*

Table 3, entry 2  
 with (R)-catalyst  
 Before prep HPLC  
 purification

Acq. Operator : ATP  
 Acq. Instrument : Instrument 1  
 Injection Date : 2/28/2011 3:25:30 PM  
 Seq. Line : 10  
 Location : Vial 25  
 Inj Volume : 1 µl  
 Inj Volume from Sequence : Actual Inj Volume : 3 µl  
 Acq. Method : C:\CHEM32\1\DATA\YFUJIMARA\ELLIOT-S2 2011-02-28 10-07-11\AD-H01-30.M  
 Last changed : 2/26/2011 9:31:41 AM by ATP  
 Analysis Method : C:\CHEM32\1\METHODS\AD-H05-30.M  
 Last changed : 2/28/2011 12:54:42 PM by ATP

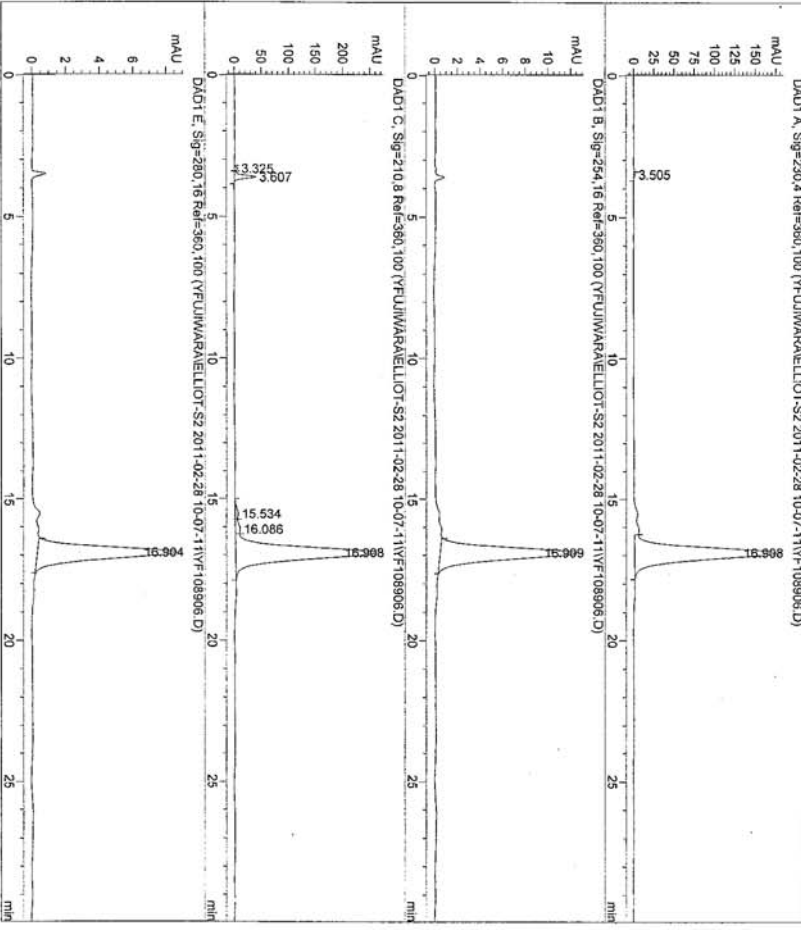

Area Percent Report

Sorted By : Signal  
 Multiplier: : 1.0000  
 Dilution: : 1.0000  
 Use Multiplier & Dilution Factor with ISTDs

| Peak #                                  | RetTime [min] | Type | Width [min] | Area [mAU*s] | Height [mAU] | Area %  |
|-----------------------------------------|---------------|------|-------------|--------------|--------------|---------|
| Signal 1: DAD1 A, sig=230,4 Ref=360,100 |               |      |             |              |              |         |
| 1                                       | 3.505         | VB   | 0.1292      | 12.88167     | 1.51572      | 0.2469  |
| 2                                       | 16.908        | VB   | 0.4554      | 5204.52979   | 174.76656    | 99.7531 |
| Totals :                                |               |      |             | 5217.41146   | 176.28228    |         |

| Peak #                                   | RetTime [min] | Type | Width [min] | Area [mAU*s] | Height [mAU] | Area %   |
|------------------------------------------|---------------|------|-------------|--------------|--------------|----------|
| Signal 2: DAD1 B, sig=254,16 Ref=360,100 |               |      |             |              |              |          |
| 1                                        | 16.909        | BB   | 0.4355      | 344.60764    | 12.05645     | 100.0000 |
| Totals :                                 |               |      |             | 344.60764    | 12.05645     |          |

| Peak #                                  | RetTime [min] | Type | Width [min] | Area [mAU*s] | Height [mAU] | Area %  |
|-----------------------------------------|---------------|------|-------------|--------------|--------------|---------|
| Signal 3: DAD1 C, sig=210,8 Ref=360,100 |               |      |             |              |              |         |
| 1                                       | 3.325         | BV   | 0.0964      | 37.07005     | 5.97647      | 0.4371  |
| 2                                       | 3.607         | VB   | 0.1162      | 305.81046    | 39.53893     | 3.6055  |
| 3                                       | 15.534        | BV   | 0.3472      | 139.89638    | 5.68369      | 1.6494  |
| 4                                       | 16.086        | VV   | 0.3578      | 226.79286    | 9.19258      | 2.6739  |
| 5                                       | 16.908        | VB   | 0.4566      | 7772.15869   | 260.14874    | 91.6341 |
| Totals :                                |               |      |             | 8481.72844   | 320.54052    |         |

| Peak #                                   | RetTime [min] | Type | Width [min] | Area [mAU*s] | Height [mAU] | Area %   |
|------------------------------------------|---------------|------|-------------|--------------|--------------|----------|
| Signal 4: DAD1 E, sig=280,16 Ref=360,100 |               |      |             |              |              |          |
| 1                                        | 16.904        | BB   | 0.4366      | 237.20107    | 8.32063      | 100.0000 |
| Totals :                                 |               |      |             | 237.20107    | 8.32063      |          |

Table 3, entry 2  
 with (R)-catalyst  
 After prep HPLC  
 purification

Injection Date : 2/26/2011 12:04:03 PM  
 Sample Name : VF1056 RAC  
 Acq. Operator : JTM  
 Acq. Instrument : Instrument 1  
 Different Inj Volume from Sequence : Actual Inj Volume : 5 µl  
 Acq. Method : C:\HPCHEM\1\METHODS\VIC-3040.M  
 Last changed : 2/4/2011 9:13:33 PM by JTM  
 Analysis Method : C:\HPCHEM\1\METHODS\MSH-1010.M  
 Last changed : 2/26/2011 5:42:06 PM by JTM

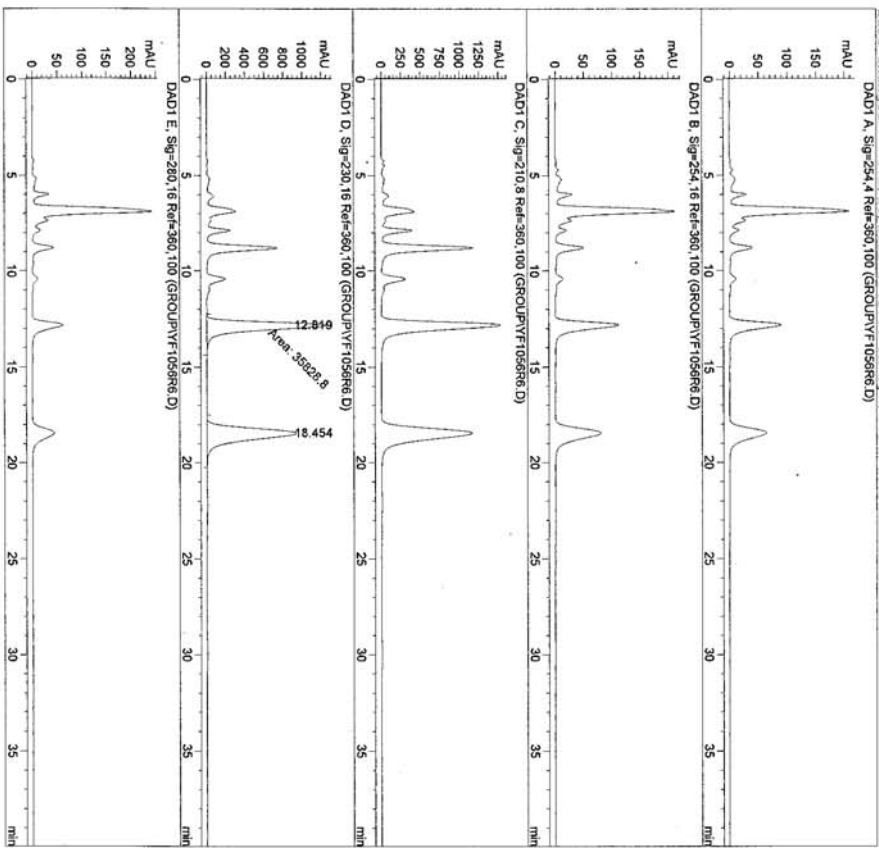

Area Percent Report

Sorted By : Signal  
 Multiplier : 1.0000  
 Dilution : 1.0000  
 Use Multiplier & Dilution Factor with ISTDs

| Signal                                   | Retention Time (min)                       | Width (min) | Area (mAU*s) | Height (mAU) | Area %  |
|------------------------------------------|--------------------------------------------|-------------|--------------|--------------|---------|
| Signal 1: DAD1 A, Sig=254, 4 Ref=360,100 | 12.819                                     | 0.4752      | 3.58288e4    | 1256.57361   | 48.4542 |
| Signal 2: DAD1 B, Sig=254,16 Ref=360,100 | 18.454                                     | 0.6298      | 3.81148e4    | 938.47461    | 51.5458 |
| Signal 3: DAD1 C, Sig=210, 9 Ref=360,100 | Totals : 7.39436e4 2195.04822              |             |              |              |         |
| Signal 4: DAD1 D, Sig=230,16 Ref=360,100 | Results obtained with enhanced integrator: |             |              |              |         |
| Signal 5: DAD1 E, Sig=280,16 Ref=360,100 | *** End of Report ***                      |             |              |              |         |

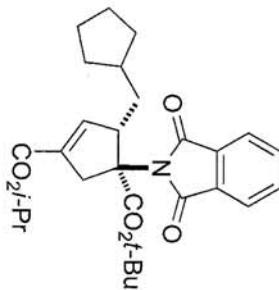

Table 3, entry 3  
 racemic sample

Injection Date : 2/26/2011 12:45:20 PM      Seq. Line : 22  
 Sample Name : YF1056 R1                              Location : Vial 55  
 Acq. Operator : JTM                                    Inj : 1  
 Acq. Instrument : Instrument 1                     Inj Volume : 5 µl  
 Different Inj Volume from Sequence 1          Actual Inj Volume : 3 µl  
 Acq. Method : C:\HPCHEM\1\METHODS\IC-3040.M  
 Last changed : 2/24/2011 9:13:33 PM by JTM  
 Analysis Method : C:\HPCHEM\1\METHODS\ISH-1010.M  
 Last changed : 2/26/2011 6:42:06 PM by JTM

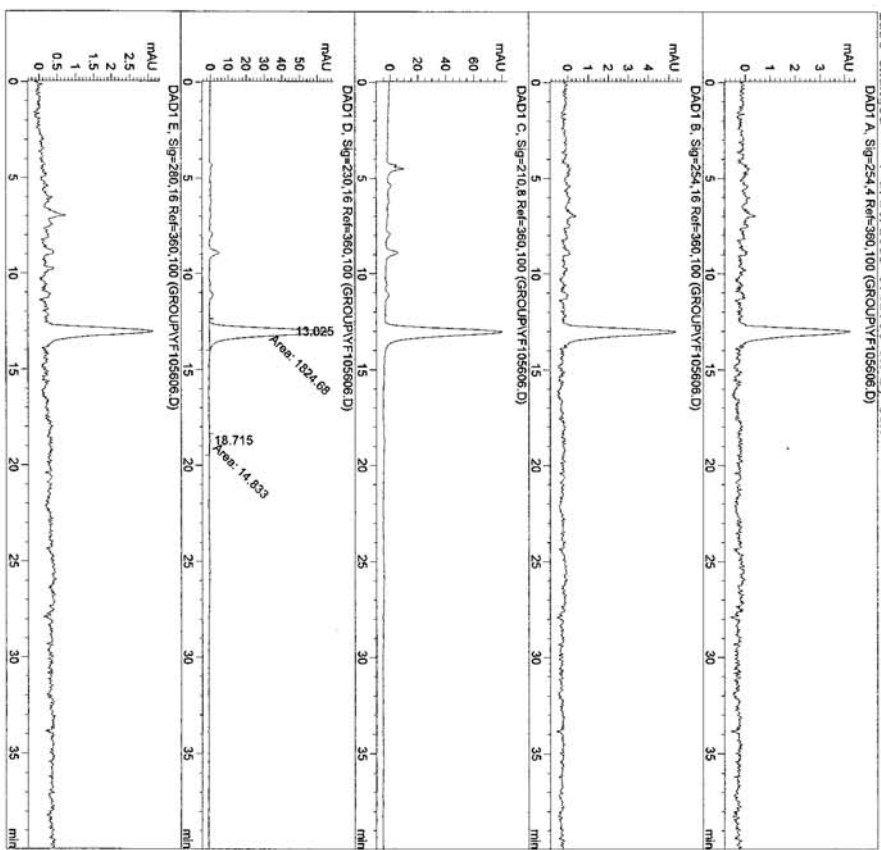

## Area Percent Report

Sorted By : Signal  
 Multiplier : 1.0000  
 Dilution : 1.0000  
 Use Multiplier & Dilution Factor with ISTDs

| Signal                                   | RetTime [min] | Type | Width [min] | Area [mAU*s] | Height [mAU] | Area %  |
|------------------------------------------|---------------|------|-------------|--------------|--------------|---------|
| Signal 1: DAD1 A, Sig=254.4 Ref=360.100  | 13.025        | NM   | 0.4563      | 1824.67590   | 66.65190     | 99.1936 |
| Signal 2: DAD1 B, Sig=254.16 Ref=360.100 | 18.715        | NM   | 0.4902      | 14.83295     | 5.04354e-1   | 0.8064  |
| Signal 3: DAD1 C, Sig=210.8 Ref=360.100  |               |      |             |              |              |         |
| Signal 4: DAD1 D, Sig=230.16 Ref=360.100 |               |      |             |              |              |         |
| Totals :                                 |               |      |             | 1839.50886   | 67.15626     |         |

Results obtained with enhanced integrator!

Signal 5: DAD1 E, Sig=280.16 Ref=360.100

\*\*\* End of Report \*\*\*

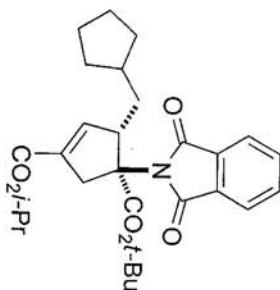

Table 3, entry 3  
 with (S)-catalyst

Before prep HPLC  
 purification

Injection Date : 2/26/2011 1:26:37 PM  
 Sample Name : YF1056 R2  
 Acq. Operator : JTM  
 Acq. Instrument : Instrument 1  
 Different Inj Volume from Sequence : Actual Inj Volume : 3 µl  
 Acq. Method : C:\HPCHEM\1\METHODS\IC-3040.M  
 Last changed : 2/4/2011 9:13:33 PM by JTM  
 Analysis Method : C:\HPCHEM\1\METHODS\ASH-1010.M  
 Last changed : 2/26/2011 6:42:06 PM by JTM

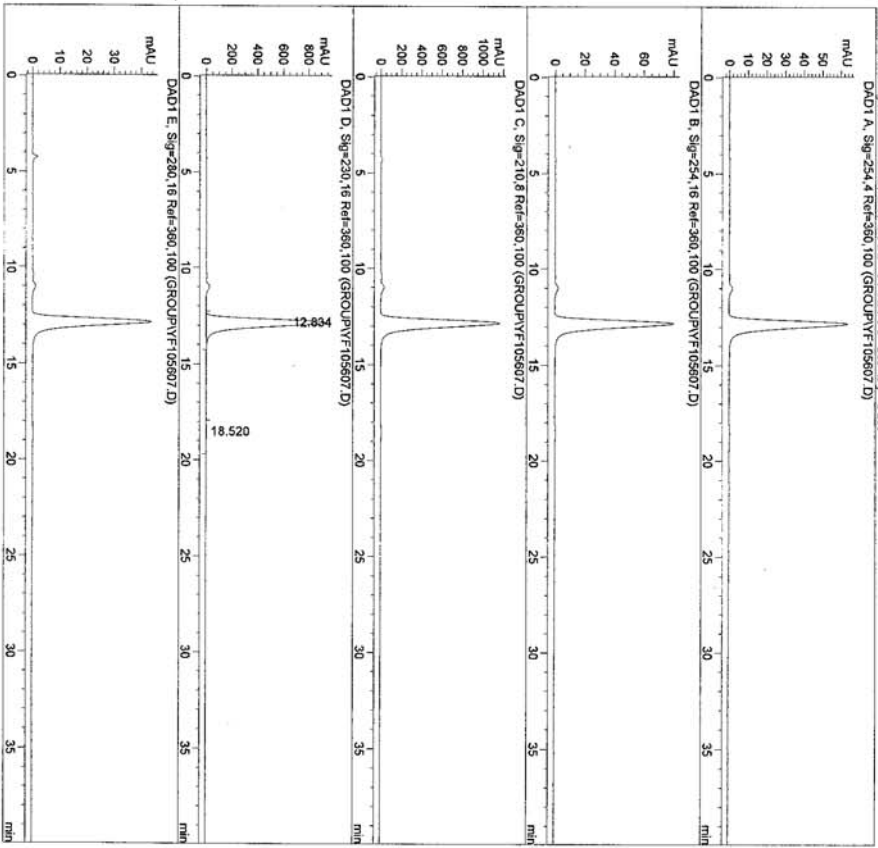

Area Percent Report

Sorted By : Signal  
 Multiplier : 1.0000  
 Dilution : 1.0000  
 Use Multiplier & Dilution Factor with ISTDs

Signal 1: DAD1 A, Sig=254,4 Ref=360,100  
 Signal 2: DAD1 B, Sig=254,16 Ref=360,100  
 Signal 3: DAD1 C, Sig=210,8 Ref=360,100  
 Signal 4: DAD1 D, Sig=230,16 Ref=360,100

| Peak #   | RetTime [min] | Type | Width [min] | Area [mAU*s] | Height [mAU] | Area %  |
|----------|---------------|------|-------------|--------------|--------------|---------|
| 1        | 12.834        | BB   | 0.4282      | 2.59324e4    | 933.27240    | 99.1146 |
| 2        | 18.520        | BB   | 0.4787      | 231.65501    | 5.79120      | 0.8854  |
| Totals : |               |      |             | 2.61640e4    | 939.06360    |         |

Results obtained with enhanced integrator!  
 Signal 5: DAD1 E, Sig=280,16 Ref=360,100

\*\*\* End of Report \*\*\*

After prep HPLC purification

Injection Date : 2/26/2011 2:07:55 PM  
 Sample Name : YF1083 S1  
 Acq. Operator : JTM  
 Acq. Instrument : Instrument 1  
 Different Inj Volume from Sequence : Actual Inj Volume : 5 µl  
 Inj Volume : 3 µl  
 Acq. Method : C:\HPCHEM\1\METHODS\IC-3040.M  
 Last changed : 2/4/2011 9:13:33 PM by JTM  
 Analysis Method : C:\HPCHEM\1\METHODS\ASH-1010.M  
 Last changed : 2/26/2011 6:42:06 PM by JTM  
 DAD1 A, Sig=254,16 Ref=360,100 (GROUP\FI108306.D)

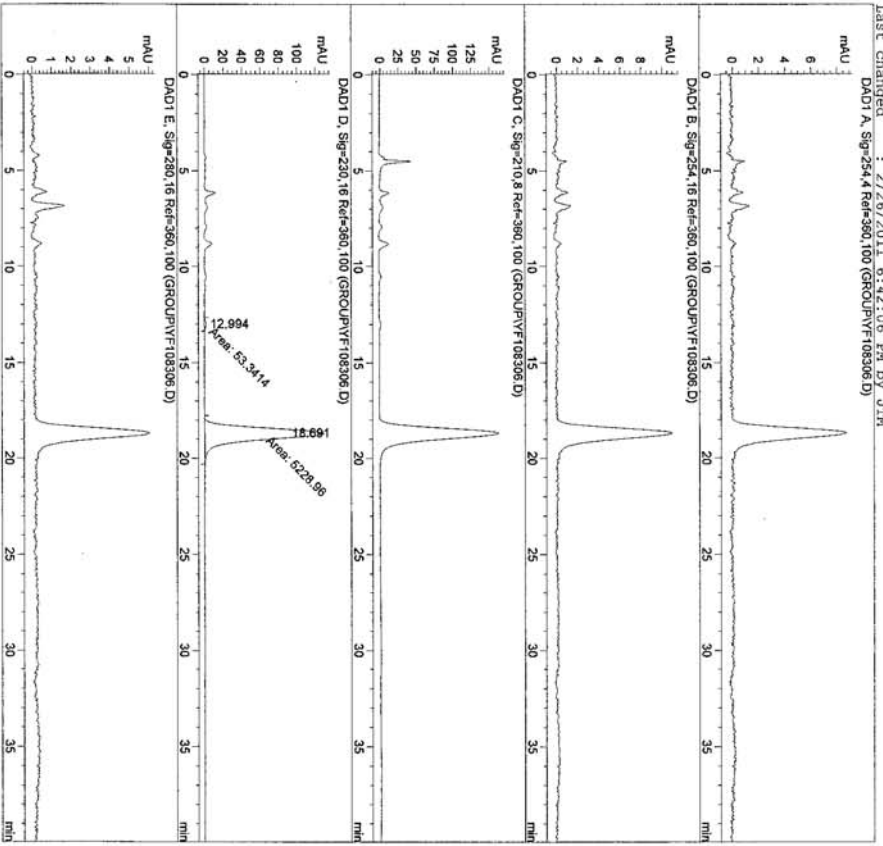

Area Percent Report

| Sorted By                                   | Signal |
|---------------------------------------------|--------|
| Multiplier                                  | 1.0000 |
| Dilution                                    | 1.0000 |
| Use Multiplier & Dilution Factor with ISTDs |        |

Signal 1: DAD1 A, Sig=254,16 Ref=360,100

Signal 2: DAD1 B, Sig=254,16 Ref=360,100

Signal 3: DAD1 C, Sig=210,8 Ref=360,100

Signal 4: DAD1 D, Sig=230,16 Ref=360,100

| Peak # | RetTime [min] | Type | Width [min] | Area [mAU*s] | Height [mAU] | Area %  |
|--------|---------------|------|-------------|--------------|--------------|---------|
| 1      | 12.994        | NM   | 0.4289      | 53.34139     | 2.07268      | 1.0098  |
| 2      | 18.691        | NM   | 0.6706      | 5228.95703   | 129.95149    | 98.9902 |

Totals : 5282.29842 132.02417

Results obtained with enhanced integrator:

Signal 5: DAD1 E, Sig=280,16 Ref=360,100

\*\*\* End of Report \*\*\*

Table 3, entry 3  
 with (R)-catalyst  
 Before prep HPLC  
 purification

Injection Date : 2/26/2011 2:49:14 PM  
 Sample Name : YF1083 S2  
 Acq. Operator : JTM  
 Acq. Instrument : Instrument 1  
 Different Inj Volume from Sequence : Actual Inj Volume : 5 µl  
 Inj Volume : 3 µl  
 Recd. Method : C:\HPCHEM\1\METHODS\IC-3040.M  
 Last changed : 2/4/2011 9:13:33 PM by JTM  
 Analysis Method : C:\HPCHEM\1\METHODS\MSH-1010.M  
 Last changed : 2/26/2011 6:42:06 PM by JTM  
 DAD1 A, Sig=254,16 Ref=360,100 (GROUP\FI108307.D)

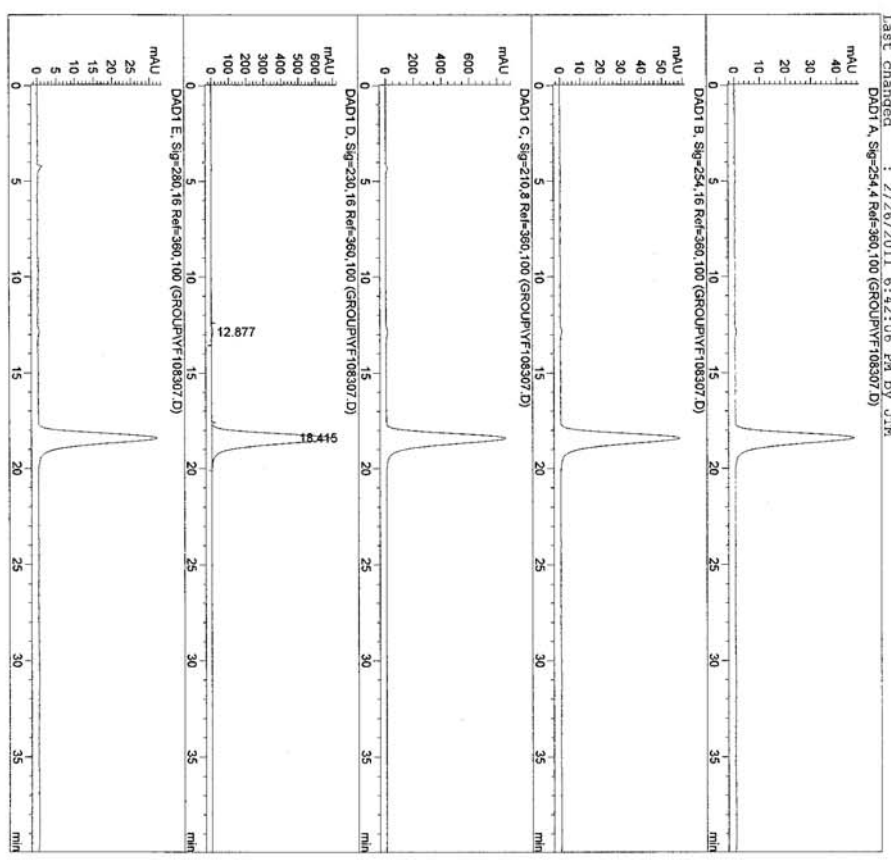

Area Percent Report  
 Sorted By : Signal  
 Multiplier : 1.0000  
 Dilution : 1.0000  
 Use Multiplier & Dilution Factor with ISTDs

Signal 1: DAD1 A, Sig=254,16 Ref=360,100  
 Signal 2: DAD1 B, Sig=254,16 Ref=360,100  
 Signal 3: DAD1 C, Sig=210,9 Ref=360,100  
 Signal 4: DAD1 D, Sig=230,16 Ref=360,100

Table 3, entry 3  
 with (R)-catalyst  
 After prep HPLC  
 purification

| Peak #   | RetTime [min] | Type | Width [min] | Area [mAU*s] | Height [mAU] | Area %  |
|----------|---------------|------|-------------|--------------|--------------|---------|
| 1        | 12.877        | BB   | 0.3377      | 224.49306    | 8.56744      | 0.8176  |
| 2        | 18.415        | BB   | 0.6122      | 2.72324e4    | 687.34766    | 99.1824 |
| Totals : |               |      |             | 2.74569e4    | 695.91510    |         |

Results obtained with enhanced integrator:  
 Signal 5: DAD1 E, Sig=280,16 Ref=360,100  
 \*\*\* End of Report \*\*\*



Injection Date : 5/3/2011 9:01:57 AM      Seq. Line : 53  
 Sample Name : YF1107 8 RAC                      Location : Vial 1  
 Acq. Operator : NB                                      Inj : 1  
 Acq. Instrument : Instrument 1                      Inj Volume : 15 µl  
 Different Inj Volume from Sequence :              Dilution : 1.0000  
 Acq. Method : C:\HPCHEM\1\METHODS\AD-10-50.M      Use Multiplier & Dilution Factor with ISTDs  
 Last changed : 4/23/2011 8:41:10 PM by CC  
 Analysis Method : C:\HPCHEM\1\METHODS\AS-00730.M  
 Last changed : 5/3/2011 12:23:07 PM by CC

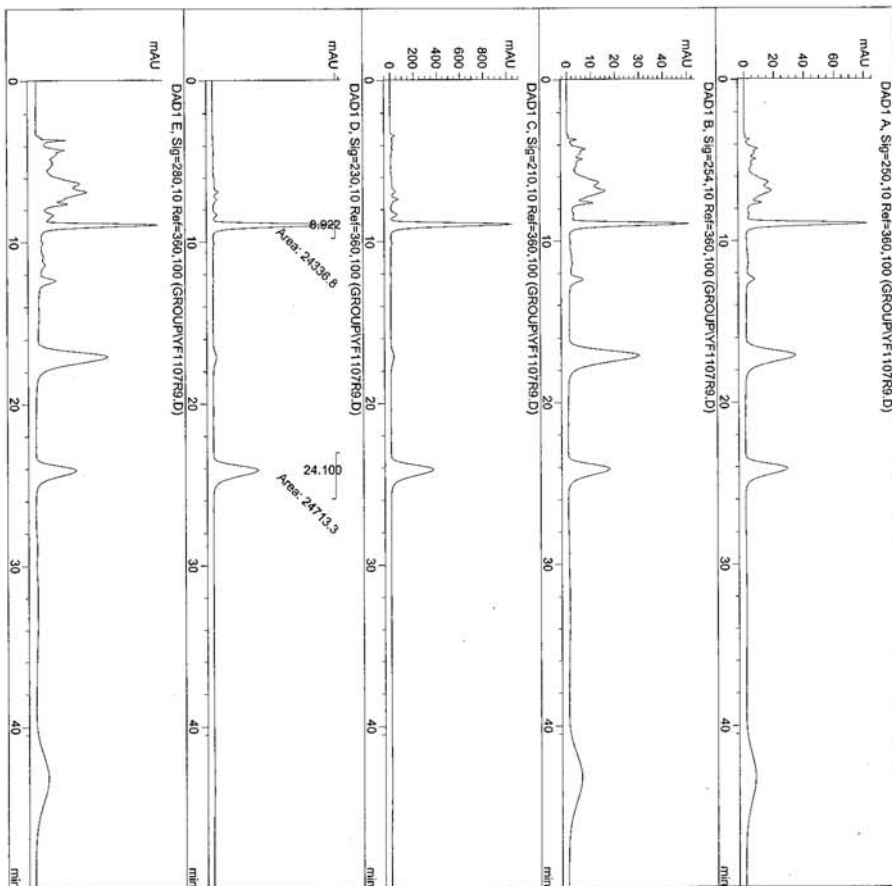

Area Percent Report

| Sorted By                                   | Signal |
|---------------------------------------------|--------|
| Multiplier                                  | 1.0000 |
| Dilution                                    | 1.0000 |
| Use Multiplier & Dilution Factor with ISTDs |        |

| Signal    | RetTime | Type | Width  | Area      | Height     | Area %  |
|-----------|---------|------|--------|-----------|------------|---------|
| Signal 1: | 8.922   | FM   | 0.2880 | 2.43368e4 | 1408.30347 | 49.6163 |
| Signal 2: | 24.100  | NM   | 0.8012 | 2.47133e4 | 514.06177  | 50.3837 |
| Totals:   |         |      |        | 4.90501e4 | 1922.36523 |         |

Results obtained with enhanced integrator:  
 Signal 5: DAD1 E, Sig=280,10 Ref=360,100

\*\*\* End of Report \*\*\*

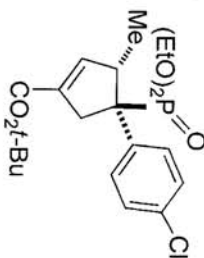

Table 4, entry 1

racemic sample

Injection Date : 5/3/2011 9:53:12 AM  
 Sample Name : VF1107  
 Acq. Operator : NB  
 Acq. Instrument : Instrument 1  
 Different Inj Volume from Sequence : Actual Inj Volume : 15 µl  
 Acq. Method : C:\HPCHEM\1\METHODS\AD-10-50.M  
 Last changed : 4/23/2011 8:41:10 PM by CC  
 Analysis Method : C:\HPCHEM\1\METHODS\AS-00730.M  
 Last changed : 5/3/2011 12:23:07 PM by CC

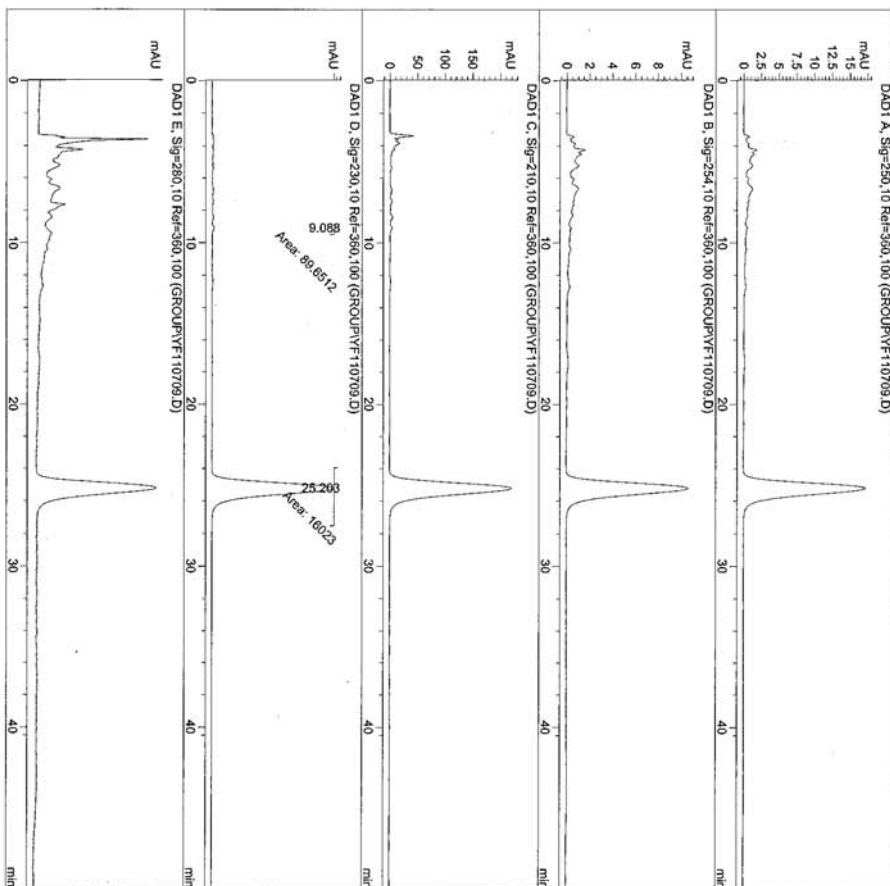

Area Percent Report

Sorted By : Signal  
 Multiplier : 1.0000  
 Dilution : 1.0000  
 Use Multiplier & Dilution Factor with ISTDs

| Signal                                   | Peak #                                     | RetTime [min] | Type | Width [min] | Area [mAU*s] | Height [mAU] | Area %  |
|------------------------------------------|--------------------------------------------|---------------|------|-------------|--------------|--------------|---------|
| Signal 1: DAD1 A, Sig=250,10 Ref=360,100 | 1                                          | 9.088         | WM   | 0.2821      | 89.65121     | 5.29612      | 0.5564  |
| Signal 2: DAD1 B, Sig=254,10 Ref=360,100 | 2                                          | 25.203        | WM   | 0.8480      | 1.60230e4    | 314.91232    | 99.4436 |
| Signal 3: DAD1 C, Sig=210,10 Ref=360,100 | Totals : 1.61126e4 320.20845               |               |      |             |              |              |         |
| Signal 4: DAD1 D, Sig=230,10 Ref=360,100 | Results obtained with enhanced integrator: |               |      |             |              |              |         |
| Signal 5: DAD1 E, Sig=280,10 Ref=360,100 | *** End of Report ***                      |               |      |             |              |              |         |

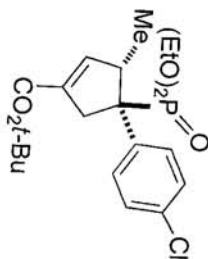

Table 4, entry 1  
 with (S)-catalyst

Injection Date : 5/3/2011 10:44:24 AM      Seq. Line : 55  
 Sample Name : YF1108                              Location : Vial 3  
 Acq. Operator : NB                                      Inj : 1  
 Acq. Instrument : Instrument 1                      Inj Volume : 15 µl  
 Different Inj Volume from Sequence :              Actual Inj Volume : 3 µl  
 Acq. Method : C:\HPCHEM\1\METHODS\VD-10-50.M  
 Last changed : 4/23/2011 8:41:10 PM by CC  
 Analysis Method : C:\HPCHEM\1\METHODS\AS-00730.M  
 Last changed : 5/3/2011 12:23:07 PM by CC

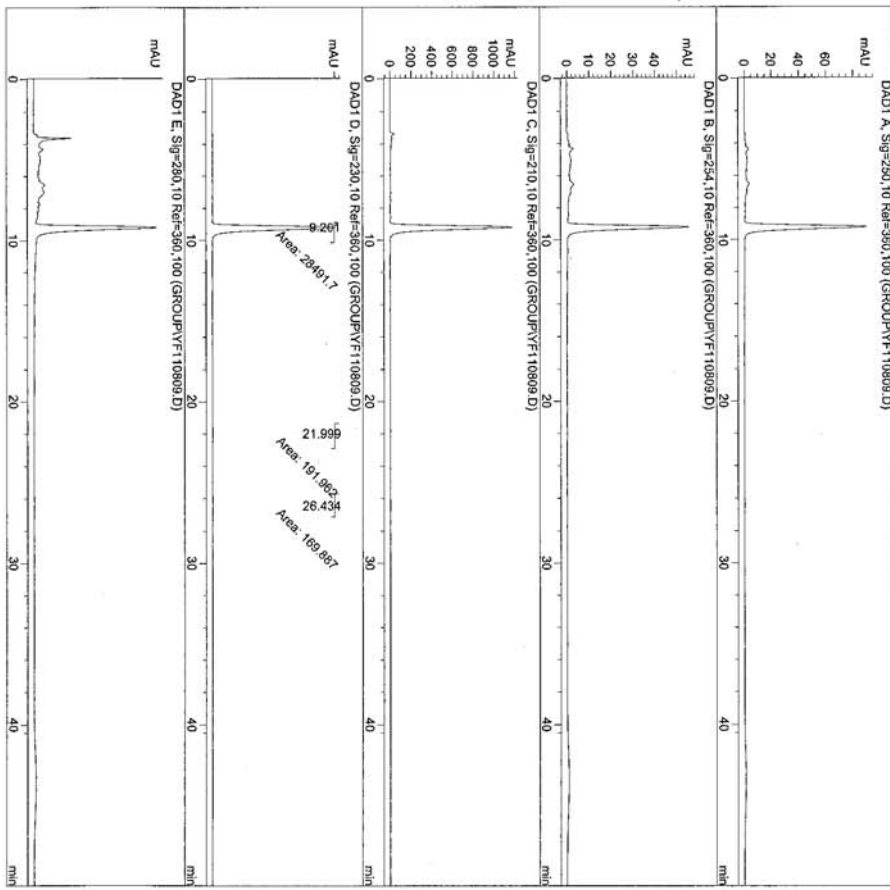

Area Percent Report

Sorted By : Signal  
 Multiplier : 1.0000  
 Dilution :  
 Use Multiplier & Dilution Factor with ISTDs

| Signal                                   | Peak # | Retention [min] | Type | Width [min] | Area [mAU*s] | Height [mAU] | Area %  |
|------------------------------------------|--------|-----------------|------|-------------|--------------|--------------|---------|
| Signal 1: DAD1 A, Sig=250,10 Ref=360,100 | 1      | 9.201           | MM   | 0.3074      | 2.84917e4    | 1544.52637   | 98.7459 |
| Signal 2: DAD1 B, Sig=254,10 Ref=360,100 | 2      | 21.999          | MM   | 0.8982      | 151.96202    | 3.56179      | 0.6653  |
| Signal 3: DAD1 C, Sig=210,10 Ref=360,100 | 3      | 26.434          | MM   | 0.8723      | 169.88744    | 3.24591      | 0.5888  |
| Totals :                                 |        |                 |      |             | 2.88536e4    | 1551.33407   |         |

Table 4, entry 1  
 with (R)-catalyst

Results obtained with enhanced integrator:  
 Signal 5: DAD1 E, Sig=280,10 Ref=360,100  
 \*\*\* End of Report \*\*\*

Acq. Operator : ATP  
 Acq. Instrument : Instrument 1  
 Injection Date : 2/27/2011 9:13:26 AM  
 Seq. Line : 35  
 Location : Vial 7  
 Inj Volume : 1 µl  
 Actual Inj Volume : 3 µl  
 Dilution : 1.0000  
 Use Multiplier & Dilution Factor with ISTDs

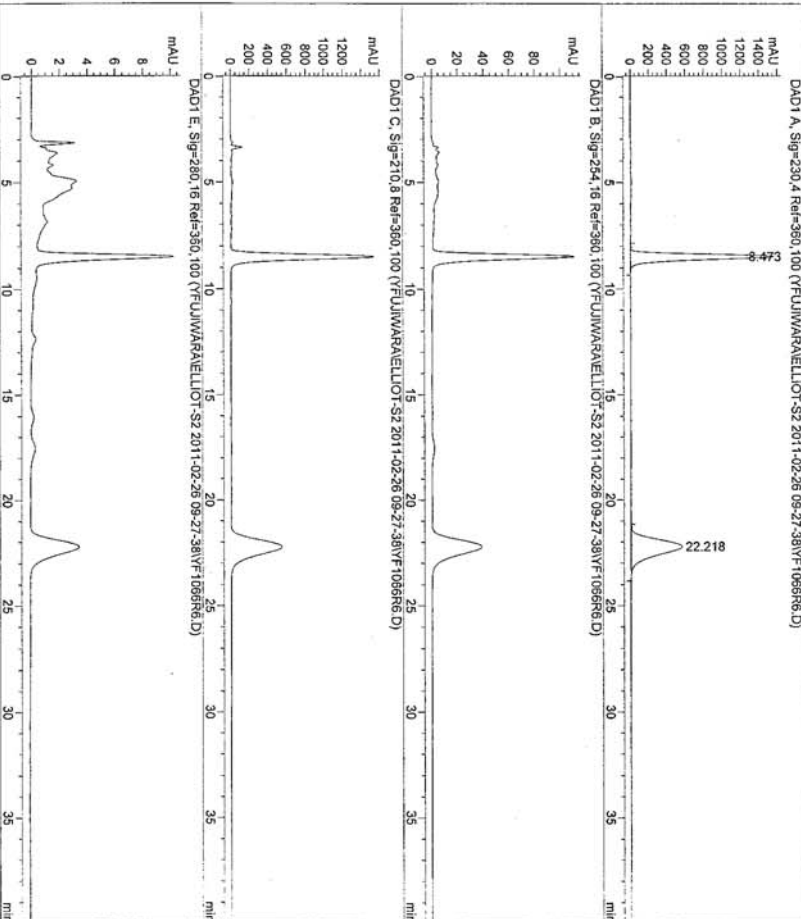

Area Percent Report

Sorted By : Signal  
 Multiplier: 1.0000  
 Dilution: 1.0000  
 Use Multiplier & Dilution Factor with ISTDs

Signal 1: DAD1 A, Sig=230,4 Ref=360,100

| Peak #   | RetTime [min] | Type | Width [min] | Area [mAU*s] | Height [mAU] | Area %  |
|----------|---------------|------|-------------|--------------|--------------|---------|
| 1        | 8.473         | BB   | 0.2766      | 2.79823e4    | 1565.02124   | 50.1835 |
| 2        | 22.218        | BB   | 0.7696      | 2.77777e4    | 559.15961    | 49.8165 |
| Totals : |               |      |             | 5.57600e4    | 2124.18085   |         |

Signal 2: DAD1 B, Sig=254,16 Ref=360,100  
 Signal 3: DAD1 C, Sig=210,8 Ref=360,100  
 Signal 4: DAD1 E, Sig=280,16 Ref=360,100

\*\*\* End of Report \*\*\*

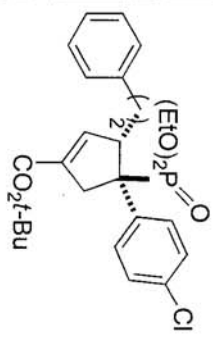

Table 4, entry 2  
 racemic sample

Acq. Operator : ATP  
 Acq. Instrument : Instrument 1  
 Injection Date : 2/27/2011 8:54:45 AM  
 Inj Volume : 1 µl  
 Actual Inj Volume : 3 µl  
 Location : Vial 8  
 Inj : 1  
 Different Inj Volume from Sequence !  
 Acq. Method : C:\CHEM32\1\DATA\YFUJIMARA\ELLIOT-S2 2011-02-26 09-27-38\AD-H10-40.M  
 Last Changed : 2/26/2011 8:52:21 AM by ATP  
 Analysis Method : C:\CHEM32\1\METHODS\AD-H02-60.M  
 Last Changed : 2/26/2011 8:39:09 PM by ATP  
 (modified after Loading)

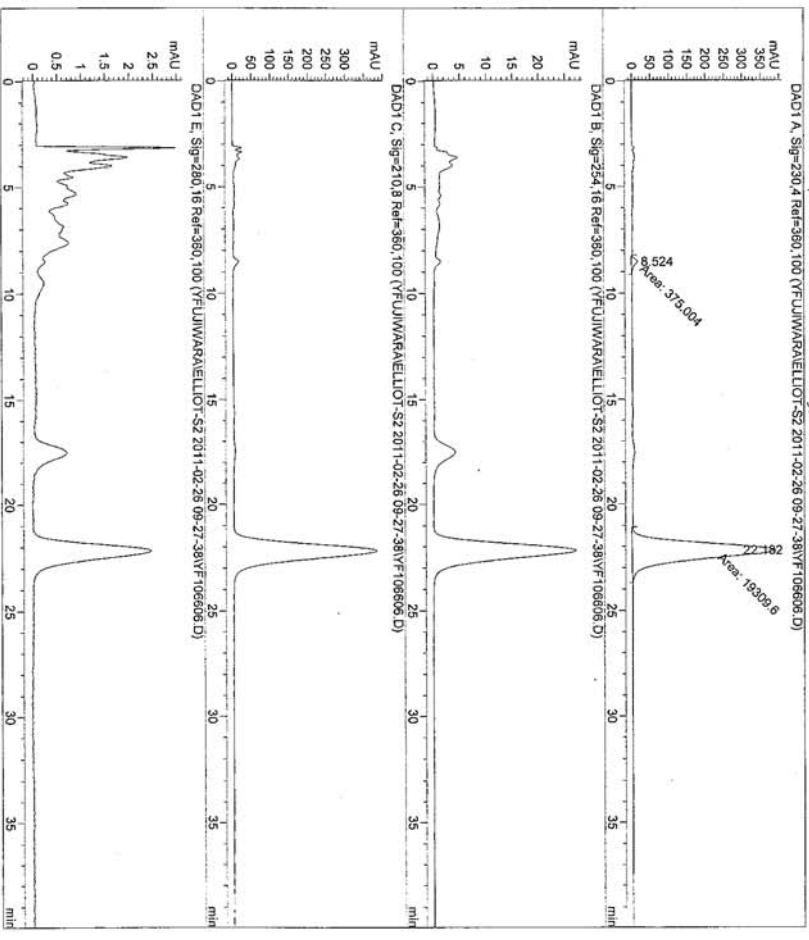

Area Percent Report

Sorted By : Signal  
 Multiplier: 1.0000  
 Dilution: 1.0000  
 Use Multiplier & Dilution Factor with ISTDs

Signal 1: DAD1 A, Sig=230, 4 Ref=360,100

| Peak #   | RetTime [min] | Type | Width [min] | Area [mAU*s] | Height [mAU] | Area %  |
|----------|---------------|------|-------------|--------------|--------------|---------|
| 1        | 8.524         | MM   | 0.3904      | 375.00385    | 16.01004     | 1.9051  |
| 2        | 22.182        | MM   | 0.8225      | 1.93096e4    | 391.29907    | 98.0949 |
| Totals : |               |      |             | 1.96946e4    | 407.30911    |         |

Signal 2: DAD1 B, Sig=254, 16 Ref=360, 100  
 Signal 3: DAD1 C, Sig=210, 8 Ref=360, 100  
 Signal 4: DAD1 E, Sig=280, 16 Ref=360, 100

\*\*\* End of Report \*\*\*

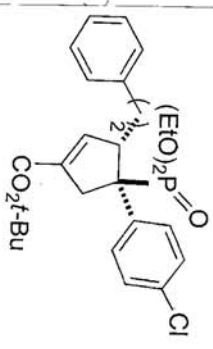

Table 4, entry 2  
 with (S)-catalyst

Acq. Operator : ATP  
 Acq. Instrument : Instrument 1  
 Injection Date : 2/27/2011 9:36:03 AM  
 Seq. Line : 37  
 Location : Vial 9  
 Inj Volume : 1 µl  
 Inj Volume from Sequence : 1  
 Actual Inj Volume : 3 µl  
 Acq. Method : C:\CHEM32\1\DATA\FUJIMARA\ELLIOT-S2 2011-02-26 09-27-38\AD-H10-40.M  
 Last changed : 2/26/2011 8:52:21 AM by ATP  
 Analysis Method : C:\CHEM32\1\METHODS\AD-H02-60.M  
 Last changed : 2/26/2011 8:39:08 PM by ATP  
 (modified after loading)

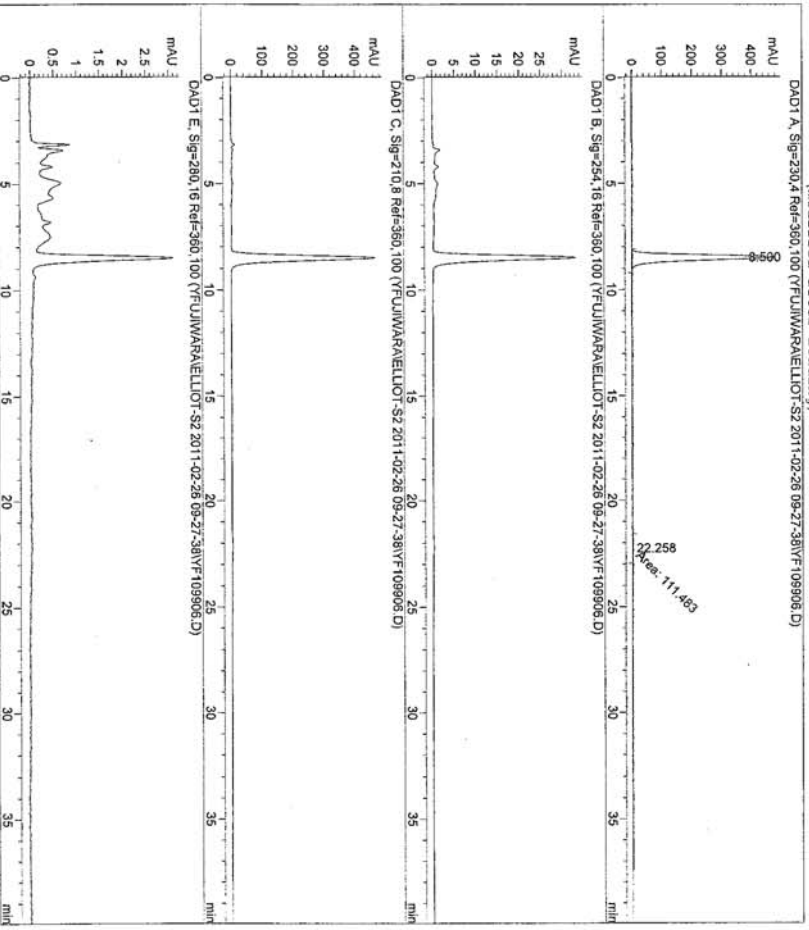

Area Percent Report  
 Sorted By : Signal  
 Multiplier: : 1.0000  
 Dilution: : 1.0000  
 Use Multiplier & Dilution Factor with ISTDs

Signal 1: DAD1 A, Sig=230,4 Ref=360,100

| Peak #   | RetTime [min] | Type | Width [min] | Area [mAU*s] | Height [mAU] | Area %  |
|----------|---------------|------|-------------|--------------|--------------|---------|
| 1        | 8.500         | BB   | 0.2695      | 8285.64160   | 475.08841    | 98.6724 |
| 2        | 22.258        | NM   | 0.8139      | 111.48270    | 2.28288      | 1.3276  |
| Totals : |               |      |             | 8397.12430   | 477.37129    |         |

Table 4, entry 2  
 with (R)-catalyst

Signal 2: DAD1 B, Sig=254,16 Ref=360,100  
 Signal 3: DAD1 C, Sig=210,8 Ref=360,100  
 Signal 4: DAD1 E, Sig=280,16 Ref=360,100  
 \*\*\* End of Report \*\*\*

Acq. Operator : ATP  
 Acq. Instrument : Instrument 1  
 Injection Date : 2/26/2011 11:33:57 AM  
 Seq. Line : 5  
 Location : Vial 4  
 Inj : 1  
 Inj Volume : 1 µl  
 Actual Inj Volume : 3 µl  
 Dilution : 1.0000  
 Use Multiplier & Dilution Factor with ISTDs

Different Inj Volume from Sequence 1  
 Acq. Method : C:\CHEM32\1\DATA\VFUJIMARA\ELLIOT-S2 2011-02-26 09-27-38\VD-H10-30.M  
 Last changed : 2/26/2011 8:52:00 AM by ATP  
 Analysis Method : C:\CHEM32\1\METHODS\AD-H02-60.M  
 Last changed : 2/26/2011 8:39:08 PM by ATP  
 (modified after loading)

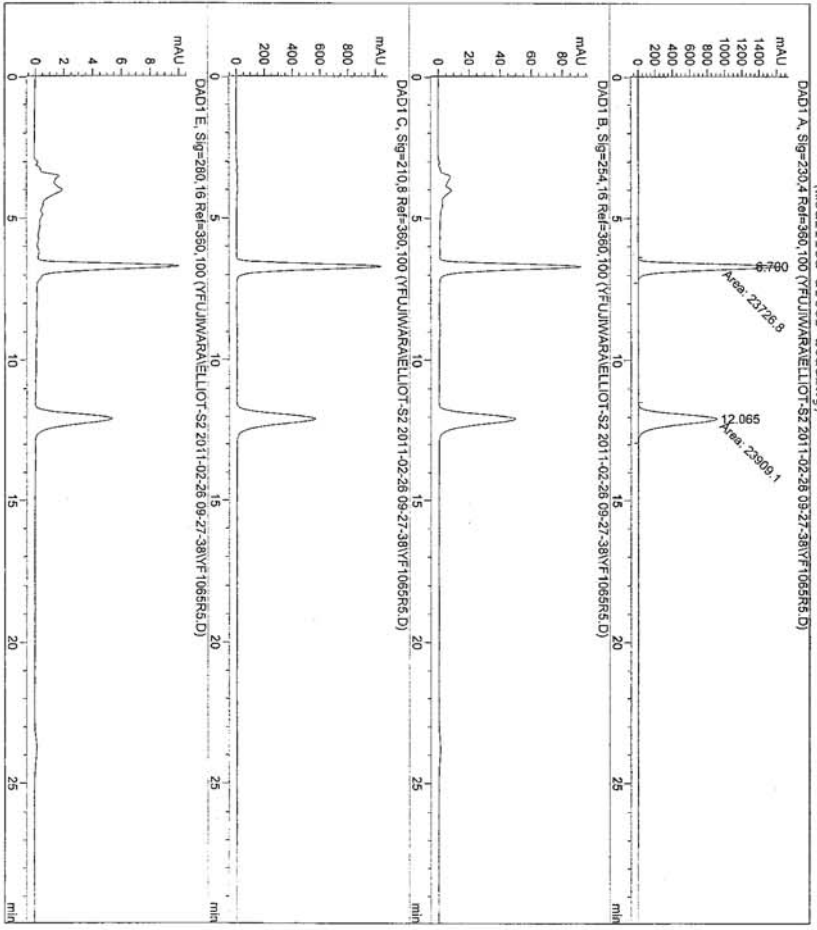

Area Percent Report

Sorted by : Signal  
 Multiplier : 1.0000  
 Dilution : 1.0000  
 Use Multiplier & Dilution Factor with ISTDs

Signal 1: DAD1 A, sig=230,4 Ref=360,100

| Peak #   | RetTime [min] | Type | Width [min] | Area [mAU*s] | Height [mAU] | Area %  |
|----------|---------------|------|-------------|--------------|--------------|---------|
| 1        | 6.700         | NM   | 0.2394      | 2.37268e4    | 1652.04541   | 49.8087 |
| 2        | 12.065        | NM   | 0.4380      | 2.39091e4    | 909.70343    | 50.1913 |
| Totals : |               |      |             | 4.76359e4    | 2561.74884   |         |

Signal 2: DAD1 B, Sig=254,16 Ref=360,100  
 Signal 3: DAD1 C, sig=210,8 Ref=360,100  
 Signal 4: DAD1 E, sig=280,16 Ref=360,100

\*\*\* End of Report \*\*\*

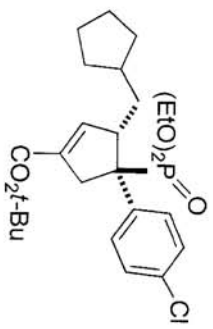

Table 4, entry 3  
 racemic sample

Acq. Operator : ATP  
 Acq. Instrument : Instrument 1  
 Injection Date : 2/26/2011 12:05:11 PM  
 Seq. Line : 6  
 Location : Vial 5  
 Inj : 1  
 Inj Volume : 1 µl  
 Actual Inj Volume : 3 µl  
 Different Inj Volume from Sequence :  
 Acq. Method : C:\CHEM32\1\DATA\VFUJIWARA\ELLIOT-S2 2011-02-26 09-27-38\AD-H10-30.M  
 Last changed : 2/26/2011 8:52:00 AM by ATP  
 Analysis Method : C:\CHEM32\1\METHODS\AD-H02-60.M  
 Last changed : 2/26/2011 8:39:08 PM by ATP  
 (modified after loading)

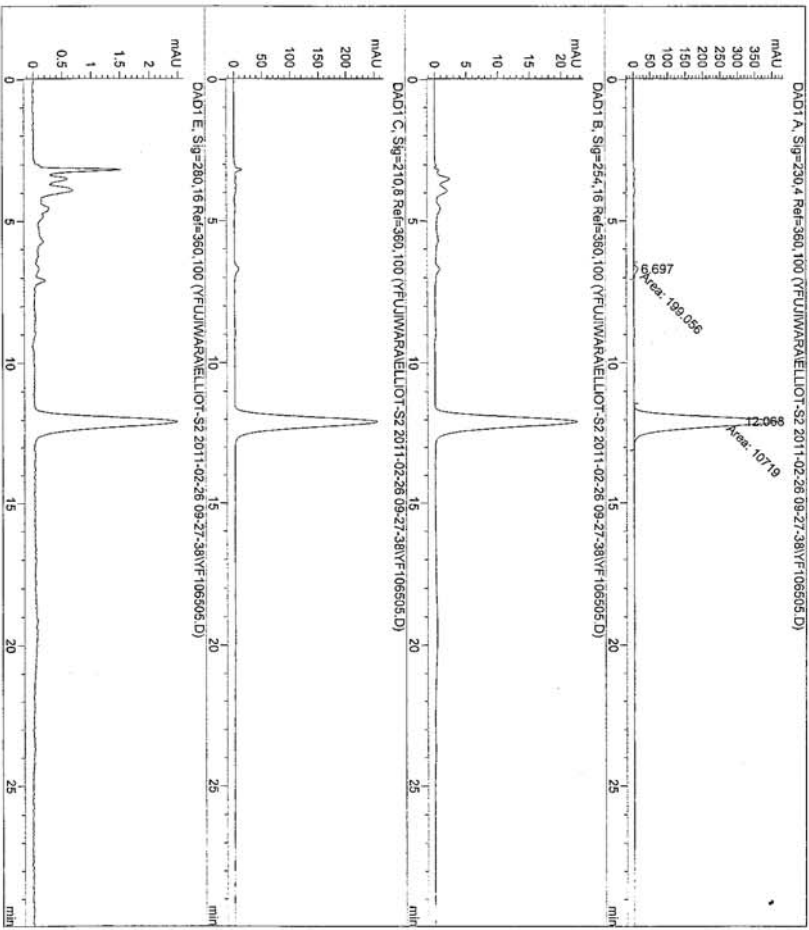

Area Percent Report  
 Sorted By : Signal  
 Multiplier : 1.0000  
 Dilution : 1.0000  
 Use Multiplier & Dilution Factor with ISTDs

| Peak #   | RetTime [min] | Type | Width [min] | Area [mAU*s] | Height [mAU] | Area %  |
|----------|---------------|------|-------------|--------------|--------------|---------|
| 1        | 6.697         | MM   | 0.2661      | 199.05574    | 12.46568     | 1.8232  |
| 2        | 12.068        | MM   | 0.4323      | 1.07190e4    | 413.23291    | 98.1768 |
| Totals : |               |      |             | 1.09181e4    | 425.69859    |         |

Signal 1: DAD1 A, Sig=230,4 Ref=360,100  
 Signal 2: DAD1 B, Sig=254,16 Ref=360,100  
 Signal 3: DAD1 C, Sig=210,8 Ref=360,100  
 Signal 4: DAD1 E, Sig=280,16 Ref=360,100

\*\*\* End of Report \*\*\*

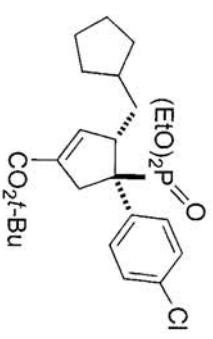

Table 4, entry 3  
 with (S)-catalyst



Acq. Operator : ATP  
 Acq. Instrument : Instrument 1  
 Injection Date : 2/26/2011 12:36:29 PM  
 Seq. Line : 7  
 Location : Vial 6  
 Inj : 1  
 Inj Volume : 1 µl  
 Actual Inj Volume : 3 µl  
 Different Inj Volume from Sequence 1  
 Acq. Method : C:\CHEM32\1\DATA\YFUJIMARA\ELLIOT-S2 2011-02-26 09-27-38\AD-H10-30.M  
 Last changed : 2/26/2011 8:52:00 AM by ATP  
 Analysis Method : C:\CHEM32\1\METHODS\AD-H02-60.M  
 Last changed : 2/26/2011 8:39:08 PM by ATP  
 (modified after loading)

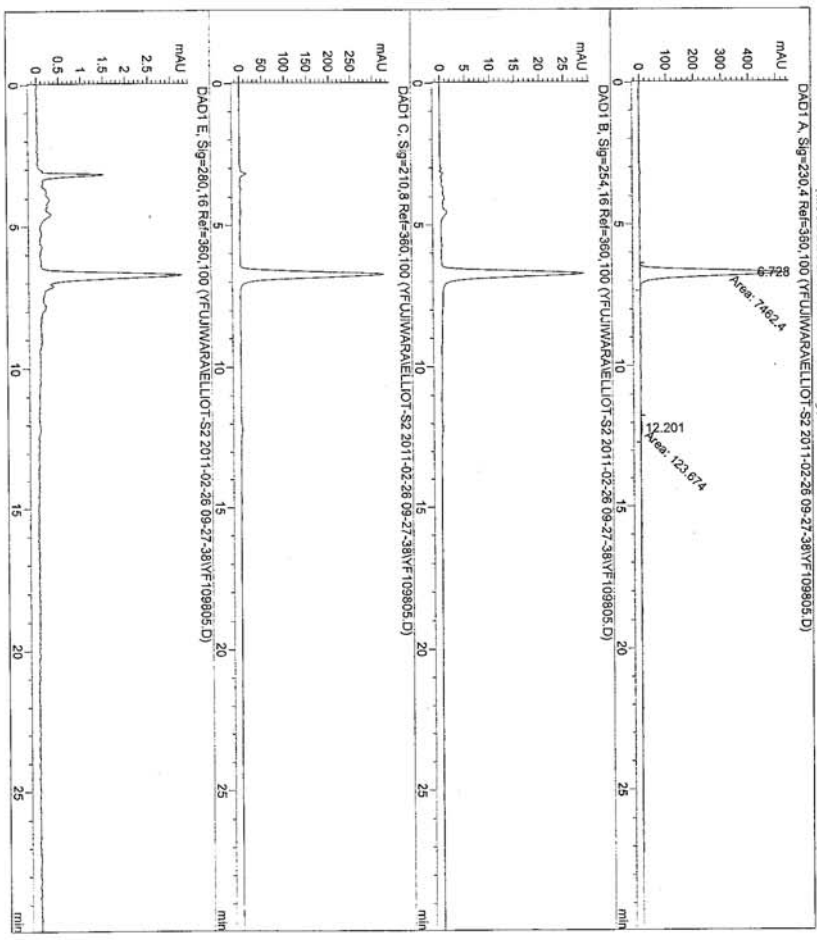

Area Percent Report

Sorted By : Signal  
 Multiplier: : 1.0000  
 Dilution: : 1.0000  
 Use Multiplier & Dilution Factor with ISTDs

Signal 1: DAD1 A, Sig=230,4 Ref=360,100

| Peak #   | RetTime [min] | Type | Width [min] | Area [mAU*s] | Height [mAU] | Area %  |
|----------|---------------|------|-------------|--------------|--------------|---------|
| 1        | 6.728         | MM   | 0.2370      | 7462.39600   | 524.88641    | 98.3697 |
| 2        | 12.201        | MM   | 0.4653      | 123.67419    | 4.42983      | 1.6303  |
| Totals : |               |      |             | 7586.07019   | 529.31625    |         |

Table 4, entry 3  
 with (R)-catalyst

Signal 2: DAD1 B, Sig=254,16 Ref=360,100  
 Signal 3: DAD1 C, Sig=210,8 Ref=360,100  
 Signal 4: DAD1 E, Sig=280,16 Ref=360,100

\*\*\* End of Report \*\*\*

Acq. Operator : ATP  
 Acq. Instrument : Instrument 1  
 Injection Date : 2/27/2011 5:09:00 AM  
 Seq. Line : 31  
 Location : Vial 19  
 Inj : 1  
 Inj Volume : 1 µl  
 Actual Inj Volume : 3 µl  
 Different Inj Volume from Sequence :  
 Acq. Method : C:\CHEM32\1\DATA\VFUJIMARA\ELLIOT-S2 2011-02-26 09-27-38\AD-H01-50.M  
 Last changed : 2/26/2011 9:30:42 AM by ATP  
 Analysis Method : C:\CHEM32\1\METHODS\AD-H02-60.M  
 Last changed : 2/26/2011 8:39:08 PM by ATP  
 (modified after Loading)

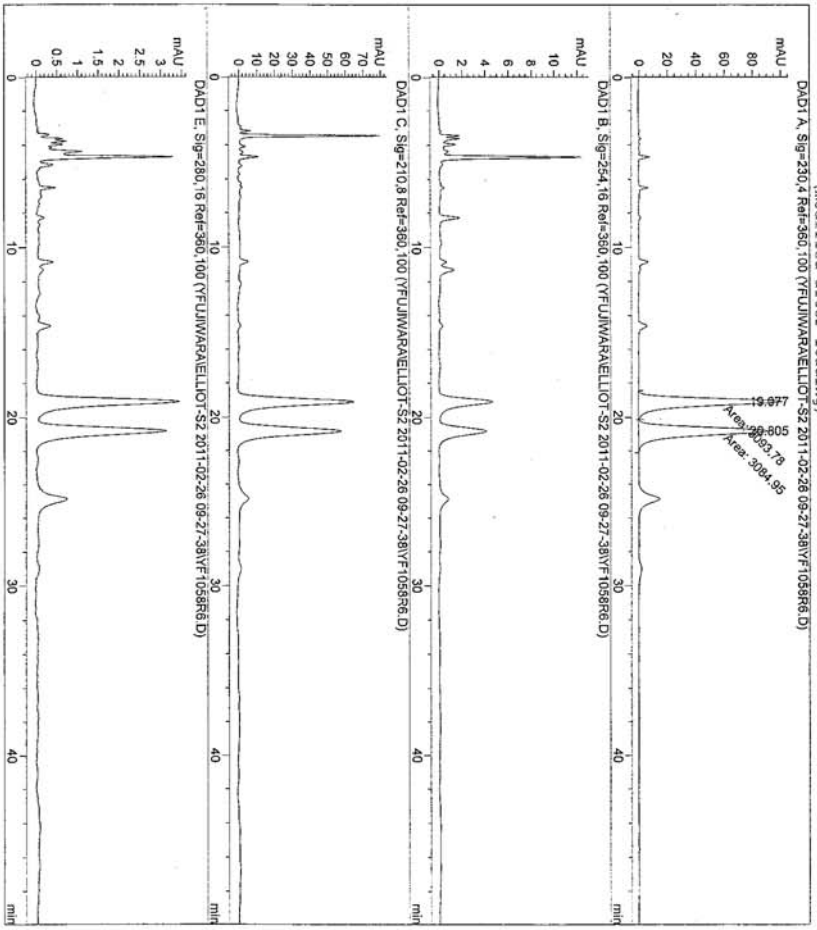

Area Percent Report

Sorted By : Signal  
 Multiplier: 1.0000  
 Dilution: 1.0000  
 Use Multiplier & Dilution Factor with ISTDs

Signal 1: DAD1 A, Sig=230,4 Ref=360,100

| Peak #  | RetTime [min] | Type | Width [min] | Area [mAU*s] | Height [mAU] | Area %  |
|---------|---------------|------|-------------|--------------|--------------|---------|
| 1       | 19.077        | MM   | 0.5079      | 3093.77808   | 101.52602    | 50.0714 |
| 2       | 20.805        | MM   | 0.5638      | 3084.95190   | 91.18791     | 49.9286 |
| Totals: |               |      |             | 6178.72998   | 192.71394    |         |

Signal 2: DAD1 B, Sig=254,16 Ref=360,100  
 Signal 3: DAD1 C, Sig=210,8 Ref=360,100  
 Signal 4: DAD1 E, Sig=280,16 Ref=360,100

\*\*\* End of Report \*\*\*

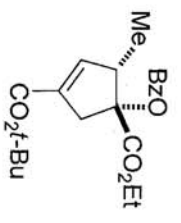

Table 5, entry 1  
 racemic sample

Acq. Operator : ATP  
 Acq. Instrument : Instrument 1  
 Injection Date : 2/27/2011 5:59:16 AM  
 Seq. Line : 32  
 Location : Vial 20  
 Inj : 1  
 Inj Volume : 1 µl  
 Actual Inj Volume : 3 µl  
 Acq. Method : C:\CHEM32\1\DATA\VFUJIMARA\ELLIOT-S2 2011-02-26 09-27-38\AD-H01-50.M  
 Last changed : 2/26/2011 9:30:42 AM by ATP  
 Analysis Method : C:\CHEM32\1\METHODS\AD-H02-60.M  
 Last changed : 2/26/2011 8:39:08 PM by ATP  
 (modified after loading)

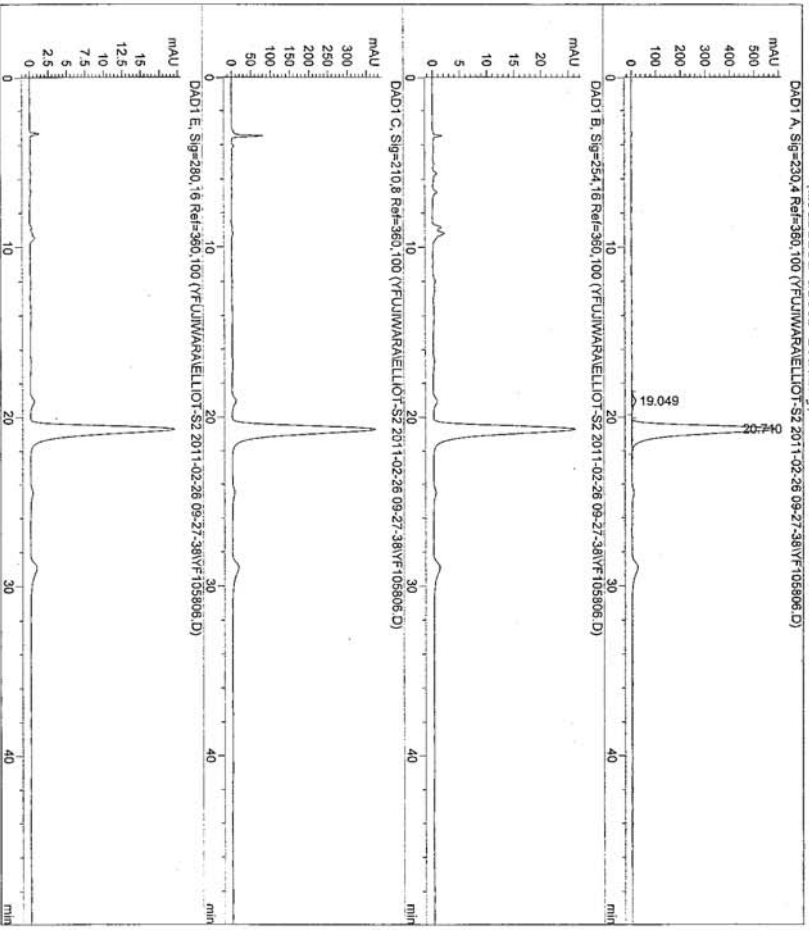

Area Percent Report

Sorted By : Signal  
 Multiplier: 1.0000  
 Dilution: 1.0000  
 Use Multiplier & Dilution Factor with ISTDs

Signal 1: DADI A, Sig=230,4 Ref=360,100

| Peak #   | RetTime [min] | Type | Width [min] | Area [mAU*s] | Height [mAU] | Area %  |
|----------|---------------|------|-------------|--------------|--------------|---------|
| 1        | 19.049        | BB   | 0.4751      | 499.30032    | 15.95282     | 2.4126  |
| 2        | 20.710        | BB   | 0.5287      | 2.0196084    | 582.27618    | 97.5874 |
| Totals : |               |      |             | 2.06953e4    | 598.22901    |         |

Signal 2: DADI B, Sig=254,16 Ref=360,100  
 Signal 3: DADI C, Sig=210,8 Ref=360,100  
 Signal 4: DADI E, Sig=280,16 Ref=360,100

\*\*\* End of Report \*\*\*

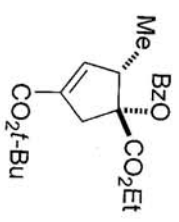

Table 5, entry 1  
 with (S)-catalyst

Acq. Operator : ATP  
 Acq. Instrument : Instrument 1  
 Injection Date : 2/27/2011 6:50:39 AM  
 Seg. Line : 33  
 Location : Vial 21  
 Inj : 1  
 Inj Volume : 1 µl  
 Actual Inj Volume : 3 µl  
 Different Inj Volume from Sequence :  
 Acq. Method : C:\CHEM32\1\DATA\YFUJIMARA\ELLIOT-S2 2011-02-26 09-27-38\AD-H01-50.M  
 Last changed : 2/26/2011 9:30:42 AM by ATP  
 Analysis Method : C:\CHEM32\1\METHODS\AD-H02-60.M  
 Last changed : 2/26/2011 8:39:08 PM by ATP  
 (modified after loading)

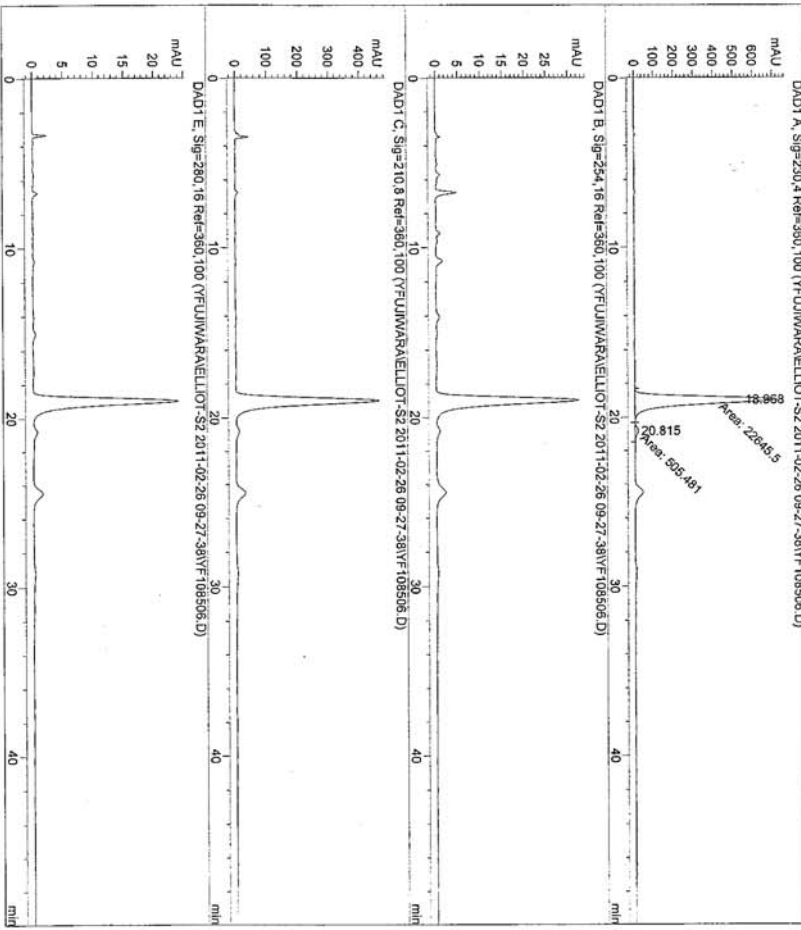

Area Percent Report

Sorted By : Signal  
 Multiplier: : 1.0000  
 Dilution: : 1.0000  
 Use Multiplier & Dilution Factor with ISTDs

Signal 1: DAD1 A, Sig=230,4 Ref=360,100

| Peak #   | RetTime [min] | Type | Width [min] | Area [mAU*s] | Height [mAU] | Area %  |
|----------|---------------|------|-------------|--------------|--------------|---------|
| 1        | 18.968        | MM   | 0.5207      | 2.264554     | 724.85608    | 97.8166 |
| 2        | 20.815        | MM   | 0.5301      | 505.48083    | 15.89293     | 2.1834  |
| Totals : |               |      |             | 2.3151064    | 740.74901    |         |

Table 5, entry 1  
 with (F)-catalyst

Signal 2: DAD1 B, Sig=254,16 Ref=360,100  
 Signal 3: DAD1 C, Sig=210,8 Ref=360,100  
 Signal 4: DAD1 E, Sig=280,16 Ref=360,100

\*\*\* End of Report \*\*\*

Injection Date : 4/7/2011 10:48:47 PM  
 Sample Name : YF1193 RAC  
 Acq. Operator : JTM  
 Acq. Instrument : Instrument 1  
 Different Inj Volume from Sequence 1 : Inj Volume : 5 µl  
 Acq. Method : C:\HPCHEM\1\METHODS\IC-1030.M  
 Last changed : 3/1/2011 10:19:39 AM by JTM  
 Inj Volume : 5 µl  
 Dilution : 3 µl  
 Analysis Method : C:\HPCHEM\1\METHODS\ODH-0320.M  
 Last changed : 4/5/2011 4:21:42 PM by JTM

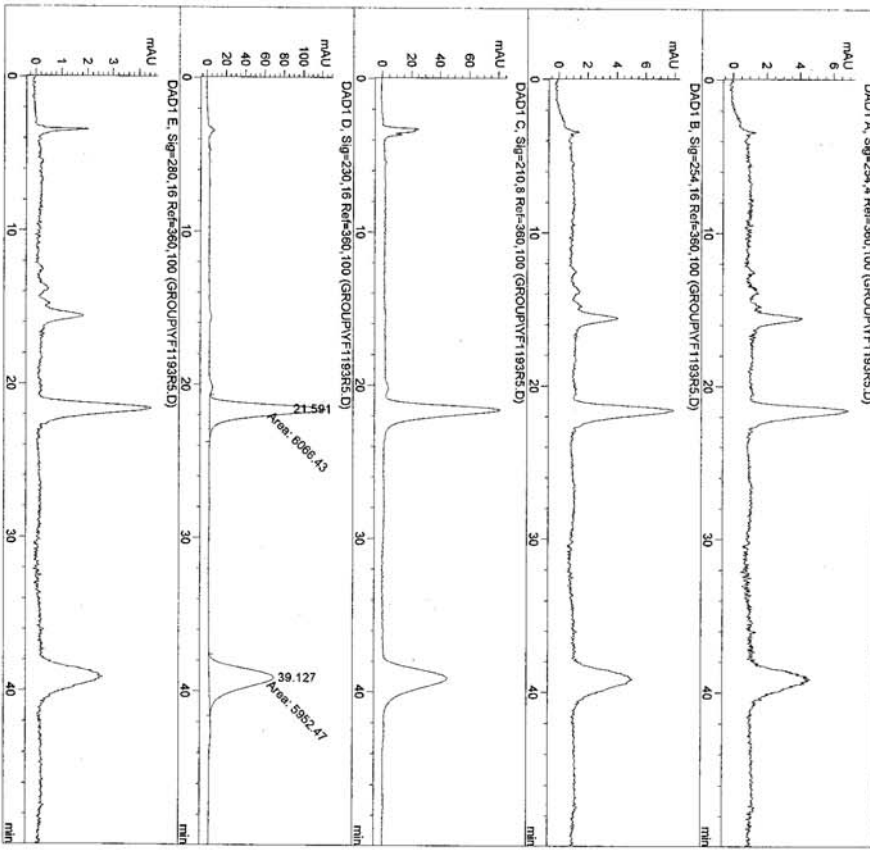

Area Percent Report

| Sorted By                                   | Signal |
|---------------------------------------------|--------|
| Multiplier                                  | 1.0000 |
| Dilution                                    | 1.0000 |
| Use Multiplier & Dilution Factor with ISTDs |        |

Signal 1: DAD1 A, Sig=254,4 Ref=360,100  
 Signal 2: DAD1 B, Sig=254,16 Ref=360,100  
 Signal 3: DAD1 C, Sig=210,8 Ref=360,100  
 Signal 4: DAD1 D, Sig=230,16 Ref=360,100

| Peak #  | RetTime [min] | Type | Width [min] | Area [mAU*s] | Height [mAU] | Area %  |
|---------|---------------|------|-------------|--------------|--------------|---------|
| 1       | 21.591        | NM   | 0.8388      | 6066.43408   | 120.53661    | 50.4741 |
| 2       | 39.127        | NM   | 1.4786      | 5952.47217   | 67.09765     | 49.5259 |
| Totals: |               |      |             | 1.20189e4    | 187.63425    |         |

Results obtained with enhanced integrator!  
 Signal 5: DAD1 E, Sig=280,16 Ref=360,100

\*\*\* End of Report \*\*\*

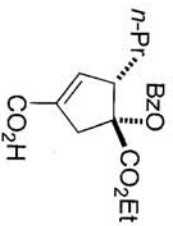

Table 5, entry 2  
 racemic sample

Injection Date : 4/7/2011 11:40:06 PM  
 Sample Name : YF1193 S-CAT  
 Acq. Operator : JTM  
 Acq. Instrument : Instrument 1  
 Different Inj Volume from Sequence : Actual Inj Volume : 5 ml  
 Inj Volume : 3 ml  
 Acq. Method : C:\HPCHEM\1\METHODS\IC-1050.M  
 Last changed : 3/1/2011 10:19:39 AM by JTM  
 Analysis Method : C:\HPCHEM\1\METHODS\VDH-0320.M  
 Last changed : 4/5/2011 4:21:42 PM by JTM  
 Last changed : 4/5/2011 4:21:42 PM by JTM

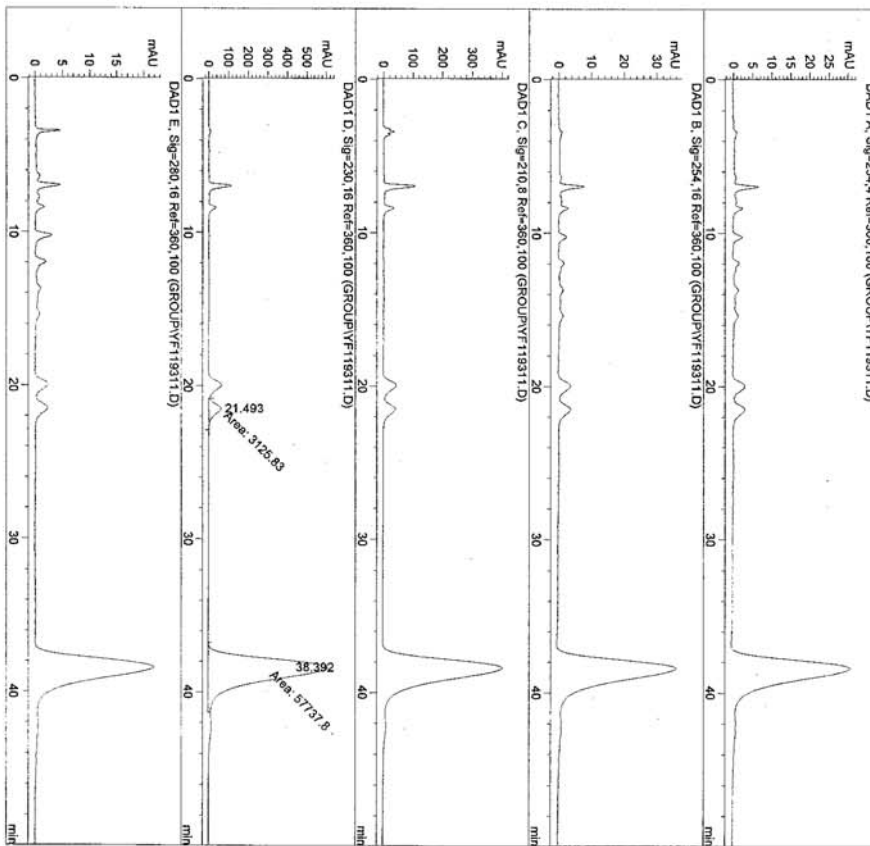

Area Percent Report  
 Sorted By : Signal  
 Multiplier : 1.0000  
 Dilution : 1.0000  
 Use Multiplier & Dilution Factor with ISTDs

| Signal                                   | RetTime [min] | Type | Width [min] | Area [mAU*s] | Height [mAU] | Area %  |
|------------------------------------------|---------------|------|-------------|--------------|--------------|---------|
| Signal 1: DAD1 A, Sig=254,4 Ref=360,100  | 21.493        | FM   | 0.8163      | 3125.82690   | 63.81986     | 5.1358  |
| Signal 2: DAD1 B, Sig=254,16 Ref=360,100 | 38.392        | MF   | 1.5706      | 5.77378e4    | 612.69031    | 94.8642 |
| Totals : 6.08636e4 676.50917             |               |      |             |              |              |         |

Results obtained with enhanced integrator:  
 Signal 5: DAD1 E, Sig=280,16 Ref=360,100  
 \*\*\* End of Report \*\*\*

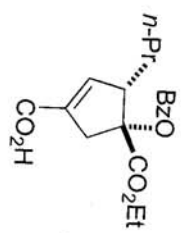

Table 5, entry 2  
 with (S)-catalyst

Injection Date : 4/8/2011 12:31:23 AM  
 Seq. Line : 16  
 Sample Name : YF1193 R-CAT  
 Location : Vial 20  
 Acq. Operator : JTM  
 Inj : 1  
 Acq. Instrument : Instrument 1  
 Different Inj Volume from Sequence : Actual Inj Volume : 5 µl  
 Acq. Method : C:\HPCHEM\1\METHODS\IC-1050.M  
 Last Changed : 3/1/2011 10:19:39 AM by JTM  
 Inj Volume : 3 µl  
 Analysis Method : C:\HPCHEM\1\METHODS\ODH-0320.M  
 Last changed : 4/5/2011 4:21:42 PM by JTM

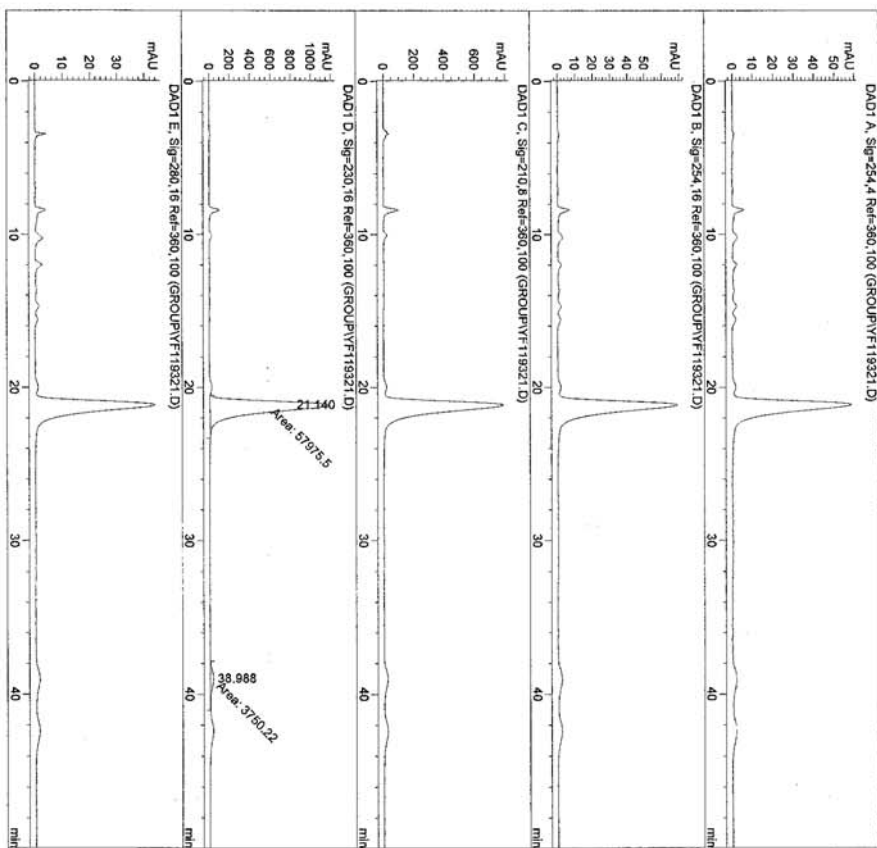

Area Percent Report

Sorted By : Signal  
 Multiplier : 1.0000  
 Dilution : 1.0000  
 Use Multiplier & Dilution Factor with ISTDs

Signal 1: DAD1 A, Sig=254,4 Ref=360,100  
 Signal 2: DAD1 B, Sig=254,16 Ref=360,100  
 Signal 3: DAD1 C, Sig=210,8 Ref=360,100  
 Signal 4: DAD1 D, Sig=230,16 Ref=360,100

| Peak # | RetTime [min] | Type | Width [min] | Area [mAU*s] | Height [mAU] | Area %  |
|--------|---------------|------|-------------|--------------|--------------|---------|
| 1      | 21.140        | RM   | 0.8197      | 5.7975e4     | 1178.73462   | 93.9244 |
| 2      | 38.988        | RM   | 1.5853      | 3750.22217   | 39.42817     | 6.0756  |

Table 5, entry 2  
 with (R)-catalyst

Totals : 6.17257e4 1218.16279

Results obtained with enhanced integrator!

Signal 5: DAD1 E, Sig=280,16 Ref=360,100

\*\*\* End of Report \*\*\*

Injection Date : 3/7/2011 8:42:51 PM  
 Sample Name : YF1120 RAC  
 Acq. Operator : JTM  
 Acq. Instrument : Instrument 1  
 Different Inj Volume from Sequence :  
 Acq. Method : C:\HPCHEM\1\METHODS\VA-0130.M  
 Last changed : 3/5/2011 3:36:54 PM by JTM  
 Analysis Method : C:\HPCHEM\1\METHODS\ODH-1040.M  
 Last changed : 3/7/2011 8:12:52 PM by JTM

Seq. Line : 2  
 Location : Vial 71  
 Inj : 1  
 Inj Volume : 5 µl  
 Actual Inj Volume : 3 µl

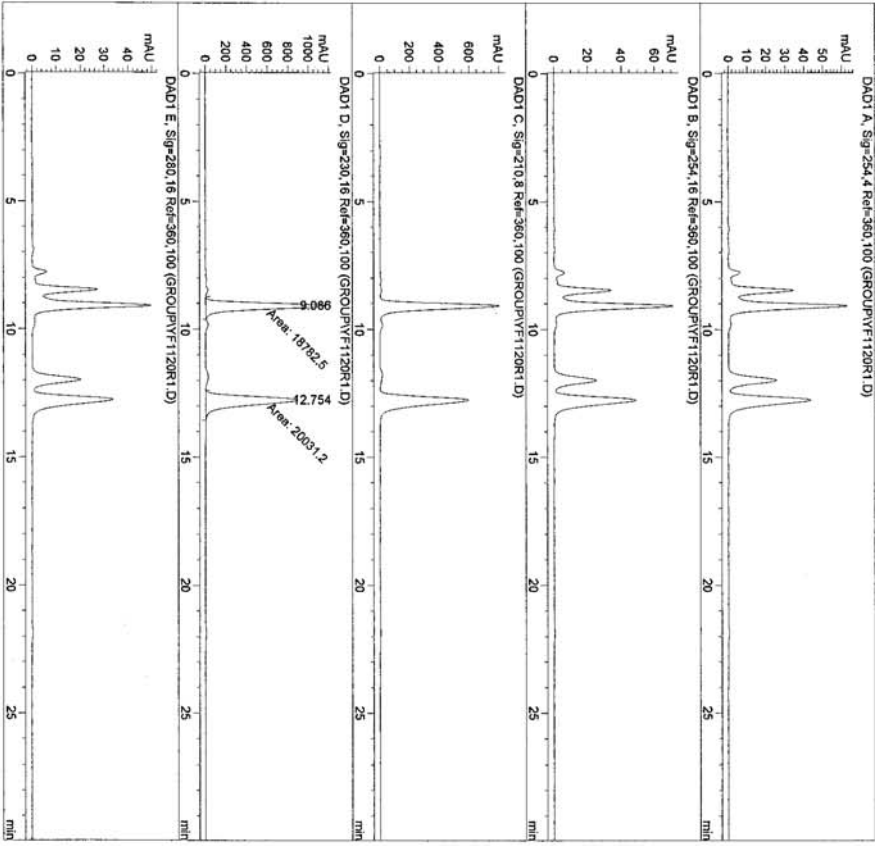

Area Percent Report

| Sorted By                                   | Signal   |
|---------------------------------------------|----------|
| Multiplier                                  | : 1.0000 |
| Dilution                                    | : 1.0000 |
| Use Multiplier & Dilution Factor with ISTDs |          |

  

| Signal                                   | RetTime [min]                              | Type | Width [min] | Area [mAU*s] | Height [mAU] | Area %  |
|------------------------------------------|--------------------------------------------|------|-------------|--------------|--------------|---------|
| Signal 1: DAD1 A, Sig=254,4 Ref=360,100  | 9.086                                      | MM   | 0.2690      | 1.87825e4    | 1163.57739   | 48.3913 |
| Signal 2: DAD1 B, Sig=254,16 Ref=360,100 | 12.754                                     | MM   | 0.3732      | 2.00312e4    | 894.48456    | 51.6087 |
| Signal 3: DAD1 C, Sig=210,8 Ref=360,100  | Totals : 3.88137e4 2058.06195              |      |             |              |              |         |
| Signal 4: DAD1 D, Sig=230,16 Ref=360,100 | Results obtained with enhanced integrator! |      |             |              |              |         |
| Signal 5: DAD1 E, Sig=280,16 Ref=360,100 | *** End of Report ***                      |      |             |              |              |         |

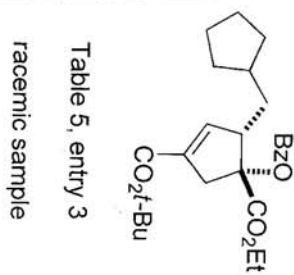



Injection Date : 3/7/2011 9:14:07 PM  
 Sample Name : YF1120 S CAT  
 Acq. Operator : JTM  
 Acq. Instrument : Instrument 1  
 Different Inj Volume from Sequence : Actual Inj Volume : 5 µl  
 Acq. Method : C:\HPCHEM\1\METHODS\IR-0130.M  
 Last changed : 3/5/2011 3:36:54 PM by JTM  
 Analysis Method : C:\HPCHEM\1\METHODS\ODR-1040.M  
 Last changed : 3/7/2011 8:12:52 PM by JTM

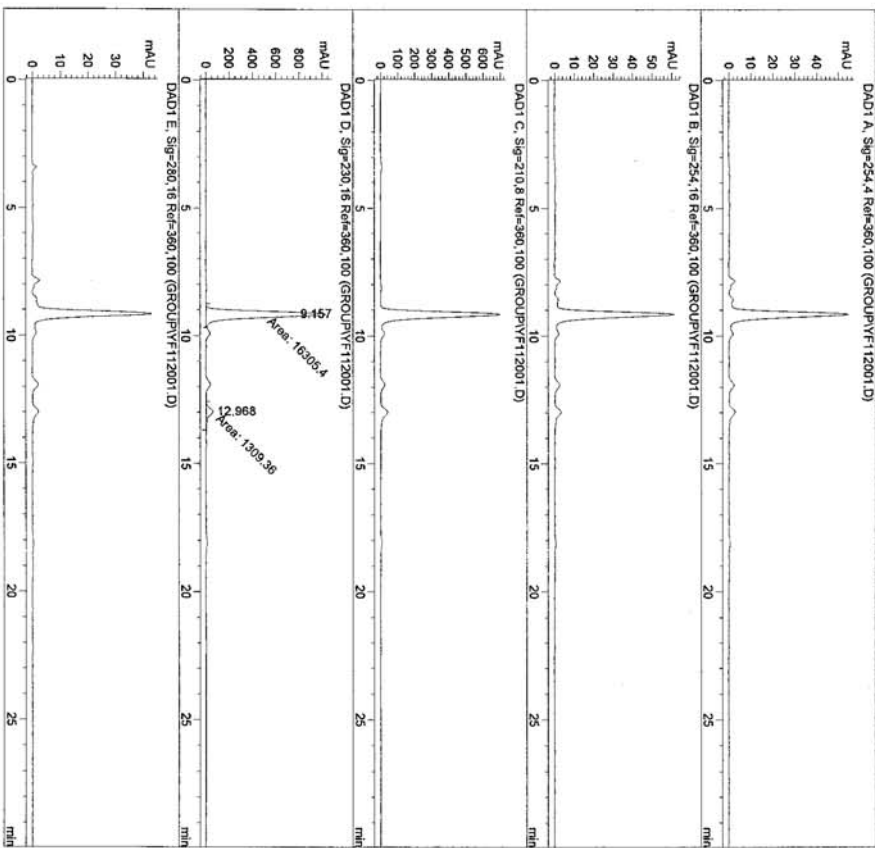

Area Percent Report  
 Sorted By : Signal  
 Multiplier : 1.0000  
 Dilution : 1.0000  
 Use Multiplier & Dilution Factor with ISTDs

| Signal                                   | Peak #                                     | RetTime [min] | Type | Width [min] | Area [mAU*s] | Height [mAU] | Area %  |
|------------------------------------------|--------------------------------------------|---------------|------|-------------|--------------|--------------|---------|
| Signal 1: DAD1 A, Sig=254,4 Ref=360,100  | 1                                          | 9.157         | MF   | 0.2632      | 1.63054e4    | 1032.31580   | 92.5667 |
| Signal 2: DAD1 B, Sig=254,16 Ref=360,100 | 2                                          | 12.968        | MF   | 0.3638      | 1309.36438   | 59.98289     | 7.4333  |
| Signal 3: DAD1 C, Sig=210,8 Ref=360,100  | Totals : 1.76148e4 1092.29868              |               |      |             |              |              |         |
| Signal 4: DAD1 D, Sig=230,16 Ref=360,100 | Results obtained with enhanced integrator: |               |      |             |              |              |         |
| Signal 5: DAD1 E, Sig=280,16 Ref=360,100 | *** End of Report ***                      |               |      |             |              |              |         |

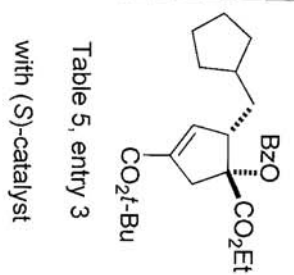

Injection Date : 3/7/2011 9:45:22 PM      Seq. Line : 4  
 Sample Name : YF1120 R CAT                    Location : Vial 73  
 Acq. Operator : JTM                            Inj : 1  
 Acq. Instrument : Instrument 1                Inj Volume : 5 µl  
 Diluent Inj Volume from Sequence 1        Inj Volume : 3 µl  
 Acq. Method : C:\HPCHEM\METHODS\VA-0130.M  
 Last Changed : 3/5/2011 3:36:54 PM by JTM  
 Analysis Method : C:\HPCHEM\METHODS\OIH-1040.M  
 Last changed : 3/7/2011 8:12:52 PM by JTM

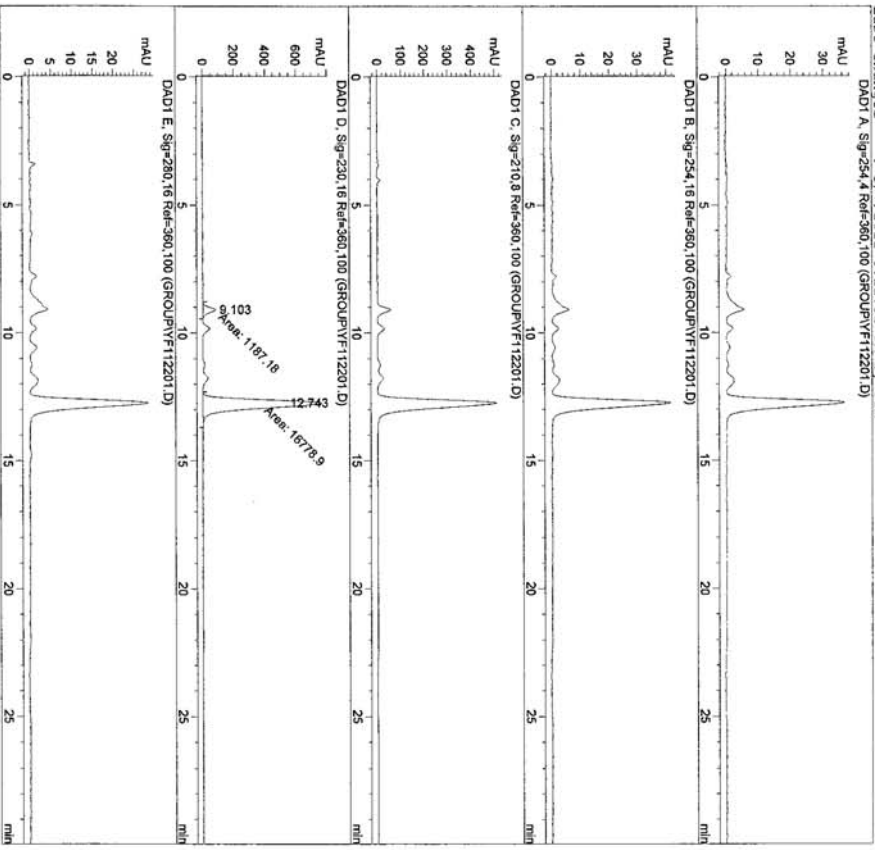

Area Percent Report

Sorted By : Signal  
 Multiplier : 1.0000  
 Dilution : 1.0000  
 Use Multiplier & Dilution Factor with ISTDs

Signal 1: DAD1 A, Sig=254,4 Ref=360,100

Signal 2: DAD1 B, Sig=254,16 Ref=360,100

Signal 3: DAD1 C, Sig=210,8 Ref=360,100

Signal 4: DAD1 D, Sig=230,16 Ref=360,100

| Peak #   | RetTime [min] | Type | Width [min] | Area [mAU*s] | Height [mAU] | Area %  |
|----------|---------------|------|-------------|--------------|--------------|---------|
| 1        | 9.103         | MM   | 0.2422      | 1187.17957   | 81.69284     | 6.6079  |
| 2        | 12.743        | MM   | 1.67789e4   | 770.67529    | 93.3921      | 93.3921 |
| Totals : |               |      |             | 1.79660e4    | 852.36813    |         |

Results obtained with enhanced integrator:

Signal 5: DAD1 E, Sig=280,16 Ref=360,100

\*\*\* End of Report \*\*\*

Table 5, entry 3  
with (R)-catalyst

Acq. Operator : ATP  
 Acq. Instrument : Instrument 1  
 Injection Date : 2/28/2011 3:56:46 PM  
 Seg. Line : 11  
 Location : Vial 26  
 Inj : 1  
 Inj Volume : 1 µl  
 Actual Inj Volume : 3 µl  
 Different Inj Volume from Sequence :  
 Acq. Method : C:\CHEM32\1\DATA\VFUJIMARA\ELLIOT-S2 2011-02-28 10-07-11\VD-H01-30.M  
 Last changed : 2/26/2011 9:31:41 AM by ATP  
 Analysis Method : C:\CHEM32\1\METHODS\VD-H03-30.M  
 Last changed : 2/28/2011 12:54:42 PM by ATP  
 DA c/w/w/w.

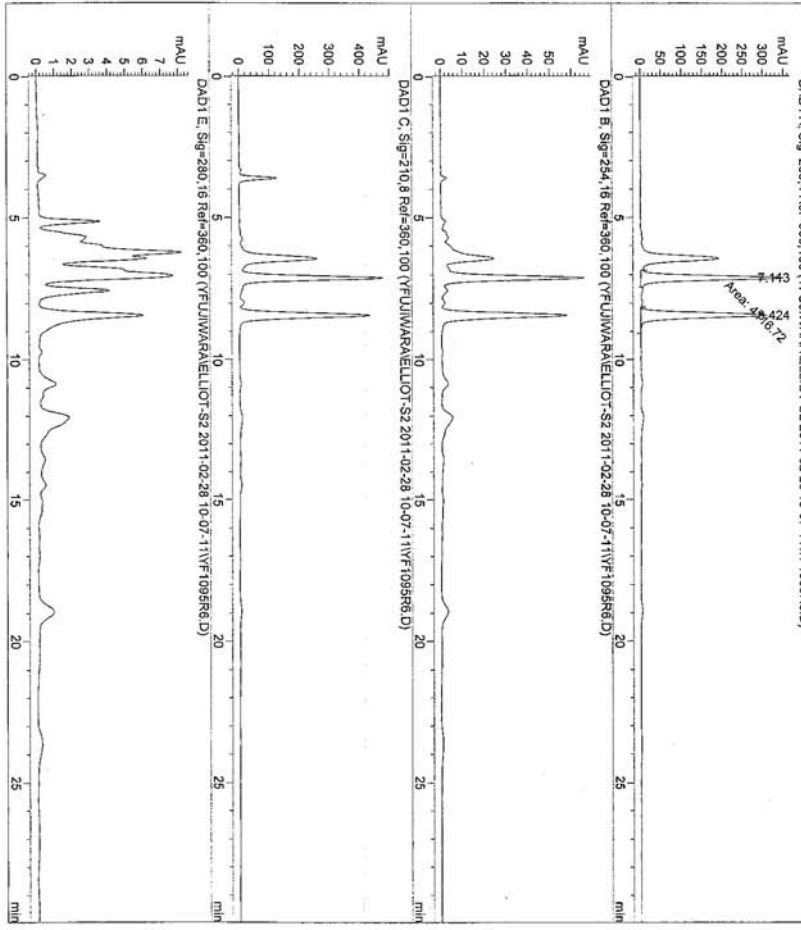

Area Percent Report  
 Sorted By : Signal  
 Multiplier: : 1.0000  
 Dilution: : 1.0000  
 Use Multiplier & Dilution Factor with ISTDs

| Peak #   | RetTime [min] | Type | Width [min] | Area [mAU*s] | Height [mAU] | Area %  |
|----------|---------------|------|-------------|--------------|--------------|---------|
| 1        | 7.113         | EM   | 0.1966      | 4116.71875   | 348.91183    | 50.7636 |
| 2        | 8.424         | VB   | 0.2009      | 3992.86377   | 308.66205    | 49.2364 |
| Totals : |               |      |             | 8109.58252   | 657.57388    |         |

Signal 2: DAD1 B, Sig=254,16 Ref=360,100  
 Signal 3: DAD1 C, Sig=210,8 Ref=360,100  
 Signal 4: DAD1 E, Sig=280,16 Ref=360,100

\*\*\* End of Report \*\*\*

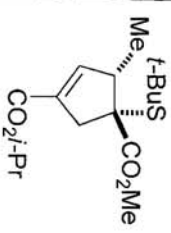

Table 6, entry 1  
 racemic sample

Acc. Operator : ATP  
 Acq. Instrument : Instrument 1  
 Injection Date : 2/28/2011 4:28:03 PM  
 Seq. Line : 12  
 Location : Vial 27  
 Inj : 1  
 Inj Volume : 1 µl  
 Actual Inj Volume : 3 µl  
 Different Inj Volume from Sequence 1  
 Acq. Method : C:\CHEM32\1\DATA\VFUJIKARA\ELLIOT-S2 2011-02-28 10-07-11\MS-H01-30.M  
 Last changed : 2/26/2011 9:31:41 AM by ATP  
 Analysis Method : C:\CHEM32\1\METHODS\AD-H05-30.M  
 Last changed : 2/28/2011 12:54:42 PM by ATP  
 DAD1 A, Sig=230,4 Ref=360,100 (VFUJIKARA\ELLIOT-S2 2011-02-28 10-07-11\VF109506.D)

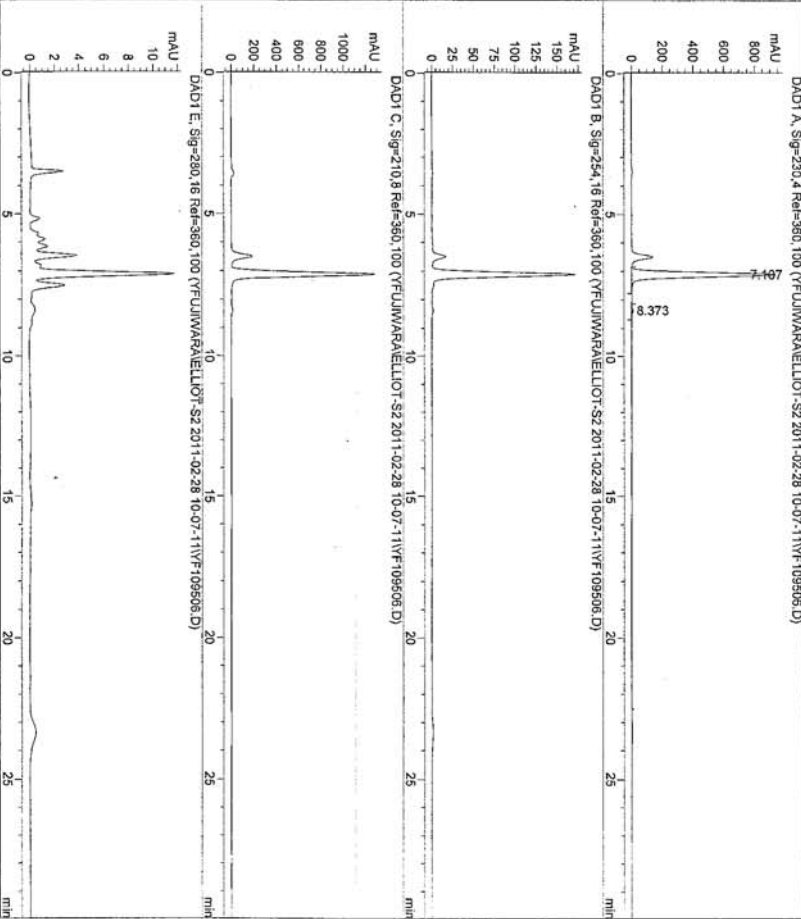

Area Percent Report

Sorted By : Signal  
 Multiplier: : 1.0000  
 Dilution: : 1.0000  
 Use Multiplier & Dilution Factor with ISTDs

| Peak #   | RetTime [min] | Type | Width [min] | Area [mAU*s] | Height [mAU] | Area %  |
|----------|---------------|------|-------------|--------------|--------------|---------|
| 1        | 7.107         | VB   | 0.1733      | 1.05289e4    | 935.58063    | 98.7731 |
| 2        | 8.373         | VB   | 0.2086      | 130.78296    | 9.62103      | 1.2269  |
| Totals : |               |      |             | 1.06597e4    | 945.20166    |         |

Signal 2: DAD1 B, Sig=234,16 Ref=360,100  
 Signal 3: DAD1 C, Sig=210,8 Ref=360,100  
 Signal 4: DAD1 E, Sig=280,16 Ref=360,100

\*\*\* End of Report \*\*\*

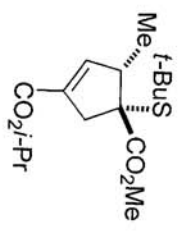

Table 6, entry 1  
 with (S)-catalyst

Acq. Operator : ATP  
 Acq. Instrument : Instrument 1  
 Injection Date : 2/28/2011 4:59:19 PM  
 Seq. Line : 13  
 Location : Vial 28  
 Inj : 1  
 Inj Volume : 1 µl  
 Actual Inj Volume : 3 µl  
 Different Inj Volume from Sequence !  
 Acq. Method : C:\CHEM32\1\DATA\YFUJIMARA\ELLIOT-S2 2011-02-28 10-07-11\AD-H01-30.M  
 Last changed : 2/26/2011 9:31:41 AM by ATP  
 Analysis Method : C:\CHEM32\1\METHODS\AD-H05-30.M  
 Last changed : 2/28/2011 12:54:42 PM by ATP  
 Last changed : 2/28/2011 12:54:42 PM by ATP

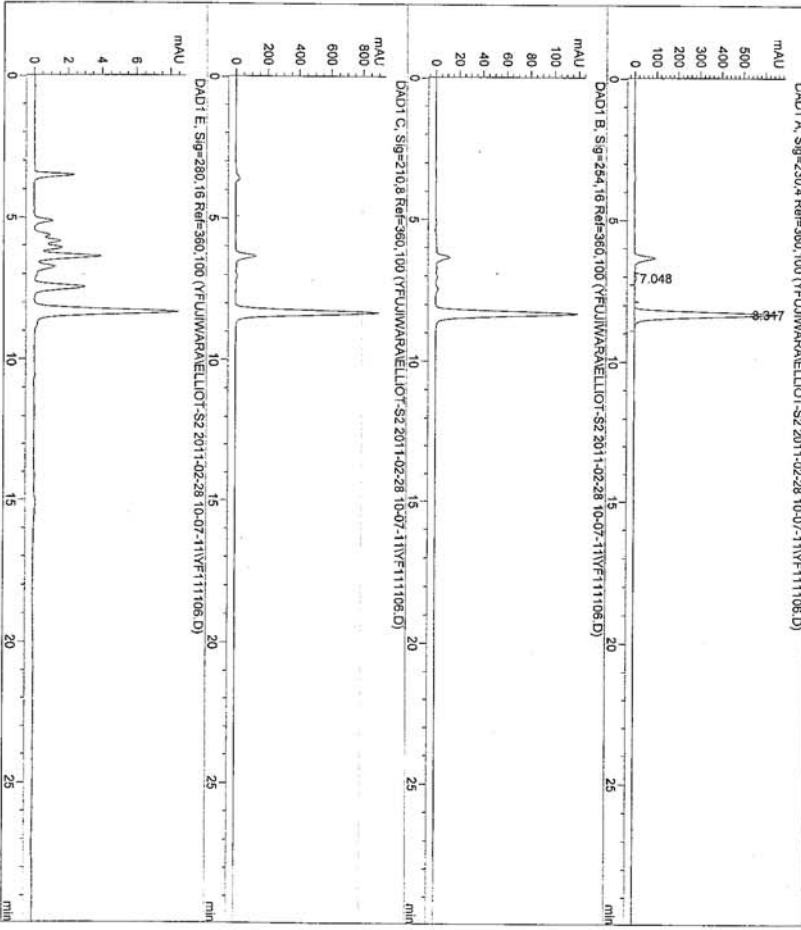

Area Percent Report  
 Sorted By : Signal  
 Multiplier : 1.0000  
 Dilution : 1.0000  
 Use Multiplier & Dilution Factor with ISTDs

| Peak #   | RetTime [min] | Type | Width [min] | Area [mAU*s] | Height [mAU] | Area %  |
|----------|---------------|------|-------------|--------------|--------------|---------|
| 1        | 7.048         | VB   | 0.1783      | 96.27586     | 8.36081      | 1.1435  |
| 2        | 8.317         | VB   | 0.1963      | 8323.41406   | 654.87170    | 98.8565 |
| Totals : |               |      |             | 8419.68993   | 663.23252    |         |

Table 6, entry 1  
 with (R)-catalyst

Signal 1: DAD1 A, Sig=230,4 Ref=360,100  
 Signal 2: DAD1 B, Sig=254,16 Ref=360,100  
 Signal 3: DAD1 C, Sig=210,8 Ref=360,100  
 Signal 4: DAD1 E, Sig=280,16 Ref=360,100  
 \*\*\* End of Report \*\*\*

Injection Date : 3/2/2011 11:28:47 PM  
 Sample Name : VF1103 RAC  
 Seq. Line : 5  
 Location : Vial 53  
 Acq. Operator : JTM  
 Acq. Instrument : Instrument 1  
 Inj Volume : 5 µl  
 Different Inj Volume from Sequence :  
 Actual Inj Volume : 3 µl  
 Acq. Method : C:\HPCHEM\1\METHODS\IA-0440.M  
 Last changed : 3/2/2011 10:07:23 PM by JTM  
 Analysis Method : C:\HPCHEM\1\METHODS\ADH-1020.M  
 Last changed : 3/2/2011 10:10:29 PM by JTM

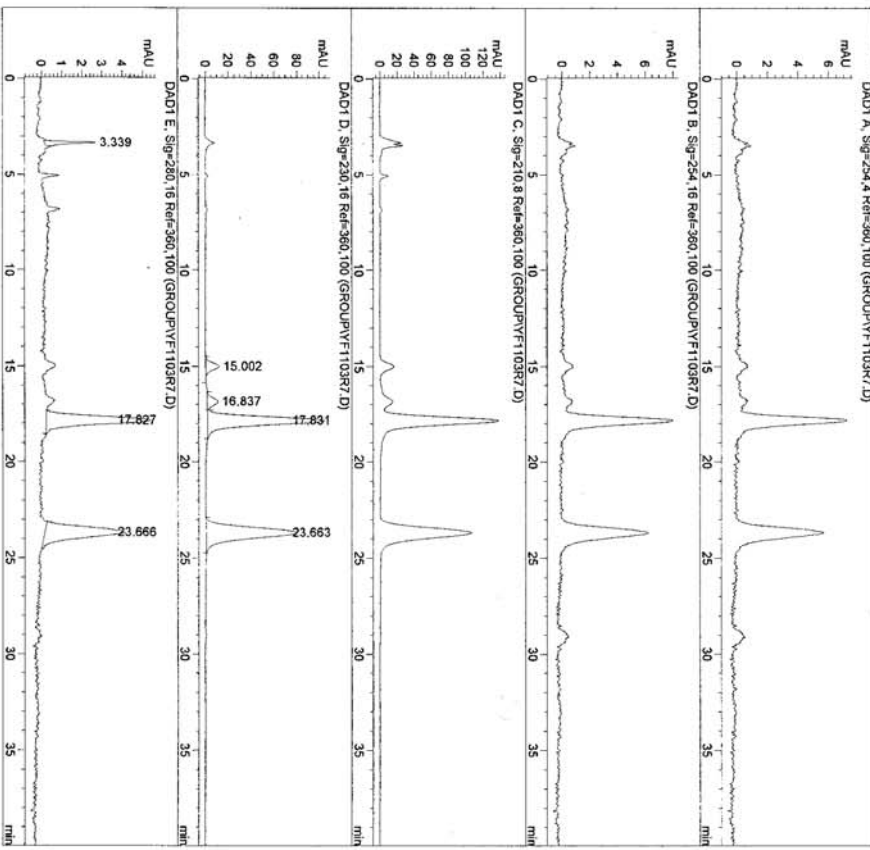

Area Percent Report  
 Sorted By : Signal  
 Multiplier : 1.0000  
 Dilution :  
 Use Multiplier & Dilution Factor with ISTDs

| Signal                                   | RetTime | Type | Width  | Area       | Height    | Area %  |
|------------------------------------------|---------|------|--------|------------|-----------|---------|
| Signal 1: DAD1 A, Sig=254,4 Ref=360,100  | 15.002  | BP   | 0.3640 | 299.83340  | 11.89622  | 4.5204  |
| Signal 2: DAD1 B, Sig=254,16 Ref=360,100 | 16.837  | BV   | 0.3665 | 268.95212  | 9.61097   | 4.0549  |
| Signal 3: DAD1 C, Sig=210,8 Ref=360,100  | 17.831  | VB   | 0.4462 | 3007.47852 | 103.15027 | 45.3423 |
| Signal 4: DAD1 D, Sig=230,16 Ref=360,100 | 23.663  | BB   | 0.5779 | 3056.56714 | 79.97822  | 46.0824 |
| Totals :                                 |         |      |        | 6632.8318  | 204.63568 |         |

Results obtained with enhanced integrator:  
 Signal 5: DAD1 E, Sig=280,16 Ref=360,100

| Peak #   | RetTime [min] | Type | Width [min] | Area [mAU*s] | Height [mAU] | Area %  |
|----------|---------------|------|-------------|--------------|--------------|---------|
| 1        | 3.339         | BB   | 0.1198      | 20.97638     | 2.35363      | 6.7858  |
| 2        | 17.827        | BB   | 0.4010      | 145.37054    | 5.15454      | 47.0267 |
| 3        | 23.666        | BB   | 0.4409      | 142.77673    | 4.01493      | 46.1876 |
| Totals : |               |      |             | 309.12365    | 11.72509     |         |

Results obtained with enhanced integrator:  
 \*\*\* End of Report \*\*\*

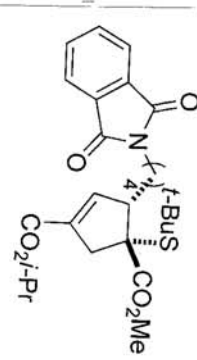

Table 6, entry 2  
 racemic sample

Injection Date : 3/3/2011 12:10:06 AM  
 Sample Name : YF1103 S-cat  
 Acq. Operator : JTM  
 Acq. Instrument : Instrument 1  
 Different Inj Volume from Sequence : Actual Inj Volume : 5 µl  
 Acq. Method : C:\HPCHEM\1\METHODS\VA-0440.M  
 Last changed : 3/2/2011 10:07:23 PM by JTM  
 Analysis Method : C:\HPCHEM\1\METHODS\ADH-1020.M  
 Last changed : 3/2/2011 10:10:29 PM by JTM

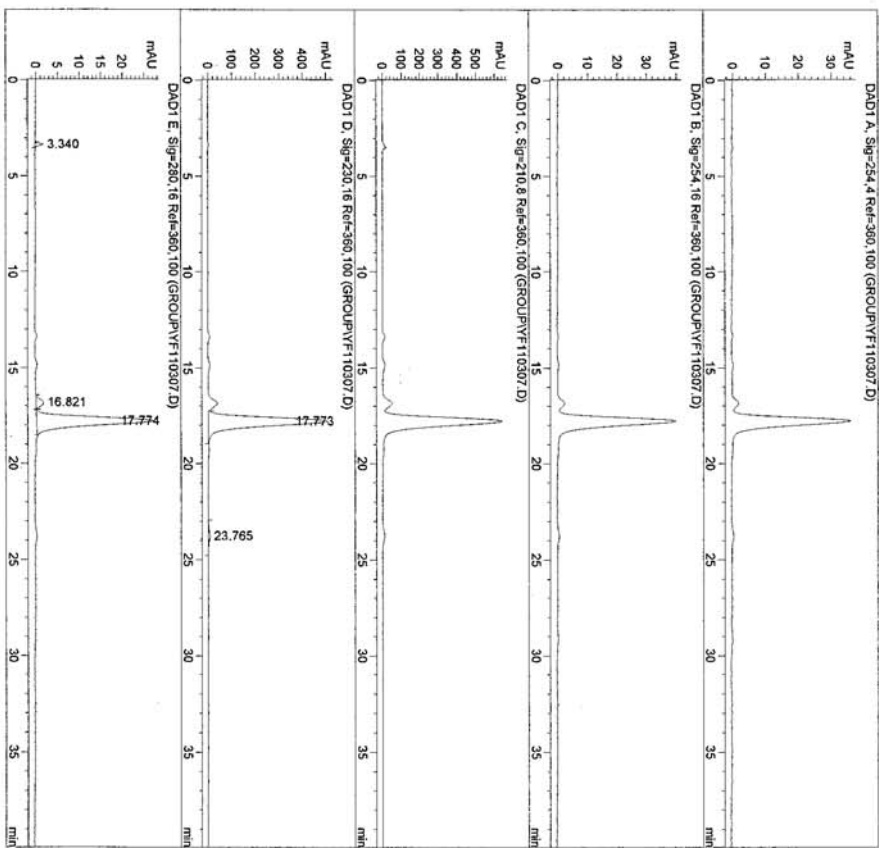

Area Percent Report  
 Sorted By : Signal  
 Multiplier : 1.0000  
 Dilution :  
 Use Multiplier & Dilution Factor with ISTDs

| Signal                                   | Peak #                       | Retention Time (min) | Width (min) | Area (mAU*s) | Height (mAU) | Area %  |
|------------------------------------------|------------------------------|----------------------|-------------|--------------|--------------|---------|
| Signal 1: DAD1 A, Sig=254,4 Ref=360,100  | 1                            | 3.340                | 0.1107      | 13.32599     | 1.87888      | 1.5857  |
| Signal 2: DAD1 B, Sig=254,16 Ref=360,100 | 2                            | 16.821               | 0.3032      | 42.70980     | 1.78479      | 5.0822  |
| Signal 3: DAD1 C, Sig=210,8 Ref=360,100  | 3                            | 17.774               | 0.4363      | 784.34705    | 27.04794     | 93.3321 |
| Signal 4: DAD1 D, Sig=230,16 Ref=360,100 | Totals : 1.57665e4 516.89424 |                      |             |              |              |         |

Results obtained with enhanced integrator:  
 Signal 5: DAD1 E, Sig=280,16 Ref=360,100

| Peak #   | Retention Time (min) | Type | Width (min) | Area (mAU*s) | Height (mAU) | Area %             |
|----------|----------------------|------|-------------|--------------|--------------|--------------------|
| 1        | 3.340                | BB   | 0.1107      | 13.32599     | 1.87888      | 1.5857             |
| 2        | 16.821               | BV   | 0.3032      | 42.70980     | 1.78479      | 5.0822             |
| 3        | 17.774               | VB   | 0.4363      | 784.34705    | 27.04794     | 93.3321            |
| Totals : |                      |      |             |              |              | 840.38284 30.71161 |

Results obtained with enhanced integrator:  
 \*\*\* End of Report \*\*\*

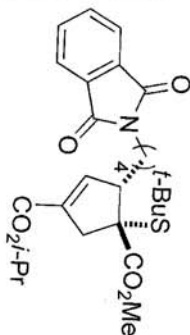

Table 6, entry 2  
 with (S)-catalyst

Injection Date : 3/3/2011 12:51:25 AM  
 Sample Name : YF1103 R-cat  
 Acq. Operator : JTM  
 Acq. Instrument : Instrument 1  
 Different Inj Volume from Sequence :  
 Acq. Method : C:\HPCHEM\1\METHODS\VA-0440.M  
 Last changed : 3/2/2011 10:07:23 PM by JTM  
 Analysis Method : C:\HPCHEM\1\METHODS\ADH-1020.M  
 Last changed : 3/2/2011 10:10:23 PM by JTM  
 DAD1 A, Sig=254,4 Ref=360,100 (GROUP\YF110507.D)

Sed. Line : 7  
 Location : Vial 55  
 Inj : 1  
 Inj Volume : 5 µl  
 Actual Inj Volume : 3 µl

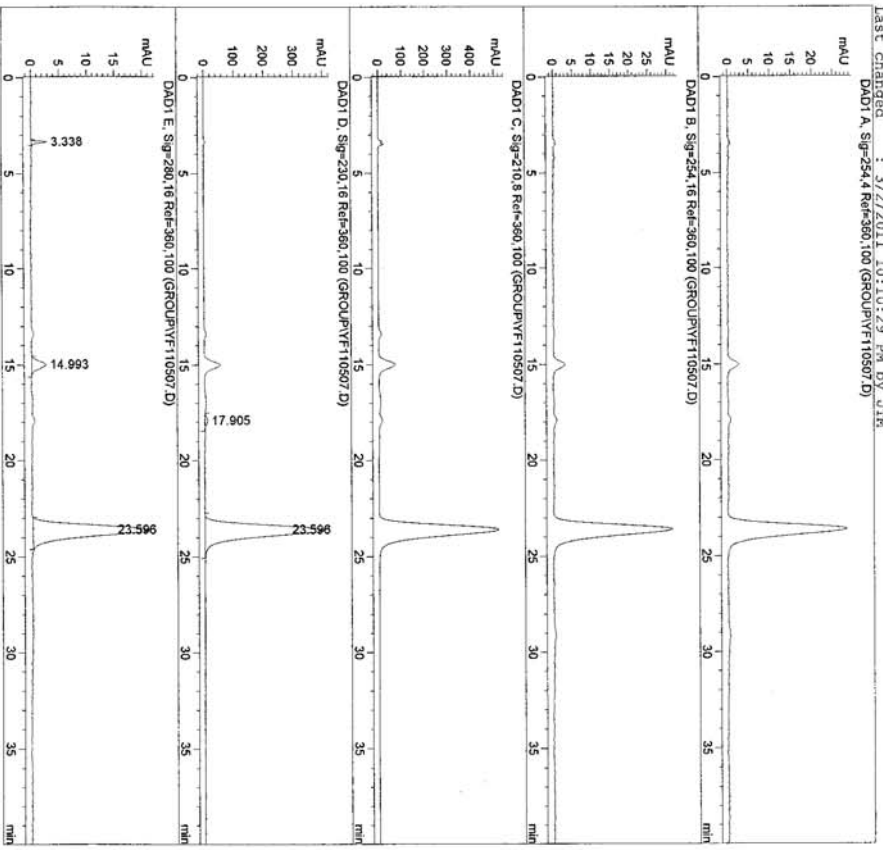

Area Percent Report

Sorted By : Signal  
 Multiplier : 1.0000  
 Dilution : 1.0000  
 Use Multiplier & Dilution Factor with ISTDs

Signal 1: DAD1 A, Sig=254,4 Ref=360,100

Signal 2: DAD1 B, Sig=254,16 Ref=360,100

Signal 3: DAD1 C, Sig=210,8 Ref=360,100

Signal 4: DAD1 D, Sig=230,16 Ref=360,100

| Peak #   | RetTime [min] | Type | Width [min] | Area [mAU*s] | Height [mAU] | Area %  |
|----------|---------------|------|-------------|--------------|--------------|---------|
| 1        | 17.905        | VP   | 0.3508      | 266.56589    | 9.75396      | 1.6419  |
| 2        | 23.596        | FB   | 0.6066      | 1.59688e4    | 402.73621    | 98.3581 |
| Totals : |               |      |             | 1.62354e4    | 412.49016    |         |

Results obtained with enhanced integrator:

Signal 5: DAD1 E, Sig=280,16 Ref=360,100

| Peak #   | RetTime [min] | Type | Width [min] | Area [mAU*s] | Height [mAU] | Area %  |
|----------|---------------|------|-------------|--------------|--------------|---------|
| 1        | 3.338         | BB   | 0.1144      | 20.84478     | 2.81426      | 2.3177  |
| 2        | 14.993        | BP   | 0.3461      | 68.26148     | 2.55201      | 7.5898  |
| 3        | 23.596        | BB   | 0.5476      | 810.27417    | 21.11805     | 90.0925 |
| Totals : |               |      |             | 899.38043    | 26.48432     |         |

Results obtained with enhanced integrator:

\*\*\* End of Report \*\*\*

Table 6, entry 2  
 with (R)-catalyst



Injection Date : 3/5/2011 11:22:50 PM  
 Sample Name : YF1118 RAC  
 Acq. Operator : JTM  
 Acq. Instrument : Instrument 1  
 Acq. Method : C:\HPCHEM\1\METHODS\ADH-0130.M  
 Last changed : 1/17/2011 9:04:38 AM by JTM  
 Analysis Method : C:\HPCHEM\1\METHODS\AS00320.M  
 Last changed : 3/6/2011 12:10:21 PM by JTM  
 I:1 IEM:Hexanes

Seq. Line : 21  
 Location : Vial 74  
 Inj : 1  
 Inj Volume : 5 µl

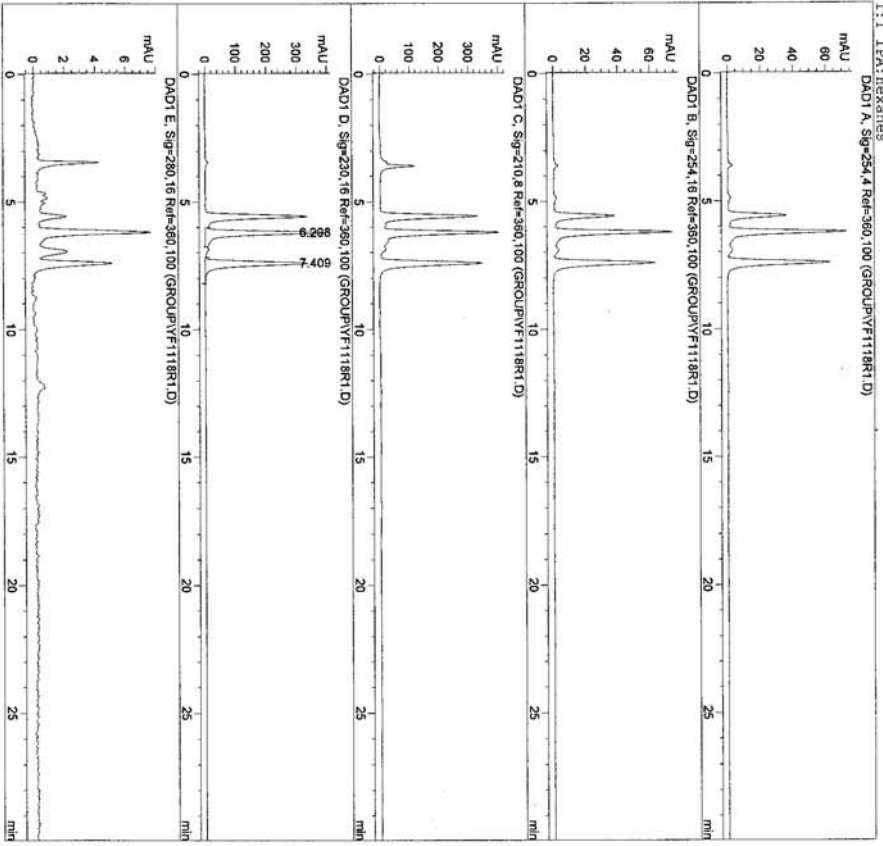

Area Percent Report  
 Sorted By : Signal  
 Multiplier : 1.0000  
 Dilution : 1.0000  
 Use Multiplier & Dilution Factor with ISTDs

| Signal                                   | RetTime [min] | Type | Width [min] | Area [mAU*s] | Height [mAU] | Area %  |
|------------------------------------------|---------------|------|-------------|--------------|--------------|---------|
| Signal 1: DAD1 A, Sig=254, 4 Ref=360,100 | 6.208         | VV   | 0.1700      | 4454.23926   | 393.69000    | 50.7404 |
| Signal 2: DAD1 B, Sig=254,16 Ref=360,100 | 7.409         | VW   | 0.1948      | 4324.23926   | 339.03305    | 49.2596 |
| Signal 3: DAD1 C, Sig=210,8 Ref=360,100  |               |      |             |              |              |         |
| Signal 4: DAD1 D, Sig=230,16 Ref=360,100 |               |      |             |              |              |         |
| Totals :                                 |               |      |             | 8778.47852   | 732.72305    |         |

Results obtained with enhanced integrator:  
 Signal 5: DAD1 E, Sig=280,16 Ref=360,100

\*\*\* End of Report \*\*\*

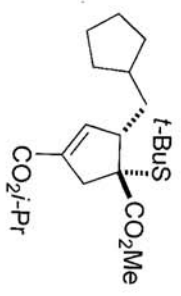

Table 6, entry 3  
 racemic sample

Injection Date : 3/5/2011 11:54:10 PM  
 Sample Name : YF1118 S-cat  
 Acq. Operator : JTM  
 Acq. Instrument : Instrument 1  
 Acq. Method : C:\HPCHEM\1\METHODS\ADH-0130.M  
 Last changed : 1/1/2011 9:04:38 AM by JTM  
 Analysis Method : C:\HPCHEM\1\METHODS\AS00320.M  
 Last changed : 3/6/2011 12:10:21 PM by JTM  
 Inj Volume : 5 µl  
 Location : Vial 75  
 Seq. Line : 22

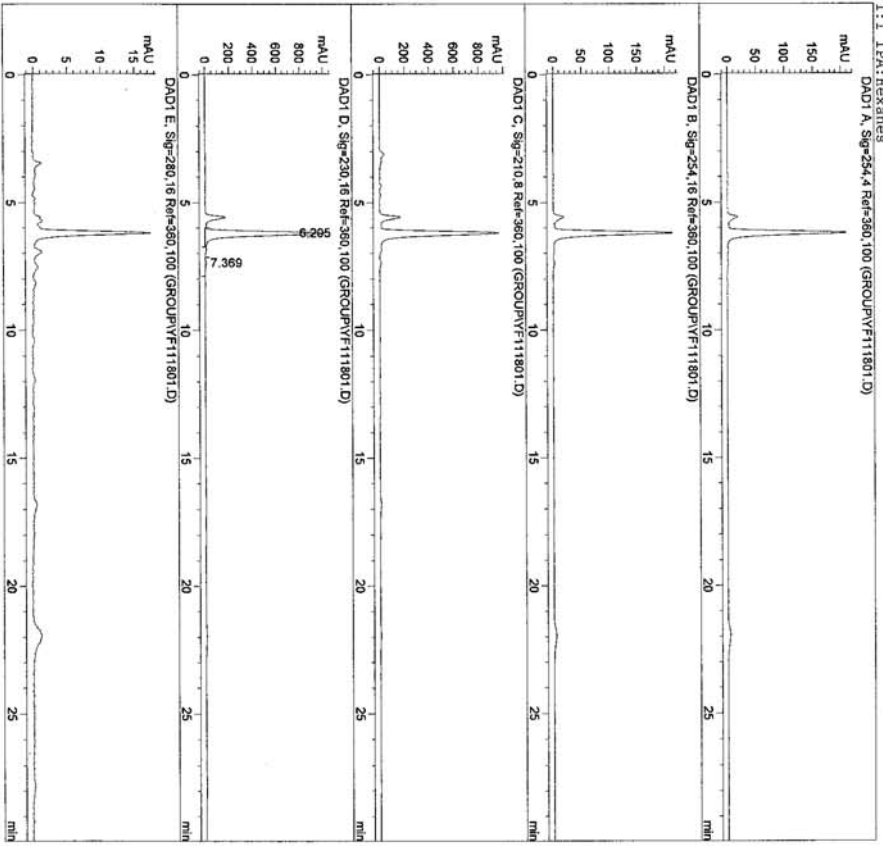

Area Percent Report  
 Sorted By : Signal  
 Multiplier : 1.0000  
 Dilution : 1.0000  
 Use Multiplier & Dilution Factor with ISTDs

| Signal                                     | Peak #                                     | RetTime [min] | Type | Width [min] | Area [mAU*s] | Height [mAU] | Area %  |
|--------------------------------------------|--------------------------------------------|---------------|------|-------------|--------------|--------------|---------|
| Signal 1: DAD1 A, Sig=254, 4 Ref=360, 100  | 1                                          | 6.205         | PV   | 0.1794      | 1.1820964    | 1018.26752   | 98.5926 |
| Signal 2: DAD1 B, Sig=254, 16 Ref=360, 100 | 2                                          | 7.369         | VN   | 0.2095      | 168.74585    | 11.61742     | 1.4074  |
| Signal 3: DAD1 C, Sig=210, 8 Ref=360, 100  | Totals : 1.19897e4 1029.88493              |               |      |             |              |              |         |
| Signal 4: DAD1 D, Sig=230, 16 Ref=360, 100 | Results obtained with enhanced integrator: |               |      |             |              |              |         |
| Signal 5: DAD1 E, Sig=280, 16 Ref=360, 100 | *** End of Report ***                      |               |      |             |              |              |         |

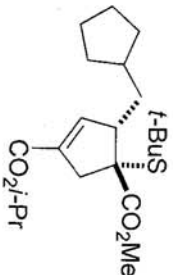

Table 6, entry 3  
 with (S)-catalyst

Injection Date : 3/6/2011 12:25:30 AM  
 Sample Name : YF1119 R-cat  
 Acq. Operator : JTM  
 Acq. Instrument : Instrument 1  
 Acq. Method : C:\HECHEM\1\METHODS\ADH-0130.M  
 Last changed : 1/1/2011 9:04:38 AM by JTM  
 Analysis Method : C:\HECHEM\1\METHODS\AS00320.M  
 Last changed : 3/6/2011 12:10:21 PM by JTM  
 1:1 IRN:Hexanes

Seq. Line : 23  
 Location : Vial 76  
 Inj : 1  
 Inj Volume : 5 µl

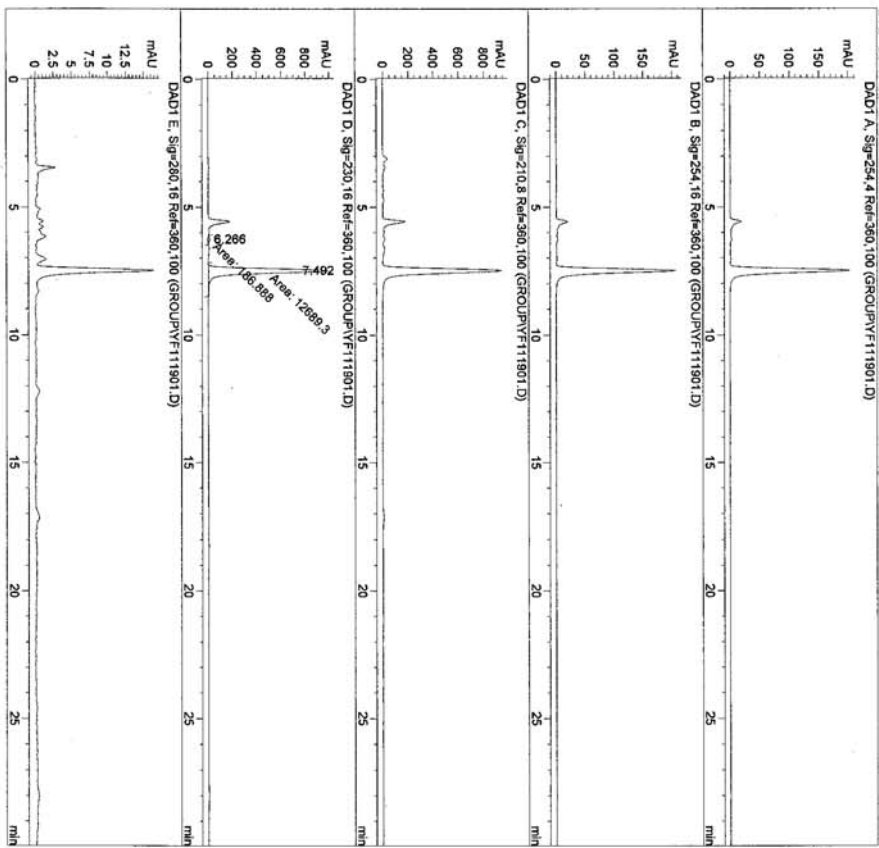

Area Percent Report  
 Sorted By : Signal  
 Multiplier : 1.0000  
 Dilution : 1.0000  
 Use Multiplier & Dilution Factor with ISTDs

| Signal                                    | Peak #                                     | RetTime [min] | Type | Width [min] | Area [mAU*s] | Height [mAU] | Area %  |
|-------------------------------------------|--------------------------------------------|---------------|------|-------------|--------------|--------------|---------|
| Signal 1: DAD1 A, Sig=254, 4 Ref=360,100  | 1                                          | 6.266         | PM   | 0.1947      | 186.88757    | 16.00057     | 1.4514  |
| Signal 2: DAD1 B, Sig=254, 16 Ref=360,100 | 2                                          | 7.492         | MM   | 0.2136      | 1.26893e4    | 990.24139    | 98.5486 |
| Signal 3: DAD1 C, Sig=210, 8 Ref=360,100  | Totals : 1.28762e4 1006.24197              |               |      |             |              |              |         |
| Signal 4: DAD1 D, Sig=230, 16 Ref=360,100 | Results obtained with enhanced integrator: |               |      |             |              |              |         |
| Signal 5: DAD1 E, Sig=280, 16 Ref=360,100 | *** End of Report ***                      |               |      |             |              |              |         |

Table 6, entry 3  
 with (R)-catalyst

Injection Date : 5/3/2011 12:08:37 PM      Seq. Line : 58  
 Sample Name : Reinreb RAC                      Location : Vial 31  
 Acq. Operator : NB                              Inj : 1  
 Acq. Instrument : Instrument 1                Inj Volume : 15 µl  
 Different Inj Volume from Sequence :      Inj Volume : 3 µl  
 Acq. Method : C:\HPCHEM\1\METHODS\IB-15-30.M  
 Last changed : 4/7/2011 9:46:30 PM by CC  
 Analysis Method : C:\HPCHEM\1\METHODS\AS-00730.M  
 Last changed : 5/3/2011 12:23:07 PM by CC

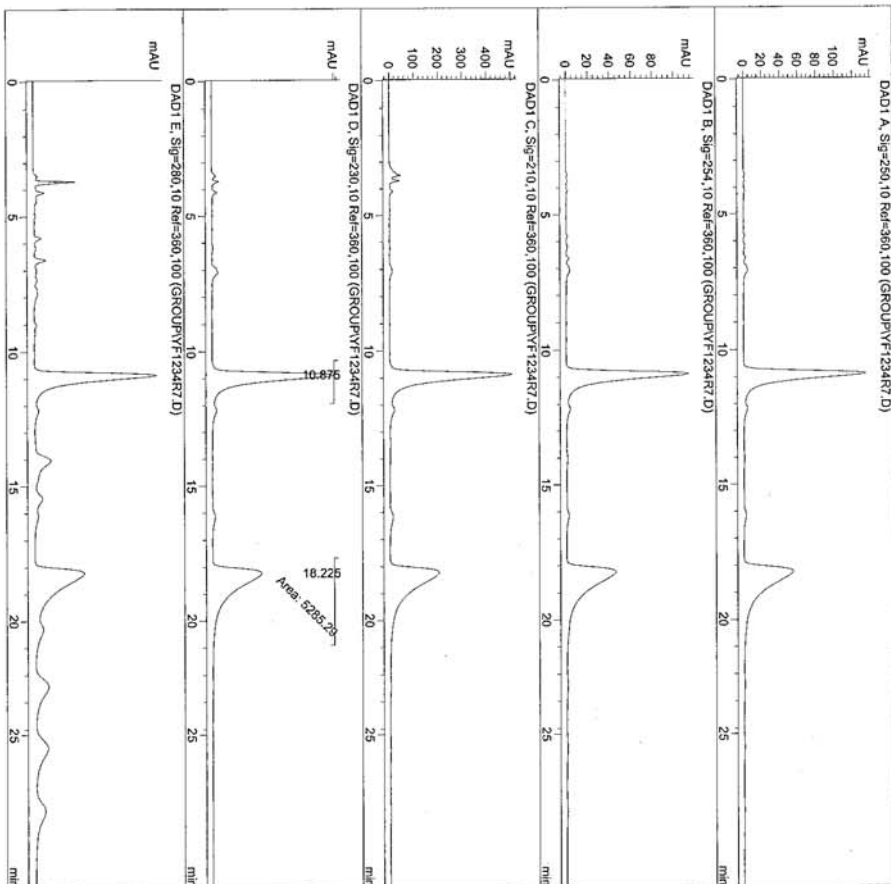

Area Percent Report

| Sorted By                                   | Signal |
|---------------------------------------------|--------|
| Multiplier                                  | 1.0000 |
| Dilution                                    | 1.0000 |
| Use Multiplier & Dilution Factor with ISTDs |        |

| Signal    | RetTime | Type       | Width       | Area       | Height    | Area %  |
|-----------|---------|------------|-------------|------------|-----------|---------|
| Signal 1: | DAD1 A, | Sig=250,10 | Ref=360,100 |            |           |         |
| Signal 2: | DAD1 B, | Sig=254,10 | Ref=360,100 |            |           |         |
| Signal 3: | DAD1 C, | Sig=210,10 | Ref=360,100 |            |           |         |
| Signal 4: | DAD1 D, | Sig=230,10 | Ref=360,100 |            |           |         |
| 1         | 10.875  | BB         | 0.3345      | 5388.98145 | 235.95155 | 50.4857 |
| 2         | 18.225  | NM         | 0.9319      | 5285.28564 | 94.52305  | 49.5143 |
| Totals :  |         |            |             | 1.06743e4  | 330.47460 |         |

Results obtained with enhanced integrator:  
 Signal 5: DAD1 E, Sig=280,10 Ref=360,100  
 \*\*\* End of Report \*\*\*

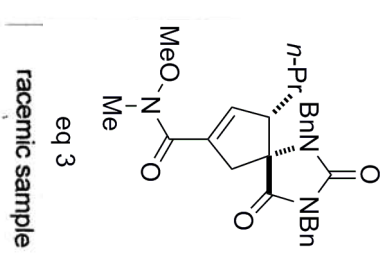

Injection Date : 5/3/2011 12:40:23 PM  
 Sample Name : Weinreb S  
 Acq. Operator : NB  
 Acq. Instrument : Instrument 1  
 Different Inj Volume from Sequence :  
 Acq. Method : C:\HPCHEM\1\METHODS\IB-15-30.M  
 Last changed : 4/7/2011 9:46:30 PM by CC  
 Analysis Method : C:\HPCHEM\1\METHODS\AS-00730.M  
 Last changed : 5/3/2011 12:23:07 PM by CC

Seq. Line : 1  
 Location : Vial 32  
 Inj : 1  
 Inj Volume : 15 µl  
 Actual Inj Volume : 3 µl

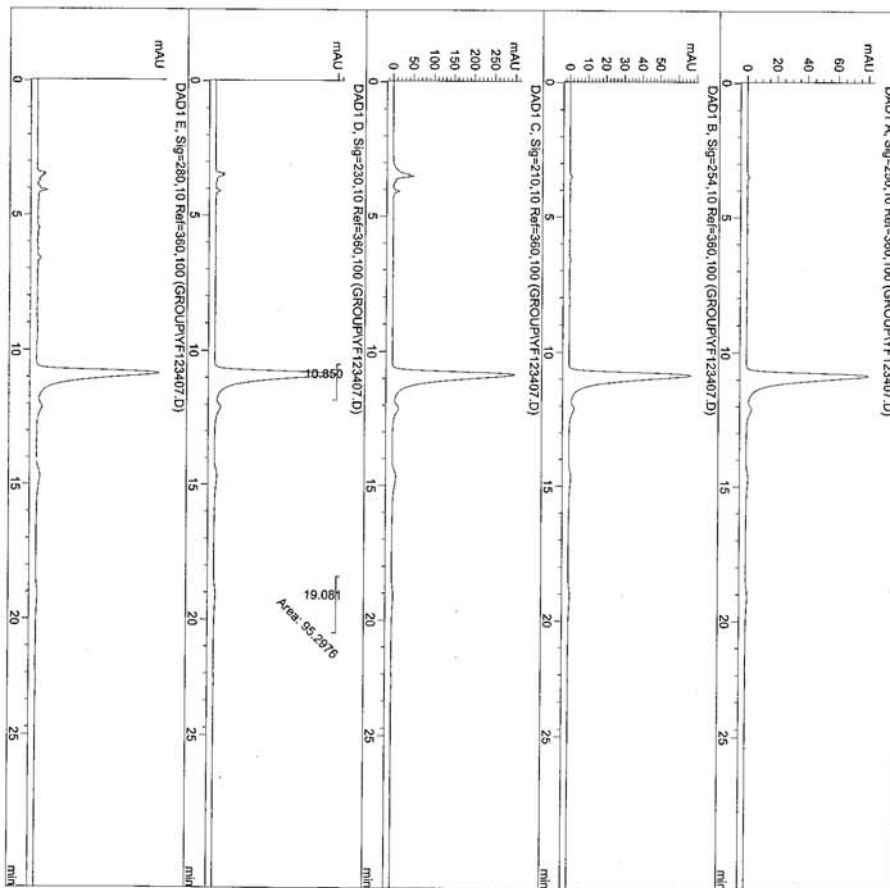

Area Percent Report  
 Sorted By : Signal  
 Multiplier : 1.0000  
 Dilution : 1.0000  
 Use Multiplier & Dilution Factor with ISTDs

| Signal                                   | RetTime | Type | Width  | Area       | Height    | Area    |
|------------------------------------------|---------|------|--------|------------|-----------|---------|
|                                          | (min)   |      | (min)  | (mAU*s)    | (mAU)     | %       |
| Signal 1: DAD1 A, Sig=250,10 Ref=360,100 | 10.850  | HR   | 0.3304 | 3104.63135 | 139.12048 | 97.0219 |
| Signal 2: DAD1 B, Sig=254,10 Ref=360,100 | 10.850  | HR   | 0.3304 | 3104.63135 | 139.12048 | 97.0219 |
| Signal 3: DAD1 C, Sig=210,10 Ref=360,100 | 10.850  | HR   | 0.3304 | 3104.63135 | 139.12048 | 97.0219 |
| Signal 4: DAD1 D, Sig=230,10 Ref=360,100 | 10.850  | HR   | 0.3304 | 3104.63135 | 139.12048 | 97.0219 |
| Signal 5: DAD1 E, Sig=280,10 Ref=360,100 | 10.850  | HR   | 0.3304 | 3104.63135 | 139.12048 | 97.0219 |
| Totals :                                 |         |      |        | 3199.92894 | 140.75576 |         |

Results obtained with enhanced integrator!  
 \*\*\* End of Report \*\*\*

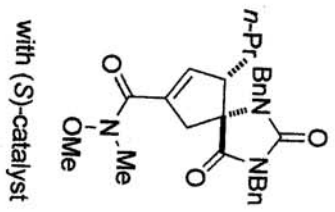

Injection Date : 5/3/2011 11:40 PM  
 Sample Name : WeInreb R  
 Acq. Operator : NB  
 Acq. Instrument : Instrument 1  
 Different Inj Volume from Sequence :  
 Acq. Method : C:\HPCHEM\1\METHODS\IB-15-30.M  
 Last changed : 4/7/2011 9:46:30 PM by CC  
 Analysis Method : C:\HPCHEM\1\METHODS\AS-00730.M  
 Last changed : 5/3/2011 12:23:07 PM by CC

Seq. Line : 2  
 Location : Vial 33  
 Inj : 1  
 Inj Volume : 15 µl  
 Inj Volume : 3 µl

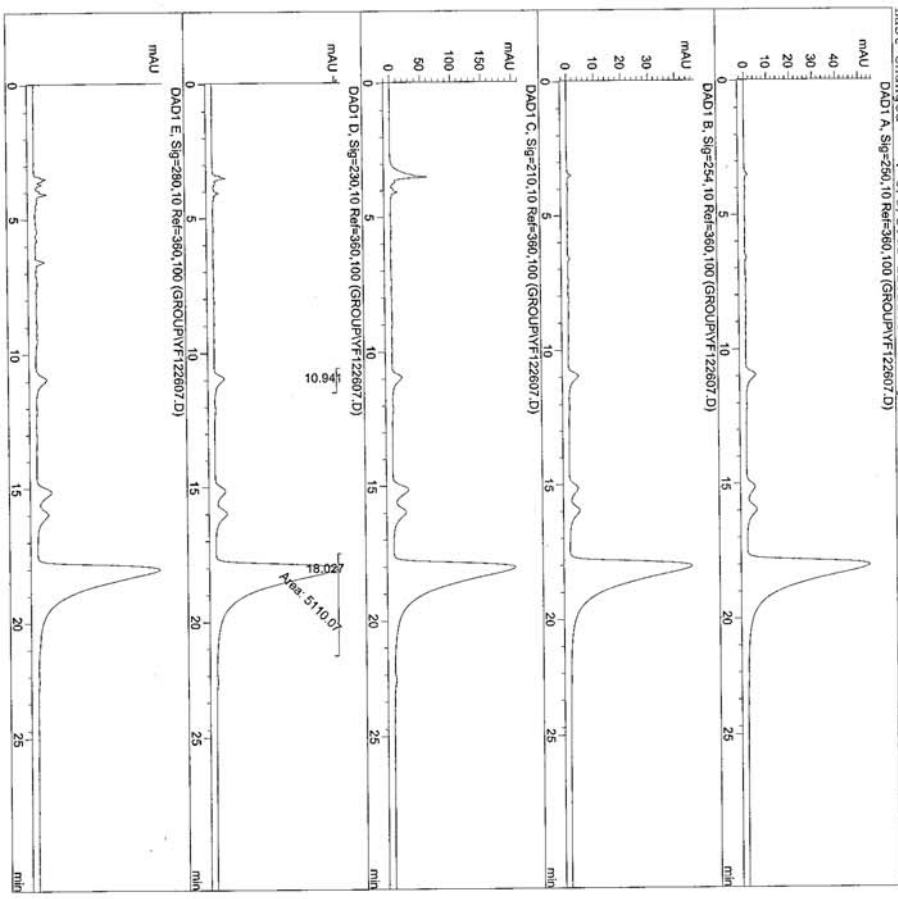

Area Percent Report

Sorted By : Signal  
 Multiplier : 1.0000  
 Dilution : 1.0000  
 Use Multiplier & Dilution Factor with ISTDs

Signal 1: DAD1 A, Sig=250,10 Ref=360,100

Signal 2: DAD1 B, Sig=254,10 Ref=360,100

Signal 3: DAD1 C, Sig=210,10 Ref=360,100

Signal 4: DAD1 D, Sig=230,10 Ref=360,100

| Peak # | Retention Time [min] | Type | Width [min] | Area [mAU*s] | Height [mAU] | Area %  |
|--------|----------------------|------|-------------|--------------|--------------|---------|
| 1      | 10.941               | BB   | 0.3298      | 157.23886    | 7.11569      | 2.9852  |
| 2      | 18.027               | MM   | 0.9154      | 5110.06934   | 93.03423     | 97.0148 |

Totals : 5267.30820 100.14992

Results obtained with enhanced integrator:!

Signal 5: DAD1 E, Sig=280,10 Ref=360,100

\*\*\* End of Report \*\*\*

with (R)-catalyst
